# Supplementary material for: Cell-based and multi-omics profiling reveals dynamic metabolic repurposing of mitochondria to drive developmental progression of Trypanosoma brucei
Source: PubMed Central journal article supplement (PMC7307792; doi:10.1371/journal.pbio.3000741), 2020-06-10

Day 0 RBP6 overexpression

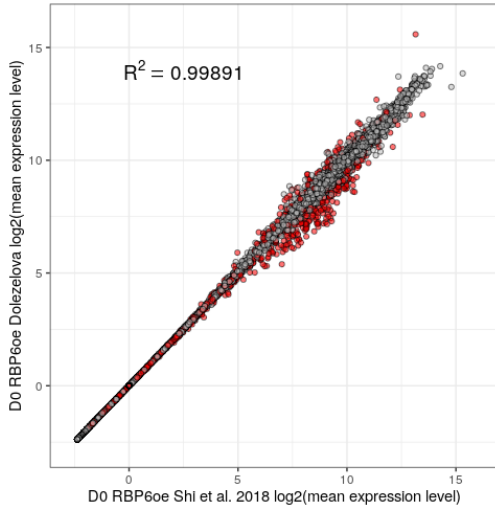

Day 2 RBP6 overexpression

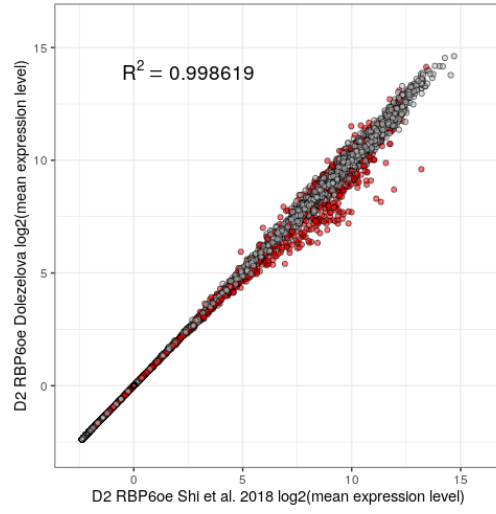

Day 3 RBP6 overexpression

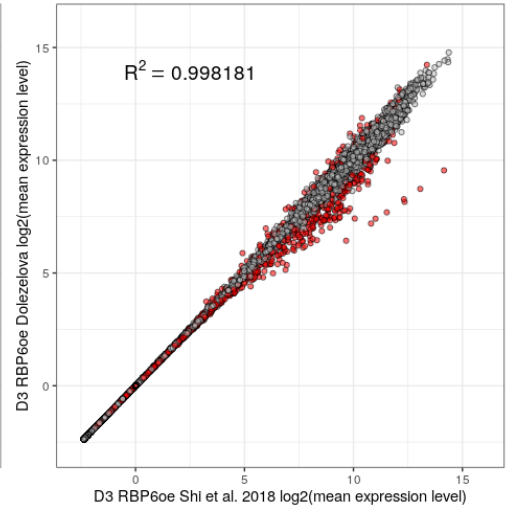

Day 4 RBP6 overexpression

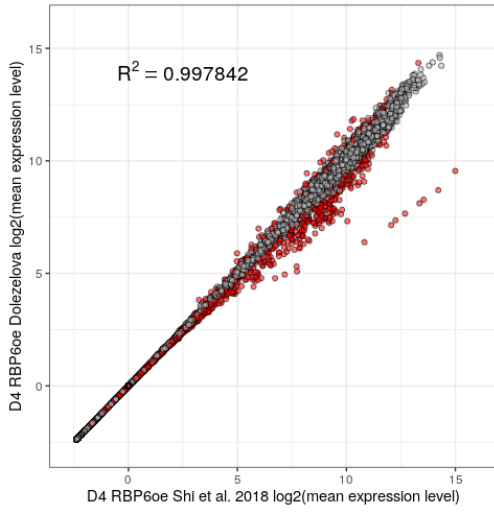

Day 6 RBP6 overexpression

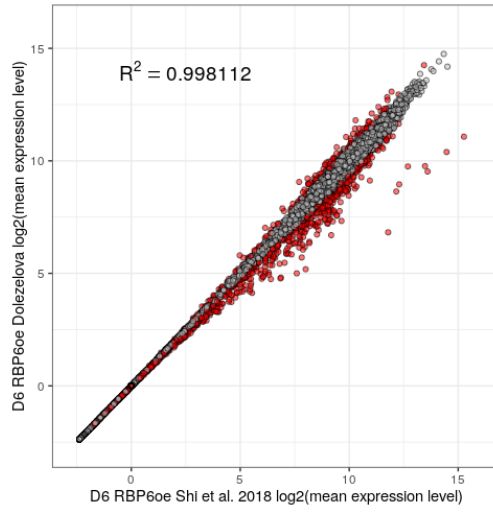

Supplement: pbio.3000741.s002.pdf [file pbio.3000741.s002.pdf]
