# Supplementary material for: Cell-based and multi-omics profiling reveals dynamic metabolic repurposing of mitochondria to drive developmental progression of Trypanosoma brucei
Source: PubMed Central journal article supplement (PMC7307792; doi:10.1371/journal.pbio.3000741), 2020-06-10
Supplement: pbio.3000741.s004.pdf [file pbio.3000741.s004.pdf]

**Color Key  
and Density Plot**

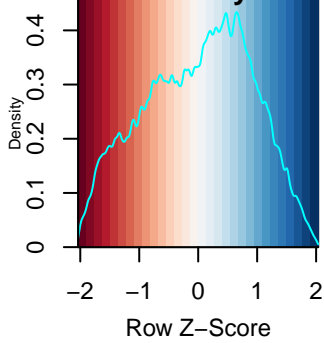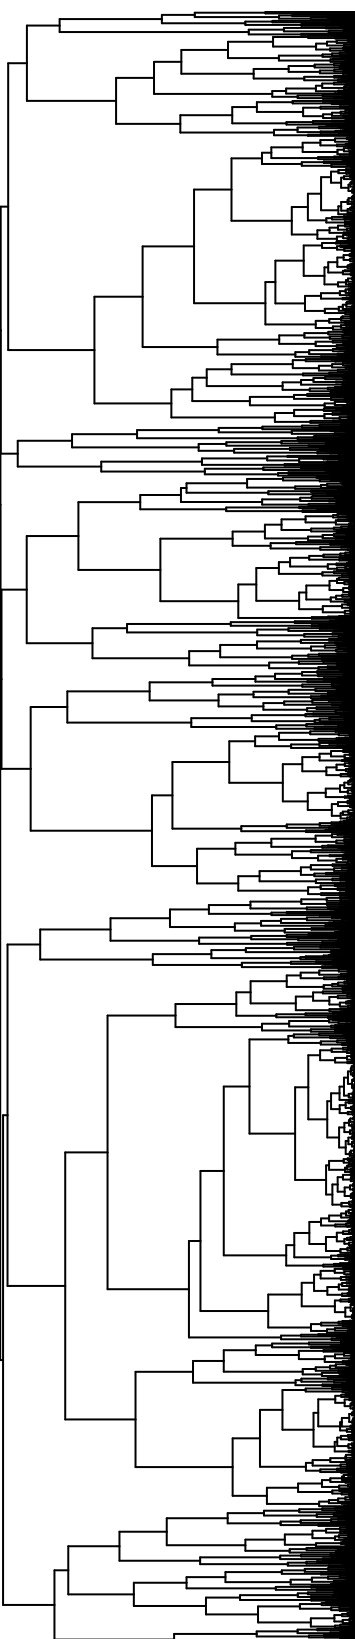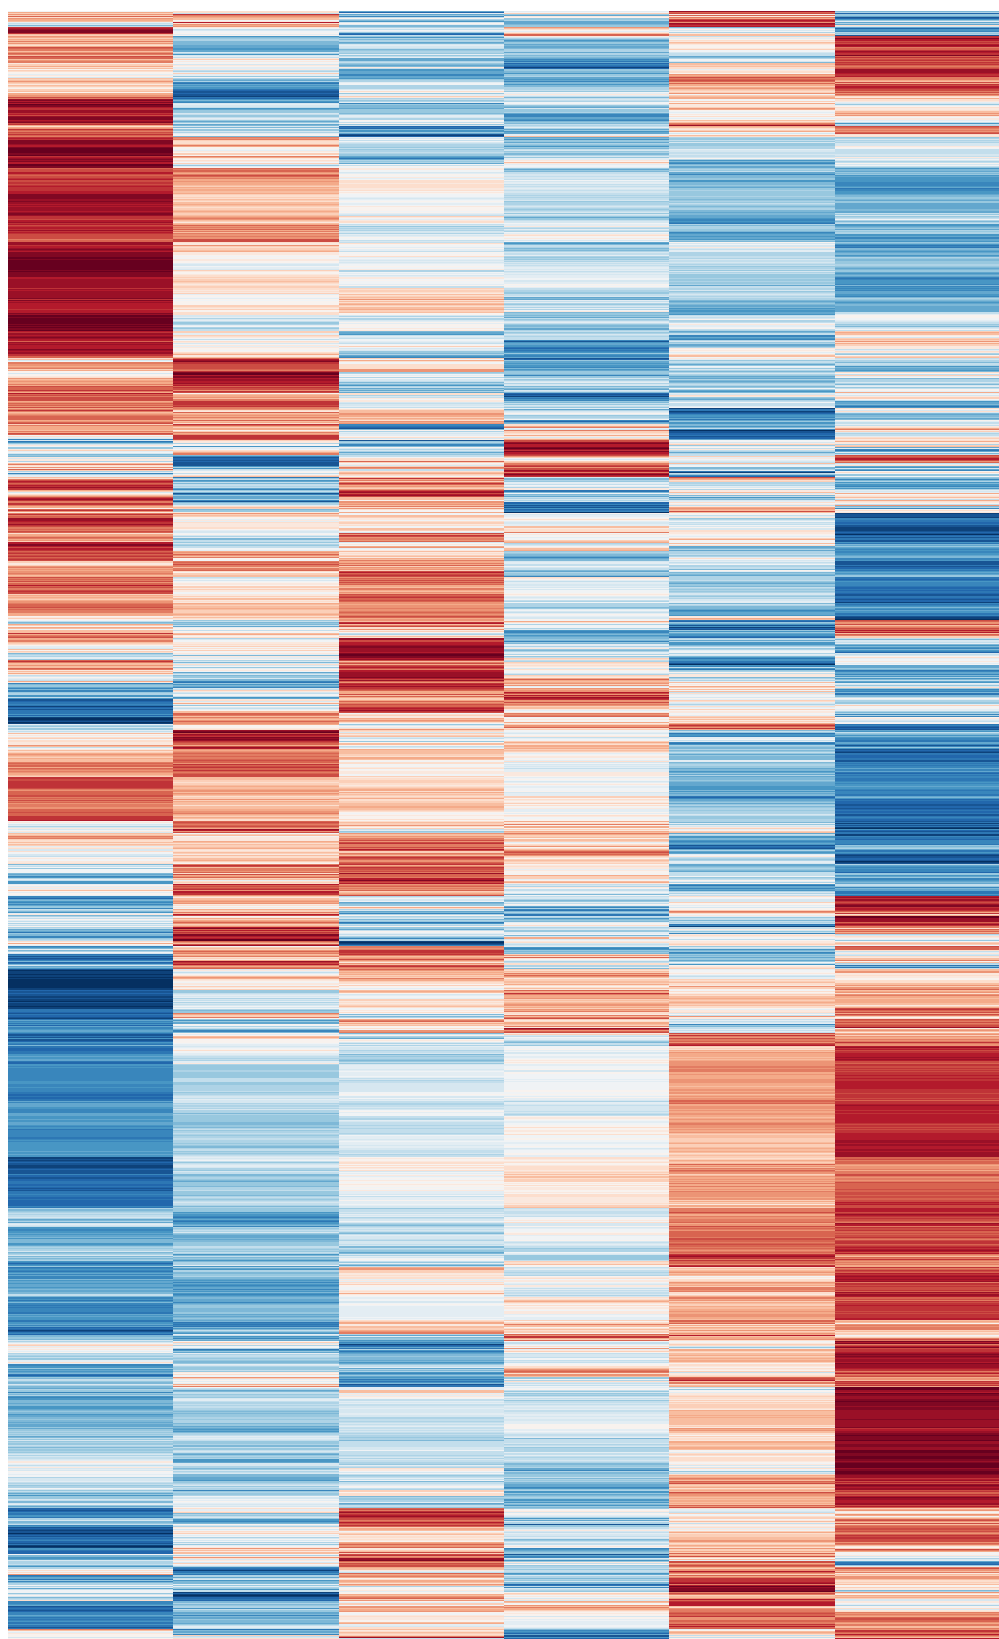

0d 2d 3d 4d 6d 8d
