# Supplementary material for: Cell-based and multi-omics profiling reveals dynamic metabolic repurposing of mitochondria to drive developmental progression of Trypanosoma brucei
Source: PubMed Central journal article supplement (PMC7307792; doi:10.1371/journal.pbio.3000741), 2020-06-10

standardized PC2 (9.0% explained var.)

Timepoint

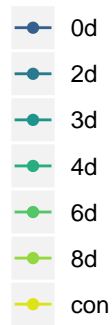

standardized PC1 (34.9% explained var.)

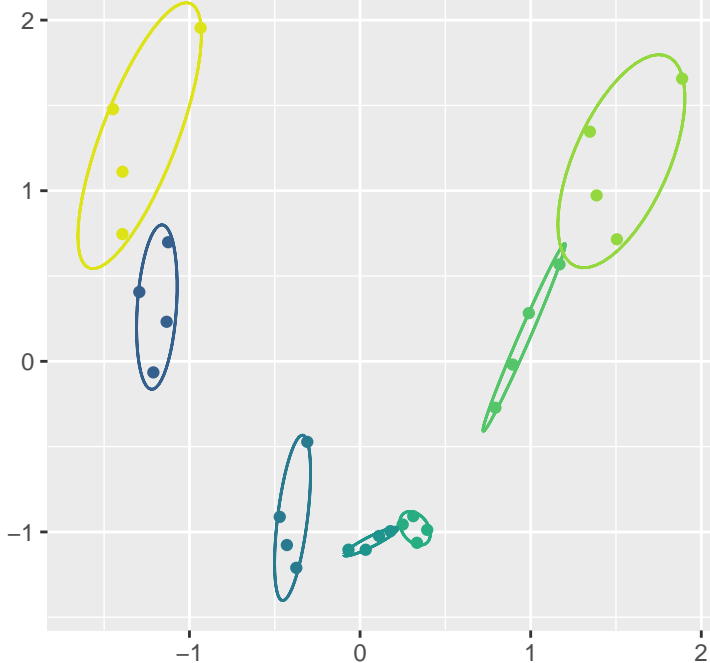

Supplement: pbio.3000741.s005.pdf [file pbio.3000741.s005.pdf]
