# Supplementary material for: Cell-based and multi-omics profiling reveals dynamic metabolic repurposing of mitochondria to drive developmental progression of Trypanosoma brucei
Source: PubMed Central journal article supplement (PMC7307792; doi:10.1371/journal.pbio.3000741), 2020-06-10

## Proteins involved in redox metabolism

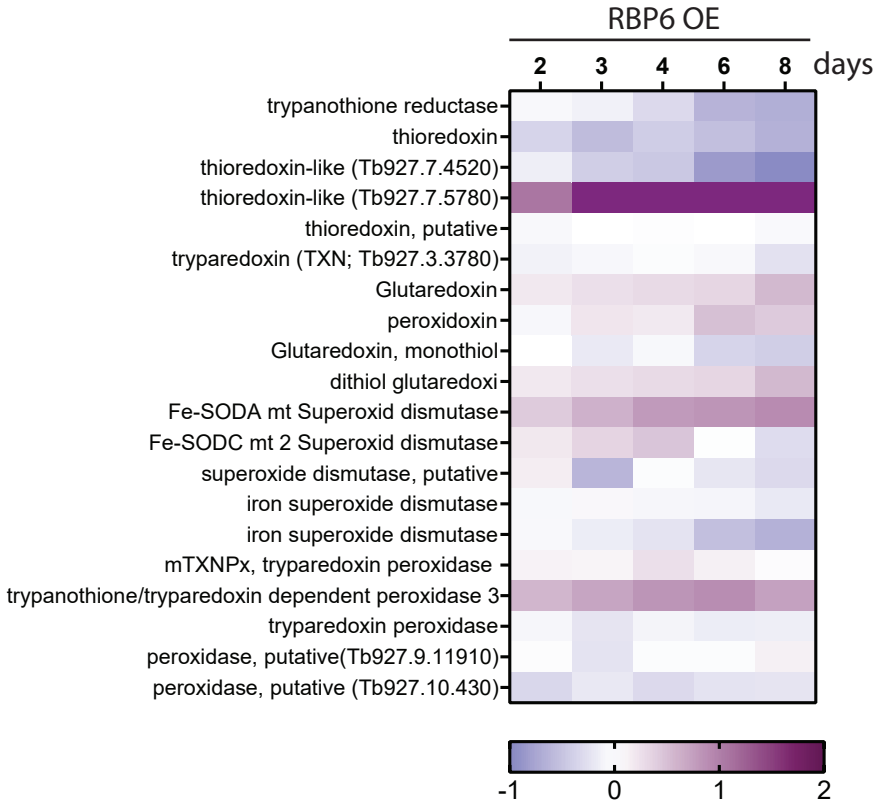

## Mitochondrial carrier proteins (MCPs) and a putative citrate carrier

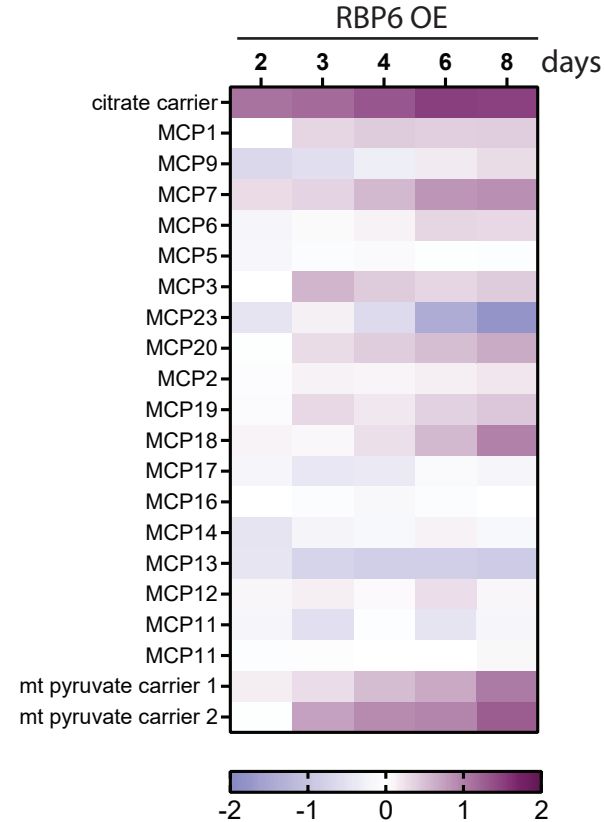

Supplement: pbio.3000741.s008.pdf [file pbio.3000741.s008.pdf]
