# Supplementary material for: Cell-based and multi-omics profiling reveals dynamic metabolic repurposing of mitochondria to drive developmental progression of Trypanosoma brucei
Source: PubMed Central journal article supplement (PMC7307792; doi:10.1371/journal.pbio.3000741), 2020-06-10

# S1\_raw\_images

Figure 1F

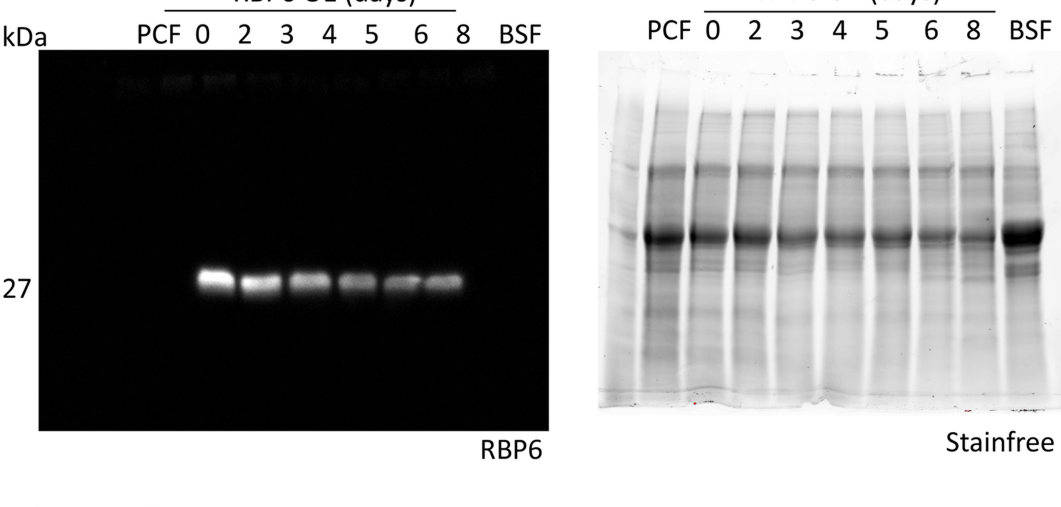

Figure 3B

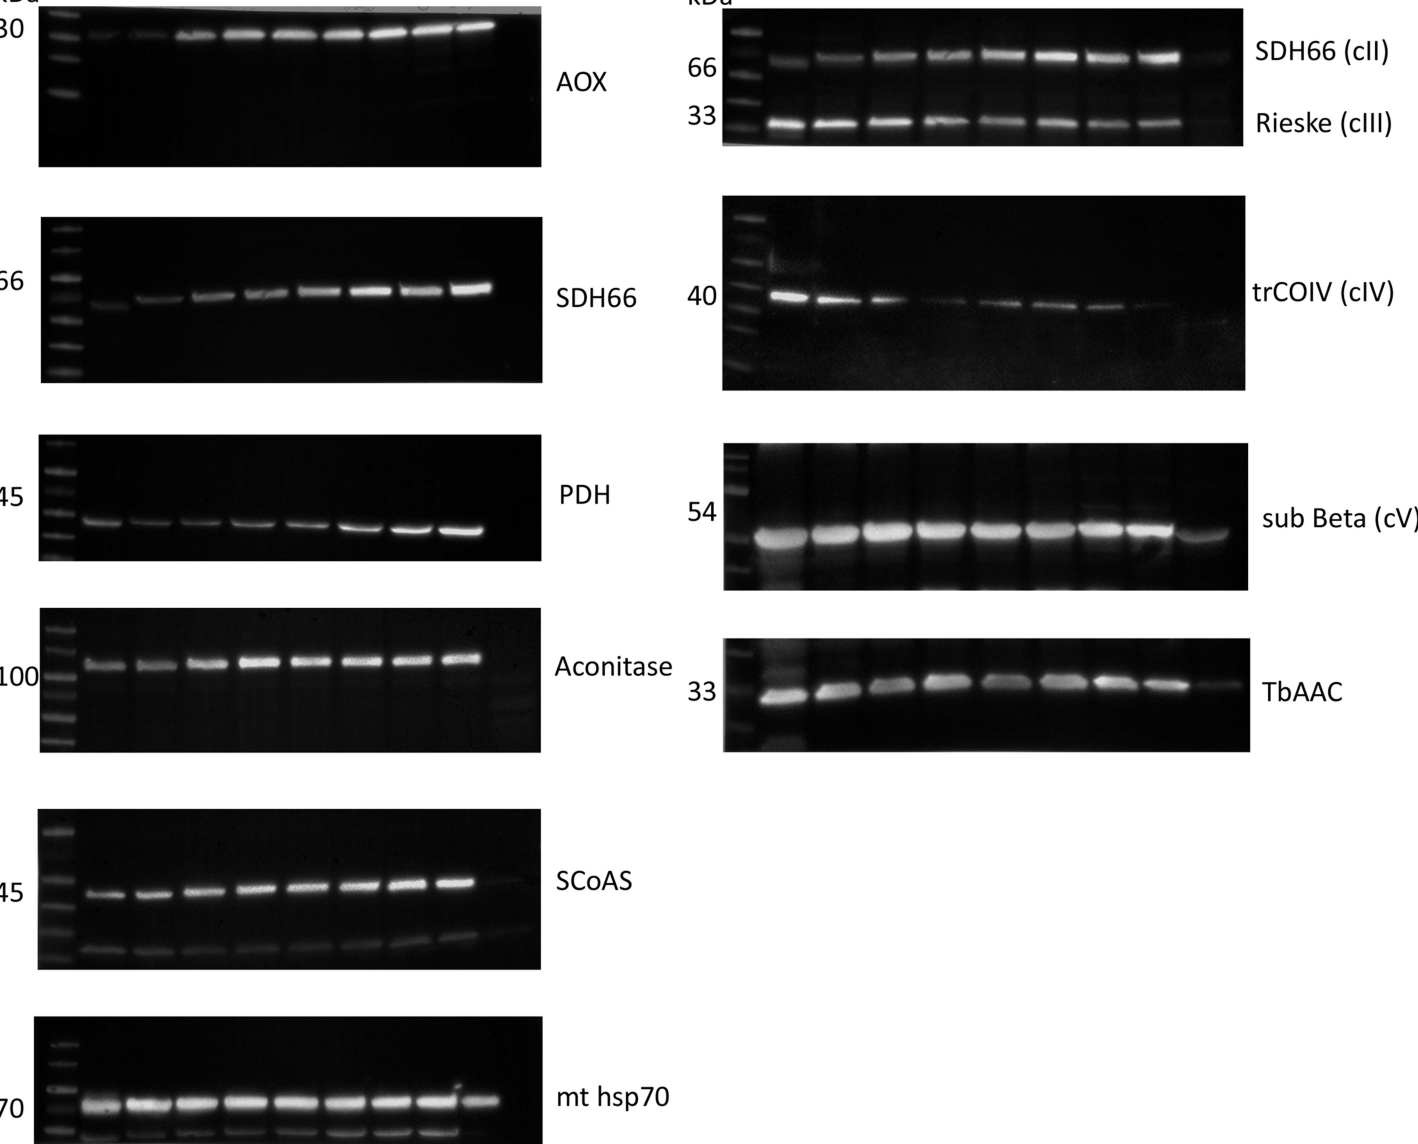

Figure 6

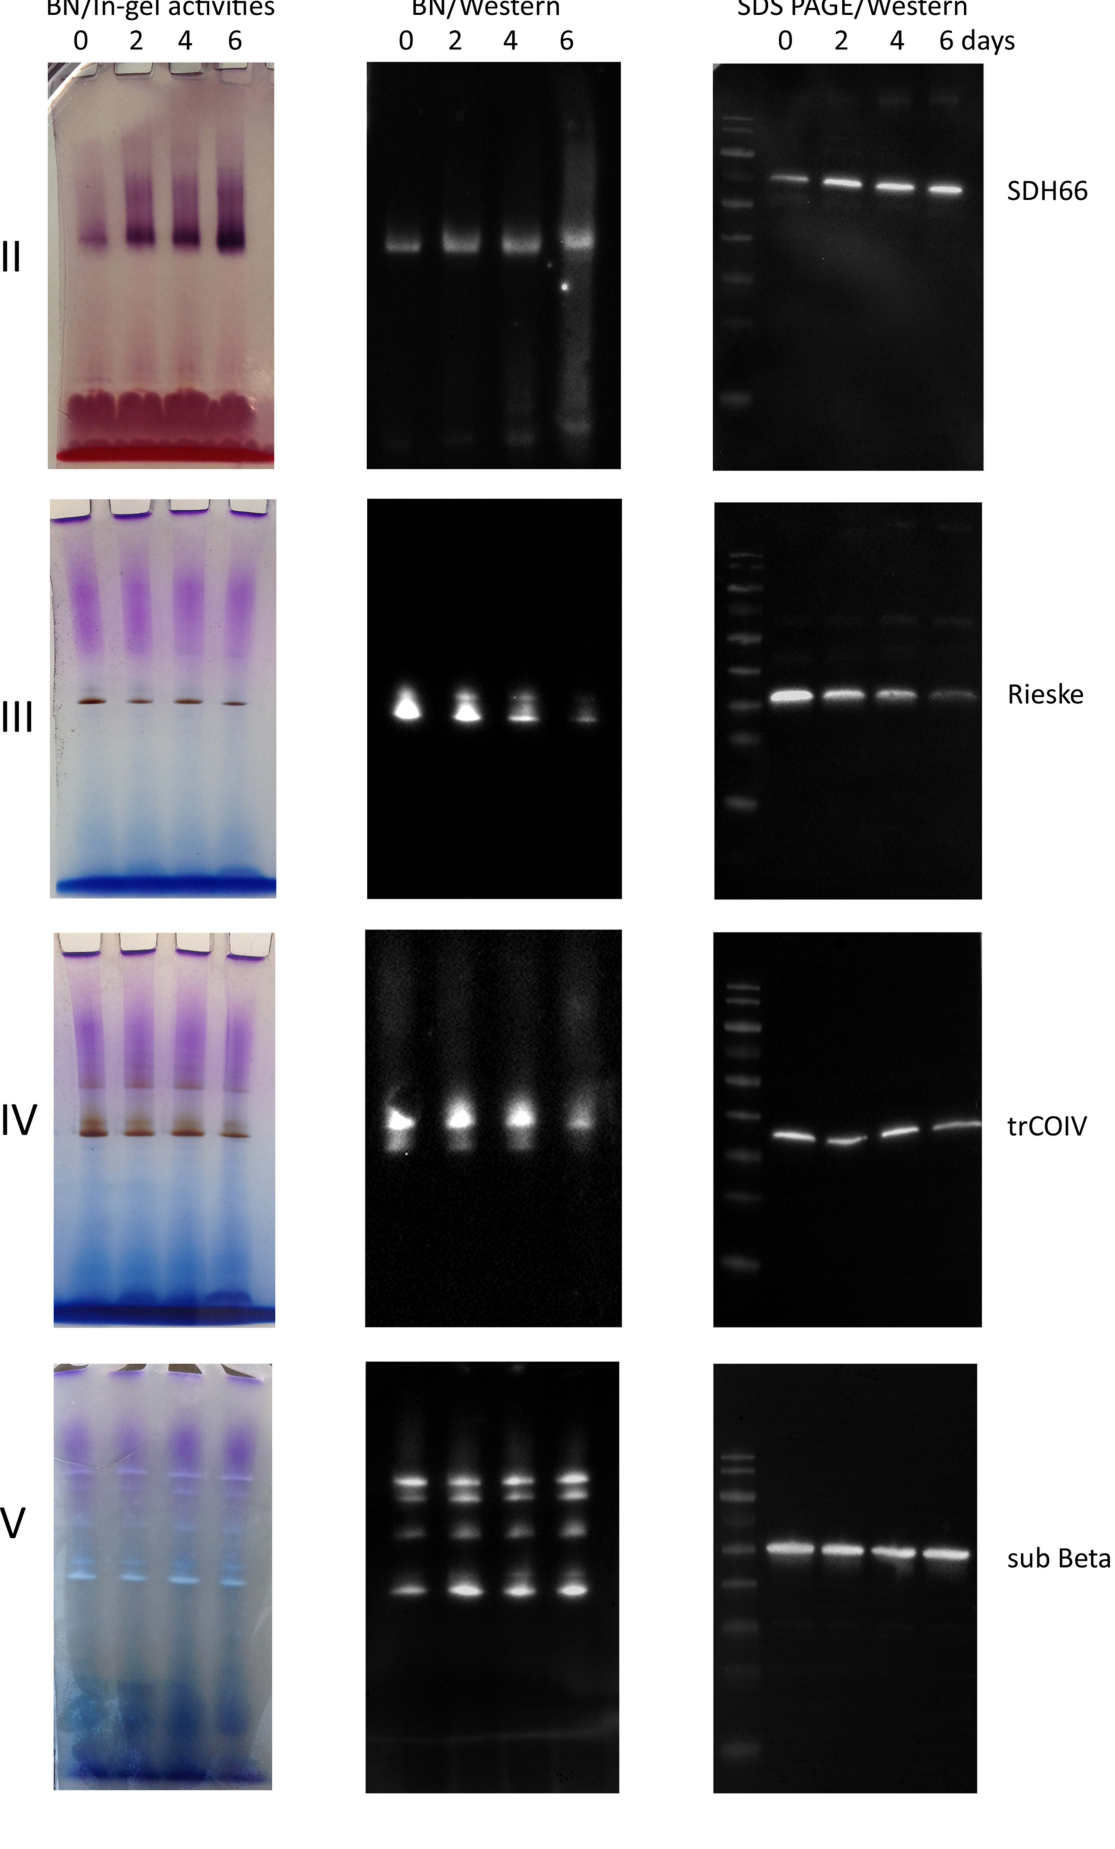

Figure 7C

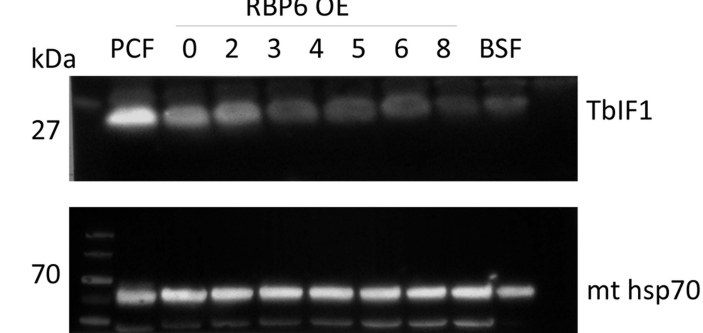

Figure 10C

Digitonine fractionation - catalase localization

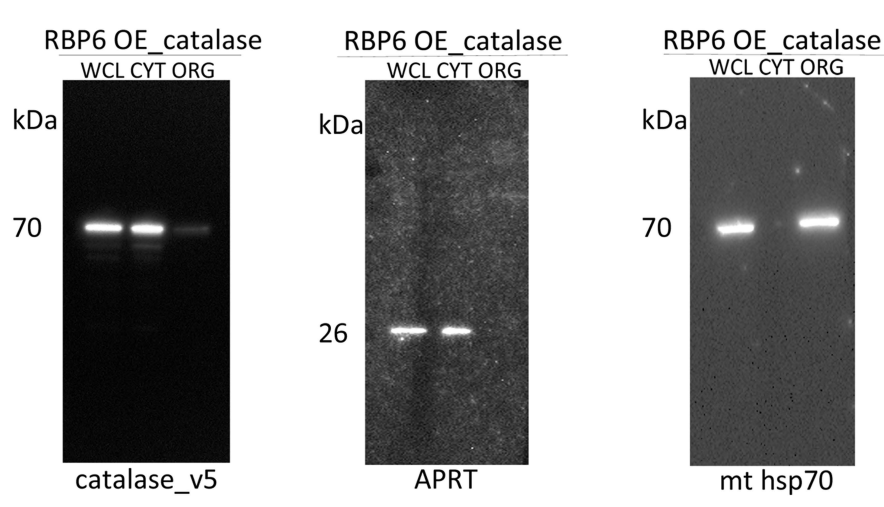

Figure 10E

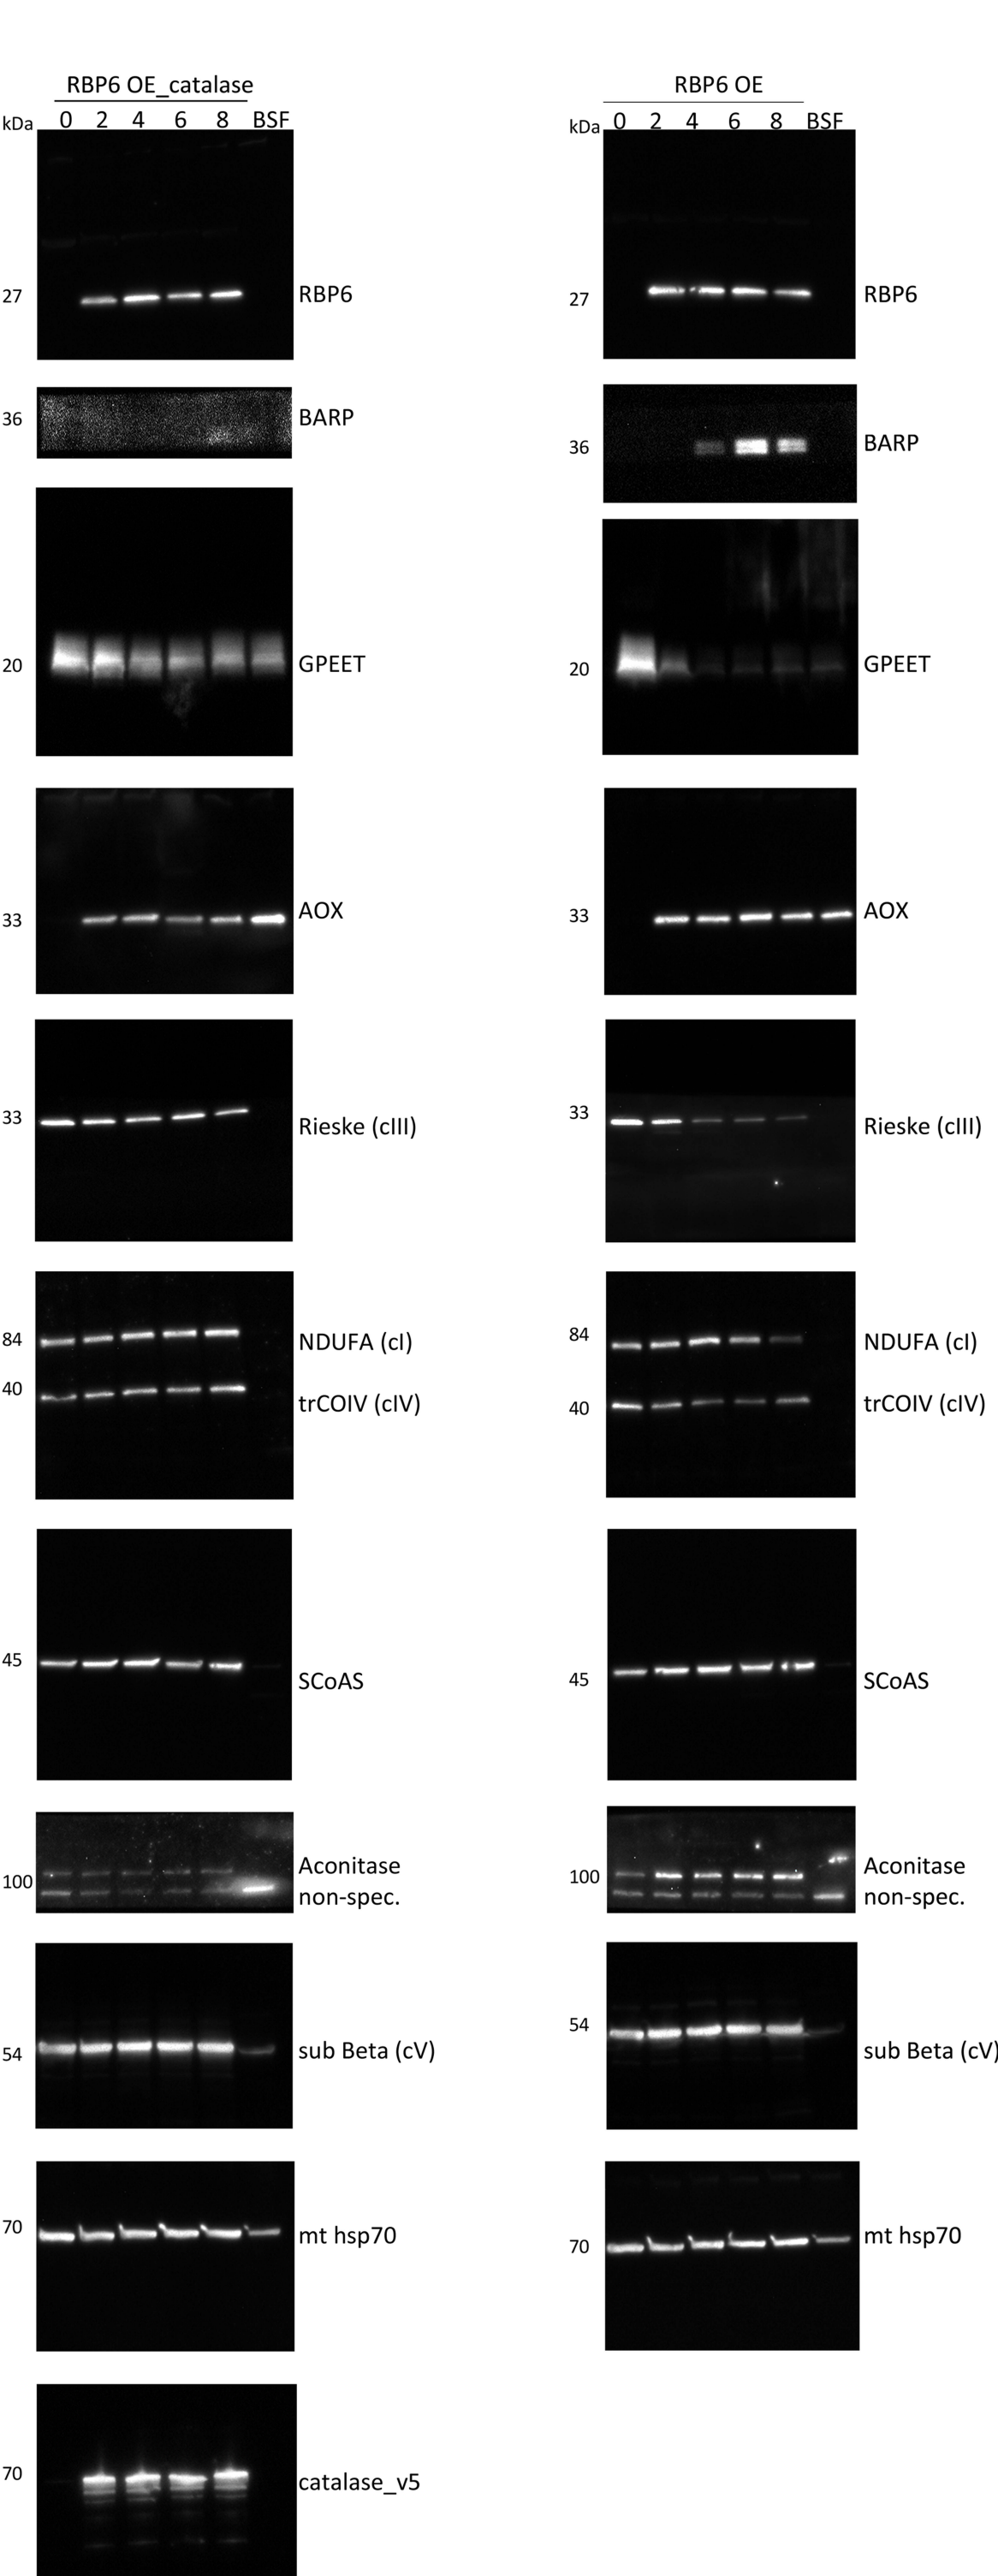

Supplement: pbio.3000741.s017.pdf [file pbio.3000741.s017.pdf]
