# Supplementary material for: Cell-based and multi-omics profiling reveals dynamic metabolic repurposing of mitochondria to drive developmental progression of Trypanosoma brucei
Source: PLoS Biol. 2020 Jun 10;18(6):e3000741. doi: 10.1371/journal.pbio.3000741 (PMC7307792; doi:10.1371/journal.pbio.3000741)
Supplement: S4 Table — Sheet 1 contains Tb427 and Tb927 gene IDs and descriptions for 5,227 protein groups identified by a minimum of 2 peptides (1 unique) and present in at least two out of four replicates. Other sheets contain protein groups differentially expressed (log2 fold change <−1, log2 fold change >1). RBP6, RNA binding protein 6. (XLSX) [file pbio.3000741.s012.xlsx]

## Sheet: reduced proteinGroups
my_label	Protein.IDs	Link	Gene.names	Single.gene.name	best_orthologs	orthologs	description	Peptides	Razor...unique.peptides	Unique.peptides	Sequence.coverage....	Mol..weight..kDa.	Sequence.length	log2.LFQ.intensity.0d_1	log2.LFQ.intensity.0d_2	log2.LFQ.intensity.0d_3	log2.LFQ.intensity.0d_4	log2.LFQ.intensity.2d_1	log2.LFQ.intensity.2d_2	log2.LFQ.intensity.2d_3	log2.LFQ.intensity.2d_4	log2.LFQ.intensity.3d_1	log2.LFQ.intensity.3d_2	log2.LFQ.intensity.3d_3	log2.LFQ.intensity.3d_4	log2.LFQ.intensity.4d_1	log2.LFQ.intensity.4d_2	log2.LFQ.intensity.4d_3	log2.LFQ.intensity.4d_4	log2.LFQ.intensity.6d_1	log2.LFQ.intensity.6d_2	log2.LFQ.intensity.6d_3	log2.LFQ.intensity.6d_4	log2.LFQ.intensity.8d_1	log2.LFQ.intensity.8d_2	log2.LFQ.intensity.8d_3	log2.LFQ.intensity.8d_4	imputed.log2.LFQ.intensity.0d_1	imputed.log2.LFQ.intensity.0d_2	imputed.log2.LFQ.intensity.0d_3	imputed.log2.LFQ.intensity.0d_4	imputed.log2.LFQ.intensity.2d_1	imputed.log2.LFQ.intensity.2d_2	imputed.log2.LFQ.intensity.2d_3	imputed.log2.LFQ.intensity.2d_4	imputed.log2.LFQ.intensity.3d_1	imputed.log2.LFQ.intensity.3d_2	imputed.log2.LFQ.intensity.3d_3	imputed.log2.LFQ.intensity.3d_4
Tb427_110103300	Tb427_110103300.1	http://tritrypdb.org/tritrypdb/processQuestion.do?questionFullName=GeneQuestions.GeneByLocusTag&questionSubmit=Get+Answer&ds_gene_ids_data=Tb427_110103300.1	Tb427_110103300	Tb427_110103300	Tb927.11.9530:mRNA-p1	Tb927.11.9530:mRNA-p1;Tb927.11.6870:mRNA-p1	14-3-3 protein, putative	22	21	21	85.1	30.31	262	33.1754	33.1567	33.2052	32.8158	33.2826	33.1242	33.3055	33.0911	33.3964	33.1838	33.3543	33.126	33.28	33.1996	33.4283	33.1384	33.3519	32.857	32.9153	33.1289	32.869	32.7298	32.8818	32.9101	33.1754	33.1567	33.2052	32.8158	33.2826	33.1242	33.3055	33.0911	33.3964	33.1838	33.3543	33.126
Tb427_110073700	Tb427_110073700.1	http://tritrypdb.org/tritrypdb/processQuestion.do?questionFullName=GeneQuestions.GeneByLocusTag&questionSubmit=Get+Answer&ds_gene_ids_data=Tb427_110073700.1	Tb427_110073700	Tb427_110073700	Tb927.11.6870:mRNA-p1	Tb927.11.6870:mRNA-p1;Tb927.11.9530:mRNA-p1	14-3-3 protein, putative	24	24	23	84.9	29.196	252	32.6768	32.7678	33.064	33.0986	32.9007	32.6793	32.9664	33.3594	33.1553	33.0642	33.1658	33.0683	33.0049	32.7292	32.9919	32.7276	33.1364	32.71	32.7132	32.8077	32.7504	32.4577	32.6692	32.7732	32.6768	32.7678	33.064	33.0986	32.9007	32.6793	32.9664	33.3594	33.1553	33.0642	33.1658	33.0683
Tb427_030032900	Tb427_030032900.1	http://tritrypdb.org/tritrypdb/processQuestion.do?questionFullName=GeneQuestions.GeneByLocusTag&questionSubmit=Get+Answer&ds_gene_ids_data=Tb427_030032900.1	Tb427_030032900	Tb427_030032900	Tb927.3.3230:mRNA-p1	Tb927.3.3230:mRNA-p1;Tb927.10.6680:mRNA-p1;Tb927.10.12980:mRNA-p1;Tb927.5.2420:mRNA-p1;Tb927.4.3840:mRNA-p1;Tb927.3.4540:mRNA-p1;Tb927.11.9210:mRNA-p1;Tb927.11.15630:mRNA-p1	16S rRNA methyltransferase RsmB/F, putative	20	20	20	44.7	67.443	609	28.7751	28.7694	28.6111	28.8756	28.8102	28.8689	28.9323	28.7882	28.9684	29.0244	29.0278	28.9411	29.0746	29.2813	29.0294	29.1455	28.6594	29.066	28.9088	29.4302	28.8949	28.7928	28.9772	29.2189	28.7751	28.7694	28.6111	28.8756	28.8102	28.8689	28.9323	28.7882	28.9684	29.0244	29.0278	28.9411
Tb427_050030500	Tb427_050030500.1	http://tritrypdb.org/tritrypdb/processQuestion.do?questionFullName=GeneQuestions.GeneByLocusTag&questionSubmit=Get+Answer&ds_gene_ids_data=Tb427_050030500.1	Tb427_050030500	Tb427_050030500	Tb927.5.2420:mRNA-p1	Tb927.5.2420:mRNA-p1;Tb927.10.6680:mRNA-p1;Tb927.3.3230:mRNA-p1;Tb927.4.3840:mRNA-p1;Tb927.10.12980:mRNA-p1;Tb927.11.15630:mRNA-p1	16S rRNA methyltransferase RsmB/F, putative	3	3	3	4.3	102.72	935	25.1974		24.7256			24.7664	24.9168			24.6148			24.4583	24.8377	24.6733			24.886	24.7377	24.8352			24.7405		25.1974	24.8745	24.7256	24.6319	24.9915	24.7664	24.9168	24.5682	24.8972	24.6148	24.3662	24.3873
Tb427_100137000	Tb427_100137000.1	http://tritrypdb.org/tritrypdb/processQuestion.do?questionFullName=GeneQuestions.GeneByLocusTag&questionSubmit=Get+Answer&ds_gene_ids_data=Tb427_100137000.1	Tb427_100137000	Tb427_100137000	Tb927.10.12980:mRNA-p1	Tb927.10.12980:mRNA-p1;Tb927.3.3230:mRNA-p1;Tb927.10.6680:mRNA-p1;Tb927.5.2420:mRNA-p1;Tb927.4.3840:mRNA-p1;Tb927.11.15630:mRNA-p1	16S rRNA methyltransferase RsmB/F, putative	26	26	26	44	88.801	806	28.3102	28.4395	28.3519	28.4692	28.3591	28.4499	28.361	28.1815	28.5823	28.5028	28.3139	28.265	28.4732	28.5436	28.6075	28.7316	28.6126	28.6943	28.3103	28.2545	28.4797	28.6141	28.306	28.5198	28.3102	28.4395	28.3519	28.4692	28.3591	28.4499	28.361	28.1815	28.5823	28.5028	28.3139	28.265
Tb427_110099800	Tb427_110099800.1	http://tritrypdb.org/tritrypdb/processQuestion.do?questionFullName=GeneQuestions.GeneByLocusTag&questionSubmit=Get+Answer&ds_gene_ids_data=Tb427_110099800.1	Tb427_110099800	Tb427_110099800	Tb927.11.9210:mRNA-p1	Tb927.11.9210:mRNA-p1;Tb927.3.3230:mRNA-p1;Tb927.4.3840:mRNA-p1;Tb927.11.15630:mRNA-p1	16S rRNA methyltransferase RsmB/F, putative	12	12	12	29.4	64.002	581	28.2899	27.9211	28.5069	28.3116	28.3369	27.7152	28.2455	27.7831	27.7584	27.9322	27.8908	27.3439	27.736	27.6676	27.6311	27.3027	27.2275	26.8473	26.8484	27.5973	27.2601	26.5484	27.1685	27.0722	28.2899	27.9211	28.5069	28.3116	28.3369	27.7152	28.2455	27.7831	27.7584	27.9322	27.8908	27.3439
Tb427_110174900	Tb427_110174900.1	http://tritrypdb.org/tritrypdb/processQuestion.do?questionFullName=GeneQuestions.GeneByLocusTag&questionSubmit=Get+Answer&ds_gene_ids_data=Tb427_110174900.1	Tb427_110174900	Tb427_110174900	Tb927.11.15630:mRNA-p1	Tb927.11.15630:mRNA-p1;Tb927.5.2420:mRNA-p1;Tb927.4.3840:mRNA-p1;Tb927.10.12980:mRNA-p1;Tb927.10.6680:mRNA-p1;Tb927.3.3230:mRNA-p1;Tb927.11.9210:mRNA-p1	16S rRNA methyltransferase RsmB/F, putative	11	11	11	40.7	37.832	337	28.3944	28.331	28.337	27.6311	27.9757	27.7035	27.9788	27.9761	27.8681	27.7255	27.4004	27.6632	27.4302	27.3905	27.7463	27.6996	26.3201	26.6122	26.7781	26.9084	26.3596	26.7323	26.71	25.7602	28.3944	28.331	28.337	27.6311	27.9757	27.7035	27.9788	27.9761	27.8681	27.7255	27.4004	27.6632
Tb427_100071300	Tb427_100071300.1	http://tritrypdb.org/tritrypdb/processQuestion.do?questionFullName=GeneQuestions.GeneByLocusTag&questionSubmit=Get+Answer&ds_gene_ids_data=Tb427_100071300.1	Tb427_100071300	Tb427_100071300	Tb927.10.6680:mRNA-p1	Tb927.10.6680:mRNA-p1;Tb927.3.3230:mRNA-p1;Tb927.5.2420:mRNA-p1;Tb927.10.12980:mRNA-p1;Tb927.4.3840:mRNA-p1;Tb927.11.15630:mRNA-p1	16S rRNA methyltransferase RsmB/F, putative	25	25	25	43.5	82.503	740	29.479	29.6281	29.7411	29.9131	29.0072	29.2768	29.4993	29.2364	28.911	29.0566	28.8921	28.8398	28.8775	28.974	28.8503	28.5059	28.5575	28.8935	28.5106	28.6794	28.6869	28.8873	27.9409	28.4942	29.479	29.6281	29.7411	29.9131	29.0072	29.2768	29.4993	29.2364	28.911	29.0566	28.8921	28.8398
Tb427_020010000	Tb427_020010000.1	http://tritrypdb.org/tritrypdb/processQuestion.do?questionFullName=GeneQuestions.GeneByLocusTag&questionSubmit=Get+Answer&ds_gene_ids_data=Tb427_020010000.1	Tb427_020010000	Tb427_020010000	Tb927.2.2440:mRNA-p1	Tb927.2.2440:mRNA-p1	26S proteasome regulatory subunit RPN6 N-terminal domain/PCI domain containing protein, putative	26	26	26	61.4	57.323	513	31.9222	31.89	31.7635	31.8508	32.0803	32.0001	31.9372	31.9316	32.087	31.9599	31.8795	31.8745	32.1102	32.0784	31.8907	31.9489	31.9571	32.1388	31.857	32.0597	31.7616	32.0206	31.8966	31.7613	31.9222	31.89	31.7635	31.8508	32.0803	32.0001	31.9372	31.9316	32.087	31.9599	31.8795	31.8745
Tb427_110179200	Tb427_110179200.1	http://tritrypdb.org/tritrypdb/processQuestion.do?questionFullName=GeneQuestions.GeneByLocusTag&questionSubmit=Get+Answer&ds_gene_ids_data=Tb427_110179200.1	Tb427_110179200	Tb427_110179200	Tb927.11.16030:mRNA-p1	Tb927.11.16030:mRNA-p1	26S proteasome subunit RPN7/PCI domain containing protein, putative	22	22	22	59.1	45.533	399	30.8452	30.7955	30.5685	30.7476	30.8138	30.689	30.2657	30.8044	30.7783	30.57	30.7846	30.6599	30.7734	30.6151	30.4578	30.6362	30.8882	30.8088	30.8294	30.4432	30.3935	31.0603	30.7741	30.8661	30.8452	30.7955	30.5685	30.7476	30.8138	30.689	30.2657	30.8044	30.7783	30.57	30.7846	30.6599
Tb427_080038300	Tb427_080038300.1	http://tritrypdb.org/tritrypdb/processQuestion.do?questionFullName=GeneQuestions.GeneByLocusTag&questionSubmit=Get+Answer&ds_gene_ids_data=Tb427_080038300.1	Tb427_080038300	Tb427_080038300	Tb927.8.3380:mRNA-p1	Tb927.8.3380:mRNA-p1	2Fe-2S iron-sulfur cluster binding domain containing protein, putative	17	17	17	63.2	27.259	242	30.7103	30.7815	30.6549	30.5125	31.2534	31.6959	31.6243	31.4874	31.4132	31.8791	31.82	31.8262	31.6617	32.1583	32.0538	31.7632	32.0848	32.0885	32.342	32.4354	32.5691	32.2007	32.7021	32.3844	30.7103	30.7815	30.6549	30.5125	31.2534	31.6959	31.6243	31.4874	31.4132	31.8791	31.82	31.8262
Tb427_070012300	Tb427_070012300.1	http://tritrypdb.org/tritrypdb/processQuestion.do?questionFullName=GeneQuestions.GeneByLocusTag&questionSubmit=Get+Answer&ds_gene_ids_data=Tb427_070012300.1	Tb427_070012300	Tb427_070012300	Tb927.7.890:mRNA-p1	Tb927.7.890:mRNA-p1;Tb927.4.4980:mRNA-p1	2Fe-2S iron-sulfur cluster binding domain containing protein, putative	3	3	3	20.8	19.681	178	27.1541	27.8581	27.2036	27.4155	27.5755	27.4245	27.3529	27.4335		27.4	27.4782	27.6859	27.4058	27.9458	27.5678	27.5314	27.404	27.9512	27.6702	27.9627	27.7166	27.9052	27.674	28.4322	27.1541	27.8581	27.2036	27.4155	27.5755	27.4245	27.3529	27.4335	24.3176	27.4	27.4782	27.6859
Tb427_100132800	Tb427_100132800.1	http://tritrypdb.org/tritrypdb/processQuestion.do?questionFullName=GeneQuestions.GeneByLocusTag&questionSubmit=Get+Answer&ds_gene_ids_data=Tb427_100132800.1	Tb427_100132800	Tb427_100132800	Tb927.10.12540:mRNA-p1	Tb927.10.12540:mRNA-p1	2Fe-2S iron-sulfur cluster binding domain/NADH-ubiquinone oxidoreductase-G iron-sulfur binding region containing protein, putative	8	8	8	38.9	33.807	303	28.048	28.033	28.0879	27.994	28.3357	28.2947	28.2944	28.2334	28.0863	28.4816	28.525	28.1414	28.126	28.6232	28.4619	28.3187	27.9832	27.6176	28.1938	28.1258	27.3625	27.2494	27.5197	27.2966	28.048	28.033	28.0879	27.994	28.3357	28.2947	28.2944	28.2334	28.0863	28.4816	28.525	28.1414
Tb427_030009300	Tb427_030009300.1	http://tritrypdb.org/tritrypdb/processQuestion.do?questionFullName=GeneQuestions.GeneByLocusTag&questionSubmit=Get+Answer&ds_gene_ids_data=Tb427_030009300.1	Tb427_030009300	Tb427_030009300	Tb927.3.950:mRNA-p1	Tb927.3.950:mRNA-p1;Tb927.2.6310:mRNA-p1;Tb927.2.6270:mRNA-p1;Tb927.2.6230:mRNA-p1;Tb927.2.6180:mRNA-p1;Tb927.2.6210:mRNA-p1;Tb927.9.14600:mRNA-p1;Tb927.5.300b:mRNA-p1;Tb11.v5.0215.1-p1;Tb927.5.300:mRNA-p1;Tb927.7.7500:mRNA-p1	2OG-Fe(II) oxygenase superfamily, putative	11	11	11	35	47.573	420	28.4611	28.6776	28.0066	27.9769	28.6668	28.5097	28.532	28.3443	28.5554	28.7966	28.31	28.007	28.6902	29.0963	28.6186	28.6663	28.606	28.7982	28.4632	29.0252	28.7875	28.5401	28.2618	28.8877	28.4611	28.6776	28.0066	27.9769	28.6668	28.5097	28.532	28.3443	28.5554	28.7966	28.31	28.007
Tb427_050014500	Tb427_050014500.1	http://tritrypdb.org/tritrypdb/processQuestion.do?questionFullName=GeneQuestions.GeneByLocusTag&questionSubmit=Get+Answer&ds_gene_ids_data=Tb427_050014500.1	Tb427_050014500	Tb427_050014500	Tb927.5.980:mRNA-p1	Tb927.5.980:mRNA-p1	2OG-Fe(II) oxygenase superfamily, putative	12	12	12	53.4	35.065	305	28.3722	28.262	28.2731	27.6457	28.2015	28.1637	28.3379	27.8879	28.3759	28.4319	28.476	28.4043	28.1093	28.4537	28.5251	28.2042	28.019	27.9297	28.3047	28.7566	28.352	27.9334	28.534	28.567	28.3722	28.262	28.2731	27.6457	28.2015	28.1637	28.3379	27.8879	28.3759	28.4319	28.476	28.4043
Tb427_040006500	Tb427_040006500.1	http://tritrypdb.org/tritrypdb/processQuestion.do?questionFullName=GeneQuestions.GeneByLocusTag&questionSubmit=Get+Answer&ds_gene_ids_data=Tb427_040006500.1	Tb427_040006500	Tb427_040006500	Tb927.4.460:mRNA-p1	Tb927.4.460:mRNA-p1	2OG-Fe(II) oxygenase superfamily, putative	9	9	9	28.8	37.716	323	27.3355	27.4399	27.1593	26.5514	26.9203	27.4586	26.9692	26.6799	26.3974	26.6671	26.6414	26.5565	26.2828	26.5245	26.8168	27.1064	26.345	26.1916	25.9833	26.7466	25.8249	25.6848	25.8512	25.5872	27.3355	27.4399	27.1593	26.5514	26.9203	27.4586	26.9692	26.6799	26.3974	26.6671	26.6414	26.5565
Tb427_070019600	Tb427_070019600.1	http://tritrypdb.org/tritrypdb/processQuestion.do?questionFullName=GeneQuestions.GeneByLocusTag&questionSubmit=Get+Answer&ds_gene_ids_data=Tb427_070019600.1	Tb427_070019600	Tb427_070019600	Tb927.7.1530:mRNA-p1	Tb927.7.1530:mRNA-p1	2OG-Fe(II) oxygenase superfamily, putative	17	17	17	45.2	50.585	454	28.9499	28.7827	28.6903	28.6995	28.6785	28.4666	28.6734	28.4447	28.3611	28.385	28.4153	28.4139	28.06	27.9922	28.088	28.4665	27.8507	27.4908	28.0128	27.9123	27.6722	27.3424	27.3111	27.2776	28.9499	28.7827	28.6903	28.6995	28.6785	28.4666	28.6734	28.4447	28.3611	28.385	28.4153	28.4139
Tb427_110130200	Tb427_110130200.1	http://tritrypdb.org/tritrypdb/processQuestion.do?questionFullName=GeneQuestions.GeneByLocusTag&questionSubmit=Get+Answer&ds_gene_ids_data=Tb427_110130200.1	Tb427_110130200	Tb427_110130200	Tb927.11.11390:mRNA-p1	Tb927.11.11390:mRNA-p1	2OG-Fe(II) oxygenase superfamily, putative	5	5	5	20.2	30.964	272	26.4756	26.7664	26.1025	26.2932	26.2145	26.4472	25.9926	25.6936	26.2677	26.2959	26.4986	26.5159	26.4048	26.5323	26.2182	26.7683	26.2565	26.9787	27.1387	26.7928	26.5608	26.3578	26.5849	26.9453	26.4756	26.7664	26.1025	26.2932	26.2145	26.4472	25.9926	25.6936	26.2677	26.2959	26.4986	26.5159
Tb427_050046200	Tb427_050046200.1	http://tritrypdb.org/tritrypdb/processQuestion.do?questionFullName=GeneQuestions.GeneByLocusTag&questionSubmit=Get+Answer&ds_gene_ids_data=Tb427_050046200.1	Tb427_050046200	Tb427_050046200	Tb927.5.3950:mRNA-p1	Tb927.5.3950:mRNA-p1	2OG-Fe(II) oxygenase superfamily, putative	7	7	7	30.5	35.624	318	26.8591	26.3816	26.6036	26.5878		26.1615	26.0384	25.9026	26.2831	25.6638	26.0295			25.8688		26.0371						26.0082			26.8591	26.3816	26.6036	26.5878	24.1551	26.1615	26.0384	25.9026	26.2831	25.6638	26.0295	24.9483
Tb427_110108200	Tb427_110108200.1	http://tritrypdb.org/tritrypdb/processQuestion.do?questionFullName=GeneQuestions.GeneByLocusTag&questionSubmit=Get+Answer&ds_gene_ids_data=Tb427_110108200.1	Tb427_110108200	Tb427_110108200	Tb927.11.9980:mRNA-p1	Tb927.11.9980:mRNA-p1;Tb927.11.1450:mRNA-p1	2-oxoglutarate dehydrogenase N-terminus/Dehydrogenase E1 component/Transketolase, pyrimidine binding domain/2-oxoglutarate dehydrogenase C-terminal, putative	73	73	73	75.4	113.03	1005	35.2913	35.2737	35.4052	35.3081	35.5137	35.4011	35.559	35.5551	35.6446	35.6244	35.785	35.7754	35.7632	35.829	35.8868	35.8585	35.7595	36.0049	36.0321	36.1847	36.0748	36.0046	36.1357	36.3881	35.2913	35.2737	35.4052	35.3081	35.5137	35.4011	35.559	35.5551	35.6446	35.6244	35.785	35.7754
Tb427_010019900	Tb427_010019900.1	http://tritrypdb.org/tritrypdb/processQuestion.do?questionFullName=GeneQuestions.GeneByLocusTag&questionSubmit=Get+Answer&ds_gene_ids_data=Tb427_010019900.1	Tb427_010019900	Tb427_010019900			3' exoribonuclease family, domain 1, putative	13	13	13	39.5	42.71	397	29.1892	28.9146	29.075	28.954	28.9485	28.7952	29.0549	28.8599	29.1389	28.8829	28.6149	28.6159	29.1015	28.9396	28.7925	28.7527	28.8267	28.9024	28.5797	29.1001	28.574	28.6525	28.5811	28.5331	29.1892	28.9146	29.075	28.954	28.9485	28.7952	29.0549	28.8599	29.1389	28.8829	28.6149	28.6159
Tb427_100080500	Tb427_100080500.1	http://tritrypdb.org/tritrypdb/processQuestion.do?questionFullName=GeneQuestions.GeneByLocusTag&questionSubmit=Get+Answer&ds_gene_ids_data=Tb427_100080500.1	Tb427_100080500	Tb427_100080500			3' exoribonuclease family, domain 1, putative	9	9	9	36.5	27.525	252	28.773	28.8711	28.3698	28.9691	28.4303	29.1126	28.1811	28.7396	28.2367	28.257	28.5685	28.3334	28.1636	28.1168	28.4293	28.631	28.4588	28.0119	28.2249	28.8134	28.1267	28.2765	28.1614	28.8483	28.773	28.8711	28.3698	28.9691	28.4303	29.1126	28.1811	28.7396	28.2367	28.257	28.5685	28.3334
Tb427_110125600	Tb427_110125600.1	http://tritrypdb.org/tritrypdb/processQuestion.do?questionFullName=GeneQuestions.GeneByLocusTag&questionSubmit=Get+Answer&ds_gene_ids_data=Tb427_110125600.1	Tb427_110125600	Tb427_110125600			3' exoribonuclease family, domain 1, putative	3	3	3	20.3	24.757	232	26.9336	27.0406	27.1029		26.8532		26.8138	27.0417	27.0311	27.0067	27.2447		27.1748		26.9718		26.985	26.6517	26.7548		26.6162	26.5342	26.6962		26.9336	27.0406	27.1029	25.2117	26.8532	24.5132	26.8138	27.0417	27.0311	27.0067	27.2447	24.6204
Tb427_020008200	Tb427_020008200.1	http://tritrypdb.org/tritrypdb/processQuestion.do?questionFullName=GeneQuestions.GeneByLocusTag&questionSubmit=Get+Answer&ds_gene_ids_data=Tb427_020008200.1	Tb427_020008200	Tb427_020008200			3' exoribonuclease family, domain 1, putative	5	5	5	18	27.969	256	27.7985	27.6063	27.418	27.7781	26.7273	27.4282	27.176	26.4571	27.1295	27.2694	27.0302	27.4338	27.1694	26.9893	27.1314	27.2034		27.0739	27.1096	26.8998	27.108	26.9936	26.8488	27.1276	27.7985	27.6063	27.418	27.7781	26.7273	27.4282	27.176	26.4571	27.1295	27.2694	27.0302	27.4338
Tb427_110185700	Tb427_110185700.1	http://tritrypdb.org/tritrypdb/processQuestion.do?questionFullName=GeneQuestions.GeneByLocusTag&questionSubmit=Get+Answer&ds_gene_ids_data=Tb427_110185700.1	Tb427_110185700	Tb427_110185700			3' exoribonuclease family, domain 1/3' exoribonuclease family, domain 2, putative	10	10	10	43.5	31.239	294	29.274	29.1618	28.2397	28.101	27.9508	28.8788	28.0114	28.0491	28.005	27.751	28.4389	28.3738	28.4221	28.2594	27.9596	28.6455	27.7475	28.0148	28.4467	28.0927	27.423	28.1461	28.2553	27.683	29.274	29.1618	28.2397	28.101	27.9508	28.8788	28.0114	28.0491	28.005	27.751	28.4389	28.3738
Tb427_060010100	Tb427_060010100.1	http://tritrypdb.org/tritrypdb/processQuestion.do?questionFullName=GeneQuestions.GeneByLocusTag&questionSubmit=Get+Answer&ds_gene_ids_data=Tb427_060010100.1	Tb427_060010100	Tb427_060010100			3' exoribonuclease family, domain 2, putative	9	9	9	27.3	38.78	363	28.1702	28.2455	27.805	28.6084	27.702	28.3456	27.8557	27.739	27.9356	28.2113	27.7574	27.7382	27.6101	28.1065	27.9232	27.7227	27.6413	27.7716	27.8674	27.8634	27.5575	27.5611	27.5348	27.6037	28.1702	28.2455	27.805	28.6084	27.702	28.3456	27.8557	27.739	27.9356	28.2113	27.7574	27.7382
Tb427_110037700	Tb427_110037700.1	http://tritrypdb.org/tritrypdb/processQuestion.do?questionFullName=GeneQuestions.GeneByLocusTag&questionSubmit=Get+Answer&ds_gene_ids_data=Tb427_110037700.1	Tb427_110037700	Tb427_110037700			3'-5' exonuclease/DNA polymerase family A, putative	35	35	35	25.2	182.82	1629	28.6621	28.462	28.5039	28.1891	28.979	28.831	28.9304	28.3518	29.0581	28.8699	28.6786	28.6911	29.0556	28.7812	28.7166	28.7937	28.6731	28.7133	28.7378	28.4606	28.3712	28.615	28.6859	27.8863	28.6621	28.462	28.5039	28.1891	28.979	28.831	28.9304	28.3518	29.0581	28.8699	28.6786	28.6911
Tb427_090075200	Tb427_090075200.1	http://tritrypdb.org/tritrypdb/processQuestion.do?questionFullName=GeneQuestions.GeneByLocusTag&questionSubmit=Get+Answer&ds_gene_ids_data=Tb427_090075200.1	Tb427_090075200	Tb427_090075200			3'-5' exonuclease/Zinc knuckle, putative	8	8	8	24.4	42.952	390	26.8055	26.3792	26.5975	26.5761	26.2918	26.3653	26.6061		26.9598	26.6655	26.1997		26.1816	26.4031	26.6502	26.7773	26.2167	26.9657		26.5728	27.0978	26.6628	26.3811	26.4627	26.8055	26.3792	26.5975	26.5761	26.2918	26.3653	26.6061	25.018	26.9598	26.6655	26.1997	24.2785
Tb427_030031300	Tb427_030031300.1	http://tritrypdb.org/tritrypdb/processQuestion.do?questionFullName=GeneQuestions.GeneByLocusTag&questionSubmit=Get+Answer&ds_gene_ids_data=Tb427_030031300.1	Tb427_030031300	Tb427_030031300			3'5'-cyclic nucleotide phosphodiesterase, putative	3	3	3	4	100.44	908	23.9681	24.226			24.1426	25.4062	24.5169				24.2973														23.9681	24.226	24.6771	25.1003	24.1426	25.4062	24.5169	24.8659	24.6197	24.2583	24.2973	25.0087
Tb427_040043300	Tb427_040043300.1	http://tritrypdb.org/tritrypdb/processQuestion.do?questionFullName=GeneQuestions.GeneByLocusTag&questionSubmit=Get+Answer&ds_gene_ids_data=Tb427_040043300.1	Tb427_040043300	Tb427_040043300			3'5'-cyclic nucleotide phosphodiesterase, putative	17	17	17	25.7	104.09	943	27.4791	27.0182	27.2014	26.7178	27.3583	27.2854	27.2651	26.7912	26.6415	27.072	27.4765	27.197	27.7639	27.2039	27.0718	26.5345	26.4665	26.8448	27.1062	26.6637		26.9552	27.1843	26.6393	27.4791	27.0182	27.2014	26.7178	27.3583	27.2854	27.2651	26.7912	26.6415	27.072	27.4765	27.197
Tb427_090038400	Tb427_090038400.1	http://tritrypdb.org/tritrypdb/processQuestion.do?questionFullName=GeneQuestions.GeneByLocusTag&questionSubmit=Get+Answer&ds_gene_ids_data=Tb427_090038400.1	Tb427_090038400	Tb427_090038400			3'5'-cyclic nucleotide phosphodiesterase, putative	16	16	16	35.8	72.831	651	28.4578	28.0304	27.5589	27.6794	28.244	27.7045	27.7651	27.5216	27.9748	27.9925	27.6455	27.586	28.3913	27.8516	27.6467	27.5787	27.8452	27.7648	27.8602	27.703	27.9247	27.6642	27.9087	28.114	28.4578	28.0304	27.5589	27.6794	28.244	27.7045	27.7651	27.5216	27.9748	27.9925	27.6455	27.586
Tb427_030034000	Tb427_030034000.1	http://tritrypdb.org/tritrypdb/processQuestion.do?questionFullName=GeneQuestions.GeneByLocusTag&questionSubmit=Get+Answer&ds_gene_ids_data=Tb427_030034000.1	Tb427_030034000	Tb427_030034000			3'5'-cyclic nucleotide phosphodiesterase, putative	4	4	4	8	76.591	676		25.5126	25.0696	25.4426										25.1104				24.9922							24.1812	25.5126	25.0696	25.4426	24.7894	24.1319	24.1179	24.308	24.8926	24.3791	24.2019	24.6202
Tb427_100137200	Tb427_100137200.1	http://tritrypdb.org/tritrypdb/processQuestion.do?questionFullName=GeneQuestions.GeneByLocusTag&questionSubmit=Get+Answer&ds_gene_ids_data=Tb427_100137200.1	Tb427_100137200	Tb427_100137200			3'5'-cyclic nucleotide phosphodiesterase, putative	14	14	14	33.5	70.409	620	27.5946	27.358	26.9044	26.8715	27.0992	26.941	26.9099		27.0658	27.1566	26.3172	26.5806	26.3053	26.6043	26.0102	26.1905	26.9787	26.0274	25.6331	25.7889	25.7807	26.0876			27.5946	27.358	26.9044	26.8715	27.0992	26.941	26.9099	24.6236	27.0658	27.1566	26.3172	26.5806
Tb427_070052700	Tb427_070052700.1	http://tritrypdb.org/tritrypdb/processQuestion.do?questionFullName=GeneQuestions.GeneByLocusTag&questionSubmit=Get+Answer&ds_gene_ids_data=Tb427_070052700.1	Tb427_070052700	Tb427_070052700	Tb927.7.4710:mRNA-p1	Tb927.7.4710:mRNA-p1	39S mitochondrial ribosomal protein L46, putative	10	10	10	43.9	33.936	296	28.6213	28.7388	28.3086	28.2802	28.495	28.6603	28.501	28.6271	28.2906	28.3713	28.3548	28.3096	28.3374	28.6368	28.6419	28.6484	28.3217	28.6601	28.8499	28.7247	28.5923	28.6919	28.7063	28.9661	28.6213	28.7388	28.3086	28.2802	28.495	28.6603	28.501	28.6271	28.2906	28.3713	28.3548	28.3096
Tb427_100144000	Tb427_100144000.1	http://tritrypdb.org/tritrypdb/processQuestion.do?questionFullName=GeneQuestions.GeneByLocusTag&questionSubmit=Get+Answer&ds_gene_ids_data=Tb427_100144000.1	Tb427_100144000	Tb427_100144000	Tb927.10.13620:mRNA-p1	Tb927.10.13620:mRNA-p1	3-beta hydroxysteroid dehydrogenase/isomerase family, putative	12	12	12	31.5	54.803	485	27.5051	26.767	27.8164	26.9915	27.919	27.9697	28.0279	27.766	27.8544	27.6481	27.7197	27.7496	27.813	27.5131	27.7165	27.6146	27.7889	26.9138	27.3393	27.1683	26.6224	26.7261	26.6914		27.5051	26.767	27.8164	26.9915	27.919	27.9697	28.0279	27.766	27.8544	27.6481	27.7197	27.7496
Tb427_030018100	Tb427_030018100.1	http://tritrypdb.org/tritrypdb/processQuestion.do?questionFullName=GeneQuestions.GeneByLocusTag&questionSubmit=Get+Answer&ds_gene_ids_data=Tb427_030018100.1	Tb427_030018100	Tb427_030018100	Tb927.3.1840:mRNA-p1	Tb927.3.1840:mRNA-p1	3-oxo-5-alpha-steroid 4-dehydrogenase, putative	22	22	22	53	33.355	298	32.7293	32.4978	32.7812	32.5248	32.8364	32.7311	32.797	33.3354	33.3216	32.534	32.8494	33.0627	32.8669	32.7821	32.8464	32.9835	32.7391	33.3247	32.9599	32.813	33.1234	33.2532	33.1428	32.8015	32.7293	32.4978	32.7812	32.5248	32.8364	32.7311	32.797	33.3354	33.3216	32.534	32.8494	33.0627
Tb427_090032400	Tb427_090032400.1	http://tritrypdb.org/tritrypdb/processQuestion.do?questionFullName=GeneQuestions.GeneByLocusTag&questionSubmit=Get+Answer&ds_gene_ids_data=Tb427_090032400.1	Tb427_090032400	Tb427_090032400	Tb927.9.5960:mRNA-p1	Tb927.9.5960:mRNA-p1	4Fe-4S dicluster domain containing protein, putative	14	14	14	83.5	21.281	188	30.9311	31.5368	30.4993	30.5092	31.5052	32.2735	31.7577	31.3087	31.5819	32.1367	31.8082	32.1079	31.8199	32.6229	32.2181	32.1782	32.1091	32.4816	32.9357	32.2307	32.584	32.6678	33.128	32.2898	30.9311	31.5368	30.4993	30.5092	31.5052	32.2735	31.7577	31.3087	31.5819	32.1367	31.8082	32.1079
Tb427_090051400	Tb427_090051400.1	http://tritrypdb.org/tritrypdb/processQuestion.do?questionFullName=GeneQuestions.GeneByLocusTag&questionSubmit=Get+Answer&ds_gene_ids_data=Tb427_090051400.1	Tb427_090051400	Tb427_090051400	Tb927.9.9150:mRNA-p1	Tb927.9.9150:mRNA-p1;Tb927.11.2640:mRNA-p1;Tb927.7.580:mRNA-p1;Tb927.7.7450:mRNA-p1	50S ribosome-binding GTPase, putative	8	8	8	23.3	50.325	451	27.6818	27.3734	27.0783		27.3236	27.0247	27.445	26.9865	27.088	27.4669	27.0623	26.8751	27.3284	27.324	26.9306	26.8226	26.5753	26.6382	26.8926	26.6317	26.7218	26.7577	26.8467	26.0358	27.6818	27.3734	27.0783	25.0594	27.3236	27.0247	27.445	26.9865	27.088	27.4669	27.0623	26.8751
Tb427_070009200	Tb427_070009200.1	http://tritrypdb.org/tritrypdb/processQuestion.do?questionFullName=GeneQuestions.GeneByLocusTag&questionSubmit=Get+Answer&ds_gene_ids_data=Tb427_070009200.1	Tb427_070009200	Tb427_070009200	Tb927.7.580:mRNA-p1	Tb927.7.580:mRNA-p1;Tb927.5.4310:mRNA-p1;Tb927.7.7450:mRNA-p1;Tb927.11.2640:mRNA-p1;Tb927.9.9150:mRNA-p1;Tb927.7.2630:mRNA-p1	50S ribosome-binding GTPase, putative	18	18	18	30.8	76.886	682	29.966	30.1808	29.9285	29.8208	29.811	30.1769	30.0932	29.7771	29.8144	29.9905	29.6635	29.7643	29.6626	29.8317	29.6697	29.7694	29.2531	28.8928	29.0226	29.3662	28.7575	29.0716	28.9678	28.7239	29.966	30.1808	29.9285	29.8208	29.811	30.1769	30.0932	29.7771	29.8144	29.9905	29.6635	29.7643
Tb427_060028400	Tb427_060028400.1;Tb427_060027800.1;Tb427_060027200.1;Tb427_060028000.1;Tb427_060027400.1	http://tritrypdb.org/tritrypdb/processQuestion.do?questionFullName=GeneQuestions.GeneByLocusTag&questionSubmit=Get+Answer&ds_gene_ids_data=Tb427_060028400.1,Tb427_060027800.1,Tb427_060027200.1,Tb427_060028000.1,Tb427_060027400.1	Tb427_060028400;Tb427_060027800;Tb427_060027200;Tb427_060028000;Tb427_060027400	Tb427_060028400	Tb927.6.2290:mRNA-p1;Tb927.6.2310:mRNA-p1	Tb927.6.2290:mRNA-p1;Tb927.6.2350:mRNA-p1;Tb927.6.2310:mRNA-p1	50S ribosome-binding GTPase, putative	10	10	10	14.8	103.34	924	25.5868	25.6421	24.8903		25.175	25.1967	25.2189			25.5545	25.1768		25.722	25.1868			25.0275	25.5655	25.4624		25.2159	25.3565	25.6773		25.5868	25.6421	24.8903	24.9135	25.175	25.1967	25.2189	25.0846	24.4132	25.5545	25.1768	24.5365
Tb427_080031000	Tb427_080031000.1	http://tritrypdb.org/tritrypdb/processQuestion.do?questionFullName=GeneQuestions.GeneByLocusTag&questionSubmit=Get+Answer&ds_gene_ids_data=Tb427_080031000.1	Tb427_080031000	Tb427_080031000	Tb927.8.2760:mRNA-p1	Tb927.8.2760:mRNA-p1;Tb927.7.2630:mRNA-p1;Tb11.v5.0405.1-p1;Tb927.11.16990:mRNA-p1	50S ribosome-binding GTPase, putative	2	2	2	4	52.159	477	24.877					24.2676			25.747		23.598				25.4677										24.877	24.1449	24.7289	25.2025	24.5201	24.2676	24.2691	24.2476	25.747	24.7644	23.598	24.3605
Tb427_080087000	Tb427_080087000.1	http://tritrypdb.org/tritrypdb/processQuestion.do?questionFullName=GeneQuestions.GeneByLocusTag&questionSubmit=Get+Answer&ds_gene_ids_data=Tb427_080087000.1	Tb427_080087000	Tb427_080087000	Tb927.8.8140:mRNA-p1	Tb927.8.8140:mRNA-p1;Tb927.4.4220:mRNA-p1;Tb927.8.4620:mRNA-p1;Tb927.8.4610:mRNA-p1;Tb927.2.2130:mRNA-p1;Tb927.11.4570:mRNA-p1;Tb927.6.3040:mRNA-p1;Tb927.3.1120:mRNA-p1;Tb927.11.13750:mRNA-p1;Tb927.10.8560:mRNA-p1;Tb927.9.11000:mRNA-p1;Tb09.v4.0017:mRNA-p1;Tb927.8.4330:mRNA-p1;Tb927.9.15930:mRNA-p1;Tb927.11.15240:mRNA-p1;Tb927.8.890:mRNA-p1;Tb927.11.12950:mRNA-p1;Tb927.10.12960:mRNA-p1;Tb927.8.47…	50S ribosome-binding GTPase/ADP-ribosylation factor family/Ras of Complex, Roc, domain of DAPkinase/Ras family/Gtr1/RagA G protein conserved region containing protein, putative	9	9	9	16.9	68.457	634		25.4236	25.1216		26.0076	25.9716	25.7641		26.5423	26.4533	26.6484	25.9484	26.6678	27.1142	26.8309	26.0989	26.361	27.4136	26.875	27.3077	27.5497	27.0279	27.8046	28.5436	24.3535	25.4236	25.1216	24.6096	26.0076	25.9716	25.7641	24.339	26.5423	26.4533	26.6484	25.9484
Tb427_030050600	Tb427_030050600.1	http://tritrypdb.org/tritrypdb/processQuestion.do?questionFullName=GeneQuestions.GeneByLocusTag&questionSubmit=Get+Answer&ds_gene_ids_data=Tb427_030050600.1	Tb427_030050600	Tb427_030050600	Tb927.3.4720:mRNA-p1	Tb927.3.4720:mRNA-p1;Tb927.3.4760:mRNA-p1	50S ribosome-binding GTPase/Dynamin family/Dynamin central region/Dynamin GTPase effector domain containing protein, putative	43	7	7	76.7	73.335	660	26.5375	26.0213			27.1789	26.8648	27.0192		27.2725	26.7679	26.9604	26.4676	27.7738	27.215	26.9362	27.0501	27.8005	26.4497	27.3742	27.4749	27.506	26.7951	27.612	28.5716	26.5375	26.0213	24.5714	25.0657	27.1789	26.8648	27.0192	24.8455	27.2725	26.7679	26.9604	26.4676
Tb427_030051000	Tb427_030051000.1	http://tritrypdb.org/tritrypdb/processQuestion.do?questionFullName=GeneQuestions.GeneByLocusTag&questionSubmit=Get+Answer&ds_gene_ids_data=Tb427_030051000.1	Tb427_030051000	Tb427_030051000	Tb927.3.4760:mRNA-p1	Tb927.3.4760:mRNA-p1;Tb927.3.4720:mRNA-p1	50S ribosome-binding GTPase/Dynamin family/Dynamin central region/Dynamin GTPase effector domain containing protein, putative	45	45	9	79.5	73.162	660	33.1919	33.1775	33.3165	32.9872	33.3869	33.3347	33.4759	33.1613	33.4025	33.3055	33.272	33.1059	33.167	33.3641	33.2512	33.1462	33.1883	32.8318	32.7725	33.129	32.7711	32.9401	32.7751	32.876	33.1919	33.1775	33.3165	32.9872	33.3869	33.3347	33.4759	33.1613	33.4025	33.3055	33.272	33.1059
Tb427_100072500	Tb427_100072500.1	http://tritrypdb.org/tritrypdb/processQuestion.do?questionFullName=GeneQuestions.GeneByLocusTag&questionSubmit=Get+Answer&ds_gene_ids_data=Tb427_100072500.1	Tb427_100072500	Tb427_100072500	Tb927.10.6800:mRNA-p1	Tb927.10.6800:mRNA-p1;Tb927.9.9020:mRNA-p1;Tb927.10.7430:mRNA-p1;Tb927.11.3120:mRNA-p1;Tb927.2.4240:mRNA-p1	50S ribosome-binding GTPase/Ferrous iron transport protein B/C-terminal region of MMR_HSR1 domain/TGS domain containing protein, putative	26	26	26	73.9	41.267	368	31.1548	31.1077	30.8791	30.9852	30.9629	30.862	30.8867	30.9399	31.0671	30.7747	30.7966	30.8281	30.8981	30.7604	30.7723	30.9411	30.5314	30.3933	30.5345	30.7534	30.3044	30.3115	30.5149	30.824	31.1548	31.1077	30.8791	30.9852	30.9629	30.862	30.8867	30.9399	31.0671	30.7747	30.7966	30.8281
Tb427_020019700	Tb427_020019700.1	http://tritrypdb.org/tritrypdb/processQuestion.do?questionFullName=GeneQuestions.GeneByLocusTag&questionSubmit=Get+Answer&ds_gene_ids_data=Tb427_020019700.1	Tb427_020019700	Tb427_020019700	Tb927.2.4240:mRNA-p1	Tb927.2.4240:mRNA-p1;Tb927.2.5060:mRNA-p1;Tb927.11.16910:mRNA-p1;Tb927.10.6800:mRNA-p1;Tb11.v5.0491.1-p1;Tb927.9.9020:mRNA-p1	50S ribosome-binding GTPase/Ferrous iron transport protein B/Protein of unknown function (DUF933), putative	19	19	19	61	40.725	367	30.2679	30.3642	30.1246	30.0789	29.982	30.1757	30.1094	29.9732	29.9093	30.1171	29.8594	29.9881	30.1241	30.0884	29.8488	30.2181	29.8902	30.1897	30.1105	30.097	29.8626	30.1521	30.2512	30.1647	30.2679	30.3642	30.1246	30.0789	29.982	30.1757	30.1094	29.9732	29.9093	30.1171	29.8594	29.9881
Tb427_020025500	Tb427_020025500.1	http://tritrypdb.org/tritrypdb/processQuestion.do?questionFullName=GeneQuestions.GeneByLocusTag&questionSubmit=Get+Answer&ds_gene_ids_data=Tb427_020025500.1	Tb427_020025500	Tb427_020025500	Tb927.2.5060:mRNA-p1	Tb927.2.5060:mRNA-p1;Tb927.2.4240:mRNA-p1;Tb927.11.16910:mRNA-p1	50S ribosome-binding GTPase/Protein of unknown function (DUF933), putative	28	28	28	79.9	44.335	394	32.8256	32.6809	32.4501	32.6696	32.186	32.5	32.3566	32.3296	32.4027	32.131	32.2179	32.1373	32.2028	32.1177	32.0745	32.1405	32.075	31.648	31.6943	31.633	31.5103	31.5819	31.5651	31.3564	32.8256	32.6809	32.4501	32.6696	32.186	32.5	32.3566	32.3296	32.4027	32.131	32.2179	32.1373
Tb427_100006800	Tb427_100006800.1	http://tritrypdb.org/tritrypdb/processQuestion.do?questionFullName=GeneQuestions.GeneByLocusTag&questionSubmit=Get+Answer&ds_gene_ids_data=Tb427_100006800.1	Tb427_100006800	Tb427_100006800			5'-3' exonuclease, N-terminal resolvase-like domain/5'-3' exonuclease, C-terminal SAM fold, putative	7	7	7	29.2	33.567	295	26.3273	26.2801	25.888	26.1436	26.6788	26.8915	26.0969	26.3078	26.4726	26.0813	25.9575	25.9418	26.7115	26.3921	26.7595		26.8837	26.4547	26.5019	26.2715	26.4414	26.4799	26.4542		26.3273	26.2801	25.888	26.1436	26.6788	26.8915	26.0969	26.3078	26.4726	26.0813	25.9575	25.9418
Tb427_080034500	Tb427_080034500.1	http://tritrypdb.org/tritrypdb/processQuestion.do?questionFullName=GeneQuestions.GeneByLocusTag&questionSubmit=Get+Answer&ds_gene_ids_data=Tb427_080034500.1	Tb427_080034500	Tb427_080034500	Tb927.8.2990:mRNA-p1	Tb927.8.2990:mRNA-p1	5-formyltetrahydrofolate cyclo-ligase family, putative	2	2	2	9.1	35.655	320																	25.4155	25.3801	25.508		25.4338		25.5928		24.8128	24.6119	24.8292	24.6768	24.1758	24.3828	24.7558	25.2192	24.7873	24.734	23.8662	24.6232
Tb427_050024500	Tb427_050024500.1	http://tritrypdb.org/tritrypdb/processQuestion.do?questionFullName=GeneQuestions.GeneByLocusTag&questionSubmit=Get+Answer&ds_gene_ids_data=Tb427_050024500.1	Tb427_050024500	Tb427_050024500	Tb927.5.1820:mRNA-p1	Tb927.5.1820:mRNA-p1	60s Acidic ribosomal protein, putative	2	2	2	34.6	10.132	107				30.4562				30.3816	29.8806		28.9978	28.8909			29.3185	28.8706	29.6346	28.8833		29.0402			28.844		24.5964	24.4324	24.6118	30.4562	24.4924	24.7361	24.4788	30.3816	29.8806	24.8647	28.9978	28.8909
Tb427_060056300	Tb427_060056300.1;Tb427_060056200.1	http://tritrypdb.org/tritrypdb/processQuestion.do?questionFullName=GeneQuestions.GeneByLocusTag&questionSubmit=Get+Answer&ds_gene_ids_data=Tb427_060056300.1,Tb427_060056200.1	Tb427_060056300;Tb427_060056200	Tb427_060056300	Tb927.6.5120:mRNA-p1	Tb927.6.5120:mRNA-p1;Tb927.6.5130:mRNA-p1	60s Acidic ribosomal protein, putative	7	7	7	52.3	10.444	107	30.1751	29.451	29.9716	29.8009	29.518	29.6841	29.3111	30.5359	30.2514	29.566	29.8026	28.5701	29.2196	28.8308	29.2511	28.6638	29.8048	28.2672	28.4289	27.4765	28.6958	27.793	29.1084	27.5413	30.1751	29.451	29.9716	29.8009	29.518	29.6841	29.3111	30.5359	30.2514	29.566	29.8026	28.5701
Tb427_100038700	Tb427_100038700.1;Tb427_100038600.1	http://tritrypdb.org/tritrypdb/processQuestion.do?questionFullName=GeneQuestions.GeneByLocusTag&questionSubmit=Get+Answer&ds_gene_ids_data=Tb427_100038700.1,Tb427_100038600.1	Tb427_100038700;Tb427_100038600	Tb427_100038700	Tb927.10.3370:mRNA-p1	Tb927.10.3370:mRNA-p1;Tb927.10.3380:mRNA-p1	60s Acidic ribosomal protein, putative	4	4	4	49.1	11.535	114	30.124	29.9908	29.3355	29.2519	29.395	29.6913	29.9754	29.241	29.4091	29.1176	29.1048	29.0505	29.0963	29.4976	29.2303	29.6394	28.6741	28.4104		29.2992	28.0979		28.67	27.5301	30.124	29.9908	29.3355	29.2519	29.395	29.6913	29.9754	29.241	29.4091	29.1176	29.1048	29.0505
Tb427_090031400	Tb427_090031400.1	http://tritrypdb.org/tritrypdb/processQuestion.do?questionFullName=GeneQuestions.GeneByLocusTag&questionSubmit=Get+Answer&ds_gene_ids_data=Tb427_090031400.1	Tb427_090031400	Tb427_090031400	Tb927.9.5690:mRNA-p1	Tb927.9.5690:mRNA-p1;Tb927.6.5120:mRNA-p1;Tb927.6.5130:mRNA-p1	60s Acidic ribosomal protein, putative	8	8	8	81.4	11.09	113	32.5918	32.9555	32.6372	33.0892	32.3988	32.5533	32.4633	32.4322	32.0704	32.052	32.1743	31.985	31.9572	32.0726	31.7715	31.9655	31.9197	31.7157	31.6179	31.5401	31.1654	31.4725	31.436	30.6572	32.5918	32.9555	32.6372	33.0892	32.3988	32.5533	32.4633	32.4322	32.0704	32.052	32.1743	31.985
Tb427_080010400	Tb427_080010400.1	http://tritrypdb.org/tritrypdb/processQuestion.do?questionFullName=GeneQuestions.GeneByLocusTag&questionSubmit=Get+Answer&ds_gene_ids_data=Tb427_080010400.1	Tb427_080010400	Tb427_080010400	Tb927.8.1020:mRNA-p1	Tb927.8.1020:mRNA-p1;Tb927.10.4520:mRNA-p1;Tb927.7.1610:mRNA-p1;Tb927.3.2710:mRNA-p1	6-phosphofructo-2-kinase/Histidine phosphatase superfamily (branch 1), putative	7	7	7	9.8	78.89	702	25.5782	25.95	25.7652	25.9453	26.3468	26.3392	26.0353	26.5304	26.4037	26.8564	26.5901	25.9966	26.4657	27.2373	27.3652	26.6454	27.0061	27.222	27.0697	27.2278	27.2076	26.1841	27.068	27.7137	25.5782	25.95	25.7652	25.9453	26.3468	26.3392	26.0353	26.5304	26.4037	26.8564	26.5901	25.9966
Tb427_100095300	Tb427_100095300.1	http://tritrypdb.org/tritrypdb/processQuestion.do?questionFullName=GeneQuestions.GeneByLocusTag&questionSubmit=Get+Answer&ds_gene_ids_data=Tb427_100095300.1	Tb427_100095300	Tb427_100095300	Tb927.10.8850:mRNA-p1	Tb927.10.8850:mRNA-p1	A distinct subfamily of CDD/CDA-like deaminases, putative	16	16	16	30.8	66.195	588	28.8425	28.65	28.6157	28.5765	28.9905	28.7248	28.6086	28.4564	29.1078	28.4638	28.7915	28.7564	28.769	28.633	28.5725	28.8138	28.7216	28.6071	28.3037	28.1552	28.1777	28.3565	28.6959	27.8601	28.8425	28.65	28.6157	28.5765	28.9905	28.7248	28.6086	28.4564	29.1078	28.4638	28.7915	28.7564
Tb427_050041600	Tb427_050041600.1	http://tritrypdb.org/tritrypdb/processQuestion.do?questionFullName=GeneQuestions.GeneByLocusTag&questionSubmit=Get+Answer&ds_gene_ids_data=Tb427_050041600.1	Tb427_050041600	Tb427_050041600	Tb927.5.3510:mRNA-p1	Tb927.5.3510:mRNA-p1;Tb927.10.10340:mRNA-p1;Tb927.9.11850:mRNA-p1;Tb927.10.740:mRNA-p1;Tb11.v5.0811.1-p1;Tb11.v5.0749.1-p1	AAA ATPase domain/RecF/RecN/SMC N terminal domain/AAA domain/SMC proteins Flexible Hinge Domain, putative	44	44	44	38.3	136.44	1199	29.976	29.9231	29.9567	29.9676	29.9632	29.9217	29.8008	29.9351	30.0482	29.8392	29.9018	29.8252	30.0359	29.9993	30.1627	30.0729	30.0756	30.3083	30.0816	29.9074	30.1223	30.2076	29.9621	30.2459	29.976	29.9231	29.9567	29.9676	29.9632	29.9217	29.8008	29.9351	30.0482	29.8392	29.9018	29.8252
Tb427_090068200	Tb427_090068200.1	http://tritrypdb.org/tritrypdb/processQuestion.do?questionFullName=GeneQuestions.GeneByLocusTag&questionSubmit=Get+Answer&ds_gene_ids_data=Tb427_090068200.1	Tb427_090068200	Tb427_090068200	Tb927.9.11850:mRNA-p1	Tb927.9.11850:mRNA-p1;Tb927.10.740:mRNA-p1;Tb927.5.3510:mRNA-p1;Tb927.10.10340:mRNA-p1;Tb11.v5.0749.1-p1;Tb11.v5.0811.1-p1	AAA ATPase domain/RecF/RecN/SMC N terminal domain/P-loop containing region of AAA domain/AAA domain/AAA domain, putative AbiEii toxin, Type IV TA system/SMC proteins Flexible Hinge Domain, putative	53	53	53	43	144.54	1275	30.3465	30.3198	30.2841	30.3126	30.2261	30.6063	30.3719	30.4238	30.2958	30.3984	30.6803	30.475	30.4355	30.6576	30.7189	30.6559	30.4962	30.9232	30.7114	30.7462	30.633	30.906	30.6959	30.7785	30.3465	30.3198	30.2841	30.3126	30.2261	30.6063	30.3719	30.4238	30.2958	30.3984	30.6803	30.475
Tb427_100010600	Tb427_100010600.1	http://tritrypdb.org/tritrypdb/processQuestion.do?questionFullName=GeneQuestions.GeneByLocusTag&questionSubmit=Get+Answer&ds_gene_ids_data=Tb427_100010600.1	Tb427_100010600	Tb427_100010600	Tb927.10.740:mRNA-p1	Tb927.10.740:mRNA-p1;Tb11.v5.0749.1-p1;Tb11.v5.0750.1-p1;Tb927.9.11850:mRNA-p1;Tb927.10.10340:mRNA-p1;Tb927.5.3510:mRNA-p1;Tb11.v5.0811.1-p1	AAA ATPase domain/RecF/RecN/SMC N terminal domain/SMC proteins Flexible Hinge Domain, putative	22	22	22	17.8	154.8	1366	28.1254	27.9065	28.1665	28.4971	28.0335	28.4305	28.4058	28.2006	28.3909	28.3983	28.074	28.2779	28.2381	28.31	28.2907	28.2616	28.4729	28.0578	27.6816	28.1518	27.9235	28.139	27.9242	27.7881	28.1254	27.9065	28.1665	28.4971	28.0335	28.4305	28.4058	28.2006	28.3909	28.3983	28.074	28.2779
Tb427_060035400	Tb427_060035400.1	http://tritrypdb.org/tritrypdb/processQuestion.do?questionFullName=GeneQuestions.GeneByLocusTag&questionSubmit=Get+Answer&ds_gene_ids_data=Tb427_060035400.1	Tb427_060035400	Tb427_060035400	Tb927.6.3030:mRNA-p1	Tb927.6.3030:mRNA-p1;Tb927.2.3030:mRNA-p1;Tb927.2.5980:mRNA-p1	AAA domain (Cdc48 subfamily)/AAA domain (dynein-related subfamily), putative	14	14	14	23.6	92.431	828	28.2617	28.1159	27.9812	27.8351	28.3586	28.0711	28.1708	28.063	28.2344	28.3444	27.7925	27.8137	28.5958	28.4099	28.1723	28.1129	28.1542	28.5021	28.2347	27.8632	28.2258	28.0375	28.1961	27.974	28.2617	28.1159	27.9812	27.8351	28.3586	28.0711	28.1708	28.063	28.2344	28.3444	27.7925	27.8137
Tb427_110068500	Tb427_110068500.1	http://tritrypdb.org/tritrypdb/processQuestion.do?questionFullName=GeneQuestions.GeneByLocusTag&questionSubmit=Get+Answer&ds_gene_ids_data=Tb427_110068500.1	Tb427_110068500	Tb427_110068500	Tb927.11.6350:mRNA-p1	Tb927.11.6350:mRNA-p1;Tb927.10.5770:mRNA-p1;Tb927.5.3920:mRNA-p1;Tb927.7.2500:mRNA-p1;Tb927.10.3520:mRNA-p1;Tb927.10.9740:mRNA-p1;Tb927.6.1090:mRNA-p1;Tb927.11.3740:mRNA-p1;Tb927.11.1660:mRNA-p1;Tb927.7.2550:mRNA-p1;Tb927.5.1870:mRNA-p1;Tb927.6.3790:mRNA-p1;Tb927.11.960:mRNA-p1;Tb927.10.1210:mRNA-p1;Tb927.11.8350:mRNA-p1;Tb927.3.1440:mRNA-p1;Tb927.5.960:mRNA-p1;Tb927.4.1250:mRNA-p1;Tb927.3.3280:m…	AAA domain (Cdc48 subfamily)/ATPase family associated with various cellular activities (AAA)/AAA+ lid domain containing protein, putative	29	29	29	27.7	141.23	1271	29.0147	28.5134	28.7865	28.7728	28.8739	28.4184	28.4219	28.3499	28.75	28.7755	28.5799	28.5797	28.827	28.7705	28.642	28.5841	28.541	29.0073	28.8887	28.4475	28.4461	28.5132	28.5066	28.3225	29.0147	28.5134	28.7865	28.7728	28.8739	28.4184	28.4219	28.3499	28.75	28.7755	28.5799	28.5797
Tb427_050035400	Tb427_050035400.1	http://tritrypdb.org/tritrypdb/processQuestion.do?questionFullName=GeneQuestions.GeneByLocusTag&questionSubmit=Get+Answer&ds_gene_ids_data=Tb427_050035400.1	Tb427_050035400	Tb427_050035400	Tb927.5.2890.1:mRNA-p1	Tb927.5.2890.1:mRNA-p1;Tb927.5.2890.2:mRNA-p1;Tb11.v5.0419.1-p1;Tb927.1.880:mRNA-p1	AAA domain (dynein-related subfamily), putative	38	38	38	20.5	240.66	2197	29.5044	29.6005	29.7066	29.7654	29.3942	29.4234	29.4449	29.4639	29.2624	29.2256	28.9915	29.0696	28.9463	28.992	29.2125	29.2436	28.9986	29.0103	28.7303	28.8508	28.8156	28.7956	28.5702	28.0996	29.5044	29.6005	29.7066	29.7654	29.3942	29.4234	29.4449	29.4639	29.2624	29.2256	28.9915	29.0696
Tb427_070029500	Tb427_070029500.1	http://tritrypdb.org/tritrypdb/processQuestion.do?questionFullName=GeneQuestions.GeneByLocusTag&questionSubmit=Get+Answer&ds_gene_ids_data=Tb427_070029500.1	Tb427_070029500	Tb427_070029500	Tb927.7.2500:mRNA-p1	Tb927.7.2500:mRNA-p1;Tb927.10.3520:mRNA-p1;Tb927.10.9740:mRNA-p1;Tb927.11.3740:mRNA-p1;Tb927.7.2550:mRNA-p1;Tb927.6.1090:mRNA-p1;Tb927.10.5770:mRNA-p1;Tb927.10.7620:mRNA-p1;Tb927.11.1660:mRNA-p1;Tb927.4.3300:mRNA-p1;Tb927.5.3920:mRNA-p1;Tb927.11.6350:mRNA-p1;Tb927.10.1210:mRNA-p1;Tb927.4.4210:mRNA-p1;Tb927.10.16150:mRNA-p1;Tb11.v5.0397.1-p1;Tb927.6.3790:mRNA-p1;Tb927.10.13510:mRNA-p1;Tb927.5.1870…	AAA domain (dynein-related subfamily)/AAA domain (Cdc48 subfamily)/ATPase family associated with various cellular activities (AAA)/AAA+ lid domain containing protein, putative	28	25	25	63.4	48.475	437	31.2429	31.3681	31.2836	31.004	31.4668	31.3465	31.4509	31.0743	31.3412	31.4018	31.4629	31.1483	31.5634	31.5378	31.6037	31.3845	31.5753	31.5246	31.2069	31.5402	31.3842	31.4148	31.1533	31.33	31.2429	31.3681	31.2836	31.004	31.4668	31.3465	31.4509	31.0743	31.3412	31.4018	31.4629	31.1483
Tb427_110139000	Tb427_110139000.1	http://tritrypdb.org/tritrypdb/processQuestion.do?questionFullName=GeneQuestions.GeneByLocusTag&questionSubmit=Get+Answer&ds_gene_ids_data=Tb427_110139000.1	Tb427_110139000	Tb427_110139000	Tb927.11.12230:mRNA-p1	Tb927.11.12230:mRNA-p1;Tb927.5.1520:mRNA-p1;Tb927.4.3300:mRNA-p1	AAA domain (dynein-related subfamily)/AAA domain (Cdc48 subfamily)/ATPase family associated with various cellular activities (AAA)/C-terminal, D2-small domain, of ClpB protein, putative	32	32	32	54.2	54.875	496	30.79	30.5154	30.577	30.5489	30.7454	30.7923	30.78	30.7359	30.8389	30.9093	30.813	30.7639	30.9584	31.0185	30.9181	30.8615	31.1925	31.2173	31.0858	31.0977	31.0286	30.953	30.9808	30.994	30.79	30.5154	30.577	30.5489	30.7454	30.7923	30.78	30.7359	30.8389	30.9093	30.813	30.7639
Tb427_050021000	Tb427_050021000.1	http://tritrypdb.org/tritrypdb/processQuestion.do?questionFullName=GeneQuestions.GeneByLocusTag&questionSubmit=Get+Answer&ds_gene_ids_data=Tb427_050021000.1	Tb427_050021000	Tb427_050021000	Tb927.5.1520:mRNA-p1	Tb927.5.1520:mRNA-p1;Tb927.11.12230:mRNA-p1;Tb927.4.3300:mRNA-p1;Tb927.10.3520:mRNA-p1	AAA domain (dynein-related subfamily)/AAA domain (Cdc48 subfamily)/ATPase family associated with various cellular activities (AAA)/C-terminal, D2-small domain, of ClpB protein, putative	31	31	31	62.9	52.53	475	32.0806	32.0218	32.0058	31.8672	32.1018	32.0147	32.1327	31.9162	32.0935	32.0591	31.9297	31.9923	32.2254	32.3082	32.157	32.0638	32.0294	32.3022	32.1063	32.2821	32.3379	32.3352	32.4009	32.341	32.0806	32.0218	32.0058	31.8672	32.1018	32.0147	32.1327	31.9162	32.0935	32.0591	31.9297	31.9923
Tb427_110054500	Tb427_110054500.1	http://tritrypdb.org/tritrypdb/processQuestion.do?questionFullName=GeneQuestions.GeneByLocusTag&questionSubmit=Get+Answer&ds_gene_ids_data=Tb427_110054500.1	Tb427_110054500	Tb427_110054500	Tb927.11.4940:mRNA-p1	Tb927.11.4940:mRNA-p1;Tb927.11.8730:mRNA-p1;Tb927.11.960:mRNA-p1;Tb927.10.9740:mRNA-p1;Tb927.5.3920:mRNA-p1;Tb927.10.3520:mRNA-p1;Tb927.10.5770:mRNA-p1;Tb927.10.1210:mRNA-p1;Tb927.11.1660:mRNA-p1;Tb927.11.8350:mRNA-p1;Tb927.11.14730:mRNA-p1;Tb927.3.1440:mRNA-p1;Tb927.3.3280:mRNA-p1;Tb927.7.2500:mRNA-p1;Tb927.7.2550:mRNA-p1;Tb927.10.16150:mRNA-p1;Tb11.v5.0397.1-p1;Tb927.4.1400:mRNA-p1;Tb927.6.3790…	AAA domain (dynein-related subfamily)/ATPase family associated with various cellular activities (AAA), putative	11	11	11	25	56.837	523	25.926	26.0141	26.0522		25.8347	25.8985	26.0448		26.1703	25.8491			25.9774	26.0557	26.162			25.6333			25.7044	25.9292			25.926	26.0141	26.0522	24.7793	25.8347	25.8985	26.0448	24.841	26.1703	25.8491	24.816	24.2044
Tb427_100082300	Tb427_100082300.1	http://tritrypdb.org/tritrypdb/processQuestion.do?questionFullName=GeneQuestions.GeneByLocusTag&questionSubmit=Get+Answer&ds_gene_ids_data=Tb427_100082300.1	Tb427_100082300	Tb427_100082300	Tb927.10.7620:mRNA-p1	Tb927.10.7620:mRNA-p1;Tb927.4.4210:mRNA-p1;Tb927.11.14730:mRNA-p1;Tb927.4.3300:mRNA-p1;Tb927.10.13510:mRNA-p1;Tb927.10.16150:mRNA-p1;Tb11.v5.0397.1-p1;Tb927.7.2500:mRNA-p1;Tb927.10.3520:mRNA-p1;Tb927.10.9740:mRNA-p1;Tb927.11.1660:mRNA-p1;Tb927.6.1090:mRNA-p1;Tb927.10.5770:mRNA-p1;Tb927.7.2550:mRNA-p1;Tb927.11.3740:mRNA-p1;Tb927.6.3790:mRNA-p1;Tb927.11.960:mRNA-p1;Tb927.5.1870:mRNA-p1;Tb927.10.121…	AAA domain (dynein-related subfamily)/ATPase family associated with various cellular activities (AAA)/AAA+ lid domain/Peptidase family M41, putative	19	19	19	39	71.13	657	28.9964	28.6889	29.0612	28.778	28.9786	28.8872	28.7052	28.8063	28.9943	29.0954	28.8515	28.6824	28.8111	28.6859	28.6912	28.6216	28.505	28.6351	28.382	28.5861	28.0656	27.8873	28.1001	28.0459	28.9964	28.6889	29.0612	28.778	28.9786	28.8872	28.7052	28.8063	28.9943	29.0954	28.8515	28.6824
Tb427_060034400	Tb427_060034400.1	http://tritrypdb.org/tritrypdb/processQuestion.do?questionFullName=GeneQuestions.GeneByLocusTag&questionSubmit=Get+Answer&ds_gene_ids_data=Tb427_060034400.1	Tb427_060034400	Tb427_060034400	Tb927.6.2930:mRNA-p1	Tb927.6.2930:mRNA-p1;Tb927.7.2950:mRNA-p1;Tb927.10.2760:mRNA-p1;Tb927.11.11350:mRNA-p1;Tb927.8.3580:mRNA-p1;Tb927.6.1090:mRNA-p1;Tb927.10.9420:mRNA-p1;Tb927.10.9740:mRNA-p1	AAA domain (dynein-related subfamily)/Holliday junction DNA helicase RuvB P-loop domain/ATPase family associated with various cellular activities (AAA), putative	22	22	22	48.6	59.751	529	28.483	27.9771	27.9382	27.8614	28.2853	28.3643	28.1728	28.0571	28.4361	28.4463	28.1479	28.4995	28.6445	28.678	28.2032	28.4817	28.6139	28.9623	28.8528	28.6642	28.8089	29.1327	28.8607	28.8838	28.483	27.9771	27.9382	27.8614	28.2853	28.3643	28.1728	28.0571	28.4361	28.4463	28.1479	28.4995
Tb427_050025000	Tb427_050025000.1	http://tritrypdb.org/tritrypdb/processQuestion.do?questionFullName=GeneQuestions.GeneByLocusTag&questionSubmit=Get+Answer&ds_gene_ids_data=Tb427_050025000.1	Tb427_050025000	Tb427_050025000	Tb927.5.1870:mRNA-p1	Tb927.5.1870:mRNA-p1;Tb927.10.1210:mRNA-p1;Tb927.3.1440:mRNA-p1;Tb927.11.8350:mRNA-p1;Tb927.3.3280:mRNA-p1;Tb927.11.3870:mRNA-p1;Tb927.5.960:mRNA-p1;Tb11.v5.0486.1-p1;Tb927.10.9740:mRNA-p1;Tb927.10.3520:mRNA-p1;Tb927.6.3790:mRNA-p1;Tb927.10.5770:mRNA-p1;Tb927.4.1400:mRNA-p1;Tb927.5.3920:mRNA-p1;Tb927.11.3740:mRNA-p1;Tb927.7.2500:mRNA-p1;Tb927.11.6350:mRNA-p1;Tb927.6.1090:mRNA-p1;Tb927.11.1660:mRN…	AAA domain (dynein-related subfamily)/Holliday junction DNA helicase RuvB P-loop domain/ATPase family associated with various cellular activities (AAA)/AAA+ lid domain/Vps4 C terminal oligomerisation domain containing protein, putative	6	6	6	7.3	96.597	886												29.0057			28.7408	28.6917		28.3042	29.0829			29.1532	28.9605		24.2197	24.6789	24.5398	25.2473	24.2384	24.4617	24.6332	24.5395	24.3603	24.7931	24.3433	29.0057
Tb427_010008000	Tb427_010008000.1	http://tritrypdb.org/tritrypdb/processQuestion.do?questionFullName=GeneQuestions.GeneByLocusTag&questionSubmit=Get+Answer&ds_gene_ids_data=Tb427_010008000.1	Tb427_010008000	Tb427_010008000	Tb927.1.880:mRNA-p1	Tb927.1.880:mRNA-p1;Tb11.v5.0418.1-p1;Tb11.v5.0419.1-p1;Tb927.11.2430:mRNA-p1;Tb927.5.2890.2:mRNA-p1;Tb927.5.2890.1:mRNA-p1;Tb927.4.560:mRNA-p1	AAA domain (dynein-related subfamily)/Midasin AAA lid domain/ATPase family associated with various cellular activities (AAA), putative	84	84	84	21.1	513.79	4600	30.8019	30.798	30.8309	30.5545	30.4418	30.57	30.4545	29.8127	29.8701	29.8096	29.8337	29.8578	29.8746	29.632	29.793	29.837	29.3558	29.9261	29.274	29.176	29.6843	29.9534	29.3085	28.5319	30.8019	30.798	30.8309	30.5545	30.4418	30.57	30.4545	29.8127	29.8701	29.8096	29.8337	29.8578
Tb427_030049600	Tb427_030049600.1	http://tritrypdb.org/tritrypdb/processQuestion.do?questionFullName=GeneQuestions.GeneByLocusTag&questionSubmit=Get+Answer&ds_gene_ids_data=Tb427_030049600.1	Tb427_030049600	Tb427_030049600	Tb927.3.4620:mRNA-p1	Tb927.3.4620:mRNA-p1;Tb927.5.2140:mRNA-p1;Tb927.11.13380:mRNA-p1	AAA domain containing protein, putative	16	16	16	14.4	160.1	1414	26.8935	27.0897	27.1113	27.1399	26.8703	27.3278	27.1396	26.497	27.0276	27.3252	26.8461	27.1464	27.0278	27.4025	27.2457	27.2737	26.6792	27.2385	27.4249	26.8078	27.3128	27.4301	27.6048	26.7274	26.8935	27.0897	27.1113	27.1399	26.8703	27.3278	27.1396	26.497	27.0276	27.3252	26.8461	27.1464
Tb427_110151600	Tb427_110151600.1	http://tritrypdb.org/tritrypdb/processQuestion.do?questionFullName=GeneQuestions.GeneByLocusTag&questionSubmit=Get+Answer&ds_gene_ids_data=Tb427_110151600.1	Tb427_110151600	Tb427_110151600	Tb927.11.13380:mRNA-p1	Tb927.11.13380:mRNA-p1;Tb927.5.2140:mRNA-p1;Tb927.3.4620:mRNA-p1	AAA domain containing protein, putative	22	22	22	12.9	223.61	2026	29.4719	30.3563	29.6896	29.0513	28.9637	29.5927	29.5638	28.0484	29.0814	28.8672	28.2984	28.4392	28.9668	28.8707	28.6824	28.7089	28.2826	28.8979	26.9031	27.8436	27.7218	28.6495	25.7857	26.0186	29.4719	30.3563	29.6896	29.0513	28.9637	29.5927	29.5638	28.0484	29.0814	28.8672	28.2984	28.4392
Tb427_090047300	Tb427_090047300.1	http://tritrypdb.org/tritrypdb/processQuestion.do?questionFullName=GeneQuestions.GeneByLocusTag&questionSubmit=Get+Answer&ds_gene_ids_data=Tb427_090047300.1	Tb427_090047300	Tb427_090047300	Tb927.9.8450:mRNA-p1	Tb927.9.8450:mRNA-p1;Tb927.10.830:mRNA-p1;Tb927.10.5760:mRNA-p1;Tb927.10.2530:mRNA-p1;Tb927.5.3970:mRNA-p1;Tb927.2.5660:mRNA-p1;Tb927.10.2540:mRNA-p1	AAA domain/Adenylate kinase, putative	17	17	17	85.5	22.44	200	31.2517	31.4229	31.4262	30.9944	31.3221	31.2996	31.247	31.5326	31.2158	31.3147	31.4885	31.484	31.3741	31.143	31.2284	31.4104	31.8528	31.3836	31.5803	31.3567	31.5915	31.3709	31.5249	31.5982	31.2517	31.4229	31.4262	30.9944	31.3221	31.2996	31.247	31.5326	31.2158	31.3147	31.4885	31.484
Tb427_100029600	Tb427_100029600.1	http://tritrypdb.org/tritrypdb/processQuestion.do?questionFullName=GeneQuestions.GeneByLocusTag&questionSubmit=Get+Answer&ds_gene_ids_data=Tb427_100029600.1	Tb427_100029600	Tb427_100029600	Tb927.10.2530:mRNA-p1	Tb927.10.2530:mRNA-p1;Tb927.10.2540:mRNA-p1;Tb927.10.5760:mRNA-p1;Tb927.10.830:mRNA-p1;Tb927.2.5660:mRNA-p1;Tb927.9.8450:mRNA-p1;Tb927.5.3970:mRNA-p1;Tb927.11.3500:mRNA-p1	AAA domain/Adenylate kinase/Adenylate kinase, active site lid, putative	19	19	19	73.9	24.967	222	31.8701	31.9308	31.9014	31.987	31.8552	31.7373	31.747	31.928	31.6955	31.7754	31.8624	31.9507	31.6425	31.8066	31.7319	32.0422	31.7847	31.6477	31.925	31.8793	31.8568	31.8602	31.8072	32.2484	31.8701	31.9308	31.9014	31.987	31.8552	31.7373	31.747	31.928	31.6955	31.7754	31.8624	31.9507
Tb427_100011500	Tb427_100011500.1	http://tritrypdb.org/tritrypdb/processQuestion.do?questionFullName=GeneQuestions.GeneByLocusTag&questionSubmit=Get+Answer&ds_gene_ids_data=Tb427_100011500.1	Tb427_100011500	Tb427_100011500	Tb927.10.830:mRNA-p1	Tb927.10.830:mRNA-p1;Tb927.2.5660:mRNA-p1;Tb927.5.3970:mRNA-p1;Tb927.10.5760:mRNA-p1;Tb927.10.2530:mRNA-p1;Tb927.9.8450:mRNA-p1;Tb927.10.2540:mRNA-p1;Tb927.10.8000:mRNA-p1;Tb927.2.4520:mRNA-p1;Tb927.6.3150:mRNA-p1	AAA domain/Cytidylate kinase/Adenylate kinase, putative	14	14	14	52.7	29.765	260	30.9964	30.7284	30.1918	30.5152	30.8204	30.8083	30.4781	30.396	30.9049	30.4126	30.5167	30.4809	30.7553	30.4637	30.5338	30.8133	30.8676	30.4813	30.8224	30.4974	30.8893	30.7026	30.9309	30.6987	30.9964	30.7284	30.1918	30.5152	30.8204	30.8083	30.4781	30.396	30.9049	30.4126	30.5167	30.4809
Tb427_080040700	Tb427_080040700.1	http://tritrypdb.org/tritrypdb/processQuestion.do?questionFullName=GeneQuestions.GeneByLocusTag&questionSubmit=Get+Answer&ds_gene_ids_data=Tb427_080040700.1	Tb427_080040700	Tb427_080040700	Tb927.8.3560:mRNA-p1	Tb927.8.3560:mRNA-p1;Tb927.8.700:mRNA-p1;Tb927.10.910:mRNA-p1;Tb927.11.14790.2:mRNA-p1;Tb927.11.11800:mRNA-p1;Tb927.11.6890:mRNA-p1;Tb927.11.6900:mRNA-p1;Tb927.11.14790.1:mRNA-p1;Tb927.7.1000:mRNA-p1	AAA domain/PIF1-like helicase, putative	14	14	14	20.3	102.39	928	27.6341	27.6871	28.0124	27.6009	27.9631	27.8769	28.0645	26.973	27.4549	27.8572	27.4062	27.3708	27.6054	27.6151	27.7844	27.8277	27.2416	27.813	27.1163	27.4277	27.1145	27.6012	27.1178		27.6341	27.6871	28.0124	27.6009	27.9631	27.8769	28.0645	26.973	27.4549	27.8572	27.4062	27.3708
Tb427_080016400	Tb427_080016400.1	http://tritrypdb.org/tritrypdb/processQuestion.do?questionFullName=GeneQuestions.GeneByLocusTag&questionSubmit=Get+Answer&ds_gene_ids_data=Tb427_080016400.1	Tb427_080016400	Tb427_080016400	Tb927.8.1410:mRNA-p1	Tb927.8.1410:mRNA-p1;Tb11.v5.0588.1-p1;Tb927.11.9080:mRNA-p1	AARP2CN (NUC121) domain/40S ribosome biogenesis protein Tsr1 and BMS1 C-terminal, putative	22	22	22	30.6	87.413	777	29.8414	29.8354	29.6973	29.7675	29.352	29.756	29.5276	29.3035	29.2543	29.6754	29.2327	29.2462	29.2372	29.2253	29.2154	29.0504	28.6938	29.0358	28.7297	28.6637	28.5314	28.8306	28.6173	28.1926	29.8414	29.8354	29.6973	29.7675	29.352	29.756	29.5276	29.3035	29.2543	29.6754	29.2327	29.2462
Tb427_110098500	Tb427_110098500.1	http://tritrypdb.org/tritrypdb/processQuestion.do?questionFullName=GeneQuestions.GeneByLocusTag&questionSubmit=Get+Answer&ds_gene_ids_data=Tb427_110098500.1	Tb427_110098500	Tb427_110098500	Tb927.11.9080:mRNA-p1	Tb927.11.9080:mRNA-p1;Tb927.8.1410:mRNA-p1	AARP2CN (NUC121) domain/40S ribosome biogenesis protein Tsr1 and BMS1 C-terminal, putative	30	30	30	29.3	136.27	1216	29.6026	29.7151	29.7095	29.28	29.3586	29.4991	29.3648	28.8231	28.9183	29.1416	28.9138	28.965	28.9947	28.9363	28.9051	28.9725	28.4716	28.6473	28.5629	28.6308	28.3932	28.7713	28.2395	28.0103	29.6026	29.7151	29.7095	29.28	29.3586	29.4991	29.3648	28.8231	28.9183	29.1416	28.9138	28.965
Tb427_110015400	Tb427_110015400.1	http://tritrypdb.org/tritrypdb/processQuestion.do?questionFullName=GeneQuestions.GeneByLocusTag&questionSubmit=Get+Answer&ds_gene_ids_data=Tb427_110015400.1	Tb427_110015400	Tb427_110015400	Tb927.11.1070:mRNA-p1	Tb927.11.1070:mRNA-p1;Tb927.4.4050:mRNA-p1;Tb927.11.3130:mRNA-p1;Tb927.4.4490:mRNA-p1;Tb927.11.16930:mRNA-p1;Tb927.10.10880:mRNA-p1;Tb927.2.6130:mRNA-p1;Tb927.8.2160:mRNA-p1	ABC transporter transmembrane region 2/ABC transporter, putative	24	24	24	38.9	75.632	684	29.8722	29.4812	29.398	29.7252	29.7911	29.7076	29.7193	29.4068	29.9255	29.4277	29.6348	29.4142	29.7191	29.4621	29.551	29.3697	29.7029	29.1724	29.5257	28.8917	28.9152	28.994	29.3324	28.375	29.8722	29.4812	29.398	29.7252	29.7911	29.7076	29.7193	29.4068	29.9255	29.4277	29.6348	29.4142
Tb427_040043200	Tb427_040043200.1	http://tritrypdb.org/tritrypdb/processQuestion.do?questionFullName=GeneQuestions.GeneByLocusTag&questionSubmit=Get+Answer&ds_gene_ids_data=Tb427_040043200.1	Tb427_040043200	Tb427_040043200	Tb927.4.4050:mRNA-p1	Tb927.4.4050:mRNA-p1;Tb927.11.3130:mRNA-p1;Tb927.11.1070:mRNA-p1;Tb927.4.4490:mRNA-p1;Tb927.8.2160:mRNA-p1;Tb927.11.540.1-p1;Tb927.11.540.2-p1;Tb927.11.16930:mRNA-p1;Tb927.4.2510:mRNA-p1;Tb927.10.1630:mRNA-p1	ABC transporter transmembrane region 2/ABC transporter, putative	16	16	16	31.5	75.977	683	28.8651	28.6211	28.4428	28.4967	28.6712	28.6433	28.6307	27.7848	28.4882	28.2898	28.1905	28.1867	28.6873	28.308	28.5262	28.2988	28.1519	28.3033	27.7383	27.9696	27.6072	28.2784	27.7479	27.1741	28.8651	28.6211	28.4428	28.4967	28.6712	28.6433	28.6307	27.7848	28.4882	28.2898	28.1905	28.1867
Tb427_110036300	Tb427_110036300.1	http://tritrypdb.org/tritrypdb/processQuestion.do?questionFullName=GeneQuestions.GeneByLocusTag&questionSubmit=Get+Answer&ds_gene_ids_data=Tb427_110036300.1	Tb427_110036300	Tb427_110036300	Tb927.11.3130:mRNA-p1	Tb927.11.3130:mRNA-p1;Tb927.4.4050:mRNA-p1;Tb927.11.1070:mRNA-p1;Tb927.11.16930:mRNA-p1;Tb927.4.2510:mRNA-p1;Tb927.11.540.1-p1;Tb927.11.540.2-p1;Tb927.4.4490:mRNA-p1;Tb927.8.2160:mRNA-p1	ABC transporter transmembrane region 2/ABC transporter, putative	18	18	18	27.5	71.166	641	28.6863	28.2211	28.6994	27.7949	28.3217	28.2377	28.3072	27.6855	28.0965	28.3791	28.23	27.858	27.9731	28.0818	27.9261	28.0804	27.8859	27.765	27.4055	27.5921	27.8058	28.1092	27.4963	26.9725	28.6863	28.2211	28.6994	27.7949	28.3217	28.2377	28.3072	27.6855	28.0965	28.3791	28.23	27.858
Tb427_110189200	Tb427_110189200.1	http://tritrypdb.org/tritrypdb/processQuestion.do?questionFullName=GeneQuestions.GeneByLocusTag&questionSubmit=Get+Answer&ds_gene_ids_data=Tb427_110189200.1	Tb427_110189200	Tb427_110189200	Tb927.11.16930:mRNA-p1	Tb927.11.16930:mRNA-p1;Tb927.11.540.1-p1;Tb927.11.540.2-p1;Tb927.8.2160:mRNA-p1;Tb927.4.4490:mRNA-p1;Tb927.4.2510:mRNA-p1;Tb927.2.6130:mRNA-p1;Tb927.10.7360:mRNA-p1;Tb927.2.5410:mRNA-p1;Tb927.8.2380:mRNA-p1;Tb927.1.4420:mRNA-p1;Tb927.10.7700:mRNA-p1;Tb927.9.6310:mRNA-p1;Tb11.v5.0734.1-p1;Tb927.11.6120:mRNA-p1;Tb927.11.3130:mRNA-p1;Tb927.4.4050:mRNA-p1;Tb927.10.3170:mRNA-p1;Tb927.3.3730:mRNA-p1;Tb…	ABC transporter transmembrane region/ABC transporter, putative	10	10	10	17.4	79.087	719	27.0299	26.7286	26.705		26.928	26.6036	26.9694	26.6352	26.8115	26.6118	26.576	26.7268	27.0279	27.0663	26.7933	26.9256	26.4955	27.0803	26.7493	27.0155	26.9123	26.9887	26.6877	27.0968	27.0299	26.7286	26.705	24.7431	26.928	26.6036	26.9694	26.6352	26.8115	26.6118	26.576	26.7268
Tb427_040048000	Tb427_040048000.1	http://tritrypdb.org/tritrypdb/processQuestion.do?questionFullName=GeneQuestions.GeneByLocusTag&questionSubmit=Get+Answer&ds_gene_ids_data=Tb427_040048000.1	Tb427_040048000	Tb427_040048000	Tb927.4.4490:mRNA-p1	Tb927.4.4490:mRNA-p1;Tb927.8.2160:mRNA-p1;Tb927.4.2510:mRNA-p1;Tb11.v5.0734.1-p1;Tb927.11.16930:mRNA-p1;Tb927.11.540.1-p1;Tb927.11.540.2-p1;Tb927.2.6130:mRNA-p1;Tb927.3.3730:mRNA-p1;Tb11.v5.0791.1-p1;Tb927.10.3170:mRNA-p1;Tb927.4.4050:mRNA-p1;Tb927.1.4420:mRNA-p1;Tb927.10.7360:mRNA-p1;Tb927.10.10880:mRNA-p1;Tb927.11.1070:mRNA-p1;Tb927.2.5410:mRNA-p1;Tb927.10.1630:mRNA-p1;Tb927.10.15530:mRNA-p1;Tb…	ABC transporter transmembrane region/ABC transporter, putative	61	61	61	41.2	193.97	1759	31.8543	31.8735	31.6084	31.4709	32.1704	32.1486	32.0917	31.9149	32.0765	32.0963	32.0518	32.0863	32.276	32.3558	32.205	32.379	32.2324	32.554	32.1697	32.2786	32.4987	32.7119	32.3172	32.4121	31.8543	31.8735	31.6084	31.4709	32.1704	32.1486	32.0917	31.9149	32.0765	32.0963	32.0518	32.0863
Tb427_110009600	Tb427_110009600.1	http://tritrypdb.org/tritrypdb/processQuestion.do?questionFullName=GeneQuestions.GeneByLocusTag&questionSubmit=Get+Answer&ds_gene_ids_data=Tb427_110009600.1	Tb427_110009600	Tb427_110009600	Tb927.11.540.2-p1	Tb927.11.540.2-p1;Tb927.11.540.1-p1;Tb927.11.16930:mRNA-p1;Tb927.4.2510:mRNA-p1;Tb927.2.6130:mRNA-p1;Tb927.2.5410:mRNA-p1;Tb927.8.2160:mRNA-p1;Tb927.4.4490:mRNA-p1;Tb927.10.10880:mRNA-p1;Tb927.1.4420:mRNA-p1;Tb927.8.2380:mRNA-p1;Tb11.v5.0734.1-p1;Tb927.10.7700:mRNA-p1;Tb927.9.6310:mRNA-p1;Tb927.4.4050:mRNA-p1;Tb927.10.7360:mRNA-p1;Tb927.10.1630:mRNA-p1;Tb11.v5.0748.1-p1;Tb927.10.15530:mRNA-p1;Tb1…	ABC transporter transmembrane region/ABC transporter, putative	24	24	24	50.1	76.247	691	30.2573	30.392	30.2091	29.9781	30.1122	30.2373	30.3053	30.0471	29.8656	30.1744	30.0809	30.2756	30.0935	30.3888	30.0619	30.3501	30.0401	30.4294	30.4092	30.3377	30.4864	30.4346	30.4498	30.3806	30.2573	30.392	30.2091	29.9781	30.1122	30.2373	30.3053	30.0471	29.8656	30.1744	30.0809	30.2756
Tb427_080024700	Tb427_080024700.1	http://tritrypdb.org/tritrypdb/processQuestion.do?questionFullName=GeneQuestions.GeneByLocusTag&questionSubmit=Get+Answer&ds_gene_ids_data=Tb427_080024700.1	Tb427_080024700	Tb427_080024700	Tb927.8.2160:mRNA-p1	Tb927.8.2160:mRNA-p1;Tb927.4.4490:mRNA-p1;Tb927.4.2510:mRNA-p1;Tb11.v5.0734.1-p1;Tb927.2.6130:mRNA-p1;Tb927.11.16930:mRNA-p1;Tb927.11.540.1-p1;Tb927.11.540.2-p1;Tb927.3.3730:mRNA-p1;Tb927.2.5410:mRNA-p1;Tb927.10.7360:mRNA-p1;Tb927.10.7700:mRNA-p1;Tb927.4.4050:mRNA-p1;Tb927.1.4420:mRNA-p1;Tb927.11.6120:mRNA-p1;Tb927.6.2810:mRNA-p1;Tb927.11.1070:mRNA-p1;Tb927.10.3170:mRNA-p1;Tb11.v5.0791.1-p1;Tb927…	ABC transporter transmembrane region/ABC transporter, putative	62	62	62	43.1	174.58	1581	32.058	31.8264	31.9072	31.5409	31.7658	31.4458	31.656	31.3066	31.6148	31.4266	31.4006	31.2322	31.6847	31.4599	31.5946	31.4859	31.9494	31.4582	31.2564	31.1624	31.5604	31.6193	31.3542	31.078	32.058	31.8264	31.9072	31.5409	31.7658	31.4458	31.656	31.3066	31.6148	31.4266	31.4006	31.2322
Tb427_010029700	Tb427_010029700.1	http://tritrypdb.org/tritrypdb/processQuestion.do?questionFullName=GeneQuestions.GeneByLocusTag&questionSubmit=Get+Answer&ds_gene_ids_data=Tb427_010029700.1	Tb427_010029700	Tb427_010029700	Tb927.1.4420:mRNA-p1	Tb927.1.4420:mRNA-p1;Tb927.11.16930:mRNA-p1;Tb927.2.6130:mRNA-p1;Tb927.11.540.1-p1;Tb927.11.540.2-p1;Tb927.10.1630:mRNA-p1;Tb927.2.5410:mRNA-p1;Tb927.4.4490:mRNA-p1;Tb927.4.2510:mRNA-p1;Tb927.3.3730:mRNA-p1;Tb927.8.2160:mRNA-p1;Tb927.4.4050:mRNA-p1	ABC transporter, putative	48	48	48	56	104.57	945	31.6532	31.6658	31.3961	31.3109	32.739	32.7533	32.8358	32.3287	32.9092	32.9649	32.8322	32.9482	32.9751	33.1455	32.8628	33.0292	32.6508	33.0432	33.0952	33.0985	32.8703	33.0743	33.0889	32.8094	31.6532	31.6658	31.3961	31.3109	32.739	32.7533	32.8358	32.3287	32.9092	32.9649	32.8322	32.9482
Tb427_060033200	Tb427_060033200.1	http://tritrypdb.org/tritrypdb/processQuestion.do?questionFullName=GeneQuestions.GeneByLocusTag&questionSubmit=Get+Answer&ds_gene_ids_data=Tb427_060033200.1	Tb427_060033200	Tb427_060033200	Tb927.6.2810:mRNA-p1	Tb927.6.2810:mRNA-p1;Tb927.10.1630:mRNA-p1;Tb927.8.2380:mRNA-p1;Tb927.10.7360:mRNA-p1;Tb927.8.2160:mRNA-p1;Tb927.10.10880:mRNA-p1;Tb927.3.3730:mRNA-p1;Tb927.11.6120:mRNA-p1;Tb927.4.4490:mRNA-p1	ABC transporter, putative	12	12	12	24.6	57.572	521	25.3581	25.3868	25.8563	26.3185	26.6183	26.1855	26.4532	26.1646	26.4461	26.1824	25.9132	26.3386	26.4218	26.5476	26.2523	26.0368	25.7187	26.0093	25.9315	25.9858	26.4323	26.7387	25.7887	26.0361	25.3581	25.3868	25.8563	26.3185	26.6183	26.1855	26.4532	26.1646	26.4461	26.1824	25.9132	26.3386
Tb427_100036800	Tb427_100036800.1	http://tritrypdb.org/tritrypdb/processQuestion.do?questionFullName=GeneQuestions.GeneByLocusTag&questionSubmit=Get+Answer&ds_gene_ids_data=Tb427_100036800.1	Tb427_100036800	Tb427_100036800	Tb927.10.3170:mRNA-p1	Tb927.10.3170:mRNA-p1;Tb11.v5.0791.1-p1;Tb927.10.15530:mRNA-p1;Tb11.v5.0748.1-p1;Tb927.10.10880:mRNA-p1;Tb927.4.2510:mRNA-p1;Tb927.4.4490:mRNA-p1;Tb927.11.8210:mRNA-p1;Tb927.9.6310:mRNA-p1;Tb927.11.16930:mRNA-p1;Tb927.10.1630:mRNA-p1;Tb927.11.6120:mRNA-p1;Tb927.10.7700:mRNA-p1;Tb927.11.540.1-p1;Tb927.11.540.2-p1;Tb927.10.7360:mRNA-p1;Tb927.2.5410:mRNA-p1;Tb927.8.2160:mRNA-p1;Tb927.11.3130:mRNA-p1…	ABC transporter, putative	27	27	27	47.6	82.395	723	30.2774	30.2847	30.2773	30.4099	30.4209	30.3616	30.4828	30.2275	30.0245	30.1959	30.3082	30.0018	29.921	30.1551	30.0825	30.001	29.7066	30.015	29.5985	29.6773	29.7038	30.003	29.6216	29.5065	30.2774	30.2847	30.2773	30.4099	30.4209	30.3616	30.4828	30.2275	30.0245	30.1959	30.3082	30.0018
Tb427_100116000	Tb427_100116000.1	http://tritrypdb.org/tritrypdb/processQuestion.do?questionFullName=GeneQuestions.GeneByLocusTag&questionSubmit=Get+Answer&ds_gene_ids_data=Tb427_100116000.1	Tb427_100116000	Tb427_100116000	Tb927.10.10880:mRNA-p1	Tb927.10.10880:mRNA-p1;Tb927.10.15530:mRNA-p1;Tb927.10.3170:mRNA-p1;Tb11.v5.0748.1-p1;Tb11.v5.0791.1-p1;Tb927.11.540.1-p1;Tb927.11.540.2-p1;Tb927.3.3730:mRNA-p1;Tb927.4.2510:mRNA-p1;Tb927.4.4490:mRNA-p1;Tb927.10.1630:mRNA-p1;Tb927.10.7360:mRNA-p1;Tb927.6.2810:mRNA-p1;Tb927.9.6310:mRNA-p1;Tb927.2.6130:mRNA-p1;Tb927.11.1070:mRNA-p1;Tb927.11.16930:mRNA-p1;Tb927.11.6120:mRNA-p1;Tb927.2.5410:mRNA-p1;T…	ABC transporter, putative	29	29	29	60.5	77.576	684	31.2946	31.3319	31.138	31.2177	31.44	31.2723	31.1903	31.2295	31.2868	31.118	31.1866	31.2614	31.2913	31.2693	31.153	31.2239	31.0414	30.5749	30.7626	31.1125	30.4425	30.7179	30.6358	30.5996	31.2946	31.3319	31.138	31.2177	31.44	31.2723	31.1903	31.2295	31.2868	31.118	31.1866	31.2614
Tb427_100163900	Tb427_100163900.1	http://tritrypdb.org/tritrypdb/processQuestion.do?questionFullName=GeneQuestions.GeneByLocusTag&questionSubmit=Get+Answer&ds_gene_ids_data=Tb427_100163900.1	Tb427_100163900	Tb427_100163900	Tb927.10.15530:mRNA-p1	Tb927.10.15530:mRNA-p1;Tb11.v5.0748.1-p1;Tb927.10.3170:mRNA-p1;Tb927.10.10880:mRNA-p1;Tb11.v5.0791.1-p1;Tb927.3.3730:mRNA-p1;Tb927.8.2380:mRNA-p1;Tb927.11.540.1-p1;Tb927.11.540.2-p1;Tb927.11.6120:mRNA-p1;Tb927.2.6130:mRNA-p1;Tb927.4.4490:mRNA-p1;Tb927.9.6310:mRNA-p1	ABC transporter, putative	37	37	37	67.1	67.522	602	31.5589	31.6515	31.6071	31.6206	31.3237	31.4013	31.3175	31.4276	31.3588	31.2624	31.4401	31.365	31.2715	31.1102	31.165	31.255	31.2717	30.8579	30.6563	30.9796	30.9223	30.9379	30.7944	30.9448	31.5589	31.6515	31.6071	31.6206	31.3237	31.4013	31.3175	31.4276	31.3588	31.2624	31.4401	31.365
Tb427_020028700	Tb427_020028700.1	http://tritrypdb.org/tritrypdb/processQuestion.do?questionFullName=GeneQuestions.GeneByLocusTag&questionSubmit=Get+Answer&ds_gene_ids_data=Tb427_020028700.1	Tb427_020028700	Tb427_020028700	Tb927.2.5410:mRNA-p1	Tb927.2.5410:mRNA-p1;Tb927.11.540.1-p1;Tb927.11.540.2-p1;Tb927.11.16930:mRNA-p1;Tb927.2.6130:mRNA-p1;Tb927.1.4420:mRNA-p1;Tb927.4.2510:mRNA-p1;Tb927.8.2160:mRNA-p1;Tb927.4.4490:mRNA-p1;Tb11.v5.0791.1-p1;Tb927.10.3170:mRNA-p1;Tb927.8.2380:mRNA-p1	ABC transporter, putative	2	2	2	2.9	142.65	1281	29.7701													30.1551				29.6942		30.2384	29.9176				29.7701	24.883	24.5711	25.1394	24.4669	25.0416	24.6911	24.9821	24.4683	24.5157	23.9878	24.5598
Tb427_080026900	Tb427_080026900.1	http://tritrypdb.org/tritrypdb/processQuestion.do?questionFullName=GeneQuestions.GeneByLocusTag&questionSubmit=Get+Answer&ds_gene_ids_data=Tb427_080026900.1	Tb427_080026900	Tb427_080026900	Tb927.8.2380:mRNA-p1	Tb927.8.2380:mRNA-p1;Tb927.10.7360:mRNA-p1;Tb927.9.6310:mRNA-p1;Tb927.10.7700:mRNA-p1;Tb927.11.16930:mRNA-p1;Tb927.3.3730:mRNA-p1;Tb927.11.6120:mRNA-p1;Tb927.11.540.1-p1;Tb927.11.540.2-p1;Tb927.6.2810:mRNA-p1;Tb11.v5.0780.1-p1;Tb927.2.6130:mRNA-p1;Tb11.v5.0734.1-p1;Tb927.4.2510:mRNA-p1;Tb927.10.15530:mRNA-p1;Tb927.2.5410:mRNA-p1;Tb11.v5.0748.1-p1;Tb927.8.2160:mRNA-p1;Tb11.v5.0791.1-p1;Tb927.10.31…	ABC transporter/ABC-2 type transporter, putative	26	26	26	25.6	126.93	1158	28.1191	27.8753	27.6875	27.8414	28.5434	28.5419	28.6097	28.7156	28.5572	28.8521	28.7989	28.9552	28.9525	29.1489	28.9854	29.1631	29.1578	29.812	29.5539	29.4097	29.7994	29.7064	29.7962	29.6413	28.1191	27.8753	27.6875	27.8414	28.5434	28.5419	28.6097	28.7156	28.5572	28.8521	28.7989	28.9552
Tb427_090034900	Tb427_090034900.1	http://tritrypdb.org/tritrypdb/processQuestion.do?questionFullName=GeneQuestions.GeneByLocusTag&questionSubmit=Get+Answer&ds_gene_ids_data=Tb427_090034900.1	Tb427_090034900	Tb427_090034900	Tb927.9.6310:mRNA-p1	Tb927.9.6310:mRNA-p1;Tb927.10.7700:mRNA-p1;Tb927.10.7360:mRNA-p1;Tb927.8.2380:mRNA-p1;Tb927.11.16930:mRNA-p1;Tb11.v5.0791.1-p1;Tb927.10.3170:mRNA-p1;Tb927.11.540.1-p1;Tb927.11.540.2-p1;Tb927.11.6120:mRNA-p1;Tb927.3.3730:mRNA-p1;Tb927.10.10880:mRNA-p1;Tb11.v5.0780.1-p1;Tb927.10.15530:mRNA-p1;Tb927.4.4490:mRNA-p1;Tb11.v5.0748.1-p1	ABC transporter/ABC-2 type transporter, putative	25	25	25	49.5	72.215	646	31.9054	31.7819	31.8304	31.5208	31.7443	31.6365	31.588	31.7734	31.5048	31.3666	31.3047	31.1833	31.6737	31.301	31.4791	31.2578	31.4712	31.3086	30.8573	31.0123	31.2825	31.4871	31.1568	31.0812	31.9054	31.7819	31.8304	31.5208	31.7443	31.6365	31.588	31.7734	31.5048	31.3666	31.3047	31.1833
Tb427_100083600	Tb427_100083600.1	http://tritrypdb.org/tritrypdb/processQuestion.do?questionFullName=GeneQuestions.GeneByLocusTag&questionSubmit=Get+Answer&ds_gene_ids_data=Tb427_100083600.1	Tb427_100083600	Tb427_100083600	Tb927.10.7700:mRNA-p1	Tb927.10.7700:mRNA-p1;Tb927.9.6310:mRNA-p1;Tb927.10.7360:mRNA-p1;Tb927.8.2380:mRNA-p1;Tb927.11.16930:mRNA-p1;Tb927.11.540.1-p1;Tb927.11.540.2-p1;Tb927.3.3730:mRNA-p1;Tb11.v5.0780.1-p1;Tb927.11.6120:mRNA-p1;Tb927.8.2160:mRNA-p1;Tb927.10.3170:mRNA-p1;Tb927.4.4490:mRNA-p1;Tb11.v5.0791.1-p1	ABC transporter/ABC-2 type transporter, putative	24	24	24	42.5	75.094	668	32.5121	32.5342	32.5129	32.2403	31.4166	31.5938	31.417	31.4762	31.3959	31.4622	31.0911	31.2238	31.5227	31.7547	31.4277	31.5329	31.6445	31.8984	31.4138	31.5341	31.6253	31.9161	31.4401	31.5812	32.5121	32.5342	32.5129	32.2403	31.4166	31.5938	31.417	31.4762	31.3959	31.4622	31.0911	31.2238
Tb427_050040700	Tb427_050040700.1	http://tritrypdb.org/tritrypdb/processQuestion.do?questionFullName=GeneQuestions.GeneByLocusTag&questionSubmit=Get+Answer&ds_gene_ids_data=Tb427_050040700.1	Tb427_050040700	Tb427_050040700	Tb927.5.3420:mRNA-p1	Tb927.5.3420:mRNA-p1;Tb11.v5.0736.1-p1;Tb927.10.11940:mRNA-p1;Tb927.10.8730:mRNA-p1;Tb927.10.9900:mRNA-p1;Tb927.8.4000.2:mRNA-p1;Tb927.8.4000.1:mRNA-p1	ABC1 family, putative	13	13	13	29.2	59.882	528	28.2979	27.9977	27.9528		28.3667	28.3129	28.1485	27.6244	28.2274	28.1284	27.6699	27.7984	28.6603	29.0562	28.5867	28.4113	28.6339	28.974	28.3637	28.6316	28.8005	29.0265	28.5992	29.0205	28.2979	27.9977	27.9528	25.1613	28.3667	28.3129	28.1485	27.6244	28.2274	28.1284	27.6699	27.7984
Tb427_100105800	Tb427_100105800.1	http://tritrypdb.org/tritrypdb/processQuestion.do?questionFullName=GeneQuestions.GeneByLocusTag&questionSubmit=Get+Answer&ds_gene_ids_data=Tb427_100105800.1	Tb427_100105800	Tb427_100105800	Tb927.10.9900:mRNA-p1	Tb927.10.9900:mRNA-p1;Tb11.v5.0736.1-p1;Tb927.5.3420:mRNA-p1;Tb927.10.11940:mRNA-p1;Tb927.10.8730:mRNA-p1	ABC1 family, putative	21	21	21	48	57.22	515	28.9639	29.2612	28.8529	28.5166	29.1379	29.418	29.191	28.8389	29.2557	28.9042	29.0939	28.9578	29.1162	29.2725	29.528	29.2441	29.0992	29.4757	29.4324	29.3215	29.297	29.6458	29.5391	29.5651	28.9639	29.2612	28.8529	28.5166	29.1379	29.418	29.191	28.8389	29.2557	28.9042	29.0939	28.9578
Tb427_080044800	Tb427_080044800.1	http://tritrypdb.org/tritrypdb/processQuestion.do?questionFullName=GeneQuestions.GeneByLocusTag&questionSubmit=Get+Answer&ds_gene_ids_data=Tb427_080044800.1	Tb427_080044800	Tb427_080044800	Tb927.8.4000.2:mRNA-p1	Tb927.8.4000.2:mRNA-p1;Tb927.8.4000.1:mRNA-p1;Tb927.10.8730:mRNA-p1;Tb11.v5.0736.1-p1;Tb927.5.3420:mRNA-p1;Tb927.10.11940:mRNA-p1	ABC1 family, putative	8	8	8	14.2	71.441	636	26.3826	26.341	26.2208		26.1959	26.2186			25.9155	26.7285	26.0432		26.5575	26.7888	26.6513	26.1006	26.3737	27.2332	26.0615	26.7152	26.9218	26.96			26.3826	26.341	26.2208	24.962	26.1959	26.2186	24.2885	24.2358	25.9155	26.7285	26.0432	24.333
Tb427_100094100	Tb427_100094100.1	http://tritrypdb.org/tritrypdb/processQuestion.do?questionFullName=GeneQuestions.GeneByLocusTag&questionSubmit=Get+Answer&ds_gene_ids_data=Tb427_100094100.1	Tb427_100094100	Tb427_100094100	Tb927.10.8730:mRNA-p1	Tb927.10.8730:mRNA-p1;Tb927.8.4000.2:mRNA-p1;Tb11.v5.0736.1-p1;Tb927.5.3420:mRNA-p1;Tb927.8.4000.1:mRNA-p1;Tb927.10.11940:mRNA-p1;Tb927.10.9900:mRNA-p1	ABC1 family/RIO1 family, putative	24	24	24	54.1	60.65	529	31.0341	30.9742	31.1606	30.7084	30.976	30.743	30.9409	30.6205	30.5657	30.9593	30.6388	30.7352	31.0016	30.9543	30.6047	30.7553	30.5585	31.184	30.67	30.8138	30.9062	30.9242	30.982	31.042	31.0341	30.9742	31.1606	30.7084	30.976	30.743	30.9409	30.6205	30.5657	30.9593	30.6388	30.7352
Tb427_030040100	Tb427_030040100.1	http://tritrypdb.org/tritrypdb/processQuestion.do?questionFullName=GeneQuestions.GeneByLocusTag&questionSubmit=Get+Answer&ds_gene_ids_data=Tb427_030040100.1	Tb427_030040100	Tb427_030040100	Tb927.3.3730:mRNA-p1	Tb927.3.3730:mRNA-p1;Tb927.11.6120:mRNA-p1;Tb927.10.10880:mRNA-p1;Tb927.4.4490:mRNA-p1;Tb11.v5.0780.1-p1;Tb927.8.2380:mRNA-p1;Tb927.8.2160:mRNA-p1;Tb927.10.7360:mRNA-p1;Tb927.10.7700:mRNA-p1;Tb927.9.6310:mRNA-p1;Tb927.1.4420:mRNA-p1;Tb927.11.16930:mRNA-p1;Tb927.10.1630:mRNA-p1;Tb927.6.2810:mRNA-p1;Tb927.4.2510:mRNA-p1;Tb927.10.3170:mRNA-p1	ABC-2 family transporter protein/ABC transporter, putative	46	46	46	28.1	202.3	1845		24.5578	25.5196	25.2702	29.3914	29.9129	29.946	29.1795	30.6307	30.5113	30.3105	30.7422	30.997	31.1996	30.8848	31.0426	29.5593	32.3461	30.5714	30.8173	31.4714	31.9311	31.396	30.8914	24.5089	24.5578	25.5196	25.2702	29.3914	29.9129	29.946	29.1795	30.6307	30.5113	30.3105	30.7422
Tb427_110134400	Tb427_110134400.1	http://tritrypdb.org/tritrypdb/processQuestion.do?questionFullName=GeneQuestions.GeneByLocusTag&questionSubmit=Get+Answer&ds_gene_ids_data=Tb427_110134400.1	Tb427_110134400	Tb427_110134400	Tb927.11.11780:mRNA-p1	Tb927.11.11780:mRNA-p1	Acetyl-CoA dehydrogenase C-terminal like, putative	23	23	23	46.6	66.592	607	30.1004	30.4127	29.9883	29.939	30.2467	30.4759	30.2835	30.4016	30.2054	30.4443	30.2027	30.4377	30.2797	30.6318	30.5016	30.4962	30.1684	30.6716	30.6006	30.59	30.4296	30.4643	30.7162	30.6361	30.1004	30.4127	29.9883	29.939	30.2467	30.4759	30.2835	30.4016	30.2054	30.4443	30.2027	30.4377
Tb427_080028400	Tb427_080028400.1;Tb427_080031300.1	http://tritrypdb.org/tritrypdb/processQuestion.do?questionFullName=GeneQuestions.GeneByLocusTag&questionSubmit=Get+Answer&ds_gene_ids_data=Tb427_080028400.1,Tb427_080031300.1	Tb427_080028400;Tb427_080031300:pseudogene	Tb427_080028400	Tb927.8.2520:mRNA-p1;Tb927.8.2790:pseudogenic_transcript-p1	Tb927.8.2520:mRNA-p1;Tb927.8.2790:pseudogenic_transcript-p1;Tb11.v5.0561.1-p1;Tb927.9.4210:mRNA-p1	Acetyl-coenzyme A synthetase N-terminus/AMP-binding enzyme/AMP-binding enzyme C-terminal domain containing protein, putative	29	29	29	53.3	74.658	673	31.5931	31.6607	31.7859	31.6556	32.0391	32.1694	32.2773	32.2323	31.9579	32.2059	32.07	32.1027	31.823	32.2064	32.1898	32.197	31.5867	32.2574	31.5662	32.1551	31.8814	32.2802	31.8657	31.7469	31.5931	31.6607	31.7859	31.6556	32.0391	32.1694	32.2773	32.2323	31.9579	32.2059	32.07	32.1027
Tb427_030005800	Tb427_030005800.1	http://tritrypdb.org/tritrypdb/processQuestion.do?questionFullName=GeneQuestions.GeneByLocusTag&questionSubmit=Get+Answer&ds_gene_ids_data=Tb427_030005800.1	Tb427_030005800	Tb427_030005800	Tb927.3.610:mRNA-p1	Tb927.3.610:mRNA-p1;Tb927.11.4530:mRNA-p1	Acetyltransferase (GNAT) domain/Acetyltransferase (GNAT) family/FR47-like protein, putative	5	5	5	30.1	21.478	186	26.9492	26.9356	27.1	27.4207	27.564	27.238	27.3916	27.8903	27.3112	27.2507	27.2374	27.061	27.2665	27.5424	27.369	27.4339	27.111	27.0235	27.1924	27.1878	27.5065	27.1272	26.8381	27.6369	26.9492	26.9356	27.1	27.4207	27.564	27.238	27.3916	27.8903	27.3112	27.2507	27.2374	27.061
Tb427_110126500	Tb427_110126500.1	http://tritrypdb.org/tritrypdb/processQuestion.do?questionFullName=GeneQuestions.GeneByLocusTag&questionSubmit=Get+Answer&ds_gene_ids_data=Tb427_110126500.1	Tb427_110126500	Tb427_110126500	Tb927.11.11100:mRNA-p1	Tb927.11.11100:mRNA-p1	Acetyltransferase (GNAT) domain/Acetyltransferase (GNAT) family/FR47-like protein, putative	6	6	6	42.9	16.247	147	26.7264	26.6569	26.9306	27.0331	26.7152	25.9703	26.7905	26.5226	26.2222	26.7112	26.9213	26.5537	26.7155	26.7661	26.846	27.2573	26.5916	26.129	26.0868	26.9474	26.7939	26.3866	26.3467	26.6453	26.7264	26.6569	26.9306	27.0331	26.7152	25.9703	26.7905	26.5226	26.2222	26.7112	26.9213	26.5537
Tb427_070029800	Tb427_070029800.1	http://tritrypdb.org/tritrypdb/processQuestion.do?questionFullName=GeneQuestions.GeneByLocusTag&questionSubmit=Get+Answer&ds_gene_ids_data=Tb427_070029800.1	Tb427_070029800	Tb427_070029800	Tb927.7.2530:mRNA-p1	Tb927.7.2530:mRNA-p1	Acetyltransferase (GNAT) domain/FR47-like protein, putative	5	5	5	17.5	34.23	308	26.4691	25.8245	25.799		25.6784	25.2757	25.7238		25.6844	25.8754	26.0271	25.983	25.5019	25.8917	25.7901	25.9418	25.7777	25.5265	25.9629	25.9466	25.5102		25.3179		26.4691	25.8245	25.799	24.9688	25.6784	25.2757	25.7238	24.043	25.6844	25.8754	26.0271	25.983
Tb427_100135500	Tb427_100135500.1	http://tritrypdb.org/tritrypdb/processQuestion.do?questionFullName=GeneQuestions.GeneByLocusTag&questionSubmit=Get+Answer&ds_gene_ids_data=Tb427_100135500.1	Tb427_100135500	Tb427_100135500	Tb927.10.12830.1:mRNA-p1	Tb927.10.12830.1:mRNA-p1;Tb927.10.12830.2:mRNA-p1	Acetyltransferase (GNAT) family, putative	3	3	3	9.2	37.114	336																	24.8177	24.1765							24.7469	24.9538	24.289	25.2712	24.4738	24.2018	24.915	24.5408	24.6645	24.4957	24.6993	24.6162
Tb427_010030100	Tb427_010030100.1	http://tritrypdb.org/tritrypdb/processQuestion.do?questionFullName=GeneQuestions.GeneByLocusTag&questionSubmit=Get+Answer&ds_gene_ids_data=Tb427_010030100.1	Tb427_010030100	Tb427_010030100	Tb927.1.4490:mRNA-p1	Tb927.1.4490:mRNA-p1	Acetyltransferase (GNAT) family, putative	8	8	8	37.2	19.71	172	28.8825	28.7692	28.8831	28.9556	27.713	27.7503	27.5458	27.9133	27.6438	27.9969	27.5671	27.4348	28.1068	28.1655	28.3208	27.848	28.021	28.6011	27.745	27.9217	27.9834	28.2103	27.9685	28.8384	28.8825	28.7692	28.8831	28.9556	27.713	27.7503	27.5458	27.9133	27.6438	27.9969	27.5671	27.4348
Tb427_100036600	Tb427_100036600.1	http://tritrypdb.org/tritrypdb/processQuestion.do?questionFullName=GeneQuestions.GeneByLocusTag&questionSubmit=Get+Answer&ds_gene_ids_data=Tb427_100036600.1	Tb427_100036600	Tb427_100036600	Tb927.10.3150:mRNA-p1	Tb927.10.3150:mRNA-p1;Tb927.11.4530:mRNA-p1	Acetyltransferase (GNAT) family/Acetyltransferase (GNAT) domain containing protein, putative	10	10	10	56.6	23.621	205	29.8537	29.9924	29.9769	29.8161	29.8903	29.647	29.7471	29.5226	29.6382	29.7061	29.8036	29.5469	29.6701	29.8059	29.6718	29.6406	29.0944	29.4463	29.1013	29.6072	29.2567	29.0417	29.2034	29.183	29.8537	29.9924	29.9769	29.8161	29.8903	29.647	29.7471	29.5226	29.6382	29.7061	29.8036	29.5469
Tb427_110050400	Tb427_110050400.1	http://tritrypdb.org/tritrypdb/processQuestion.do?questionFullName=GeneQuestions.GeneByLocusTag&questionSubmit=Get+Answer&ds_gene_ids_data=Tb427_110050400.1	Tb427_110050400	Tb427_110050400	Tb927.11.4530:mRNA-p1	Tb927.11.4530:mRNA-p1;Tb927.3.610:mRNA-p1;Tb927.10.3150:mRNA-p1	Acetyltransferase (GNAT) family/Acetyltransferase (GNAT) domain/FR47-like protein, putative	12	12	12	58.6	27.47	239	29.8298	29.9449	30.249	29.7907	29.6502	29.8138	29.9415	29.9624	29.5733	29.7788	29.5802	29.6748	29.2297	29.4272	29.4448	29.4984	29.1122	28.8148	28.6903	29.2551	29.0108	28.6037	28.6043	28.7769	29.8298	29.9449	30.249	29.7907	29.6502	29.8138	29.9415	29.9624	29.5733	29.7788	29.5802	29.6748
Tb427_070028200	Tb427_070028200.1	http://tritrypdb.org/tritrypdb/processQuestion.do?questionFullName=GeneQuestions.GeneByLocusTag&questionSubmit=Get+Answer&ds_gene_ids_data=Tb427_070028200.1	Tb427_070028200	Tb427_070028200	Tb927.7.2360:mRNA-p1	Tb927.7.2360:mRNA-p1	Acetyltransferase (GNAT) family/Acetyltransferase (GNAT) domain/FR47-like protein, putative	10	10	10	39.9	34.622	308	30.5733	30.1035	30.294	30.0913	30.1256	29.7947	30.0332	29.9138	29.7695	30.0326	29.5146	29.6672	29.8991	29.8045	29.5825	29.561	29.4553	29.3732	29.1464	29.181	29.0719	29.2314	28.925	28.6238	30.5733	30.1035	30.294	30.0913	30.1256	29.7947	30.0332	29.9138	29.7695	30.0326	29.5146	29.6672
Tb427_110033400	Tb427_110033400.1	http://tritrypdb.org/tritrypdb/processQuestion.do?questionFullName=GeneQuestions.GeneByLocusTag&questionSubmit=Get+Answer&ds_gene_ids_data=Tb427_110033400.1	Tb427_110033400	Tb427_110033400	Tb927.11.2840:mRNA-p1	Tb927.11.2840:mRNA-p1	Acid Phosphatase, putative	7	7	7	53.1	22.354	194	29.4581	29.6664	29.4605	29.1399	29.2891	29.3164	29.3464	29.0201	28.9254	28.7958	29.5113	29.2227	28.5184	28.6889	28.6826	28.8026	28.2332	27.5348	28.2552	28.6781	27.8627	28.0614	28.436	28.1152	29.4581	29.6664	29.4605	29.1399	29.2891	29.3164	29.3464	29.0201	28.9254	28.7958	29.5113	29.2227
Tb427_100148200	Tb427_100148200.1	http://tritrypdb.org/tritrypdb/processQuestion.do?questionFullName=GeneQuestions.GeneByLocusTag&questionSubmit=Get+Answer&ds_gene_ids_data=Tb427_100148200.1	Tb427_100148200	Tb427_100148200	Tb927.10.14000:mRNA-p1	Tb927.10.14000:mRNA-p1	Aconitase family (aconitate hydratase)/Aconitase C-terminal domain containing protein, putative	67	67	66	85.1	98.314	897	35.1443	35.3937	35.025	34.762	36.0382	36.1384	35.8357	35.9939	36.1571	36.3362	36.2292	36.3524	36.3207	36.5286	36.2384	36.4362	36.118	36.6062	36.2922	36.5886	36.4663	36.7019	36.4771	36.6425	35.1443	35.3937	35.025	34.762	36.0382	36.1384	35.8357	35.9939	36.1571	36.3362	36.2292	36.3524
Tb427_100167600	Tb427_100167600.1	http://tritrypdb.org/tritrypdb/processQuestion.do?questionFullName=GeneQuestions.GeneByLocusTag&questionSubmit=Get+Answer&ds_gene_ids_data=Tb427_100167600.1	Tb427_100167600	Tb427_100167600	Tb927.10.15800:mRNA-p1	Tb927.10.15800:mRNA-p1;Tb927.9.8850:mRNA-p1;Tb927.9.8880:mRNA-p1;Tb927.9.5350:mRNA-p1;Tb927.11.10110:mRNA-p1;Tb927.11.3880:mRNA-p1;Tb927.9.5440:mRNA-p1	Actin, putative	9	9	9	24.2	44.982	400	25.9564	26.3792	26.7345		26.529	26.4646	26.4356	26.5277	26.4076		26.0653	26.1069	26.4605		25.8945	26.2937	26.2664		26.0394	26.1549		27.0064	25.7117	26.3232	25.9564	26.3792	26.7345	24.8418	26.529	26.4646	26.4356	26.5277	26.4076	24.735	26.0653	26.1069
Tb427_090030500	Tb427_090030500.1	http://tritrypdb.org/tritrypdb/processQuestion.do?questionFullName=GeneQuestions.GeneByLocusTag&questionSubmit=Get+Answer&ds_gene_ids_data=Tb427_090030500.1	Tb427_090030500	Tb427_090030500	Tb927.9.5440:mRNA-p1	Tb927.9.5440:mRNA-p1;Tb927.9.8850:mRNA-p1;Tb927.9.8880:mRNA-p1;Tb927.11.10110:mRNA-p1;Tb927.10.15800:mRNA-p1;Tb927.11.3880:mRNA-p1;Tb927.9.5350:mRNA-p1;Tb927.3.3020:mRNA-p1	Actin, putative	17	17	17	54.2	46.763	421	28.5031	28.7276	28.6678	28.4869	29.1894	29.0048	28.9158	28.9473	29.1074	29.0367	28.882	28.8982	28.879	28.7791	29.3005	28.8302	29.122	28.8895	29.3642	28.9495	29.2029	29.002	29.413	29.3574	28.5031	28.7276	28.6678	28.4869	29.1894	29.0048	28.9158	28.9473	29.1074	29.0367	28.882	28.8982
Tb427_040011700	Tb427_040011700.1	http://tritrypdb.org/tritrypdb/processQuestion.do?questionFullName=GeneQuestions.GeneByLocusTag&questionSubmit=Get+Answer&ds_gene_ids_data=Tb427_040011700.1	Tb427_040011700	Tb427_040011700	Tb927.4.980:mRNA-p1	Tb927.4.980:mRNA-p1;Tb927.11.3880:mRNA-p1;Tb927.9.8850:mRNA-p1;Tb927.9.8880:mRNA-p1;Tb927.11.10110:mRNA-p1;Tb927.10.15800:mRNA-p1	Actin, putative	6	6	6	20.2	40.371	372	26.1248	25.8678		26.4423	26.1664	26.1417	26.3094	25.7866	26.3162		26.1033		25.7798	26.3102	26.4109	25.9935	26.4192	25.8696	26.1501	25.9659	25.8895	26.0476	25.6436	26.3237	26.1248	25.8678	24.7865	26.4423	26.1664	26.1417	26.3094	25.7866	26.3162	24.3535	26.1033	24.8801
Tb427_090049800	Tb427_090049800.1;Tb427_090049700.1	http://tritrypdb.org/tritrypdb/processQuestion.do?questionFullName=GeneQuestions.GeneByLocusTag&questionSubmit=Get+Answer&ds_gene_ids_data=Tb427_090049800.1,Tb427_090049700.1	Tb427_090049800;Tb427_090049700	Tb427_090049800	Tb927.9.8850:mRNA-p1	Tb927.9.8850:mRNA-p1;Tb927.9.8880:mRNA-p1;Tb927.10.15800:mRNA-p1;Tb927.11.3880:mRNA-p1;Tb927.9.5350:mRNA-p1;Tb927.11.10110:mRNA-p1;Tb927.9.5440:mRNA-p1;Tb927.3.3020:mRNA-p1;Tb927.4.980:mRNA-p1;Tb927.10.2000.1:mRNA-p1;Tb927.10.2000.2:mRNA-p1	Actin, putative	27	27	27	73.9	41.895	376	34.0602	33.8182	33.9927	33.7634	34.2607	33.9075	34.0486	34.4071	34.3143	34.1916	34.3258	34.2027	34.2695	34.1038	34.017	34.1315	34.2212	33.9902	34.0014	34.182	34.1532	33.9984	34.0613	34.3532	34.0602	33.8182	33.9927	33.7634	34.2607	33.9075	34.0486	34.4071	34.3143	34.1916	34.3258	34.2027
Tb427_110044300	Tb427_110044300.1	http://tritrypdb.org/tritrypdb/processQuestion.do?questionFullName=GeneQuestions.GeneByLocusTag&questionSubmit=Get+Answer&ds_gene_ids_data=Tb427_110044300.1	Tb427_110044300	Tb427_110044300	Tb927.11.3880:mRNA-p1	Tb927.11.3880:mRNA-p1;Tb927.9.8850:mRNA-p1;Tb927.9.8880:mRNA-p1;Tb927.11.10110:mRNA-p1;Tb927.10.15800:mRNA-p1;Tb927.9.5350:mRNA-p1;Tb927.4.980:mRNA-p1;Tb927.9.5440:mRNA-p1;Tb927.3.3020:mRNA-p1	Actin, putative	14	14	14	43.4	47.559	433	29.2612	29.3323	28.9285	29.0933	29.1565	29.2758	29.0731	28.848	29.2681	28.9988	29.233	28.9643	29.1375	28.9066	29.224	29.1442	29.2444	28.8196	29.1954	29.01	29.2684	28.8794	29.3043	29.0261	29.2612	29.3323	28.9285	29.0933	29.1565	29.2758	29.0731	28.848	29.2681	28.9988	29.233	28.9643
Tb427_110109700	Tb427_110109700.1	http://tritrypdb.org/tritrypdb/processQuestion.do?questionFullName=GeneQuestions.GeneByLocusTag&questionSubmit=Get+Answer&ds_gene_ids_data=Tb427_110109700.1	Tb427_110109700	Tb427_110109700	Tb927.11.10110:mRNA-p1	Tb927.11.10110:mRNA-p1;Tb927.9.8850:mRNA-p1;Tb927.9.8880:mRNA-p1;Tb927.11.3880:mRNA-p1;Tb927.9.5350:mRNA-p1;Tb927.10.15800:mRNA-p1;Tb927.9.5440:mRNA-p1;Tb927.3.3020:mRNA-p1;Tb927.4.980:mRNA-p1	Actin, putative	9	9	9	31	43.454	394	28.1076	27.9783	27.5194		27.742	27.8638	27.5272		27.8683	27.6709	27.5045	27.4605	27.8178	27.8358	27.4852	27.7077	27.8185	27.9516	28.048	27.8733	27.7084	28.1049	27.8317	27.9348	28.1076	27.9783	27.5194	25.3239	27.742	27.8638	27.5272	24.9248	27.8683	27.6709	27.5045	27.4605
Tb427_100145200	Tb427_100145200.1	http://tritrypdb.org/tritrypdb/processQuestion.do?questionFullName=GeneQuestions.GeneByLocusTag&questionSubmit=Get+Answer&ds_gene_ids_data=Tb427_100145200.1	Tb427_100145200	Tb427_100145200	Tb927.10.13710:mRNA-p1	Tb927.10.13710:mRNA-p1	Activator of Hsp90 ATPase, N-terminal/Activator of Hsp90 ATPase homolog 1-like protein, putative	11	11	11	36	37.686	331	30.4475	30.4536	30.3586	29.9919	30.2895	29.7694	30.0144	29.8844	29.9966	30.0033	29.4748	29.065	30.0133	30.1187	29.4642	29.4678	29.8858	29.6625	29.6218	29.8774	29.4481	29.663	29.2214	29.9577	30.4475	30.4536	30.3586	29.9919	30.2895	29.7694	30.0144	29.8844	29.9966	30.0033	29.4748	29.065
Tb427_070073700	Tb427_070073700.1	http://tritrypdb.org/tritrypdb/processQuestion.do?questionFullName=GeneQuestions.GeneByLocusTag&questionSubmit=Get+Answer&ds_gene_ids_data=Tb427_070073700.1	Tb427_070073700	Tb427_070073700	Tb927.7.6770:mRNA-p1	Tb927.7.6770:mRNA-p1;Tb927.11.12830:mRNA-p1;Tb927.4.2010:mRNA-p1;Tb927.11.3520:mRNA-p1	Acyl CoA binding protein, putative	9	9	9	88.7	10.932	97	29.8955	29.7619	29.6632	29.918	29.9796	29.7877	29.7492	29.7835	30.1864	29.9459	29.9852	30.1133	30.1123	30.4959	30.3286	30.3792	30.371	30.8957	30.5934	30.6224	30.5781	30.3358	30.6795	30.3663	29.8955	29.7619	29.6632	29.918	29.9796	29.7877	29.7492	29.7835	30.1864	29.9459	29.9852	30.1133
Tb427_040022400	Tb427_040022400.1	http://tritrypdb.org/tritrypdb/processQuestion.do?questionFullName=GeneQuestions.GeneByLocusTag&questionSubmit=Get+Answer&ds_gene_ids_data=Tb427_040022400.1	Tb427_040022400	Tb427_040022400	Tb927.4.2010:mRNA-p1	Tb927.4.2010:mRNA-p1;Tb927.7.6770:mRNA-p1;Tb927.11.12830:mRNA-p1	Acyl CoA binding protein, putative	4	4	4	34.4	10.569	93	29.2224	28.9427	29.2938	29.3877	29.2448	28.9313	29.1313	29.0056	29.2532	29.2303	29.1185	29.3613	29.2382	29.5615	29.362	29.4813	29.5643	29.5821	29.4786	29.6215	29.4874	29.1443	29.4522	29.9471	29.2224	28.9427	29.2938	29.3877	29.2448	28.9313	29.1313	29.0056	29.2532	29.2303	29.1185	29.3613
Tb427_110145100	Tb427_110145100.1	http://tritrypdb.org/tritrypdb/processQuestion.do?questionFullName=GeneQuestions.GeneByLocusTag&questionSubmit=Get+Answer&ds_gene_ids_data=Tb427_110145100.1	Tb427_110145100	Tb427_110145100	Tb927.11.12830:mRNA-p1	Tb927.11.12830:mRNA-p1;Tb927.7.6770:mRNA-p1;Tb927.4.2010:mRNA-p1	Acyl CoA binding protein, putative	13	13	13	23.4	84.697	778	28.2487	28.1497	27.9493	28.125	27.8619	27.7138	27.5941	27.6357	27.8683	27.4768	27.3691	27.5952	28.0105	27.6291	27.5358	27.1149	26.8335	27.0553	27.1324	27.536	26.6988	27.3438	27.0163		28.2487	28.1497	27.9493	28.125	27.8619	27.7138	27.5941	27.6357	27.8683	27.4768	27.3691	27.5952
Tb427_090068600	Tb427_090068600.1	http://tritrypdb.org/tritrypdb/processQuestion.do?questionFullName=GeneQuestions.GeneByLocusTag&questionSubmit=Get+Answer&ds_gene_ids_data=Tb427_090068600.1	Tb427_090068600	Tb427_090068600	Tb927.9.11900:mRNA-p1	Tb927.9.11900:mRNA-p1	Acyl transferase domain containing protein, putative	13	13	13	38	60.694	550	27.0658	26.9679	26.8585	27.3036	27.2611	27.392	27.0404	27.0596	27.5339	27.4325	27.3167	27.4827	27.6168	27.6244	27.3514	27.3106	27.5998	28.0205	27.6629	27.4964	27.6395	27.7819	27.9594	27.8667	27.0658	26.9679	26.8585	27.3036	27.2611	27.392	27.0404	27.0596	27.5339	27.4325	27.3167	27.4827
Tb427_080016500	Tb427_080016500.1	http://tritrypdb.org/tritrypdb/processQuestion.do?questionFullName=GeneQuestions.GeneByLocusTag&questionSubmit=Get+Answer&ds_gene_ids_data=Tb427_080016500.1	Tb427_080016500	Tb427_080016500	Tb927.8.1420:mRNA-p1	Tb927.8.1420:mRNA-p1	Acyl-CoA dehydrogenase, N-terminal domain containing protein, putative	20	20	20	41.4	56.012	519	30.3696	30.1295	30.2797	30.0732	30.2468	30.2587	30.2188	30.3486	30.2663	30.4495	30.2445	30.364	30.4787	30.4007	30.3122	30.4363	30.2873	30.5488	30.4651	30.3513	30.3711	30.3584	30.3788	30.4206	30.3696	30.1295	30.2797	30.0732	30.2468	30.2587	30.2188	30.3486	30.2663	30.4495	30.2445	30.364
Tb427_110020100	Tb427_110020100.1	http://tritrypdb.org/tritrypdb/processQuestion.do?questionFullName=GeneQuestions.GeneByLocusTag&questionSubmit=Get+Answer&ds_gene_ids_data=Tb427_110020100.1	Tb427_110020100	Tb427_110020100	Tb927.11.1540:mRNA-p1	Tb927.11.1540:mRNA-p1	Acyl-CoA dehydrogenase, N-terminal domain/Acyl-CoA dehydrogenase, middle domain/Acyl-CoA dehydrogenase, C-terminal domain containing protein, putative	19	19	19	62.3	44.777	411	31.2787	31.3492	31.1504	30.9079	31.3974	31.4694	31.376	31.4719	31.5202	31.7697	31.5237	31.58	31.7622	31.8406	31.8731	31.8966	31.7736	32.3625	32.2714	32.313	32.1908	32.1795	32.2879	32.4922	31.2787	31.3492	31.1504	30.9079	31.3974	31.4694	31.376	31.4719	31.5202	31.7697	31.5237	31.58
Tb427_020025100	Tb427_020025100.1	http://tritrypdb.org/tritrypdb/processQuestion.do?questionFullName=GeneQuestions.GeneByLocusTag&questionSubmit=Get+Answer&ds_gene_ids_data=Tb427_020025100.1	Tb427_020025100	Tb427_020025100	Tb927.2.5020:mRNA-p1	Tb927.2.5020:mRNA-p1	Acyl-CoA oxidase, putative	18	18	18	30.1	82.407	728	28.9587	28.8261	28.8423	28.8416	28.9726	29.0005	29.0027	28.7358	28.944	29.0315	29.1144	29.0264	29.0547	29.2891	29.1345	28.7974	29.0183	29.5929	29.584	29.2076	29.1723	29.5125	29.48	29.4884	28.9587	28.8261	28.8423	28.8416	28.9726	29.0005	29.0027	28.7358	28.944	29.0315	29.1144	29.0264
Tb427_030020000	Tb427_030020000.1	http://tritrypdb.org/tritrypdb/processQuestion.do?questionFullName=GeneQuestions.GeneByLocusTag&questionSubmit=Get+Answer&ds_gene_ids_data=Tb427_030020000.1	Tb427_030020000	Tb427_030020000	Tb927.3.2030.2:mRNA-p1	Tb927.3.2030.2:mRNA-p1;Tb927.3.2030.1:mRNA-p1	Acylphosphatase, putative	3	3	3	32.7	12.37	110	26.1195		26.6424		25.8565		24.7136	26.3656	26.0523	25.6211		26.3994	25.6333		26.1587		26.64	25.8041			25.9549		26.5993	26.2811	26.1195	24.2449	26.6424	24.966	25.8565	24.814	24.7136	26.3656	26.0523	25.6211	24.4992	26.3994
Tb427_030034200	Tb427_030034200.1	http://tritrypdb.org/tritrypdb/processQuestion.do?questionFullName=GeneQuestions.GeneByLocusTag&questionSubmit=Get+Answer&ds_gene_ids_data=Tb427_030034200.1	Tb427_030034200	Tb427_030034200	Tb927.3.3360:mRNA-p1	Tb927.3.3360:mRNA-p1;Tb927.10.3880:mRNA-p1	Acyltransferase, putative	7	7	7	18.7	52.662	466	26.2125	26.1297	25.8041		26.7493	26.4747	26.5567	25.8147	26.8592	26.6966	26.7523	26.6903	27.0503	26.8553	26.8928	26.8066	27.1149	27.3523	27.3639	26.6559	27.0398	27.3189	27.2146	27.0898	26.2125	26.1297	25.8041	25.15	26.7493	26.4747	26.5567	25.8147	26.8592	26.6966	26.7523	26.6903
Tb427_100036100	Tb427_100036100.1	http://tritrypdb.org/tritrypdb/processQuestion.do?questionFullName=GeneQuestions.GeneByLocusTag&questionSubmit=Get+Answer&ds_gene_ids_data=Tb427_100036100.1	Tb427_100036100	Tb427_100036100	Tb927.10.3100:mRNA-p1	Tb927.10.3100:mRNA-p1	Acyltransferase, putative	14	14	14	26.2	78.171	698	26.9666	26.812	26.2901	26.9777	27.4503	27.3353	27.1376	27.1628	27.4244	27.2199	27.0944	27.3769	27.1324	27.3403	27.2071	27.3582	27.0877	27.6917	27.4778	27.0899	27.3102	27.5625	27.4432	26.6486	26.9666	26.812	26.2901	26.9777	27.4503	27.3353	27.1376	27.1628	27.4244	27.2199	27.0944	27.3769
Tb427_050029000	Tb427_050029000.1	http://tritrypdb.org/tritrypdb/processQuestion.do?questionFullName=GeneQuestions.GeneByLocusTag&questionSubmit=Get+Answer&ds_gene_ids_data=Tb427_050029000.1	Tb427_050029000	Tb427_050029000	Tb927.5.2280:mRNA-p1	Tb927.5.2280:mRNA-p1	Acyltransferase, putative	6	6	6	18.7	49.736	434	26.7483	26.1399	25.7595		26.3736	25.9209	26.3366	25.8949	26.4456	26.1015	25.9746	26.2855	26.0958	25.9432	26.381	25.8945	26.0871	26.4442	25.4583	25.7315	26.1695	26.2191	26.011	25.745	26.7483	26.1399	25.7595	24.9317	26.3736	25.9209	26.3366	25.8949	26.4456	26.1015	25.9746	26.2855
Tb427_040034100	Tb427_040034100.1	http://tritrypdb.org/tritrypdb/processQuestion.do?questionFullName=GeneQuestions.GeneByLocusTag&questionSubmit=Get+Answer&ds_gene_ids_data=Tb427_040034100.1	Tb427_040034100	Tb427_040034100	Tb927.4.3160:mRNA-p1	Tb927.4.3160:mRNA-p1	Acyltransferase, putative	43	43	43	38	137.12	1242	30.0912	30.1654	30.0965	30.0793	30.2437	30.3082	30.2887	30.1338	30.1409	30.3425	30.1481	30.0574	30.0851	30.3169	30.2818	30.1287	30.195	30.6825	30.1126	30.2495	30.1739	30.6569	30.2878	30.0496	30.0912	30.1654	30.0965	30.0793	30.2437	30.3082	30.2887	30.1338	30.1409	30.3425	30.1481	30.0574
Tb427_110170000	Tb427_110170000.1	http://tritrypdb.org/tritrypdb/processQuestion.do?questionFullName=GeneQuestions.GeneByLocusTag&questionSubmit=Get+Answer&ds_gene_ids_data=Tb427_110170000.1	Tb427_110170000	Tb427_110170000	Tb927.11.15150:mRNA-p1	Tb927.11.15150:mRNA-p1;Tb927.3.4820:mRNA-p1	Acyltransferase, putative	11	11	11	55	30.287	271	30.8095	31.2235	30.8163	31.1957	30.9876	31.0449	30.7649	31.0364	30.9853	30.8953	30.8625	30.9913	31.0982	30.9591	30.4038	30.9766	30.8388	31.0359	30.9751	30.6216	30.4905	30.738	30.9134	30.2749	30.8095	31.2235	30.8163	31.1957	30.9876	31.0449	30.7649	31.0364	30.9853	30.8953	30.8625	30.9913
Tb427_030051600	Tb427_030051600.1	http://tritrypdb.org/tritrypdb/processQuestion.do?questionFullName=GeneQuestions.GeneByLocusTag&questionSubmit=Get+Answer&ds_gene_ids_data=Tb427_030051600.1	Tb427_030051600	Tb427_030051600	Tb927.3.4820:mRNA-p1	Tb927.3.4820:mRNA-p1;Tb927.11.15150:mRNA-p1	Acyltransferase, putative	7	7	7	26.2	34.629	305	28.8679	28.7681	28.5623	28.5988	28.5265	28.5562	28.4145	28.3284	29.0208	28.6378	28.3829	28.9609	28.6744	28.7373	28.6475	28.752	28.8101	28.9418	29.0056	28.3429	28.5424	28.4991	28.7363	28.3853	28.8679	28.7681	28.5623	28.5988	28.5265	28.5562	28.4145	28.3284	29.0208	28.6378	28.3829	28.9609
Tb427_050042600	Tb427_050042600.1	http://tritrypdb.org/tritrypdb/processQuestion.do?questionFullName=GeneQuestions.GeneByLocusTag&questionSubmit=Get+Answer&ds_gene_ids_data=Tb427_050042600.1	Tb427_050042600	Tb427_050042600	Tb927.5.3610:mRNA-p1	Tb927.5.3610:mRNA-p1;Tb927.4.760:mRNA-p1;Tb927.6.2960:mRNA-p1;Tb927.1.2570:mRNA-p1	Adaptin N terminal region containing protein, putative	36	36	36	35.3	125.48	1127	29.6086	29.4904	29.2059	29.2102	29.4851	29.5686	29.3729	29.2729	29.4307	29.4389	29.4256	29.5135	29.4694	29.5641	29.3882	29.6569	29.4638	29.5353	29.3626	29.4759	29.3716	29.6087	29.3358	29.2701	29.6086	29.4904	29.2059	29.2102	29.4851	29.5686	29.3729	29.2729	29.4307	29.4389	29.4256	29.5135
Tb427_060034700	Tb427_060034700.1	http://tritrypdb.org/tritrypdb/processQuestion.do?questionFullName=GeneQuestions.GeneByLocusTag&questionSubmit=Get+Answer&ds_gene_ids_data=Tb427_060034700.1	Tb427_060034700	Tb427_060034700	Tb927.6.2960:mRNA-p1	Tb927.6.2960:mRNA-p1;Tb927.4.760:mRNA-p1;Tb927.5.3610:mRNA-p1	Adaptin N terminal region/Adaptin AP4 complex epsilon appendage platform, putative	12	12	12	13.9	114.21	1025			26.3366	28.2052	26.1791		26.2302	26.4343	26.573	26.3898	26.8566	26.9472	27.49	26.4859	26.4702	27.1117	27.312	27.3103	26.957	27.0912	26.606	27.3466	26.486	27.2051	24.4212	24.5732	26.3366	28.2052	26.1791	24.4531	26.2302	26.4343	26.573	26.3898	26.8566	26.9472
Tb427_040009500	Tb427_040009500.1	http://tritrypdb.org/tritrypdb/processQuestion.do?questionFullName=GeneQuestions.GeneByLocusTag&questionSubmit=Get+Answer&ds_gene_ids_data=Tb427_040009500.1	Tb427_040009500	Tb427_040009500	Tb927.4.760:mRNA-p1	Tb927.4.760:mRNA-p1;Tb927.6.2960:mRNA-p1;Tb927.5.3610:mRNA-p1;Tb927.10.9230:mRNA-p1	Adaptin N terminal region/Adaptin C-terminal domain containing protein, putative	38	38	38	56.7	86.826	795	31.2844	31.306	31.062	31.073	31.8532	31.7221	31.6374	31.5742	31.9443	31.8087	31.7637	31.7613	31.9305	32.1578	31.8544	31.9311	31.7968	31.8125	31.7223	32.0502	31.996	31.8289	31.8458	32.5102	31.2844	31.306	31.062	31.073	31.8532	31.7221	31.6374	31.5742	31.9443	31.8087	31.7637	31.7613
Tb427_110135500	Tb427_110135500.1	http://tritrypdb.org/tritrypdb/processQuestion.do?questionFullName=GeneQuestions.GeneByLocusTag&questionSubmit=Get+Answer&ds_gene_ids_data=Tb427_110135500.1	Tb427_110135500	Tb427_110135500	Tb927.11.11900:mRNA-p1	Tb927.11.11900:mRNA-p1	Adaptin N terminal region/Coatomer gamma subunit appendage platform subdomain/Coatomer subunit gamma-1 C-terminal appendage platform, putative	44	44	44	60.1	97.586	878	31.5216	31.6057	31.5114	31.4414	31.6837	31.6886	31.6597	31.4175	31.8544	31.8057	31.5906	31.6222	31.7795	31.83	31.8355	31.8633	31.7987	31.8488	31.68	31.7075	31.8615	31.7508	31.8146	31.6712	31.5216	31.6057	31.5114	31.4414	31.6837	31.6886	31.6597	31.4175	31.8544	31.8057	31.5906	31.6222
Tb427_100099500	Tb427_100099500.1	http://tritrypdb.org/tritrypdb/processQuestion.do?questionFullName=GeneQuestions.GeneByLocusTag&questionSubmit=Get+Answer&ds_gene_ids_data=Tb427_100099500.1	Tb427_100099500	Tb427_100099500	Tb927.10.9230:mRNA-p1	Tb927.10.9230:mRNA-p1;Tb927.10.8040:mRNA-p1;Tb927.11.10650:mRNA-p1	Adaptin N terminal region/HEAT repeats/non-SMC mitotic condensation complex subunit 1/Beta2-adaptin appendage, C-terminal sub-domain, putative	10	10	10	16.6	87.304	769	26.4014	26.2181	25.6139		26.1868	26.5523	26.216		26.3365	26.2141		26.2827	26.7672	26.4209	26.9473	26.3655	26.1197	26.4842	26.1536	26.6026	26.678	26.847	26.7935	26.9792	26.4014	26.2181	25.6139	24.651	26.1868	26.5523	26.216	24.6626	26.3365	26.2141	24.229	26.2827
Tb427_100087200	Tb427_100087200.1	http://tritrypdb.org/tritrypdb/processQuestion.do?questionFullName=GeneQuestions.GeneByLocusTag&questionSubmit=Get+Answer&ds_gene_ids_data=Tb427_100087200.1	Tb427_100087200	Tb427_100087200	Tb927.10.8040:mRNA-p1	Tb927.10.8040:mRNA-p1;Tb927.10.9230:mRNA-p1;Tb927.11.10650:mRNA-p1;Tb927.1.2570:mRNA-p1	Adaptin N terminal region/non-SMC mitotic condensation complex subunit 1, putative	30	30	30	52.8	76.278	695	30.8255	30.856	30.6372	30.7168	31.3794	31.4224	31.2628	30.9605	31.4075	31.5113	31.384	31.3098	31.5884	31.8054	31.5409	31.428	31.6815	31.5743	31.3677	31.8616	31.667	31.6617	31.4014	32.1923	30.8255	30.856	30.6372	30.7168	31.3794	31.4224	31.2628	30.9605	31.4075	31.5113	31.384	31.3098
Tb427_110121800	Tb427_110121800.1	http://tritrypdb.org/tritrypdb/processQuestion.do?questionFullName=GeneQuestions.GeneByLocusTag&questionSubmit=Get+Answer&ds_gene_ids_data=Tb427_110121800.1	Tb427_110121800	Tb427_110121800	Tb927.11.10650:mRNA-p1	Tb927.11.10650:mRNA-p1;Tb927.10.8040:mRNA-p1;Tb927.10.9230:mRNA-p1	Adaptin N terminal region/non-SMC mitotic condensation complex subunit 1, putative	25	25	25	37.1	100.57	919	28.2258	28.1781	28.1337	28.3676	28.1632	28.2442	28.1659	28.404	28.288	27.9241	27.9726	28.3692	28.3908	28.3268	28.2852	28.4308	28.0857	28.2349	28.242	28.5615	27.9487	28.2172	27.9655	28.0993	28.2258	28.1781	28.1337	28.3676	28.1632	28.2442	28.1659	28.404	28.288	27.9241	27.9726	28.3692
Tb427_010019800	Tb427_010019800.1	http://tritrypdb.org/tritrypdb/processQuestion.do?questionFullName=GeneQuestions.GeneByLocusTag&questionSubmit=Get+Answer&ds_gene_ids_data=Tb427_010019800.1	Tb427_010019800	Tb427_010019800	Tb927.1.2570:mRNA-p1	Tb927.1.2570:mRNA-p1;Tb927.5.3610:mRNA-p1;Tb927.10.8040:mRNA-p1	Adaptin N terminal region/non-SMC mitotic condensation complex subunit 1/Coatomer beta C-terminal region/Coatomer beta subunit appendage platform, putative	52	52	52	65.6	110.06	982	31.9944	31.9882	31.7564	31.9435	32.0429	32.0375	31.967	31.9142	32.0424	31.9295	31.9624	31.8508	32.1289	32.1011	32.0629	32.0822	32.0414	32.0319	31.9317	32.1922	32.1315	32.2892	32.0034	32.2817	31.9944	31.9882	31.7564	31.9435	32.0429	32.0375	31.967	31.9142	32.0424	31.9295	31.9624	31.8508
Tb427_070037200	Tb427_070037200.1	http://tritrypdb.org/tritrypdb/processQuestion.do?questionFullName=GeneQuestions.GeneByLocusTag&questionSubmit=Get+Answer&ds_gene_ids_data=Tb427_070037200.1	Tb427_070037200	Tb427_070037200	Tb927.7.3180:mRNA-p1	Tb927.7.3180:mRNA-p1;Tb927.8.7050:mRNA-p1;Tb927.4.2020:mRNA-p1	Adaptor complexes medium subunit family, putative	24	24	24	59.3	49.235	432	29.4976	29.6741	29.5265	29.4529	30.3262	30.2125	30.075	29.9538	30.1849	30.2825	30.0776	30.0107	30.4079	30.5935	30.1591	30.274	30.2142	30.4679	30.4133	30.4596	30.5034	30.5202	30.5034	30.7145	29.4976	29.6741	29.5265	29.4529	30.3262	30.2125	30.075	29.9538	30.1849	30.2825	30.0776	30.0107
Tb427_040022500	Tb427_040022500.1	http://tritrypdb.org/tritrypdb/processQuestion.do?questionFullName=GeneQuestions.GeneByLocusTag&questionSubmit=Get+Answer&ds_gene_ids_data=Tb427_040022500.1	Tb427_040022500	Tb427_040022500	Tb927.4.2020:mRNA-p1	Tb927.4.2020:mRNA-p1;Tb927.7.3180:mRNA-p1;Tb927.8.7050:mRNA-p1	Adaptor complexes medium subunit family, putative	13	13	13	32.6	48.02	426	27.4546	27.1514	27.3637	27.4143	27.8008	27.3023	27.4561	27.2905	27.4368	27.6252	27.4569	27.3361	27.7673	27.8495	27.3844	27.6209	27.4808	27.6066	27.4547	27.2296	27.1603	27.3377	27.2758	27.3526	27.4546	27.1514	27.3637	27.4143	27.8008	27.3023	27.4561	27.2905	27.4368	27.6252	27.4569	27.3361
Tb427_110044000	Tb427_110044000.1	http://tritrypdb.org/tritrypdb/processQuestion.do?questionFullName=GeneQuestions.GeneByLocusTag&questionSubmit=Get+Answer&ds_gene_ids_data=Tb427_110044000.1	Tb427_110044000	Tb427_110044000	Tb927.11.3850:mRNA-p1	Tb927.11.3850:mRNA-p1;Tb927.9.9740:mRNA-p1;Tb927.11.15750:mRNA-p1;Tb927.9.7180:mRNA-p1	Adenosine/AMP deaminase, putative	32	32	32	25	175.55	1558	27.8209	27.9052	26.197	26.9331	28.5211	28.2885	28.502	27.48	28.8296	28.7957	28.7199	28.6759	28.9231	29.1779	28.9121	28.908	28.8452	29.3866	29.1207	28.954	29.4954	29.0349	29.1408	29.8206	27.8209	27.9052	26.197	26.9331	28.5211	28.2885	28.502	27.48	28.8296	28.7957	28.7199	28.6759
Tb427_090040300	Tb427_090040300.1	http://tritrypdb.org/tritrypdb/processQuestion.do?questionFullName=GeneQuestions.GeneByLocusTag&questionSubmit=Get+Answer&ds_gene_ids_data=Tb427_090040300.1	Tb427_090040300	Tb427_090040300	Tb927.9.7180:mRNA-p1	Tb927.9.7180:mRNA-p1;Tb927.9.9740:mRNA-p1;Tb927.11.15750:mRNA-p1;Tb927.11.3850:mRNA-p1	Adenosine/AMP deaminase, putative	41	41	40	32.5	189.76	1690	29.8584	29.596	29.2959	29.4479	29.7536	29.7922	29.5457	29.6424	29.7432	29.5449	29.3071	29.367	29.7585	29.571	29.3906	29.6914	29.7692	29.6977	29.787	29.574	29.5927	29.827	29.7654	29.5867	29.8584	29.596	29.2959	29.4479	29.7536	29.7922	29.5457	29.6424	29.7432	29.5449	29.3071	29.367
Tb427_110176000	Tb427_110176000.1	http://tritrypdb.org/tritrypdb/processQuestion.do?questionFullName=GeneQuestions.GeneByLocusTag&questionSubmit=Get+Answer&ds_gene_ids_data=Tb427_110176000.1	Tb427_110176000	Tb427_110176000	Tb927.11.15750:mRNA-p1	Tb927.11.15750:mRNA-p1;Tb927.9.7180:mRNA-p1;Tb927.9.9740:mRNA-p1;Tb927.11.3850:mRNA-p1	Adenosine/AMP deaminase, putative	35	34	34	32.7	163.2	1417	28.9178	28.835	28.7801	28.6661	29.056	28.8026	28.8101	28.7586	28.7328	28.875	28.6691	28.6165	28.9809	28.8002	28.6307	28.8006	28.567	28.956	28.6267	28.5324	28.5513	28.7886	28.586	28.222	28.9178	28.835	28.7801	28.6661	29.056	28.8026	28.8101	28.7586	28.7328	28.875	28.6691	28.6165
Tb427_090055300	Tb427_090055300.1	http://tritrypdb.org/tritrypdb/processQuestion.do?questionFullName=GeneQuestions.GeneByLocusTag&questionSubmit=Get+Answer&ds_gene_ids_data=Tb427_090055300.1	Tb427_090055300	Tb427_090055300	Tb927.9.9740:mRNA-p1	Tb927.9.9740:mRNA-p1;Tb927.9.7180:mRNA-p1;Tb927.11.15750:mRNA-p1;Tb927.11.3850:mRNA-p1	Adenosine/AMP deaminase, putative	26	26	26	20	163.31	1417	28.5686	28.4184	28.2041	28.644	28.4249	28.3921	28.216	28.0664	28.341	28.2604	28.196	28.1883	28.5421	28.4841	28.2315	28.2091	28.4104	28.3077	28.5429	28.1401	27.8581	28.1872	28.3397	28.1294	28.5686	28.4184	28.2041	28.644	28.4249	28.3921	28.216	28.0664	28.341	28.2604	28.196	28.1883
Tb427_060049200	Tb427_060049200.1	http://tritrypdb.org/tritrypdb/processQuestion.do?questionFullName=GeneQuestions.GeneByLocusTag&questionSubmit=Get+Answer&ds_gene_ids_data=Tb427_060049200.1	Tb427_060049200	Tb427_060049200	Tb927.6.4410:mRNA-p1	Tb927.6.4410:mRNA-p1;Tb927.6.4460:mRNA-p1;Tb11.v5.0903.1-p1;Tb927.6.4470:mRNA-p1	Adenosylmethionine decarboxylase, putative	12	12	1	38.9	41.748	370	29.8246	29.7882	29.7717	29.5565	29.3349	29.8739	29.3285	29.0812	28.7023	29.1545	28.8559	28.6415	28.7917	29.023	28.8154	28.5219	28.7183	28.3441	28.5172	28.729	28.1851	28.1417	28.1303	28.3467	29.8246	29.7882	29.7717	29.5565	29.3349	29.8739	29.3285	29.0812	28.7023	29.1545	28.8559	28.6415
Tb427_110064500	Tb427_110064500.1	http://tritrypdb.org/tritrypdb/processQuestion.do?questionFullName=GeneQuestions.GeneByLocusTag&questionSubmit=Get+Answer&ds_gene_ids_data=Tb427_110064500.1	Tb427_110064500	Tb427_110064500	Tb927.11.5940:mRNA-p1	Tb927.11.5940:mRNA-p1;Tb927.11.140:mRNA-p1;Tb927.11.1480:mRNA-p1;Tb927.11.150:mRNA-p1;Tb927.6.790:mRNA-p1;Tb927.6.430:mRNA-p1;Tb927.6.780:mRNA-p1;Tb927.6.770:mRNA-p1;Tb927.6.760:mRNA-p1;Tb927.6.800:mRNA-p1;Tb927.5.320:mRNA-p1;Tb927.5.285b:mRNA-p1;Tb11.v5.0209.1-p1;Tb927.6.200:mRNA-p1;Tb927.6.180:mRNA-p1;Tb11.v5.0456.1-p1;Tb927.6.170:mRNA-p1;Tb927.5.330:mRNA-p1;Tb11.v5.0281.1-p1;Tb927.6.330:mRNA-p…	Adenylate and Guanylate cyclase catalytic domain containing protein, putative	17	16	15	20.3	137.57	1244	25.8623	26.0951		25.6364	28.2611	27.1584	27.2732	27.9328	28.484	27.7245	27.9522	28.4086	27.973	27.6154	26.7571	28.1013	26.8902	25.7478	25.8285	27.5435	25.4603		25.9053	26.4535	25.8623	26.0951	24.3037	25.6364	28.2611	27.1584	27.2732	27.9328	28.484	27.7245	27.9522	28.4086
Tb427_040047200	Tb427_040047200.1;Tb427_040047300.1;Tb427_040047400.1;Tb427_040047500.1	http://tritrypdb.org/tritrypdb/processQuestion.do?questionFullName=GeneQuestions.GeneByLocusTag&questionSubmit=Get+Answer&ds_gene_ids_data=Tb427_040047200.1,Tb427_040047300.1,Tb427_040047400.1,Tb427_040047500.1	Tb427_040047200;Tb427_040047300;Tb427_040047400:pseudogene;Tb427_040047500	Tb427_040047200	Tb927.4.4450:mRNA-p1;Tb927.4.4430:mRNA-p1;Tb927.4.4440:mRNA-p1	Tb927.4.4450:mRNA-p1;Tb927.4.4430:mRNA-p1;Tb927.4.4440:mRNA-p1;Tb927.4.4410:mRNA-p1;Tb927.7.7520:mRNA-p1;Tb927.7.7530:mRNA-p1;Tb927.4.4460:mRNA-p1;Tb927.4.4470:mRNA-p1;Tb927.8.7930:mRNA-p1;Tb927.8.7920:mRNA-p1;Tb927.8.7870:mRNA-p1;Tb927.8.7890:mRNA-p1;Tb927.8.7860:mRNA-p1;Tb927.8.7900:mRNA-p1;Tb11.v5.0429.1-p1;Tb927.8.7940:mRNA-p1;Tb927.8.7590:mRNA-p1;Tb927.4.3750:mRNA-p1;Tb927.4.3870:mRNA-p1;Tb9…	Adenylate and Guanylate cyclase catalytic domain containing protein, putative	16	6	2	17.1	127.18	1145									25.5552	26.529			25.8057			25.4937	25.4219		26.0717		25.7288	25.7817	25.8292	25.782	24.4317	24.4913	24.9521	24.9724	24.7063	24.9449	24.6151	25.2576	25.5552	26.529	24.6088	24.2947
Tb427_060005200	Tb427_060005200.1;Tb427_060007300.1;Tb427_060007000.1	http://tritrypdb.org/tritrypdb/processQuestion.do?questionFullName=GeneQuestions.GeneByLocusTag&questionSubmit=Get+Answer&ds_gene_ids_data=Tb427_060005200.1,Tb427_060007300.1,Tb427_060007000.1	Tb427_060005200;Tb427_060007300:pseudogene;Tb427_060007000:pseudogene	Tb427_060005200	Tb927.6.200:mRNA-p1;Tb927.6.320:pseudogenic_transcript-p1	Tb927.6.200:mRNA-p1;Tb927.6.280:mRNA-p1;Tb927.6.300:mRNA-p1;Tb927.6.170:mRNA-p1;Tb927.6.330:mRNA-p1;Tb927.6.310:mRNA-p1;Tb927.6.180:mRNA-p1;Tb11.v5.0456.1-p1;Tb927.6.430:mRNA-p1;Tb927.6.760:mRNA-p1;Tb927.6.790:mRNA-p1;Tb927.6.780:mRNA-p1;Tb927.6.770:mRNA-p1;Tb927.6.800:mRNA-p1;Tb927.5.285b:mRNA-p1;Tb11.v5.0209.1-p1;Tb927.5.320:mRNA-p1;Tb927.11.1480:mRNA-p1;Tb11.v5.0576.1-p1;Tb927.5.330:mRNA-p1;Tb…	Adenylate and Guanylate cyclase catalytic domain containing protein, putative	20	16	7	19.7	139.69	1254	28.9642	28.9362	28.1275	28.2807	28.6233	28.9058	28.5438	28.2722	28.6519	28.5613	28.0904	28.4549	28.2482	28.4861	28.1043	28.7128	27.7283	27.2741	27.5663	27.4927	26.7693	26.6776	26.2651	26.4466	28.9642	28.9362	28.1275	28.2807	28.6233	28.9058	28.5438	28.2722	28.6519	28.5613	28.0904	28.4549
Tb427_100137600:pseudogene	Tb427_100137600.1	http://tritrypdb.org/tritrypdb/processQuestion.do?questionFullName=GeneQuestions.GeneByLocusTag&questionSubmit=Get+Answer&ds_gene_ids_data=Tb427_100137600.1	Tb427_100137600:pseudogene	Tb427_100137600:pseudogene	Tb927.10.13040:mRNA-p1	Tb927.10.13040:mRNA-p1;Tb927.7.7470:mRNA-p1;Tb927.10.2430:mRNA-p1;Tb927.11.17040:mRNA-p1;Tb927.6.760:mRNA-p1;Tb927.6.790:mRNA-p1;Tb927.6.770:mRNA-p1;Tb927.6.780:mRNA-p1;Tb927.10.16190:mRNA-p1;Tb927.6.800:mRNA-p1;Tb927.6.430:mRNA-p1;Tb927.6.200:mRNA-p1;Tb11.v5.0209.1-p1;Tb927.6.330:mRNA-p1;Tb927.5.285b:mRNA-p1;Tb927.5.320:mRNA-p1;Tb927.4.3750:mRNA-p1;Tb927.4.3880:mRNA-p1;Tb927.6.180:mRNA-p1;Tb11.v…	Adenylate and Guanylate cyclase catalytic domain containing protein, putative	24	23	22	26.7	129.17	1171	29.276	29.7864	28.8531	28.6836	29.3598	29.5037	29.1633	28.5696	29.4649	29.6863	29.2596	28.9924	29.6449	30.0041	29.5149	29.7511	30.1511	29.3744	29.3777	29.3028	29.6678	29.6396	29.1793	29.6989	29.276	29.7864	28.8531	28.6836	29.3598	29.5037	29.1633	28.5696	29.4649	29.6863	29.2596	28.9924
Tb427_070083400	Tb427_070083400.1	http://tritrypdb.org/tritrypdb/processQuestion.do?questionFullName=GeneQuestions.GeneByLocusTag&questionSubmit=Get+Answer&ds_gene_ids_data=Tb427_070083400.1	Tb427_070083400	Tb427_070083400	Tb927.7.7530:mRNA-p1	Tb927.7.7530:mRNA-p1;Tb927.7.7520:mRNA-p1;Tb927.4.4440:mRNA-p1;Tb927.4.4450:mRNA-p1;Tb927.4.4430:mRNA-p1;Tb927.4.4410:mRNA-p1;Tb927.4.4460:mRNA-p1;Tb927.4.4470:mRNA-p1;Tb927.8.7930:mRNA-p1;Tb927.8.7940:mRNA-p1;Tb927.8.7920:mRNA-p1;Tb927.8.7890:mRNA-p1;Tb927.8.7870:mRNA-p1;Tb927.8.7860:mRNA-p1;Tb927.8.7900:mRNA-p1;Tb11.v5.0429.1-p1;Tb927.8.7590:mRNA-p1;Tb927.4.3750:mRNA-p1;Tb927.6.330:mRNA-p1;Tb92…	Adenylate and Guanylate cyclase catalytic domain containing protein, putative	17	12	1	17.6	137.57	1241	27.5367				25.997		24.6242		25.7347	25.832		26.0359	26.3133	26.2618		25.9242	27.5472	26.6728	27.2485	26.4137	27.1563	27.0476	27.2873	27.6287	27.5367	24.2704	24.3282	24.9212	25.997	24.4175	24.6242	24.2715	25.7347	25.832	24.8232	26.0359
Tb427_060011100	Tb427_060011100.1;Tb427_060011200.1	http://tritrypdb.org/tritrypdb/processQuestion.do?questionFullName=GeneQuestions.GeneByLocusTag&questionSubmit=Get+Answer&ds_gene_ids_data=Tb427_060011100.1,Tb427_060011200.1	Tb427_060011100;Tb427_060011200	Tb427_060011100	Tb927.6.760:mRNA-p1	Tb927.6.760:mRNA-p1;Tb927.6.790:mRNA-p1;Tb927.6.780:mRNA-p1;Tb927.6.770:mRNA-p1;Tb927.6.800:mRNA-p1;Tb927.6.430:mRNA-p1;Tb927.6.200:mRNA-p1;Tb927.6.180:mRNA-p1;Tb11.v5.0456.1-p1;Tb927.6.330:mRNA-p1;Tb927.6.280:mRNA-p1;Tb927.6.170:mRNA-p1;Tb927.6.310:mRNA-p1;Tb927.6.300:mRNA-p1;Tb927.5.285b:mRNA-p1;Tb11.v5.0209.1-p1;Tb927.5.320:mRNA-p1;Tb11.v5.0576.1-p1;Tb927.11.1480:mRNA-p1;Tb927.5.330:mRNA-p1;Tb…	Adenylate and Guanylate cyclase catalytic domain containing protein, putative	12	5	1	11.6	141.95	1274	25.5586				24.3636				24.4175				25.0146	24.1219			25.6344	24.8749			25.6116	25.6024		24.4105	25.5586	24.4142	24.824	24.9352	24.3636	23.9535	24.6379	24.9443	24.4175	24.47	24.4399	24.296
Tb427_110155100	Tb427_110155100.1	http://tritrypdb.org/tritrypdb/processQuestion.do?questionFullName=GeneQuestions.GeneByLocusTag&questionSubmit=Get+Answer&ds_gene_ids_data=Tb427_110155100.1	Tb427_110155100	Tb427_110155100	Tb927.11.13740:mRNA-p1	Tb927.11.13740:mRNA-p1;Tb927.11.5940:mRNA-p1;Tb927.11.1480:mRNA-p1;Tb927.6.430:mRNA-p1;Tb927.6.770:mRNA-p1;Tb927.6.780:mRNA-p1;Tb927.6.330:mRNA-p1;Tb927.6.790:mRNA-p1;Tb927.6.760:mRNA-p1;Tb927.6.800:mRNA-p1;Tb927.6.280:mRNA-p1;Tb927.6.180:mRNA-p1;Tb11.v5.0456.1-p1;Tb927.6.300:mRNA-p1;Tb927.6.170:mRNA-p1;Tb927.11.140:mRNA-p1;Tb927.6.310:mRNA-p1;Tb927.5.285b:mRNA-p1;Tb927.6.200:mRNA-p1;Tb11.v5.0209…	Adenylate and Guanylate cyclase catalytic domain containing protein, putative	23	21	20	29.2	133.88	1214	30.4286	30.2624	30.0537	29.8078	29.4019	28.6022	29.1467	29.0993	29.4706	28.905	28.5508	28.5774	29.4828	28.4279	28.4823	28.5445	28.7828	26.0656	28.4796	28.5303	27.5872	25.9745	28.0084	27.9816	30.4286	30.2624	30.0537	29.8078	29.4019	28.6022	29.1467	29.0993	29.4706	28.905	28.5508	28.5774
Tb427_050007400	Tb427_050007400.1;Tb427_050007300.1;Tb427_050005700.1;Tb427_000174300.1	http://tritrypdb.org/tritrypdb/processQuestion.do?questionFullName=GeneQuestions.GeneByLocusTag&questionSubmit=Get+Answer&ds_gene_ids_data=Tb427_050007400.1,Tb427_050007300.1,Tb427_050005700.1,Tb427_000174300.1	Tb427_050007400;Tb427_050007300;Tb427_050005700;Tb427_000174300:pseudogene	Tb427_050007400	Tb927.5.330:mRNA-p1;Tb927.5.320:mRNA-p1;Tb927.5.285b:mRNA-p1;Tb927.11.150:mRNA-p1	Tb927.5.330:mRNA-p1;Tb11.v5.0281.1-p1;Tb927.5.320:mRNA-p1;Tb927.5.285b:mRNA-p1;Tb11.v5.0209.1-p1;Tb927.6.200:mRNA-p1;Tb927.6.760:mRNA-p1;Tb927.6.790:mRNA-p1;Tb927.6.780:mRNA-p1;Tb927.6.800:mRNA-p1;Tb927.6.770:mRNA-p1;Tb927.6.430:mRNA-p1;Tb927.6.170:mRNA-p1;Tb927.6.180:mRNA-p1;Tb11.v5.0456.1-p1;Tb927.6.330:mRNA-p1;Tb927.6.280:mRNA-p1;Tb927.6.300:mRNA-p1;Tb927.6.310:mRNA-p1;Tb927.11.5940:mRNA-p1;Tb…	Adenylate and Guanylate cyclase catalytic domain containing protein, putative	32	31	27	32.3	133.67	1206	31.5612	31.3988	31.5829	31.2653	29.968	30.0711	30.2097	30.551	29.6305	29.8107	29.6335	29.895	29.6985	29.6973	29.5184	29.7909	29.3241	29.3252	30.077	29.9892	29.2068	28.8195	29.4168	29.4313	31.5612	31.3988	31.5829	31.2653	29.968	30.0711	30.2097	30.551	29.6305	29.8107	29.6335	29.895
Tb427_100099700	Tb427_100099700.1	http://tritrypdb.org/tritrypdb/processQuestion.do?questionFullName=GeneQuestions.GeneByLocusTag&questionSubmit=Get+Answer&ds_gene_ids_data=Tb427_100099700.1	Tb427_100099700	Tb427_100099700	Tb927.10.9250:mRNA-p1	Tb927.10.9250:mRNA-p1	Adenylate cyclase associated (CAP) N terminal/Adenylate cyclase associated (CAP) C terminal, putative	17	17	17	56.1	29.36	269	31.6116	31.6454	31.4385	31.5326	31.9731	31.7517	31.946	31.7975	31.7561	31.6747	32.0565	31.7857	31.7602	32.015	31.6179	31.7952	31.9715	31.6794	31.6562	32.1209	31.9041	31.4465	31.6765	32.0081	31.6116	31.6454	31.4385	31.5326	31.9731	31.7517	31.946	31.7975	31.7561	31.6747	32.0565	31.7857
Tb427_050046400	Tb427_050046400.1	http://tritrypdb.org/tritrypdb/processQuestion.do?questionFullName=GeneQuestions.GeneByLocusTag&questionSubmit=Get+Answer&ds_gene_ids_data=Tb427_050046400.1	Tb427_050046400	Tb427_050046400	Tb927.5.3970:mRNA-p1	Tb927.5.3970:mRNA-p1;Tb927.10.830:mRNA-p1;Tb927.2.5660:mRNA-p1;Tb927.10.5760:mRNA-p1;Tb927.10.2540:mRNA-p1;Tb927.10.2530:mRNA-p1;Tb927.2.4520:mRNA-p1;Tb927.9.8450:mRNA-p1	Adenylate kinase/AAA domain containing protein, putative	19	19	19	63.1	29.858	260	30.2662	30.0897	29.8051	29.9582	29.9919	29.6494	29.8007	29.6721	30.0808	29.7661	29.7539	29.9166	30.1751	29.9303	30.0136	30.4062	30.207	30.0784	30.1875	29.9371	30.1169	30.1591	30.2994	29.774	30.2662	30.0897	29.8051	29.9582	29.9919	29.6494	29.8007	29.6721	30.0808	29.7661	29.7539	29.9166
Tb427_100061700	Tb427_100061700.1	http://tritrypdb.org/tritrypdb/processQuestion.do?questionFullName=GeneQuestions.GeneByLocusTag&questionSubmit=Get+Answer&ds_gene_ids_data=Tb427_100061700.1	Tb427_100061700	Tb427_100061700	Tb927.10.5760:mRNA-p1	Tb927.10.5760:mRNA-p1;Tb927.10.830:mRNA-p1;Tb927.10.2530:mRNA-p1;Tb927.5.3970:mRNA-p1;Tb927.9.8450:mRNA-p1;Tb927.2.5660:mRNA-p1;Tb927.10.2540:mRNA-p1;Tb927.11.3500:mRNA-p1	Adenylate kinase/AAA domain containing protein, putative	11	11	11	57.7	24.338	215	30.267	30.1652	29.8831	30.1953	29.1927	28.8287	29.0734	29.0991	28.852	28.7436	28.8728	28.8844	28.8869	28.8305	28.8957	29.0164	29.2752	29.0156	28.7701	28.4023	28.5639	28.668	28.7189	28.4824	30.267	30.1652	29.8831	30.1953	29.1927	28.8287	29.0734	29.0991	28.852	28.7436	28.8728	28.8844
Tb427_100029700	Tb427_100029700.1	http://tritrypdb.org/tritrypdb/processQuestion.do?questionFullName=GeneQuestions.GeneByLocusTag&questionSubmit=Get+Answer&ds_gene_ids_data=Tb427_100029700.1	Tb427_100029700	Tb427_100029700	Tb927.10.2540:mRNA-p1	Tb927.10.2540:mRNA-p1;Tb927.10.2530:mRNA-p1;Tb927.2.5660:mRNA-p1;Tb927.10.830:mRNA-p1;Tb927.5.3970:mRNA-p1;Tb927.10.5760:mRNA-p1;Tb927.11.3500:mRNA-p1;Tb927.9.8450:mRNA-p1	Adenylate kinase/AAA domain/Adenylate kinase, active site lid, putative	8	8	8	52	25.656	229		25.9716	26.3078		26.4174	26.304	26.0959	26.1358	26.1845	26.1732	26.3805	26.1986	26.9594	26.3458	26.5236	26.6645	26.742	26.7861	26.7745	26.9086	27.2841	26.9252	27.1309	27.5197	24.6422	25.9716	26.3078	24.8553	26.4174	26.304	26.0959	26.1358	26.1845	26.1732	26.3805	26.1986
Tb427_110042100	Tb427_110042100.1	http://tritrypdb.org/tritrypdb/processQuestion.do?questionFullName=GeneQuestions.GeneByLocusTag&questionSubmit=Get+Answer&ds_gene_ids_data=Tb427_110042100.1	Tb427_110042100	Tb427_110042100	Tb927.11.3650:mRNA-p1	Tb927.11.3650:mRNA-p1;Tb11.v5.0435.1-p1	Adenylosuccinate synthetase, putative	48	48	48	81.4	66.675	602	33.5308	33.5292	33.3913	33.3439	33.2649	33.1251	33.2044	33.2246	33.3404	33.3014	33.3723	33.3039	33.3137	33.2706	33.1286	33.2288	33.1431	32.8564	33.0993	33.1846	33.0899	32.7835	33.1392	33.0671	33.5308	33.5292	33.3913	33.3439	33.2649	33.1251	33.2044	33.2246	33.3404	33.3014	33.3723	33.3039
Tb427_060028200	Tb427_060028200.1;Tb427_060027600.1;Tb427_060027000.1	http://tritrypdb.org/tritrypdb/processQuestion.do?questionFullName=GeneQuestions.GeneByLocusTag&questionSubmit=Get+Answer&ds_gene_ids_data=Tb427_060028200.1,Tb427_060027600.1,Tb427_060027000.1	Tb427_060028200;Tb427_060027600;Tb427_060027000	Tb427_060028200	Tb927.6.2270:mRNA-p1	Tb927.6.2270:mRNA-p1;Tb927.6.2330:mRNA-p1	AdoMet dependent proline di-methyltransferase/Methyltransferase domain containing protein, putative	11	11	11	60.4	28.09	250	29.4403	29.5454	29.533	29.3356	29.6712	29.4269	29.7493	29.6313	29.4315	29.4792	29.5724	29.3946	29.333	29.3792	29.4025	29.2059	29.0322	29.1145	28.9226	28.9603	28.8788	29.0566	28.8834	28.8658	29.4403	29.5454	29.533	29.3356	29.6712	29.4269	29.7493	29.6313	29.4315	29.4792	29.5724	29.3946
Tb427_100103400	Tb427_100103400.1	http://tritrypdb.org/tritrypdb/processQuestion.do?questionFullName=GeneQuestions.GeneByLocusTag&questionSubmit=Get+Answer&ds_gene_ids_data=Tb427_100103400.1	Tb427_100103400	Tb427_100103400	Tb927.10.9670:mRNA-p1	Tb927.10.9670:mRNA-p1;Tb927.10.8580:mRNA-p1;Tb927.7.6230:mRNA-p1;Tb927.9.13650:mRNA-p1;Tb927.9.13655:mRNA-p1;Tb927.9.13680:mRNA-p1;Tb927.9.13710:mRNA-p1;Tb927.9.13740:mRNA-p1;Tb927.3.3450:mRNA-p1;Tb927.9.7650:mRNA-p1;Tb927.9.7230:mRNA-p1	ADP-ribosylation factor family, putative	9	9	9	10.3	110.43	977	25.4411	25.6364	25.0993		25.6478	25.7098	25.4198		25.6887	26.0505	25.1397	25.8644	25.3788	25.5817	24.9799	25.5953	25.6712	26.0572	25.8427	25.6639	25.7271	26.2264	26.0314	25.9318	25.4411	25.6364	25.0993	24.8663	25.6478	25.7098	25.4198	25.0155	25.6887	26.0505	25.1397	25.8644
Tb427_090012000	Tb427_090012000.1	http://tritrypdb.org/tritrypdb/processQuestion.do?questionFullName=GeneQuestions.GeneByLocusTag&questionSubmit=Get+Answer&ds_gene_ids_data=Tb427_090012000.1	Tb427_090012000	Tb427_090012000	Tb927.9.2060:mRNA-p1	Tb927.9.2060:mRNA-p1;Tb927.7.6230:mRNA-p1;Tb927.5.4500:mRNA-p1;Tb05.5K5.150:mRNA-p1;Tb927.9.13650:mRNA-p1;Tb927.9.13655:mRNA-p1;Tb927.9.13680:mRNA-p1;Tb927.9.13710:mRNA-p1;Tb927.9.13740:mRNA-p1	ADP-ribosylation factor family, putative	8	8	8	33.7	37.947	353	26.9745	27.0041	26.8073	27.0929	26.6589	26.7962	26.8755	26.9116	26.7106	26.9084	26.6954	26.3663	26.6352	26.7655	26.6196	26.5797	26.7186	26.7984	26.7971	26.7822	26.5849	26.6721		26.21	26.9745	27.0041	26.8073	27.0929	26.6589	26.7962	26.8755	26.9116	26.7106	26.9084	26.6954	26.3663
Tb427_090063000	Tb427_090063000.1	http://tritrypdb.org/tritrypdb/processQuestion.do?questionFullName=GeneQuestions.GeneByLocusTag&questionSubmit=Get+Answer&ds_gene_ids_data=Tb427_090063000.1	Tb427_090063000	Tb427_090063000	Tb927.9.11000:mRNA-p1	Tb927.9.11000:mRNA-p1;Tb927.8.890:mRNA-p1;Tb927.11.13750:mRNA-p1;Tb927.11.15240:mRNA-p1;Tb927.8.4610:mRNA-p1;Tb927.8.4330:mRNA-p1;Tb927.2.2130:mRNA-p1;Tb927.10.12960:mRNA-p1;Tb927.11.4570:mRNA-p1;Tb927.10.1520:mRNA-p1;Tb927.8.4770:mRNA-p1;Tb927.8.4620:mRNA-p1;Tb927.11.6030:mRNA-p1;Tb927.11.12950:mRNA-p1;Tb927.11.15030:mRNA-p1;Tb927.9.15930:mRNA-p1;Tb09.v4.0017:mRNA-p1;Tb927.3.1120:mRNA-p1;Tb927.6…	ADP-ribosylation factor family/50S ribosome-binding GTPase/Ras of Complex, Roc, domain of DAPkinase/Gtr1/RagA G protein conserved region/Ras family, putative	10	10	10	45.5	23.832	220	30.2915	30.2964	30.0916	30.3843	30.5398	30.3681	30.4381	30.5721	30.6958	30.5866	30.5571	30.625	30.7426	30.6692	30.5193	30.7638	30.9903	30.7137	31.0671	30.9422	31.0526	30.902	30.9088	31.3657	30.2915	30.2964	30.0916	30.3843	30.5398	30.3681	30.4381	30.5721	30.6958	30.5866	30.5571	30.625
Tb427_100018200	Tb427_100018200.1	http://tritrypdb.org/tritrypdb/processQuestion.do?questionFullName=GeneQuestions.GeneByLocusTag&questionSubmit=Get+Answer&ds_gene_ids_data=Tb427_100018200.1	Tb427_100018200	Tb427_100018200	Tb927.10.1520:mRNA-p1	Tb927.10.1520:mRNA-p1;Tb927.10.12960:mRNA-p1;Tb927.2.2130:mRNA-p1;Tb927.11.15240:mRNA-p1;Tb927.8.4330:mRNA-p1;Tb927.8.890:mRNA-p1;Tb927.11.4570:mRNA-p1;Tb927.11.13750:mRNA-p1;Tb927.9.11000:mRNA-p1;Tb927.10.8560:mRNA-p1;Tb927.8.4610:mRNA-p1;Tb927.8.4620:mRNA-p1;Tb927.8.4770:mRNA-p1;Tb09.v4.0017:mRNA-p1;Tb927.9.15930:mRNA-p1;Tb927.11.12950:mRNA-p1;Tb927.11.15030:mRNA-p1;Tb927.3.1120:mRNA-p1;Tb927.1…	ADP-ribosylation factor family/50S ribosome-binding GTPase/Ras of Complex, Roc, domain of DAPkinase/Gtr1/RagA G protein conserved region/Ras family, putative	8	8	8	40.1	28.63	269	27.0528	27.5338	27.7387	27.3199	27.5507	27.4066	27.5472	27.4808	27.831	27.9098	27.8477	27.6611	27.8141	27.8997	27.7471	27.8012	27.9965	27.9409	27.9513	27.9876	27.9775	27.8286	27.9251	28.4677	27.0528	27.5338	27.7387	27.3199	27.5507	27.4066	27.5472	27.4808	27.831	27.9098	27.8477	27.6611
Tb427_110168800	Tb427_110168800.1	http://tritrypdb.org/tritrypdb/processQuestion.do?questionFullName=GeneQuestions.GeneByLocusTag&questionSubmit=Get+Answer&ds_gene_ids_data=Tb427_110168800.1	Tb427_110168800	Tb427_110168800	Tb927.11.15030:mRNA-p1	Tb927.11.15030:mRNA-p1;Tb927.9.11000:mRNA-p1;Tb927.10.1520:mRNA-p1;Tb927.11.4570:mRNA-p1;Tb927.8.890:mRNA-p1;Tb927.11.15240:mRNA-p1;Tb927.8.4610:mRNA-p1;Tb927.8.4770:mRNA-p1;Tb927.2.2130:mRNA-p1;Tb927.8.4330:mRNA-p1;Tb927.3.1120:mRNA-p1;Tb927.11.13750:mRNA-p1;Tb09.v4.0017:mRNA-p1;Tb927.9.15930:mRNA-p1;Tb927.10.8560:mRNA-p1;Tb927.10.12960:mRNA-p1;Tb927.6.3040:mRNA-p1;Tb927.8.4620:mRNA-p1;Tb927.11.…	ADP-ribosylation factor family/50S ribosome-binding GTPase/Ras of Complex, Roc, domain of DAPkinase/Gtr1/RagA G protein conserved region/Signal recognition particle receptor beta subunit/Ras family, putative	7	7	7	31.7	22.782	199	28.2222	28.1221	27.6838	28.3256	28.5514	28.2728	28.1315	28.7975	28.0159	27.9367	28.2689	28.1376	28.4121	28.1882	27.8569	28.2252	27.9016	27.5427	27.9685	27.7722	27.7495	27.7174	28.1043	27.984	28.2222	28.1221	27.6838	28.3256	28.5514	28.2728	28.1315	28.7975	28.0159	27.9367	28.2689	28.1376
Tb427_080052800	Tb427_080052800.1	http://tritrypdb.org/tritrypdb/processQuestion.do?questionFullName=GeneQuestions.GeneByLocusTag&questionSubmit=Get+Answer&ds_gene_ids_data=Tb427_080052800.1	Tb427_080052800	Tb427_080052800	Tb927.8.4770:mRNA-p1	Tb927.8.4770:mRNA-p1;Tb927.8.890:mRNA-p1;Tb927.11.15240:mRNA-p1;Tb927.2.2130:mRNA-p1;Tb927.8.4330:mRNA-p1;Tb927.8.4610:mRNA-p1;Tb927.9.11000:mRNA-p1;Tb927.11.13750:mRNA-p1;Tb927.11.4570:mRNA-p1;Tb927.11.12950:mRNA-p1;Tb927.10.12960:mRNA-p1;Tb927.10.1520:mRNA-p1;Tb927.11.15030:mRNA-p1;Tb927.8.4620:mRNA-p1;Tb927.10.8560:mRNA-p1;Tb09.v4.0017:mRNA-p1;Tb927.9.15930:mRNA-p1;Tb927.6.3040:mRNA-p1;Tb927.3…	ADP-ribosylation factor family/50S ribosome-binding GTPase/Ras of Complex, Roc, domain of DAPkinase/Ras family, putative	12	12	12	61.4	23.467	215	29.8152	30.0553	30.0101	30.0866	30.8917	30.1096	30.7725	30.4887	30.839	30.3148	30.6248	30.4886	30.7321	30.5577	30.7072	30.4856	30.328	30.4977	30.73	30.4222	30.4852	30.6029	30.6282	30.5076	29.8152	30.0553	30.0101	30.0866	30.8917	30.1096	30.7725	30.4887	30.839	30.3148	30.6248	30.4886
Tb427_080048200	Tb427_080048200.1	http://tritrypdb.org/tritrypdb/processQuestion.do?questionFullName=GeneQuestions.GeneByLocusTag&questionSubmit=Get+Answer&ds_gene_ids_data=Tb427_080048200.1	Tb427_080048200	Tb427_080048200	Tb927.8.4330:mRNA-p1	Tb927.8.4330:mRNA-p1;Tb927.8.890:mRNA-p1;Tb927.11.15240:mRNA-p1;Tb927.11.13750:mRNA-p1;Tb927.2.2130:mRNA-p1;Tb927.8.4610:mRNA-p1;Tb927.10.12960:mRNA-p1;Tb927.9.11000:mRNA-p1;Tb927.8.4620:mRNA-p1;Tb927.8.4770:mRNA-p1;Tb927.10.1520:mRNA-p1;Tb927.9.15930:mRNA-p1;Tb09.v4.0017:mRNA-p1;Tb927.11.4570:mRNA-p1;Tb927.3.1120:mRNA-p1;Tb927.10.8560:mRNA-p1;Tb927.11.15030:mRNA-p1;Tb927.6.3040:mRNA-p1;Tb927.11.…	ADP-ribosylation factor family/50S ribosome-binding GTPase/Ras of Complex, Roc, domain of DAPkinase/Ras family, putative	12	12	12	67.6	23.527	216	31.0682	31.2401	31.1868	31.1507	31.7764	31.4189	31.475	31.5345	31.8401	31.6241	31.7612	31.5134	31.8228	31.8635	31.8029	31.7318	32.089	31.9054	31.8502	31.8922	31.987	32.0333	31.9217	32.0589	31.0682	31.2401	31.1868	31.1507	31.7764	31.4189	31.475	31.5345	31.8401	31.6241	31.7612	31.5134
Tb427_110050800	Tb427_110050800.1	http://tritrypdb.org/tritrypdb/processQuestion.do?questionFullName=GeneQuestions.GeneByLocusTag&questionSubmit=Get+Answer&ds_gene_ids_data=Tb427_110050800.1	Tb427_110050800	Tb427_110050800	Tb927.11.4570:mRNA-p1	Tb927.11.4570:mRNA-p1;Tb927.10.12960:mRNA-p1;Tb927.8.890:mRNA-p1;Tb927.11.13750:mRNA-p1;Tb927.2.2130:mRNA-p1;Tb927.11.15240:mRNA-p1;Tb927.8.4610:mRNA-p1;Tb927.10.1520:mRNA-p1;Tb927.9.11000:mRNA-p1;Tb927.8.4330:mRNA-p1;Tb927.8.4770:mRNA-p1;Tb927.10.8560:mRNA-p1;Tb927.11.15030:mRNA-p1;Tb927.8.4620:mRNA-p1;Tb927.8.8140:mRNA-p1;Tb927.3.5550:mRNA-p1;Tb927.3.1120:mRNA-p1;Tb09.v4.0017:mRNA-p1;Tb927.9.15…	ADP-ribosylation factor family/50S ribosome-binding GTPase/Ras of Complex, Roc, domain of DAPkinase/Ras family, putative	9	9	9	65	21.874	203	25.9901	26.444	25.4834	26.7393	26.6878	26.3564	26.5975	26.0244	26.6827	26.7685	26.9895	26.8622	27.4396	27.0071	26.8013	27.4676	27.564	27.8894	27.5494	27.356	27.943	27.6006	27.4356	27.6562	25.9901	26.444	25.4834	26.7393	26.6878	26.3564	26.5975	26.0244	26.6827	26.7685	26.9895	26.8622
Tb427_100092300	Tb427_100092300.1	http://tritrypdb.org/tritrypdb/processQuestion.do?questionFullName=GeneQuestions.GeneByLocusTag&questionSubmit=Get+Answer&ds_gene_ids_data=Tb427_100092300.1	Tb427_100092300	Tb427_100092300	Tb927.10.8560:mRNA-p1	Tb927.10.8560:mRNA-p1;Tb927.10.1520:mRNA-p1;Tb927.2.2130:mRNA-p1;Tb927.11.4570:mRNA-p1;Tb927.11.13750:mRNA-p1;Tb927.11.15240:mRNA-p1;Tb927.8.4610:mRNA-p1;Tb927.3.1120:mRNA-p1;Tb927.8.4330:mRNA-p1;Tb927.8.890:mRNA-p1;Tb927.10.12960:mRNA-p1;Tb927.9.11000:mRNA-p1;Tb927.6.3040:mRNA-p1;Tb927.11.6030:mRNA-p1;Tb927.9.15930:mRNA-p1;Tb927.8.4770:mRNA-p1;Tb09.v4.0017:mRNA-p1;Tb927.11.15030:mRNA-p1;Tb927.8.…	ADP-ribosylation factor family/50S ribosome-binding GTPase/Ras of Complex, Roc, domain of DAPkinase/Ras family, putative	5	5	5	23	24.425	226	26.9371	27.068	26.416		26.4742	26.3477	26.5458	26.1232	26.5045	26.813	26.5387	26.344	26.8341	27.1786	26.8355	26.7585	26.7152	27.4109	26.8496	27.3247	27.2427	26.7081	26.6503	27.2679	26.9371	27.068	26.416	24.6601	26.4742	26.3477	26.5458	26.1232	26.5045	26.813	26.5387	26.344
Tb427_100056400	Tb427_100056400.1	http://tritrypdb.org/tritrypdb/processQuestion.do?questionFullName=GeneQuestions.GeneByLocusTag&questionSubmit=Get+Answer&ds_gene_ids_data=Tb427_100056400.1	Tb427_100056400	Tb427_100056400	Tb927.10.5230:mRNA-p1	Tb927.10.5230:mRNA-p1;Tb11.v5.0234.1-p1;Tb927.6.3650:mRNA-p1;Tb927.10.4250:mRNA-p1;Tb927.7.6230:mRNA-p1;Tb927.10.8580:mRNA-p1;Tb927.3.3450:mRNA-p1;Tb927.9.13650:mRNA-p1;Tb927.9.13655:mRNA-p1;Tb927.9.13680:mRNA-p1;Tb927.9.13710:mRNA-p1;Tb927.9.13740:mRNA-p1;Tb927.8.5060:mRNA-p1;Tb927.9.7650:mRNA-p1;Tb927.9.7230:mRNA-p1;Tb927.5.4500:mRNA-p1;Tb05.5K5.150:mRNA-p1	ADP-ribosylation factor family/50S ribosome-binding GTPase/Signal recognition particle receptor beta subunit/Ras of Complex, Roc, domain of DAPkinase/Ras family, putative	10	10	10	41.9	30.327	270	29.0162	29.2183	28.836	28.7604	29.0986	29.2878	28.8913	28.7139	29.2374	29.1007	28.9496	29.0778	28.9842	29.3239	29.103	29.1737	29.2603	29.2562	29.0923	29.1858	29.161	29.2971	29.0192	29.4311	29.0162	29.2183	28.836	28.7604	29.0986	29.2878	28.8913	28.7139	29.2374	29.1007	28.9496	29.0778
Tb427_080051100	Tb427_080051100.1	http://tritrypdb.org/tritrypdb/processQuestion.do?questionFullName=GeneQuestions.GeneByLocusTag&questionSubmit=Get+Answer&ds_gene_ids_data=Tb427_080051100.1	Tb427_080051100	Tb427_080051100	Tb927.8.4610:mRNA-p1	Tb927.8.4610:mRNA-p1;Tb927.11.15240:mRNA-p1;Tb927.8.4620:mRNA-p1;Tb927.8.890:mRNA-p1;Tb927.8.4330:mRNA-p1;Tb927.11.13750:mRNA-p1;Tb927.2.2130:mRNA-p1;Tb927.9.11000:mRNA-p1;Tb927.11.4570:mRNA-p1;Tb927.8.4770:mRNA-p1;Tb927.10.12960:mRNA-p1;Tb927.10.1520:mRNA-p1;Tb927.3.1120:mRNA-p1;Tb927.10.8560:mRNA-p1;Tb927.9.15930:mRNA-p1;Tb09.v4.0017:mRNA-p1;Tb927.11.12950:mRNA-p1;Tb927.11.15030:mRNA-p1;Tb927.8…	ADP-ribosylation factor family/Gtr1/RagA G protein conserved region/50S ribosome-binding GTPase/Ras of Complex, Roc, domain of DAPkinase/Ras family, putative	18	18	17	83	24.018	218	30.0611	30.5377	30.4764	30.5705	30.8692	30.7509	30.8644	30.7011	31.0113	30.888	31.0305	30.7888	31.0758	30.9372	31.1628	31.3858	31.3206	31.0087	30.9471	31.3989	31.3421	31.3107	31.2663	31.2897	30.0611	30.5377	30.4764	30.5705	30.8692	30.7509	30.8644	30.7011	31.0113	30.888	31.0305	30.7888
Tb427_110188100	Tb427_110188100.1	http://tritrypdb.org/tritrypdb/processQuestion.do?questionFullName=GeneQuestions.GeneByLocusTag&questionSubmit=Get+Answer&ds_gene_ids_data=Tb427_110188100.1	Tb427_110188100	Tb427_110188100	Tb927.11.16830:mRNA-p1	Tb927.11.16830:mRNA-p1	ADP-ribosylation factor family/Ras of Complex, Roc, domain of DAPkinase, putative	13	13	13	68.9	24.466	219	29.8405	29.3963	29.6496	29.3884	29.7548	29.511	29.8297	29.641	30.2272	29.7485	29.6785	29.7127	30.2429	30.1705	29.971	29.8786	30.4521	30.0572	29.7683	30.0103	29.8981	29.7417	29.8732	30.0003	29.8405	29.3963	29.6496	29.3884	29.7548	29.511	29.8297	29.641	30.2272	29.7485	29.6785	29.7127
Tb427_110155200	Tb427_110155200.1	http://tritrypdb.org/tritrypdb/processQuestion.do?questionFullName=GeneQuestions.GeneByLocusTag&questionSubmit=Get+Answer&ds_gene_ids_data=Tb427_110155200.1	Tb427_110155200	Tb427_110155200	Tb927.11.13750:mRNA-p1	Tb927.11.13750:mRNA-p1;Tb927.11.15240:mRNA-p1;Tb927.8.890:mRNA-p1;Tb927.8.4330:mRNA-p1;Tb927.2.2130:mRNA-p1;Tb927.8.4610:mRNA-p1;Tb927.9.11000:mRNA-p1;Tb927.11.4570:mRNA-p1;Tb927.10.12960:mRNA-p1;Tb927.10.1520:mRNA-p1;Tb927.8.4770:mRNA-p1;Tb927.8.4620:mRNA-p1;Tb927.10.8560:mRNA-p1;Tb927.6.3040:mRNA-p1;Tb927.9.15930:mRNA-p1;Tb09.v4.0017:mRNA-p1;Tb927.3.1120:mRNA-p1;Tb927.11.12950:mRNA-p1;Tb927.11.…	ADP-ribosylation factor family/Ras of Complex, Roc, domain of DAPkinase/Gtr1/RagA G protein conserved region/Ras family/50S ribosome-binding GTPase, putative	10	9	9	64.6	22.057	198	28.5099	28.5957	28.2414	27.7327	28.1861	28.3347	28.1971	28.4353	28.0707	28.0845	28.2792	28.0857	28.4129	28.4217	28.3123	28.3442	28.4359	28.3501	28.2685	28.1074	28.3521	28.5473	28.0611	28.333	28.5099	28.5957	28.2414	27.7327	28.1861	28.3347	28.1971	28.4353	28.0707	28.0845	28.2792	28.0857
Tb427_080009100	Tb427_080009100.1	http://tritrypdb.org/tritrypdb/processQuestion.do?questionFullName=GeneQuestions.GeneByLocusTag&questionSubmit=Get+Answer&ds_gene_ids_data=Tb427_080009100.1	Tb427_080009100	Tb427_080009100	Tb927.8.890:mRNA-p1	Tb927.8.890:mRNA-p1;Tb927.8.4330:mRNA-p1;Tb927.11.15240:mRNA-p1;Tb927.11.13750:mRNA-p1;Tb927.9.15930:mRNA-p1;Tb927.8.4610:mRNA-p1;Tb09.v4.0017:mRNA-p1;Tb927.9.11000:mRNA-p1;Tb927.2.2130:mRNA-p1;Tb927.8.4770:mRNA-p1;Tb927.11.4570:mRNA-p1;Tb927.10.12960:mRNA-p1;Tb927.10.1520:mRNA-p1;Tb927.8.4620:mRNA-p1;Tb927.11.12950:mRNA-p1;Tb927.11.6030:mRNA-p1;Tb927.3.1120:mRNA-p1;Tb927.6.3040:mRNA-p1;Tb927.11.…	ADP-ribosylation factor family/Ras of Complex, Roc, domain of DAPkinase/Gtr1/RagA G protein conserved region/Ras family/Signal recognition particle receptor beta subunit, putative	17	16	16	72.6	22.714	208	32.0802	31.9365	31.9214	31.8019	32.2072	31.9909	32.0998	32.272	32.3335	32.1833	32.4214	32.2803	32.2498	32.4378	32.3487	32.4478	32.4714	32.2481	32.4559	32.5365	32.3456	32.2443	32.5012	32.5568	32.0802	31.9365	31.9214	31.8019	32.2072	31.9909	32.0998	32.272	32.3335	32.1833	32.4214	32.2803
Tb427_080051200	Tb427_080051200.1	http://tritrypdb.org/tritrypdb/processQuestion.do?questionFullName=GeneQuestions.GeneByLocusTag&questionSubmit=Get+Answer&ds_gene_ids_data=Tb427_080051200.1	Tb427_080051200	Tb427_080051200	Tb927.8.4620:mRNA-p1	Tb927.8.4620:mRNA-p1;Tb927.8.4610:mRNA-p1;Tb927.8.4330:mRNA-p1;Tb927.8.890:mRNA-p1;Tb927.11.15240:mRNA-p1;Tb927.9.11000:mRNA-p1;Tb927.11.13750:mRNA-p1;Tb927.10.1520:mRNA-p1;Tb927.8.8140:mRNA-p1;Tb927.10.12960:mRNA-p1;Tb927.2.2130:mRNA-p1;Tb927.11.4570:mRNA-p1;Tb927.8.4770:mRNA-p1;Tb927.9.15930:mRNA-p1;Tb927.3.1120:mRNA-p1;Tb09.v4.0017:mRNA-p1;Tb927.11.12950:mRNA-p1;Tb927.11.15030:mRNA-p1;Tb927.6.…	ADP-ribosylation factor family/Ras of Complex, Roc, domain of DAPkinase/Ras family, putative	10	10	10	47.5	24.741	219	27.0966	27.4385	27.5846	26.798	27.3685	27.6118	27.791	27.8303	27.5267	28.1071	27.6247	28.0025	27.4796	28.2584	27.6255	27.6377	27.32	28.2827	27.6707	27.5489	28.0497	28.0761	28.0235	28.1347	27.0966	27.4385	27.5846	26.798	27.3685	27.6118	27.791	27.8303	27.5267	28.1071	27.6247	28.0025
Tb427_030059000	Tb427_030059000.1	http://tritrypdb.org/tritrypdb/processQuestion.do?questionFullName=GeneQuestions.GeneByLocusTag&questionSubmit=Get+Answer&ds_gene_ids_data=Tb427_030059000.1	Tb427_030059000	Tb427_030059000	Tb927.3.5550:mRNA-p1	Tb927.3.5550:mRNA-p1;Tb927.2.2130:mRNA-p1;Tb927.11.4570:mRNA-p1;Tb927.9.11000:mRNA-p1;Tb927.11.13750:mRNA-p1;Tb927.11.15240:mRNA-p1;Tb927.8.4330:mRNA-p1;Tb927.8.890:mRNA-p1;Tb927.6.3040:mRNA-p1;Tb927.8.4770:mRNA-p1;Tb927.10.1520:mRNA-p1;Tb927.10.12960:mRNA-p1;Tb927.11.15030:mRNA-p1;Tb927.11.12950:mRNA-p1	ADP-ribosylation factor family/Ras of Complex, Roc, domain of DAPkinase/Ras family, putative	10	10	10	55.7	20.638	183	30.2012	30.0036	29.9091	29.9131	30.1664	30.166	30.4037	30.2756	30.325	30.1612	30.0956	30.1663	30.5052	30.5972	30.3871	30.2589	30.336	30.3347	30.3311	30.4812	30.3629	29.9632	30.1411	30.3594	30.2012	30.0036	29.9091	29.9131	30.1664	30.166	30.4037	30.2756	30.325	30.1612	30.0956	30.1663
Tb427_100136800	Tb427_100136800.1	http://tritrypdb.org/tritrypdb/processQuestion.do?questionFullName=GeneQuestions.GeneByLocusTag&questionSubmit=Get+Answer&ds_gene_ids_data=Tb427_100136800.1	Tb427_100136800	Tb427_100136800	Tb927.10.12960:mRNA-p1	Tb927.10.12960:mRNA-p1;Tb927.11.4570:mRNA-p1;Tb927.11.15240:mRNA-p1;Tb927.10.1520:mRNA-p1;Tb927.8.4330:mRNA-p1;Tb927.2.2130:mRNA-p1;Tb927.11.13750:mRNA-p1;Tb927.8.890:mRNA-p1;Tb927.9.11000:mRNA-p1;Tb927.8.4610:mRNA-p1;Tb927.8.4770:mRNA-p1;Tb927.8.4620:mRNA-p1;Tb927.10.8560:mRNA-p1;Tb927.6.3040:mRNA-p1;Tb927.9.15930:mRNA-p1;Tb09.v4.0017:mRNA-p1;Tb927.11.12950:mRNA-p1;Tb927.11.15030:mRNA-p1;Tb927.3…	ADP-ribosylation factor family/Ras of Complex, Roc, domain of DAPkinase/Ras family, putative	13	13	13	67.4	24.484	230	29.8696	30.3198	29.9012	30.1377	30.0702	30.1325	30.0687	30.2266	30.2427	30.0674	29.9839	30.19	30.4577	30.4991	30.3896	30.1158	30.6068	30.3407	30.535	30.3593	30.5924	30.5955	30.4096	31.0485	29.8696	30.3198	29.9012	30.1377	30.0702	30.1325	30.0687	30.2266	30.2427	30.0674	29.9839	30.19
Tb427_030010900	Tb427_030010900.1	http://tritrypdb.org/tritrypdb/processQuestion.do?questionFullName=GeneQuestions.GeneByLocusTag&questionSubmit=Get+Answer&ds_gene_ids_data=Tb427_030010900.1	Tb427_030010900	Tb427_030010900	Tb927.3.1120:mRNA-p1	Tb927.3.1120:mRNA-p1;Tb927.8.890:mRNA-p1;Tb927.8.4330:mRNA-p1;Tb927.8.4610:mRNA-p1;Tb927.10.8560:mRNA-p1;Tb927.2.2130:mRNA-p1;Tb927.11.13750:mRNA-p1;Tb927.9.11000:mRNA-p1;Tb927.11.15030:mRNA-p1;Tb927.10.1520:mRNA-p1;Tb927.11.15240:mRNA-p1;Tb927.8.8140:mRNA-p1;Tb927.8.4620:mRNA-p1;Tb927.11.4570:mRNA-p1;Tb927.6.3040:mRNA-p1;Tb927.10.12960:mRNA-p1;Tb927.9.15930:mRNA-p1;Tb09.v4.0017:mRNA-p1;Tb927.11.…	ADP-ribosylation factor family/Ras of Complex, Roc, domain of DAPkinase/Ras family, putative	21	21	21	78.8	24.406	217	33.9202	34.0708	33.7855	33.6405	33.7673	34.0406	33.8392	33.6914	33.8626	34.0123	33.8755	33.7741	33.8182	33.9248	33.7057	33.9551	33.9533	33.782	33.7832	33.931	33.7869	34.0358	33.8405	34.0473	33.9202	34.0708	33.7855	33.6405	33.7673	34.0406	33.8392	33.6914	33.8626	34.0123	33.8755	33.7741
Tb427_110146200	Tb427_110146200.1	http://tritrypdb.org/tritrypdb/processQuestion.do?questionFullName=GeneQuestions.GeneByLocusTag&questionSubmit=Get+Answer&ds_gene_ids_data=Tb427_110146200.1	Tb427_110146200	Tb427_110146200	Tb927.11.12950:mRNA-p1	Tb927.11.12950:mRNA-p1;Tb927.8.4770:mRNA-p1;Tb927.11.15240:mRNA-p1;Tb927.8.890:mRNA-p1;Tb927.9.11000:mRNA-p1;Tb927.10.1520:mRNA-p1;Tb927.8.4610:mRNA-p1;Tb927.11.6030:mRNA-p1;Tb927.2.2130:mRNA-p1;Tb927.8.4330:mRNA-p1;Tb927.11.13750:mRNA-p1;Tb927.8.4620:mRNA-p1;Tb927.10.12960:mRNA-p1;Tb927.11.4570:mRNA-p1;Tb927.10.8560:mRNA-p1;Tb927.6.3040:mRNA-p1;Tb09.v4.0017:mRNA-p1;Tb927.9.15930:mRNA-p1;Tb927.10…	ADP-ribosylation factor family/Ras of Complex, Roc, domain of DAPkinase/Ras family, putative	3	3	3	15.3	23.714	216	26.2823	25.4956	25.063		25.3376	25.766	25.46		24.959	25.2766	25.3287	25.5547		25.6347	25.4082	25.6041	25.1893	25.2395			25.4328	25.4532			26.2823	25.4956	25.063	24.9157	25.3376	25.766	25.46	24.9998	24.959	25.2766	25.3287	25.5547
Tb427_060035500	Tb427_060035500.1	http://tritrypdb.org/tritrypdb/processQuestion.do?questionFullName=GeneQuestions.GeneByLocusTag&questionSubmit=Get+Answer&ds_gene_ids_data=Tb427_060035500.1	Tb427_060035500	Tb427_060035500	Tb927.6.3040:mRNA-p1	Tb927.6.3040:mRNA-p1;Tb927.2.2130:mRNA-p1;Tb927.11.13750:mRNA-p1;Tb927.8.890:mRNA-p1;Tb927.10.8560:mRNA-p1;Tb927.9.11000:mRNA-p1;Tb927.8.4330:mRNA-p1;Tb927.8.8140:mRNA-p1;Tb927.10.12960:mRNA-p1;Tb927.11.15240:mRNA-p1;Tb927.8.4610:mRNA-p1;Tb927.3.1120:mRNA-p1;Tb927.8.4770:mRNA-p1;Tb927.11.4570:mRNA-p1;Tb927.11.15030:mRNA-p1;Tb927.8.4620:mRNA-p1;Tb927.10.1520:mRNA-p1;Tb927.11.6030:mRNA-p1;Tb927.9.1…	ADP-ribosylation factor family/Ras of Complex, Roc, domain of DAPkinase/Ras family, putative	9	9	9	48.3	26.045	240	28.6394	28.1796	28.1553	27.9691	28.4499	27.8495	28.1551	27.9415	28.1362	27.8574	28.0178	27.7158	28.3253	27.9072	27.9159	27.9072	28.3379	27.9429	27.9973	28.0531	28.0035	27.809	27.9591	28.1319	28.6394	28.1796	28.1553	27.9691	28.4499	27.8495	28.1551	27.9415	28.1362	27.8574	28.0178	27.7158
Tb427_020007900	Tb427_020007900.1	http://tritrypdb.org/tritrypdb/processQuestion.do?questionFullName=GeneQuestions.GeneByLocusTag&questionSubmit=Get+Answer&ds_gene_ids_data=Tb427_020007900.1	Tb427_020007900	Tb427_020007900	Tb927.2.2130:mRNA-p1	Tb927.2.2130:mRNA-p1;Tb927.11.13750:mRNA-p1;Tb927.8.4330:mRNA-p1;Tb927.11.15240:mRNA-p1;Tb927.8.890:mRNA-p1;Tb927.10.1520:mRNA-p1;Tb927.10.12960:mRNA-p1;Tb927.11.4570:mRNA-p1;Tb927.8.4610:mRNA-p1;Tb927.9.11000:mRNA-p1;Tb927.8.4770:mRNA-p1;Tb927.6.3040:mRNA-p1;Tb927.10.8560:mRNA-p1;Tb927.9.15930:mRNA-p1;Tb927.3.1120:mRNA-p1;Tb09.v4.0017:mRNA-p1;Tb927.11.6030:mRNA-p1;Tb927.3.5550:mRNA-p1;Tb927.8.46…	ADP-ribosylation factor family/Ras of Complex, Roc, domain of DAPkinase/Ras family, putative	15	15	15	61.3	25.385	230	29.1723	29.4724	29.1331	29.2876	28.6881	28.4119	28.6736	28.8627	28.3864	28.4264	28.7792	28.265	28.7589	28.3554	28.8127	28.4919	28.9013	28.6948	28.767	28.6392	28.8221	28.8072	28.5485	29.0102	29.1723	29.4724	29.1331	29.2876	28.6881	28.4119	28.6736	28.8627	28.3864	28.4264	28.7792	28.265
Tb427_110170900	Tb427_110170900.1	http://tritrypdb.org/tritrypdb/processQuestion.do?questionFullName=GeneQuestions.GeneByLocusTag&questionSubmit=Get+Answer&ds_gene_ids_data=Tb427_110170900.1	Tb427_110170900	Tb427_110170900	Tb927.11.15240:mRNA-p1	Tb927.11.15240:mRNA-p1;Tb927.11.13750:mRNA-p1;Tb927.8.890:mRNA-p1;Tb927.8.4330:mRNA-p1;Tb927.8.4610:mRNA-p1;Tb927.10.12960:mRNA-p1;Tb927.2.2130:mRNA-p1;Tb927.9.11000:mRNA-p1;Tb927.11.4570:mRNA-p1;Tb927.10.1520:mRNA-p1;Tb927.8.4770:mRNA-p1;Tb927.8.4620:mRNA-p1;Tb927.9.15930:mRNA-p1;Tb927.11.12950:mRNA-p1;Tb09.v4.0017:mRNA-p1;Tb927.10.8560:mRNA-p1;Tb927.11.15030:mRNA-p1;Tb927.3.1120:mRNA-p1;Tb927.6…	ADP-ribosylation factor family/Ras of Complex, Roc, domain of DAPkinase/Ras family/Gtr1/RagA G protein conserved region containing protein, putative	15	15	15	74.1	23.481	212	29.7129	29.7475	29.5289	29.4712	29.881	29.764	29.7162	29.6595	29.7919	29.8407	29.6869	29.849	30.0602	30.0234	29.6541	29.7002	29.9445	30.0268	29.7359	30.0316	29.9734	29.8414	29.7028	30.0987	29.7129	29.7475	29.5289	29.4712	29.881	29.764	29.7162	29.6595	29.7919	29.8407	29.6869	29.849
Tb427_030037300	Tb427_030037300.1	http://tritrypdb.org/tritrypdb/processQuestion.do?questionFullName=GeneQuestions.GeneByLocusTag&questionSubmit=Get+Answer&ds_gene_ids_data=Tb427_030037300.1	Tb427_030037300	Tb427_030037300	Tb927.3.3450:mRNA-p1	Tb927.3.3450:mRNA-p1;Tb927.10.8580:mRNA-p1;Tb927.6.3650:mRNA-p1;Tb927.10.4250:mRNA-p1;Tb927.9.13655:mRNA-p1;Tb927.9.13680:mRNA-p1;Tb927.9.13710:mRNA-p1;Tb927.9.13740:mRNA-p1;Tb927.9.13650:mRNA-p1;Tb927.7.6230:mRNA-p1;Tb927.9.7650:mRNA-p1;Tb927.9.7230:mRNA-p1;Tb927.5.4500:mRNA-p1;Tb05.5K5.150:mRNA-p1;Tb927.8.5060:mRNA-p1;Tb927.10.5230:mRNA-p1;Tb11.v5.0234.1-p1;Tb927.10.1520:mRNA-p1;Tb927.10.9670:m…	ADP-ribosylation factor family/Signal recognition particle receptor beta subunit/50S ribosome-binding GTPase/Ras of Complex, Roc, domain of DAPkinase/Gtr1/RagA G protein conserved region/Ras family, putative	14	14	14	87.6	19.881	178	32.7143	32.5701	32.6626	32.2439	33.1021	32.5098	32.8317	32.9651	33.1797	32.957	33.1309	32.8197	33.2415	33.0455	33.0516	33.1047	33.132	32.7638	32.791	33.0259	32.8833	32.45	32.8288	33.117	32.7143	32.5701	32.6626	32.2439	33.1021	32.5098	32.8317	32.9651	33.1797	32.957	33.1309	32.8197
Tb427_090082200	Tb427_090082200.1;Tb427_090082100.1;Tb427_090082000.1;Tb427_090081900.1;Tb427_090081800.1	http://tritrypdb.org/tritrypdb/processQuestion.do?questionFullName=GeneQuestions.GeneByLocusTag&questionSubmit=Get+Answer&ds_gene_ids_data=Tb427_090082200.1,Tb427_090082100.1,Tb427_090082000.1,Tb427_090081900.1,Tb427_090081800.1	Tb427_090082200;Tb427_090082100;Tb427_090082000;Tb427_090081900;Tb427_090081800	Tb427_090082200	Tb927.9.13655:mRNA-p1;Tb927.9.13650:mRNA-p1	Tb927.9.13655:mRNA-p1;Tb927.9.13680:mRNA-p1;Tb927.9.13710:mRNA-p1;Tb927.9.13740:mRNA-p1;Tb927.9.13650:mRNA-p1;Tb927.9.7650:mRNA-p1;Tb927.7.6230:mRNA-p1;Tb927.10.8580:mRNA-p1;Tb927.3.3450:mRNA-p1;Tb927.9.7230:mRNA-p1;Tb927.10.4250:mRNA-p1;Tb927.6.3650:mRNA-p1;Tb927.8.5060:mRNA-p1;Tb927.5.4500:mRNA-p1;Tb05.5K5.150:mRNA-p1;Tb927.10.5230:mRNA-p1;Tb11.v5.0234.1-p1;Tb927.8.890:mRNA-p1;Tb927.10.9670:mRN…	ADP-ribosylation factor family/Signal recognition particle receptor beta subunit/50S ribosome-binding GTPase/Ras of Complex, Roc, domain of DAPkinase/Gtr1/RagA G protein conserved region/Ras family, putative	14	14	14	84.6	20.624	182	32.9495	32.9502	32.6045	32.8221	33.2126	33.0403	32.8756	33.1704	33.3081	33.1933	32.9804	33.2348	33.2774	33.2536	32.8722	33.1742	33.2423	33.066	33.0237	33.2049	32.9609	32.7703	32.9096	33.1464	32.9495	32.9502	32.6045	32.8221	33.2126	33.0403	32.8756	33.1704	33.3081	33.1933	32.9804	33.2348
Tb427_090043200	Tb427_090043200.1	http://tritrypdb.org/tritrypdb/processQuestion.do?questionFullName=GeneQuestions.GeneByLocusTag&questionSubmit=Get+Answer&ds_gene_ids_data=Tb427_090043200.1	Tb427_090043200	Tb427_090043200	Tb927.9.7650:mRNA-p1	Tb927.9.7650:mRNA-p1;Tb927.9.13650:mRNA-p1;Tb927.9.13655:mRNA-p1;Tb927.9.13680:mRNA-p1;Tb927.9.13710:mRNA-p1;Tb927.9.13740:mRNA-p1;Tb927.10.8580:mRNA-p1;Tb927.7.6230:mRNA-p1;Tb927.10.4250:mRNA-p1;Tb927.3.3450:mRNA-p1;Tb927.9.7230:mRNA-p1;Tb927.6.3650:mRNA-p1;Tb927.8.5060:mRNA-p1;Tb927.5.4500:mRNA-p1;Tb05.5K5.150:mRNA-p1;Tb927.10.5230:mRNA-p1;Tb927.8.4770:mRNA-p1;Tb927.8.4330:mRNA-p1;Tb927.8.890:m…	ADP-ribosylation factor family/Signal recognition particle receptor beta subunit/50S ribosome-binding GTPase/Ras of Complex, Roc, domain of DAPkinase/Gtr1/RagA G protein conserved region/Ras family, putative	4	4	4	33.3	21.294	189	27.8801	27.7843	27.5715	27.5156	28.4615	27.741	27.8222	27.6873	28.548	28.3729	27.7849	27.9592	28.391	28.4447	27.9352	28.0471	28.0921	28.1501	27.8915	28.1453	28.2172	27.9589	27.8226	28.1681	27.8801	27.7843	27.5715	27.5156	28.4615	27.741	27.8222	27.6873	28.548	28.3729	27.7849	27.9592
Tb427_060041400	Tb427_060041400.1	http://tritrypdb.org/tritrypdb/processQuestion.do?questionFullName=GeneQuestions.GeneByLocusTag&questionSubmit=Get+Answer&ds_gene_ids_data=Tb427_060041400.1	Tb427_060041400	Tb427_060041400	Tb927.6.3650:mRNA-p1	Tb927.6.3650:mRNA-p1;Tb927.3.3450:mRNA-p1;Tb927.10.8580:mRNA-p1;Tb927.9.13655:mRNA-p1;Tb927.9.13680:mRNA-p1;Tb927.9.13710:mRNA-p1;Tb927.9.13740:mRNA-p1;Tb927.9.13650:mRNA-p1;Tb927.7.6230:mRNA-p1;Tb927.9.7650:mRNA-p1;Tb927.10.4250:mRNA-p1;Tb927.9.7230:mRNA-p1;Tb927.8.5060:mRNA-p1;Tb927.10.5230:mRNA-p1;Tb927.5.4500:mRNA-p1;Tb05.5K5.150:mRNA-p1;Tb11.v5.0234.1-p1	ADP-ribosylation factor family/Signal recognition particle receptor beta subunit/50S ribosome-binding GTPase/Ras of Complex, Roc, domain of DAPkinase/Gtr1/RagA G protein conserved region/Ras family, putative	11	11	11	60.7	20.102	183	32.2166	32.294	32.0941	32.2581	31.966	32.1189	32.0955	32.0524	31.9604	32.1825	31.973	32.0006	31.8501	32.0027	31.7958	31.9787	31.7471	31.5292	31.7429	32.0991	31.9397	31.7072	31.9479	32.0198	32.2166	32.294	32.0941	32.2581	31.966	32.1189	32.0955	32.0524	31.9604	32.1825	31.973	32.0006
Tb427_100092500	Tb427_100092500.1	http://tritrypdb.org/tritrypdb/processQuestion.do?questionFullName=GeneQuestions.GeneByLocusTag&questionSubmit=Get+Answer&ds_gene_ids_data=Tb427_100092500.1	Tb427_100092500	Tb427_100092500	Tb927.10.8580:mRNA-p1	Tb927.10.8580:mRNA-p1;Tb927.3.3450:mRNA-p1;Tb927.9.13655:mRNA-p1;Tb927.9.13680:mRNA-p1;Tb927.9.13710:mRNA-p1;Tb927.9.13740:mRNA-p1;Tb927.9.13650:mRNA-p1;Tb927.10.4250:mRNA-p1;Tb927.7.6230:mRNA-p1;Tb927.9.7650:mRNA-p1;Tb927.6.3650:mRNA-p1;Tb927.9.7230:mRNA-p1;Tb927.5.4500:mRNA-p1;Tb05.5K5.150:mRNA-p1;Tb927.8.5060:mRNA-p1;Tb927.10.5230:mRNA-p1;Tb11.v5.0234.1-p1;Tb927.10.9670:mRNA-p1;Tb927.10.1520:m…	ADP-ribosylation factor family/Signal recognition particle receptor beta subunit/50S ribosome-binding GTPase/Ras of Complex, Roc, domain of DAPkinase/Gtr1/RagA G protein conserved region/Ras family, putative	4	3	3	21.6	21.902	190	26.6377	26.4076	25.9361	26.7376	26.4642	26.3962	26.0124	26.2101	26.664	26.3071	26.0672	26.2016	26.3882	26.1578	26.1963	26.1828	25.8054	26.1135	26.0602	25.8453	25.4048	25.8123	26.3734	25.5339	26.6377	26.4076	25.9361	26.7376	26.4642	26.3962	26.0124	26.2101	26.664	26.3071	26.0672	26.2016
Tb427_100046800	Tb427_100046800.1	http://tritrypdb.org/tritrypdb/processQuestion.do?questionFullName=GeneQuestions.GeneByLocusTag&questionSubmit=Get+Answer&ds_gene_ids_data=Tb427_100046800.1	Tb427_100046800	Tb427_100046800	Tb927.10.4250:mRNA-p1	Tb927.10.4250:mRNA-p1;Tb927.3.3450:mRNA-p1;Tb927.10.8580:mRNA-p1;Tb927.9.13655:mRNA-p1;Tb927.9.13680:mRNA-p1;Tb927.9.13710:mRNA-p1;Tb927.9.13740:mRNA-p1;Tb927.9.13650:mRNA-p1;Tb927.7.6230:mRNA-p1;Tb927.9.7650:mRNA-p1;Tb927.9.7230:mRNA-p1;Tb927.6.3650:mRNA-p1;Tb927.5.4500:mRNA-p1;Tb05.5K5.150:mRNA-p1;Tb927.8.5060:mRNA-p1;Tb927.10.5230:mRNA-p1;Tb927.10.1520:mRNA-p1;Tb11.v5.0234.1-p1;Tb927.11.13750:…	ADP-ribosylation factor family/Signal recognition particle receptor beta subunit/50S ribosome-binding GTPase/Ras of Complex, Roc, domain of DAPkinase/Gtr1/RagA G protein conserved region/Ras family, putative	7	7	6	41.4	20.796	186	28.085	28.0727	27.8221	28.2157	27.7988	27.7946	27.8111	28.0327	27.6155	27.7826	27.9048	28.042	27.8024	27.8863	27.8021	28.0943	27.5048	27.182	27.6518	27.552	27.3059	27.1538	27.5936	27.3897	28.085	28.0727	27.8221	28.2157	27.7988	27.7946	27.8111	28.0327	27.6155	27.7826	27.9048	28.042
Tb427_050052400	Tb427_050052400.1	http://tritrypdb.org/tritrypdb/processQuestion.do?questionFullName=GeneQuestions.GeneByLocusTag&questionSubmit=Get+Answer&ds_gene_ids_data=Tb427_050052400.1	Tb427_050052400	Tb427_050052400	Tb927.5.4500:mRNA-p1	Tb927.5.4500:mRNA-p1;Tb05.5K5.150:mRNA-p1;Tb927.10.8580:mRNA-p1;Tb927.3.3450:mRNA-p1;Tb927.9.13650:mRNA-p1;Tb927.9.13655:mRNA-p1;Tb927.9.13680:mRNA-p1;Tb927.9.13710:mRNA-p1;Tb927.9.13740:mRNA-p1;Tb927.7.6230:mRNA-p1;Tb927.9.7230:mRNA-p1;Tb927.10.4250:mRNA-p1;Tb927.9.7650:mRNA-p1;Tb927.8.5060:mRNA-p1;Tb927.6.3650:mRNA-p1;Tb927.9.2060:mRNA-p1;Tb927.10.5230:mRNA-p1;Tb11.v5.0234.1-p1	ADP-ribosylation factor family/Signal recognition particle receptor beta subunit/50S ribosome-binding GTPase/Ras of Complex, Roc, domain of DAPkinase/Ras family/Gtr1/RagA G protein conserved region containing protein, putative	13	13	13	73.2	21.771	194	32.0395	32.0213	31.5687	31.5199	31.6319	31.7869	31.6041	31.7177	31.8153	31.7893	31.6032	31.6564	31.7257	31.9149	31.5119	31.6803	31.5466	31.422	31.5336	31.8293	31.3159	31.5192	31.1429	31.8388	32.0395	32.0213	31.5687	31.5199	31.6319	31.7869	31.6041	31.7177	31.8153	31.7893	31.6032	31.6564
Tb427_020018800	Tb427_020018800.1	http://tritrypdb.org/tritrypdb/processQuestion.do?questionFullName=GeneQuestions.GeneByLocusTag&questionSubmit=Get+Answer&ds_gene_ids_data=Tb427_020018800.1	Tb427_020018800	Tb427_020018800	Tb927.2.4090:mRNA-p1	Tb927.2.4090:mRNA-p1;Tb927.11.190:mRNA-p1	ADP-ribosylation factor family/Signal recognition particle receptor beta subunit/Elongation factor Tu GTP binding domain/50S ribosome-binding GTPase, putative	9	9	9	50.4	29.335	270	27.9655	28.4106	28.2461	28.2503	28.1612	28.1123	28.2661	28.4467	28.3091	28.1892	28.1206	28.1501	28.2517	28.0425	28.2502	28.1474	28.4636	28.59	28.3027	28.171	28.6103	28.7586	28.058	28.8033	27.9655	28.4106	28.2461	28.2503	28.1612	28.1123	28.2661	28.4467	28.3091	28.1892	28.1206	28.1501
Tb427_080055900	Tb427_080055900.1	http://tritrypdb.org/tritrypdb/processQuestion.do?questionFullName=GeneQuestions.GeneByLocusTag&questionSubmit=Get+Answer&ds_gene_ids_data=Tb427_080055900.1	Tb427_080055900	Tb427_080055900	Tb927.8.5060:mRNA-p1	Tb927.8.5060:mRNA-p1;Tb927.7.6230:mRNA-p1;Tb927.9.13650:mRNA-p1;Tb927.9.13655:mRNA-p1;Tb927.9.13680:mRNA-p1;Tb927.9.13710:mRNA-p1;Tb927.9.13740:mRNA-p1;Tb927.3.3450:mRNA-p1;Tb927.6.3650:mRNA-p1;Tb927.10.8580:mRNA-p1;Tb927.9.7650:mRNA-p1;Tb927.9.7230:mRNA-p1;Tb927.10.4250:mRNA-p1;Tb927.5.4500:mRNA-p1;Tb05.5K5.150:mRNA-p1;Tb927.10.5230:mRNA-p1;Tb11.v5.0234.1-p1;Tb927.3.1120:mRNA-p1	ADP-ribosylation factor family/Signal recognition particle receptor beta subunit/Gtr1/RagA G protein conserved region/Ras of Complex, Roc, domain of DAPkinase/50S ribosome-binding GTPase/Ras family, putative	7	7	7	47.1	20.618	189	28.0278	27.7617	27.0544	27.7544	28.0216	27.7015	27.8083	27.6502	27.9694	28.1377	28.2907	28.0929	28.1642	28.3937	27.7054	28.365	28.217	28.0689	28.5051	28.5486	27.9492	28.4034	28.5184	28.0044	28.0278	27.7617	27.0544	27.7544	28.0216	27.7015	27.8083	27.6502	27.9694	28.1377	28.2907	28.0929
Tb427_070068000	Tb427_070068000.1	http://tritrypdb.org/tritrypdb/processQuestion.do?questionFullName=GeneQuestions.GeneByLocusTag&questionSubmit=Get+Answer&ds_gene_ids_data=Tb427_070068000.1	Tb427_070068000	Tb427_070068000	Tb927.7.6230:mRNA-p1	Tb927.7.6230:mRNA-p1;Tb927.9.13650:mRNA-p1;Tb927.9.13655:mRNA-p1;Tb927.9.13680:mRNA-p1;Tb927.9.13710:mRNA-p1;Tb927.9.13740:mRNA-p1;Tb927.9.7230:mRNA-p1;Tb927.10.8580:mRNA-p1;Tb927.9.7650:mRNA-p1;Tb927.3.3450:mRNA-p1;Tb927.10.4250:mRNA-p1;Tb927.6.3650:mRNA-p1;Tb927.8.5060:mRNA-p1;Tb927.5.4500:mRNA-p1;Tb05.5K5.150:mRNA-p1;Tb927.9.2060:mRNA-p1;Tb927.10.5230:mRNA-p1;Tb927.10.9670:mRNA-p1;Tb11.v5.0234…	ADP-ribosylation factor family/Signal recognition particle receptor beta subunit/Gtr1/RagA G protein conserved region/Ras of Complex, Roc, domain of DAPkinase/Ras family, putative	6	6	6	41.1	20.714	190	28.9264	28.3364	28.3569	28.2474	28.4127	28.181	28.2212	28.2651	28.6498	28.0048	27.7407	28.049	28.2957	28.4969	28.3387	28.1164	28.7216	28.2843	28.2336	28.5925	28.2923	28.4855	28.0265	28.7761	28.9264	28.3364	28.3569	28.2474	28.4127	28.181	28.2212	28.2651	28.6498	28.0048	27.7407	28.049
Tb427_090040700	Tb427_090040700.1	http://tritrypdb.org/tritrypdb/processQuestion.do?questionFullName=GeneQuestions.GeneByLocusTag&questionSubmit=Get+Answer&ds_gene_ids_data=Tb427_090040700.1	Tb427_090040700	Tb427_090040700	Tb927.9.7230:mRNA-p1	Tb927.9.7230:mRNA-p1;Tb927.7.6230:mRNA-p1;Tb927.9.13655:mRNA-p1;Tb927.9.13680:mRNA-p1;Tb927.9.13710:mRNA-p1;Tb927.9.13740:mRNA-p1;Tb927.9.13650:mRNA-p1;Tb927.10.8580:mRNA-p1;Tb927.9.7650:mRNA-p1;Tb927.3.3450:mRNA-p1;Tb927.10.4250:mRNA-p1;Tb927.6.3650:mRNA-p1;Tb927.5.4500:mRNA-p1;Tb05.5K5.150:mRNA-p1;Tb927.8.5060:mRNA-p1;Tb927.11.4570:mRNA-p1;Tb927.10.5230:mRNA-p1;Tb927.10.1520:mRNA-p1;Tb927.10.96…	ADP-ribosylation factor family/Signal recognition particle receptor beta subunit/Ras of Complex, Roc, domain of DAPkinase/Gtr1/RagA G protein conserved region/Ras family/50S ribosome-binding GTPase, putative	7	7	7	52.3	21.093	193	27.2692	27.1996	26.9572	27.3958	28.1199	27.9029	27.5815	27.7649	28.1782	27.8185	27.6207	27.447	27.7742	27.9075	28.0227	27.7678	28.0361	27.3397	27.5961	27.7988	27.4648	27.3336	27.2546	27.7079	27.2692	27.1996	26.9572	27.3958	28.1199	27.9029	27.5815	27.7649	28.1782	27.8185	27.6207	27.447
Tb427_110135300	Tb427_110135300.1	http://tritrypdb.org/tritrypdb/processQuestion.do?questionFullName=GeneQuestions.GeneByLocusTag&questionSubmit=Get+Answer&ds_gene_ids_data=Tb427_110135300.1	Tb427_110135300	Tb427_110135300	Tb927.11.11870:mRNA-p1	Tb927.11.11870:mRNA-p1	ADP-ribosylglycohydrolase, putative	7	7	7	22.1	38.201	349	27.0242	26.5997	26.0053	27.0768	26.6203	26.5712	26.5521	26.5231	27.0969	26.0809	26.3953	26.5633	26.6926	26.3981	26.1749	26.514	26.8192	25.9826	26.5013	26.5875	26.5097	25.8816	26.307	26.0935	27.0242	26.5997	26.0053	27.0768	26.6203	26.5712	26.5521	26.5231	27.0969	26.0809	26.3953	26.5633
Tb427_070076900	Tb427_070076900.1	http://tritrypdb.org/tritrypdb/processQuestion.do?questionFullName=GeneQuestions.GeneByLocusTag&questionSubmit=Get+Answer&ds_gene_ids_data=Tb427_070076900.1	Tb427_070076900	Tb427_070076900	Tb927.7.6930:mRNA-p1	Tb927.7.6930:mRNA-p1;Tb927.10.8070:mRNA-p1	AFG1-like ATPase, putative	27	27	27	59.2	55.919	490	30.1875	30.3498	30.2613	30.0215	30.705	30.4844	30.3972	30.6147	30.3671	30.6323	30.5056	30.5074	30.843	31.0443	30.8385	30.8019	30.9116	31.1697	31.1242	30.9642	31.1255	31.2069	31.2705	31.1663	30.1875	30.3498	30.2613	30.0215	30.705	30.4844	30.3972	30.6147	30.3671	30.6323	30.5056	30.5074
Tb427_100087500	Tb427_100087500.1	http://tritrypdb.org/tritrypdb/processQuestion.do?questionFullName=GeneQuestions.GeneByLocusTag&questionSubmit=Get+Answer&ds_gene_ids_data=Tb427_100087500.1	Tb427_100087500	Tb427_100087500	Tb927.10.8070:mRNA-p1	Tb927.10.8070:mRNA-p1;Tb927.7.6930:mRNA-p1	AFG1-like ATPase, putative	10	10	10	26	55.589	492	26.58	26.3662	26.4365		26.4507	25.9729	26.0329	24.4364	26.5319	25.9362	25.6406	25.9004	26.9832	26.607	26.1363	26.3695	27.1735	27.9688	27.2511	27.1787	27.253	27.8226	27.5196	28.154	26.58	26.3662	26.4365	25.2316	26.4507	25.9729	26.0329	24.4364	26.5319	25.9362	25.6406	25.9004
Tb427_080022800	Tb427_080022800.1	http://tritrypdb.org/tritrypdb/processQuestion.do?questionFullName=GeneQuestions.GeneByLocusTag&questionSubmit=Get+Answer&ds_gene_ids_data=Tb427_080022800.1	Tb427_080022800	Tb427_080022800	Tb927.8.1990:mRNA-p1	Tb927.8.1990:mRNA-p1;Tb927.9.5770:mRNA-p1;Tb927.9.5860:mRNA-p1	AhpC/TSA family/Redoxin/C-terminal domain of 1-Cys peroxiredoxin, putative	22	22	22	87.2	25.631	226	33.7362	33.9529	33.7429	33.6223	33.6767	33.8288	33.6344	33.546	34.0936	33.8179	33.8988	34.0781	33.8978	34.0628	33.8413	33.9738	34.2681	34.0584	34.288	34.4145	34.0017	34.082	34.2524	34.3904	33.7362	33.9529	33.7429	33.6223	33.6767	33.8288	33.6344	33.546	34.0936	33.8179	33.8988	34.0781
Tb427_090032000	Tb427_090032000.1;Tb427_090031800.1	http://tritrypdb.org/tritrypdb/processQuestion.do?questionFullName=GeneQuestions.GeneByLocusTag&questionSubmit=Get+Answer&ds_gene_ids_data=Tb427_090032000.1,Tb427_090031800.1	Tb427_090032000;Tb427_090031800	Tb427_090032000	Tb927.9.5770:mRNA-p1	Tb927.9.5770:mRNA-p1;Tb927.9.5860:mRNA-p1;Tb927.8.1990:mRNA-p1	AhpC/TSA family/Redoxin/C-terminal domain of 1-Cys peroxiredoxin, putative	22	22	22	79.4	22.424	199	34.9506	35.4085	35.2209	35.0964	35.0505	35.1191	35.285	34.8106	34.8193	35.089	34.9113	34.8831	35.0654	35.2243	35.0398	34.8786	34.8392	35.1299	34.7417	35.2879	35.1936	35.0636	34.7882	34.9725	34.9506	35.4085	35.2209	35.0964	35.0505	35.1191	35.285	34.8106	34.8193	35.089	34.9113	34.8831
Tb427_070050700	Tb427_070050700.1	http://tritrypdb.org/tritrypdb/processQuestion.do?questionFullName=GeneQuestions.GeneByLocusTag&questionSubmit=Get+Answer&ds_gene_ids_data=Tb427_070050700.1	Tb427_070050700	Tb427_070050700	Tb927.7.4520:mRNA-p1	Tb927.7.4520:mRNA-p1;Tb11.v5.0265.1-p1	AhpC/TSA family/Thioredoxin-like, putative	16	16	16	80.6	22.285	201	33.0293	32.9176	32.7078	32.6879	32.7272	32.7593	32.5048	32.7015	32.6472	32.3295	32.3577	32.3138	32.3943	32.366	32.2162	32.4676	32.3145	31.7873	31.8469	31.9873	31.8306	31.9332	31.8571	31.7998	33.0293	32.9176	32.7078	32.6879	32.7272	32.7593	32.5048	32.7015	32.6472	32.3295	32.3577	32.3138
Tb427_100101300	Tb427_100101300.1	http://tritrypdb.org/tritrypdb/processQuestion.do?questionFullName=GeneQuestions.GeneByLocusTag&questionSubmit=Get+Answer&ds_gene_ids_data=Tb427_100101300.1	Tb427_100101300	Tb427_100101300	Tb927.10.9410:mRNA-p1	Tb927.10.9410:mRNA-p1	AIR synthase related protein, N-terminal domain/AIR synthase related protein, C-terminal domain containing protein, putative	5	5	5	17.3	42.954	393	27.8019	27.4717	27.6333	27.3496	27.6343	27.4383	27.5825	27.4399	27.2722	27.5719	27.4404	27.2291	27.3785	27.3546	27.646	27.3951	27.3749	27.2953	27.2454	27.2744	27.0236	27.0586	27.1294	27.4673	27.8019	27.4717	27.6333	27.3496	27.6343	27.4383	27.5825	27.4399	27.2722	27.5719	27.4404	27.2291
Tb427_080041200	Tb427_080041200.1	http://tritrypdb.org/tritrypdb/processQuestion.do?questionFullName=GeneQuestions.GeneByLocusTag&questionSubmit=Get+Answer&ds_gene_ids_data=Tb427_080041200.1	Tb427_080041200	Tb427_080041200			AKAP7 2'5' RNA ligase-like domain containing protein, putative	7	7	7	16.6	48.945	446	26.0808	26.5152	26.1145	25.9828	26.0532	26.3075	26.3696	25.9173	26.0974	25.9762	26.2974	26.2405	26.0125	26.1533	25.9472	26.245	25.7261	26.1958	26.2534	25.9181	26.0155	26.3224	25.9898		26.0808	26.5152	26.1145	25.9828	26.0532	26.3075	26.3696	25.9173	26.0974	25.9762	26.2974	26.2405
Tb427_110156700	Tb427_110156700.1	http://tritrypdb.org/tritrypdb/processQuestion.do?questionFullName=GeneQuestions.GeneByLocusTag&questionSubmit=Get+Answer&ds_gene_ids_data=Tb427_110156700.1	Tb427_110156700	Tb427_110156700			AKAP7 2'5' RNA ligase-like domain/2'-5' RNA ligase superfamily, putative	8	8	8	33.6	30.693	268	26.7972	27.5743	27.4209	28.2001	27.7461	27.4728	27.5545	27.8584	27.4942	27.6033	27.8917	27.6302	27.9502	27.8108	28.3018	27.6306	28.3029	27.5667	27.8501	27.8675	27.6416	27.5636	27.6196	27.6976	26.7972	27.5743	27.4209	28.2001	27.7461	27.4728	27.5545	27.8584	27.4942	27.6033	27.8917	27.6302
Tb427_050017500	Tb427_050017500.1	http://tritrypdb.org/tritrypdb/processQuestion.do?questionFullName=GeneQuestions.GeneByLocusTag&questionSubmit=Get+Answer&ds_gene_ids_data=Tb427_050017500.1	Tb427_050017500	Tb427_050017500	Tb927.5.1280:mRNA-p1	Tb927.5.1280:mRNA-p1	Alanine racemase, N-terminal domain containing protein, putative	12	12	12	71.2	27.575	257	29.7201	29.4305	29.4426	29.5765	29.9847	29.6619	29.9915	29.8221	29.8169	29.9786	29.8482	29.8658	30.1	30.129	30.0078	29.9448	29.7923	29.9688	29.5646	30.1146	30.0267	29.543	29.8554	30.2902	29.7201	29.4305	29.4426	29.5765	29.9847	29.6619	29.9915	29.8221	29.8169	29.9786	29.8482	29.8658
Tb427_110049700	Tb427_110049700.1	http://tritrypdb.org/tritrypdb/processQuestion.do?questionFullName=GeneQuestions.GeneByLocusTag&questionSubmit=Get+Answer&ds_gene_ids_data=Tb427_110049700.1	Tb427_110049700	Tb427_110049700	Tb927.11.4460:mRNA-p1	Tb927.11.4460:mRNA-p1;Tb927.11.4450:mRNA-p1	Alba, putative	10	10	10	64.8	14.038	125	31.8889	31.402	31.6817	31.0973	32.3779	31.552	31.8309	32.1209	32.1792	32.1371	31.5505	31.7825	32.1614	32.1051	32.0232	31.9488	32.3555	31.6689	31.5383	31.7928	31.6514	31.2953	31.7967	32.0728	31.8889	31.402	31.6817	31.0973	32.3779	31.552	31.8309	32.1209	32.1792	32.1371	31.5505	31.7825
Tb427_040022600	Tb427_040022600.1	http://tritrypdb.org/tritrypdb/processQuestion.do?questionFullName=GeneQuestions.GeneByLocusTag&questionSubmit=Get+Answer&ds_gene_ids_data=Tb427_040022600.1	Tb427_040022600	Tb427_040022600	Tb927.4.2030:mRNA-p1	Tb927.4.2030:mRNA-p1;Tb927.4.2040:mRNA-p1	Alba, putative	12	2	2	59.4	22.704	217		23.2503	25.1259	23.9236	23.994	23.5391		25.5492	25.0662	24.0644	25.1593	25.5554	24.2811		24.0554	24.2224	25.2962	24.1506	24.7882		25.0462	23.8864	24.925	24.4698	24.8788	23.2503	25.1259	23.9236	23.994	23.5391	24.6928	25.5492	25.0662	24.0644	25.1593	25.5554
Tb427_040022700	Tb427_040022700.1	http://tritrypdb.org/tritrypdb/processQuestion.do?questionFullName=GeneQuestions.GeneByLocusTag&questionSubmit=Get+Answer&ds_gene_ids_data=Tb427_040022700.1	Tb427_040022700	Tb427_040022700	Tb927.4.2040:mRNA-p1	Tb927.4.2040:mRNA-p1;Tb927.4.2030:mRNA-p1	Alba, putative	17	17	7	74.7	20.808	190	33.6263	33.3823	33.4293	33.3141	33.4082	33.3109	33.5018	33.3513	33.37	33.3856	33.6141	33.4209	33.401	33.4141	33.3874	33.2958	33.5745	33.2976	33.2179	33.5753	33.2192	33.0772	33.3221	33.4344	33.6263	33.3823	33.4293	33.3141	33.4082	33.3109	33.5018	33.3513	33.37	33.3856	33.6141	33.4209
Tb427_110049600	Tb427_110049600.1	http://tritrypdb.org/tritrypdb/processQuestion.do?questionFullName=GeneQuestions.GeneByLocusTag&questionSubmit=Get+Answer&ds_gene_ids_data=Tb427_110049600.1	Tb427_110049600	Tb427_110049600	Tb927.11.4450:mRNA-p1	Tb927.11.4450:mRNA-p1;Tb927.11.4460:mRNA-p1	Alba, putative	13	13	13	70.9	12.773	117	32.9112	33.0667	33.059	33.0123	32.8055	33.1215	32.9311	32.816	32.9426	32.9361	33.0135	32.9872	32.6182	33.0299	33.0822	32.8593	32.9976	32.5714	32.6039	33.1233	32.8717	32.6717	32.5935	32.9323	32.9112	33.0667	33.059	33.0123	32.8055	33.1215	32.9311	32.816	32.9426	32.9361	33.0135	32.9872
Tb427_090040400	Tb427_090040400.1	http://tritrypdb.org/tritrypdb/processQuestion.do?questionFullName=GeneQuestions.GeneByLocusTag&questionSubmit=Get+Answer&ds_gene_ids_data=Tb427_090040400.1	Tb427_090040400	Tb427_090040400	Tb927.9.7190:mRNA-p1	Tb927.9.7190:mRNA-p1;Tb927.7.7410:mRNA-p1	Alcohol dehydrogenase GroES-like domain containing protein, putative	17	17	17	50.1	49.92	445	29.7945	29.8844	29.6775	29.5264	29.8878	30.0202	30.0868	29.8367	29.9477	29.8153	29.8455	29.8822	29.861	30.202	30.041	30.1604	29.5249	29.9225	30.0307	29.7468	29.5819	29.8738	30.0142	29.3159	29.7945	29.8844	29.6775	29.5264	29.8878	30.0202	30.0868	29.8367	29.9477	29.8153	29.8455	29.8822
Tb427_100102500	Tb427_100102500.1	http://tritrypdb.org/tritrypdb/processQuestion.do?questionFullName=GeneQuestions.GeneByLocusTag&questionSubmit=Get+Answer&ds_gene_ids_data=Tb427_100102500.1	Tb427_100102500	Tb427_100102500	Tb927.10.9560:mRNA-p1	Tb927.10.9560:mRNA-p1;Tb927.8.3970:mRNA-p1;Tb927.3.4990:mRNA-p1	Alcohol dehydrogenase GroES-like domain/Zinc-binding dehydrogenase, putative	7	7	7	30.8	36.083	334	27.4488	27.3787	26.8008	26.6029	27.0467	27.5464	27.6438	27.2302	27.1154	26.7807	27.1714	26.672	27.6779	27.6143	27.3698	26.5469	27.2446	27.1819	27.123	27.6711	27.1853	27.4174	27.1931	27.8011	27.4488	27.3787	26.8008	26.6029	27.0467	27.5464	27.6438	27.2302	27.1154	26.7807	27.1714	26.672
Tb427_030053300	Tb427_030053300.1	http://tritrypdb.org/tritrypdb/processQuestion.do?questionFullName=GeneQuestions.GeneByLocusTag&questionSubmit=Get+Answer&ds_gene_ids_data=Tb427_030053300.1	Tb427_030053300	Tb427_030053300	Tb927.3.4990:mRNA-p1	Tb927.3.4990:mRNA-p1;Tb927.8.3970:mRNA-p1;Tb927.7.7410:mRNA-p1;Tb927.10.9560:mRNA-p1	Alcohol dehydrogenase GroES-like domain/Zinc-binding dehydrogenase, putative	15	15	15	40.4	36.402	339	29.4618	29.1222	28.8387	28.9186	29.3028	28.9398	29.0961	28.9163	29.3456	29.0919	29.0981	29.4109	29.498	29.2452	29.331	29.6347	29.5968	28.9338	29.7003	29.4966	29.2649	28.8786	29.8838	29.5518	29.4618	29.1222	28.8387	28.9186	29.3028	28.9398	29.0961	28.9163	29.3456	29.0919	29.0981	29.4109
Tb427_060035600	Tb427_060035600.1	http://tritrypdb.org/tritrypdb/processQuestion.do?questionFullName=GeneQuestions.GeneByLocusTag&questionSubmit=Get+Answer&ds_gene_ids_data=Tb427_060035600.1	Tb427_060035600	Tb427_060035600	Tb927.6.3050:mRNA-p1	Tb927.6.3050:mRNA-p1;Tb927.6.4210:mRNA-p1;Tb927.10.6190:mRNA-p1;Tb927.10.3210:mRNA-p1	Aldehyde dehydrogenase family, putative	27	27	27	56.7	59.688	543	31.5033	31.4299	31.3853	31.4002	31.9465	31.8084	31.8216	31.8572	31.685	31.8149	31.7915	31.8532	31.9223	31.9918	31.8718	31.9767	31.7716	31.6369	31.6905	31.8536	31.5224	31.4284	31.6206	31.7652	31.5033	31.4299	31.3853	31.4002	31.9465	31.8084	31.8216	31.8572	31.685	31.8149	31.7915	31.8532
Tb427_100037100	Tb427_100037100.1	http://tritrypdb.org/tritrypdb/processQuestion.do?questionFullName=GeneQuestions.GeneByLocusTag&questionSubmit=Get+Answer&ds_gene_ids_data=Tb427_100037100.1	Tb427_100037100	Tb427_100037100	Tb927.10.3210:mRNA-p1	Tb927.10.3210:mRNA-p1;Tb927.10.6190:mRNA-p1;Tb927.6.4210:mRNA-p1;Tb927.6.3050:mRNA-p1	Aldehyde dehydrogenase family, putative	49	49	49	87.2	62.036	561	35.6947	35.6325	35.7243	35.404	36.0156	35.8454	35.8746	35.842	35.9572	36.1376	36.0826	36.0683	36.2176	36.2366	36.1123	36.2482	36.1227	36.484	36.1891	36.5045	36.3711	36.3762	36.318	36.5536	35.6947	35.6325	35.7243	35.404	36.0156	35.8454	35.8746	35.842	35.9572	36.1376	36.0826	36.0683
Tb427_060047000	Tb427_060047000.1	http://tritrypdb.org/tritrypdb/processQuestion.do?questionFullName=GeneQuestions.GeneByLocusTag&questionSubmit=Get+Answer&ds_gene_ids_data=Tb427_060047000.1	Tb427_060047000	Tb427_060047000	Tb927.6.4210:mRNA-p1	Tb927.6.4210:mRNA-p1;Tb927.10.6190:mRNA-p1;Tb927.6.3050:mRNA-p1;Tb927.10.3210:mRNA-p1	Aldehyde dehydrogenase family, putative	22	22	22	57.6	64.668	595	31.0558	31.1047	30.9629	30.7222	31.4714	30.8783	31.1059	30.9471	31.3431	31.0109	30.9724	30.8098	31.403	31.1284	31.1914	30.9436	31.5627	31.1649	31.1112	31.1202	31.1602	31.2673	31.2627	31.1208	31.0558	31.1047	30.9629	30.7222	31.4714	30.8783	31.1059	30.9471	31.3431	31.0109	30.9724	30.8098
Tb427_100066100	Tb427_100066100.1	http://tritrypdb.org/tritrypdb/processQuestion.do?questionFullName=GeneQuestions.GeneByLocusTag&questionSubmit=Get+Answer&ds_gene_ids_data=Tb427_100066100.1	Tb427_100066100	Tb427_100066100	Tb927.10.6190:mRNA-p1	Tb927.10.6190:mRNA-p1;Tb927.6.4210:mRNA-p1;Tb927.6.3050:mRNA-p1;Tb927.10.3210:mRNA-p1	Aldehyde dehydrogenase family, putative	20	20	20	50.7	54.09	503	31.0012	31.2042	30.77	30.8673	30.8651	31.079	30.9777	30.7121	31.0348	30.8515	31.0834	31.2076	30.9053	31.1564	31.1787	31.3772	31.2499	31.2091	31.5054	31.3775	31.3138	31.4629	31.4544	31.609	31.0012	31.2042	30.77	30.8673	30.8651	31.079	30.9777	30.7121	31.0348	30.8515	31.0834	31.2076
Tb427_080084000	Tb427_080084000.1	http://tritrypdb.org/tritrypdb/processQuestion.do?questionFullName=GeneQuestions.GeneByLocusTag&questionSubmit=Get+Answer&ds_gene_ids_data=Tb427_080084000.1	Tb427_080084000	Tb427_080084000	Tb927.8.7770:mRNA-p1	Tb927.8.7770:mRNA-p1	Aldehyde dehydrogenase family, putative	7	7	7	19.3	60.385	559	27.0224	27.4032	27.1842	26.8978	27.0171	26.655	27.2553	27.1249	27.2784	27.0361	26.8765	26.464	27.2337	27.3116	26.9182	26.8802	27.089	27.7206	26.9562	27.1723	27.3941	27.6677	27.1745	27.6419	27.0224	27.4032	27.1842	26.8978	27.0171	26.655	27.2553	27.1249	27.2784	27.0361	26.8765	26.464
Tb427_020026500	Tb427_020026500.1	http://tritrypdb.org/tritrypdb/processQuestion.do?questionFullName=GeneQuestions.GeneByLocusTag&questionSubmit=Get+Answer&ds_gene_ids_data=Tb427_020026500.1	Tb427_020026500	Tb427_020026500	Tb927.2.5180:mRNA-p1	Tb927.2.5180:mRNA-p1;Tb927.11.4700:mRNA-p1;Tb927.11.5360:mRNA-p1	Aldo/keto reductase family, putative	11	11	11	51	38.278	339	27.8206	27.6319	27.5118	27.7407	28.3253	28.0156	27.95	28.0146	28.4436	28.1738	27.8092	27.7698	28.2017	28.3256	28.0186	27.9654	27.9006	28.3565	28.2692	28.0919	27.8752	28.3665	27.9478	28.0385	27.8206	27.6319	27.5118	27.7407	28.3253	28.0156	27.95	28.0146	28.4436	28.1738	27.8092	27.7698
Tb427_110058600	Tb427_110058600.1	http://tritrypdb.org/tritrypdb/processQuestion.do?questionFullName=GeneQuestions.GeneByLocusTag&questionSubmit=Get+Answer&ds_gene_ids_data=Tb427_110058600.1	Tb427_110058600	Tb427_110058600	Tb927.11.5360:mRNA-p1	Tb927.11.5360:mRNA-p1;Tb927.11.4700:mRNA-p1;Tb927.2.5180:mRNA-p1	Aldo/keto reductase family, putative	9	9	9	41.3	35.13	312	27.5994	28.0068	27.1595		26.9611	27.4458	27.5825		28.2217	27.1489	26.8948	26.8945	26.7295	27.7353	26.6618	27.0146	27.986	27.5387	27.3664	27.2311	26.8623	27.2099	27.9779	26.9732	27.5994	28.0068	27.1595	25.4449	26.9611	27.4458	27.5825	24.4695	28.2217	27.1489	26.8948	26.8945
Tb427_110051900	Tb427_110051900.1	http://tritrypdb.org/tritrypdb/processQuestion.do?questionFullName=GeneQuestions.GeneByLocusTag&questionSubmit=Get+Answer&ds_gene_ids_data=Tb427_110051900.1	Tb427_110051900	Tb427_110051900	Tb927.11.4700:mRNA-p1	Tb927.11.4700:mRNA-p1;Tb927.11.5360:mRNA-p1;Tb927.2.5180:mRNA-p1	Aldo/keto reductase family, putative	26	26	26	89.1	30.992	276	35.7265	35.7075	35.7593	35.7395	34.934	35.1844	35.0969	35.3909	34.884	34.9962	34.7453	34.9278	34.7155	34.8353	34.6354	34.7126	34.3983	34.0499	34.6162	34.8985	34.1842	33.8563	34.4739	34.472	35.7265	35.7075	35.7593	35.7395	34.934	35.1844	35.0969	35.3909	34.884	34.9962	34.7453	34.9278
Tb427_040015900	Tb427_040015900.1	http://tritrypdb.org/tritrypdb/processQuestion.do?questionFullName=GeneQuestions.GeneByLocusTag&questionSubmit=Get+Answer&ds_gene_ids_data=Tb427_040015900.1	Tb427_040015900	Tb427_040015900	Tb927.4.1360:mRNA-p1	Tb927.4.1360:mRNA-p1	Aldose 1-epimerase, putative	14	14	14	60.1	32.547	293	31.6888	31.8123	31.693	31.1993	31.7461	31.5419	31.4445	31.291	31.4064	31.4989	31.3085	31.0083	31.3035	31.4883	31.4817	31.1332	31.2973	31.6226	31.2057	31.2471	31.2182	31.3619	31.2981	30.6353	31.6888	31.8123	31.693	31.1993	31.7461	31.5419	31.4445	31.291	31.4064	31.4989	31.3085	31.0083
Tb427_100059600	Tb427_100059600.1	http://tritrypdb.org/tritrypdb/processQuestion.do?questionFullName=GeneQuestions.GeneByLocusTag&questionSubmit=Get+Answer&ds_gene_ids_data=Tb427_100059600.1	Tb427_100059600	Tb427_100059600	Tb927.10.5560:mRNA-p1	Tb927.10.5560:mRNA-p1	Alg9-like mannosyltransferase family, putative	13	13	13	23.8	67.388	589	27.1932	27.3562	27.017	26.4767	27.4938	27.3227	27.4852	27.2687	27.4396	27.1966	27.656	27.5007	27.3039	27.8731	27.4871	27.8754	27.8341	28.1464	27.9685	27.8226	28.3536	27.7676	27.8791	28.0369	27.1932	27.3562	27.017	26.4767	27.4938	27.3227	27.4852	27.2687	27.4396	27.1966	27.656	27.5007
Tb427_060015000	Tb427_060015000.1	http://tritrypdb.org/tritrypdb/processQuestion.do?questionFullName=GeneQuestions.GeneByLocusTag&questionSubmit=Get+Answer&ds_gene_ids_data=Tb427_060015000.1	Tb427_060015000	Tb427_060015000	Tb927.6.1140:mRNA-p1	Tb927.6.1140:mRNA-p1	Alg9-like mannosyltransferase family, putative	11	11	11	19.9	75.155	674	28.0533	27.9884	27.5026	27.5454	28.0388	28.0381	28.3458	26.953	28.289	28.1663	27.9194	28.0327	28.0938	28.2993	28.1427	28.0165	27.673	28.486	28.1657	28.1189	28.0283	28.7724	28.0811	27.9507	28.0533	27.9884	27.5026	27.5454	28.0388	28.0381	28.3458	26.953	28.289	28.1663	27.9194	28.0327
Tb427_110159400	Tb427_110159400.1	http://tritrypdb.org/tritrypdb/processQuestion.do?questionFullName=GeneQuestions.GeneByLocusTag&questionSubmit=Get+Answer&ds_gene_ids_data=Tb427_110159400.1	Tb427_110159400	Tb427_110159400	Tb927.11.14160:mRNA-p1	Tb927.11.14160:mRNA-p1	Alpha/beta hydrolase family, putative	12	12	12	49.1	36.195	328	29.5008	29.4722	28.959	29.0304	29.4809	29.3751	29.3044	28.7465	29.5372	29.1508	28.9574	29.0027	29.3346	29.2547	29.0504	28.9959	29.3232	29.2147	29.109	29.1132	29.1454	29.3021	29.1702	29.2057	29.5008	29.4722	28.959	29.0304	29.4809	29.3751	29.3044	28.7465	29.5372	29.1508	28.9574	29.0027
Tb427_050030100	Tb427_050030100.1	http://tritrypdb.org/tritrypdb/processQuestion.do?questionFullName=GeneQuestions.GeneByLocusTag&questionSubmit=Get+Answer&ds_gene_ids_data=Tb427_050030100.1	Tb427_050030100	Tb427_050030100	Tb927.5.2380:mRNA-p1	Tb927.5.2380:mRNA-p1;Tb927.5.2370:mRNA-p1	alpha/beta hydrolase fold/Alpha/beta hydrolase family/Serine aminopeptidase, S33/Ndr family, putative	14	14	14	50	34.414	312	27.941	28.4793	28.0828	27.9808	28.3356	27.7831	28.5165	28.1648	27.9738	28.025	27.9136	28.2201	27.731	28.2007	28.436	28.5136	28.038	29.4432	28.1926	28.4067	28.9402	29.5941	28.5814	28.6349	27.941	28.4793	28.0828	27.9808	28.3356	27.7831	28.5165	28.1648	27.9738	28.025	27.9136	28.2201
Tb427_050030000	Tb427_050030000.1	http://tritrypdb.org/tritrypdb/processQuestion.do?questionFullName=GeneQuestions.GeneByLocusTag&questionSubmit=Get+Answer&ds_gene_ids_data=Tb427_050030000.1	Tb427_050030000	Tb427_050030000	Tb927.5.2370:mRNA-p1	Tb927.5.2370:mRNA-p1;Tb927.5.2380:mRNA-p1	alpha/beta hydrolase fold/Serine aminopeptidase, S33/Alpha/beta hydrolase family, putative	10	10	10	33.9	43.268	401	26.8684	26.4277	26.1764	27.0195	25.4428	26.322	26.7535	26.2901	26.924	26.2279	26.6255	26.5121	26.37	26.5769	26.751	26.9648	26.8008	28.2126	26.9379	27.107	27.0454	27.5433	26.7818	27.0494	26.8684	26.4277	26.1764	27.0195	25.4428	26.322	26.7535	26.2901	26.924	26.2279	26.6255	26.5121
Tb427_040053100	Tb427_040053100.1	http://tritrypdb.org/tritrypdb/processQuestion.do?questionFullName=GeneQuestions.GeneByLocusTag&questionSubmit=Get+Answer&ds_gene_ids_data=Tb427_040053100.1	Tb427_040053100	Tb427_040053100	Tb927.4.4970:mRNA-p1	Tb927.4.4970:mRNA-p1;Tb927.8.7450:mRNA-p1	Alpha-kinase family, putative	5	5	2	19.3	37.124	327		26.7718	26.6929	26.848	27.0322	27.0942	27.7641	26.5316	27.3459	27.1381	27.4265	27.0131		27.2382	26.8954	27.4062	26.4682	26.4158	26.7977	27.0129	26.0735		26.6237		24.7908	26.7718	26.6929	26.848	27.0322	27.0942	27.7641	26.5316	27.3459	27.1381	27.4265	27.0131
Tb427_080080300	Tb427_080080300.1	http://tritrypdb.org/tritrypdb/processQuestion.do?questionFullName=GeneQuestions.GeneByLocusTag&questionSubmit=Get+Answer&ds_gene_ids_data=Tb427_080080300.1	Tb427_080080300	Tb427_080080300	Tb927.8.7450:mRNA-p1	Tb927.8.7450:mRNA-p1;Tb927.4.4970:mRNA-p1	Alpha-kinase family, putative	5	2	2	19	36.892	327		26.0557			25.8189														26.3131			26.8602	25.6575	27.0116	24.4806	26.0557	24.2582	24.8769	25.8189	24.2648	24.2925	24.6292	24.9984	24.6031	24.8539	24.527
Tb427_100076900	Tb427_100076900.1	http://tritrypdb.org/tritrypdb/processQuestion.do?questionFullName=GeneQuestions.GeneByLocusTag&questionSubmit=Get+Answer&ds_gene_ids_data=Tb427_100076900.1	Tb427_100076900	Tb427_100076900	Tb927.10.7090:mRNA-p1	Tb927.10.7090:mRNA-p1;Tb927.10.9760:mRNA-p1	Alternative oxidase, putative	28	28	28	74.2	37.59	329	30.1848	30.2257	30.067	29.7414	33.5831	33.3806	33.5716	33.1645	34.1809	33.9135	34.0966	34.1348	33.8786	34.2415	34.2268	34.2956	33.7718	34.6219	34.5354	34.3839	34.4224	34.5123	34.616	34.7474	30.1848	30.2257	30.067	29.7414	33.5831	33.3806	33.5716	33.1645	34.1809	33.9135	34.0966	34.1348
Tb427_100104400	Tb427_100104400.1	http://tritrypdb.org/tritrypdb/processQuestion.do?questionFullName=GeneQuestions.GeneByLocusTag&questionSubmit=Get+Answer&ds_gene_ids_data=Tb427_100104400.1	Tb427_100104400	Tb427_100104400	Tb927.10.9760:mRNA-p1	Tb927.10.9760:mRNA-p1;Tb927.10.7090:mRNA-p1	Alternative oxidase, putative	8	8	8	30.8	39.733	351	27.757	27.8098	28.027	27.6627	27.4019	27.7409	28.032	27.6359	28.0224	27.6807	27.8589	27.7698	27.5102	27.6677	27.9359	28.1333	27.7891	28.0873	28.0515	27.8532	27.7567	27.8168	28.1336	27.9907	27.757	27.8098	28.027	27.6627	27.4019	27.7409	28.032	27.6359	28.0224	27.6807	27.8589	27.7698
Tb427_110092200	Tb427_110092200.1	http://tritrypdb.org/tritrypdb/processQuestion.do?questionFullName=GeneQuestions.GeneByLocusTag&questionSubmit=Get+Answer&ds_gene_ids_data=Tb427_110092200.1	Tb427_110092200	Tb427_110092200	Tb927.11.8450:mRNA-p1	Tb927.11.8450:mRNA-p1;Tb927.11.8460:mRNA-p1	Amastin surface glycoprotein, putative	10	10	10	45.5	32.153	297	28.5354	28.5131	28.1931	28.1135	29.6311	29.3389	29.3954	29.2783	28.9348	29.0782	29.2785	29.6748	29.5865	29.4889	29.5473	29.505	29.8429	29.5515	29.2634	29.9279	29.7889	29.8512	29.866	29.5393	28.5354	28.5131	28.1931	28.1135	29.6311	29.3389	29.3954	29.2783	28.9348	29.0782	29.2785	29.6748
Tb427_040037800	Tb427_040037800.1	http://tritrypdb.org/tritrypdb/processQuestion.do?questionFullName=GeneQuestions.GeneByLocusTag&questionSubmit=Get+Answer&ds_gene_ids_data=Tb427_040037800.1	Tb427_040037800	Tb427_040037800	Tb927.4.3500:mRNA-p1	Tb927.4.3500:mRNA-p1;Tb927.4.3520:mRNA-p1;Tb927.4.3480:mRNA-p1	Amastin surface glycoprotein, putative	6	6	5	21	19.5	176	29.6851	29.9323	30.1174	29.2346	30.0774	29.7149	30.1288	30.3913	29.8861	29.7918	29.9564	30.1988	30.0285	29.7703	30.1176	29.8416	30.4182	29.4098	29.3896	30.2925	29.3405	29.4278	29.8089	29.7443	29.6851	29.9323	30.1174	29.2346	30.0774	29.7149	30.1288	30.3913	29.8861	29.7918	29.9564	30.1988
Tb427_080056100	Tb427_080056100.1	http://tritrypdb.org/tritrypdb/processQuestion.do?questionFullName=GeneQuestions.GeneByLocusTag&questionSubmit=Get+Answer&ds_gene_ids_data=Tb427_080056100.1	Tb427_080056100	Tb427_080056100	Tb927.8.5080:mRNA-p1	Tb927.8.5080:mRNA-p1	Amidase, putative	4	4	4	8.6	65.46	595																		28.372			28.1344	28.3193		28.2608	25.1405	24.8473	24.6838	24.9042	24.4296	24.419	24.5104	24.3183	24.5328	25.0256	24.808	24.8338
Tb427_040015300	Tb427_040015300.1	http://tritrypdb.org/tritrypdb/processQuestion.do?questionFullName=GeneQuestions.GeneByLocusTag&questionSubmit=Get+Answer&ds_gene_ids_data=Tb427_040015300.1	Tb427_040015300	Tb427_040015300	Tb927.4.1300:mRNA-p1	Tb927.4.1300:mRNA-p1	Amidinotransferase, putative	31	31	31	73.5	41.999	374	34.6506	34.4735	34.4369	34.2654	34.5918	34.3789	34.4337	34.5401	34.6577	34.5303	34.6242	34.6145	34.7293	34.4201	34.3955	34.4636	34.4581	34.3607	34.6221	34.354	34.2683	34.2946	34.7636	34.2607	34.6506	34.4735	34.4369	34.2654	34.5918	34.3789	34.4337	34.5401	34.6577	34.5303	34.6242	34.6145
Tb427_080061700	Tb427_080061700.1	http://tritrypdb.org/tritrypdb/processQuestion.do?questionFullName=GeneQuestions.GeneByLocusTag&questionSubmit=Get+Answer&ds_gene_ids_data=Tb427_080061700.1	Tb427_080061700	Tb427_080061700	Tb927.8.5630:mRNA-p1	Tb927.8.5630:mRNA-p1	Amidohydrolase family, putative	13	13	13	45.6	43.022	390	29.4318	29.5712	29.4146	29.6813	29.7532	29.3513	29.2094	29.6357	29.4096	29.2939	29.1057	29.1641	29.4785	29.0472	29.2211	28.9686	29.3281	28.8055	29.1499	28.9847	28.8038	28.8274	28.9783	29.0944	29.4318	29.5712	29.4146	29.6813	29.7532	29.3513	29.2094	29.6357	29.4096	29.2939	29.1057	29.1641
Tb427_050053000	Tb427_050053000.1	http://tritrypdb.org/tritrypdb/processQuestion.do?questionFullName=GeneQuestions.GeneByLocusTag&questionSubmit=Get+Answer&ds_gene_ids_data=Tb427_050053000.1	Tb427_050053000	Tb427_050053000	Tb927.5.4560:mRNA-p1	Tb927.5.4560:mRNA-p1;Tb05.5K5.200:mRNA-p1;Tb11.v5.0409.1-p1	Amidohydrolase family, putative	17	17	17	47.3	55.291	516	30.0753	30.1821	30.2385	30.1904	29.1617	29.0907	29.2451	29.3592	28.7736	28.973	28.7851	28.579	28.7709	28.7775	28.447	28.5187	28.4484	28.4343	28.2738	28.3446	28.2324	28.0326	28.1191	28.6566	30.0753	30.1821	30.2385	30.1904	29.1617	29.0907	29.2451	29.3592	28.7736	28.973	28.7851	28.579
Tb427_110071800	Tb427_110071800.1	http://tritrypdb.org/tritrypdb/processQuestion.do?questionFullName=GeneQuestions.GeneByLocusTag&questionSubmit=Get+Answer&ds_gene_ids_data=Tb427_110071800.1	Tb427_110071800	Tb427_110071800	Tb927.11.6680:mRNA-p1	Tb927.11.6680:mRNA-p1;Tb927.9.10340:mRNA-p1	Amino acid permease, putative	2	2	2	5.5	56.104	507	26.0028	26.1284	25.9658		26.5793	26.5137	26.2563	26.1716	25.9383	26.4134	26.6626	26.2053	26.4647	26.6242	26.6823	26.3774	26.1188	25.9007	25.787	26.1727	26.0978	25.9666	26.0423	25.6017	26.0028	26.1284	25.9658	25.2467	26.5793	26.5137	26.2563	26.1716	25.9383	26.4134	26.6626	26.2053
Tb427_100015600	Tb427_100015600.1	http://tritrypdb.org/tritrypdb/processQuestion.do?questionFullName=GeneQuestions.GeneByLocusTag&questionSubmit=Get+Answer&ds_gene_ids_data=Tb427_100015600.1	Tb427_100015600	Tb427_100015600	Tb927.10.1250:mRNA-p1	Tb927.10.1250:mRNA-p1	Aminoacyl-tRNA editing domain containing protein, putative	17	17	17	77	29.453	261	30.6394	30.9016	30.7457	30.3028	30.588	30.8052	30.9203	30.579	30.6836	30.6017	30.8258	30.7145	30.6513	30.6641	30.6598	30.8717	30.3592	30.3335	30.4607	30.633	30.5065	30.4081	30.393	30.7327	30.6394	30.9016	30.7457	30.3028	30.588	30.8052	30.9203	30.579	30.6836	30.6017	30.8258	30.7145
Tb427_100136100	Tb427_100136100.1	http://tritrypdb.org/tritrypdb/processQuestion.do?questionFullName=GeneQuestions.GeneByLocusTag&questionSubmit=Get+Answer&ds_gene_ids_data=Tb427_100136100.1	Tb427_100136100	Tb427_100136100	Tb927.10.12890:mRNA-p1	Tb927.10.12890:mRNA-p1	Aminoacyl-tRNA editing domain/tRNA synthetase class II core domain (G, H, P, S and T)/Anticodon binding domain/Prolyl-tRNA synthetase, C-terminal, putative	49	49	49	74.5	80.557	715	33.97	34.0131	33.8619	33.8068	34.0395	34.0012	33.8162	33.9382	33.9569	34.0027	33.9907	33.962	33.9539	34.0722	33.8196	33.9609	33.9128	33.9665	33.5863	33.9961	33.8283	33.9052	33.7667	33.6948	33.97	34.0131	33.8619	33.8068	34.0395	34.0012	33.8162	33.9382	33.9569	34.0027	33.9907	33.962
Tb427_080070500	Tb427_080070500.1	http://tritrypdb.org/tritrypdb/processQuestion.do?questionFullName=GeneQuestions.GeneByLocusTag&questionSubmit=Get+Answer&ds_gene_ids_data=Tb427_080070500.1	Tb427_080070500	Tb427_080070500	Tb927.8.6480:mRNA-p1	Tb927.8.6480:mRNA-p1	Aminomethyltransferase folate-binding domain containing protein, putative	15	15	15	56.6	36.96	339	29.3357	29.3632	28.9639	29.064	29.243	29.3605	29.4869	28.8438	29.3102	29.389	29.1772	29.2487	29.6101	29.7883	29.583	29.5897	29.3171	29.8912	29.5177	30.0127	30.1483	29.8407	29.575	30.4745	29.3357	29.3632	28.9639	29.064	29.243	29.3605	29.4869	28.8438	29.3102	29.389	29.1772	29.2487
Tb427_110105100	Tb427_110105100.1	http://tritrypdb.org/tritrypdb/processQuestion.do?questionFullName=GeneQuestions.GeneByLocusTag&questionSubmit=Get+Answer&ds_gene_ids_data=Tb427_110105100.1	Tb427_110105100	Tb427_110105100	Tb927.11.9670:mRNA-p1	Tb927.11.9670:mRNA-p1	Aminomethyltransferase folate-binding domain/Glycine cleavage T-protein C-terminal barrel domain containing protein, putative	17	17	17	50.9	41.168	375	30.7325	30.757	30.7169	30.7502	31.0679	30.8458	31.0468	31.0748	31.3065	30.9222	31.1562	31.1657	31.2487	31.1886	31.2898	31.4131	31.4708	31.3607	31.5315	31.3512	31.3672	31.2561	31.6203	31.9375	30.7325	30.757	30.7169	30.7502	31.0679	30.8458	31.0468	31.0748	31.3065	30.9222	31.1562	31.1657
Tb427_030034700	Tb427_030034700.1	http://tritrypdb.org/tritrypdb/processQuestion.do?questionFullName=GeneQuestions.GeneByLocusTag&questionSubmit=Get+Answer&ds_gene_ids_data=Tb427_030034700.1	Tb427_030034700	Tb427_030034700	Tb927.3.3410:mRNA-p1	Tb927.3.3410:mRNA-p1;Tb11.v5.0768.1-p1	Aminopeptidase I zinc metalloprotease (M18)/M42 glutamyl aminopeptidase, putative	27	27	27	75.4	49.327	451	32.1978	32.2685	32.0113	32.1706	31.9507	32.0696	31.979	32.2279	32.2653	32.412	32.2927	32.419	32.3559	32.3853	32.1248	32.5272	32.4622	32.3699	32.3689	32.6056	32.3808	32.3931	32.3257	32.6349	32.1978	32.2685	32.0113	32.1706	31.9507	32.0696	31.979	32.2279	32.2653	32.412	32.2927	32.419
Tb427_090080800	Tb427_090080800.1	http://tritrypdb.org/tritrypdb/processQuestion.do?questionFullName=GeneQuestions.GeneByLocusTag&questionSubmit=Get+Answer&ds_gene_ids_data=Tb427_090080800.1	Tb427_090080800	Tb427_090080800	Tb927.9.13490:mRNA-p1	Tb927.9.13490:mRNA-p1	Aminopeptidase P, N-terminal domain/Metallopeptidase family M24, putative	17	17	17	46.6	54.408	489	31.0492	31.0178	30.9236	30.627	31.1952	30.9555	30.7584	30.7326	31.0222	30.7425	30.8011	30.5129	30.8069	30.8243	30.533	30.5868	30.6597	30.3089	30.414	30.7177	30.4534	30.4658	30.6257	30.592	31.0492	31.0178	30.9236	30.627	31.1952	30.9555	30.7584	30.7326	31.0222	30.7425	30.8011	30.5129
Tb427_100041200	Tb427_100041200.1	http://tritrypdb.org/tritrypdb/processQuestion.do?questionFullName=GeneQuestions.GeneByLocusTag&questionSubmit=Get+Answer&ds_gene_ids_data=Tb427_100041200.1	Tb427_100041200	Tb427_100041200	Tb927.10.3660:mRNA-p1	Tb927.10.3660:mRNA-p1;Tb927.11.5090:mRNA-p1	Aminotransferase class I and II, putative	30	30	30	75.7	44.787	403	32.74	32.8271	32.7502	32.7567	33.2839	33.3176	33.3816	33.1717	33.2413	33.1803	33.2322	33.244	33.0192	33.0806	33.1279	33.2361	32.7803	32.522	33.1756	32.998	32.838	32.6597	33.3455	33.0764	32.74	32.8271	32.7502	32.7567	33.2839	33.3176	33.3816	33.1717	33.2413	33.1803	33.2322	33.244
Tb427_010027700	Tb427_010027700.1	http://tritrypdb.org/tritrypdb/processQuestion.do?questionFullName=GeneQuestions.GeneByLocusTag&questionSubmit=Get+Answer&ds_gene_ids_data=Tb427_010027700.1	Tb427_010027700	Tb427_010027700	Tb927.1.3950:mRNA-p1	Tb927.1.3950:mRNA-p1	Aminotransferase class I and II, putative	28	28	28	67.5	55.704	504	32.4623	32.4624	32.5119	31.9783	33.0222	32.8092	32.7467	32.8184	33.0799	33.0645	32.9773	32.9453	33.2532	33.3236	33.0177	33.1942	33.0499	33.6503	33.3488	33.49	33.3595	33.5366	33.3511	33.6772	32.4623	32.4624	32.5119	31.9783	33.0222	32.8092	32.7467	32.8184	33.0799	33.0645	32.9773	32.9453
Tb427_040012100	Tb427_040012100.1	http://tritrypdb.org/tritrypdb/processQuestion.do?questionFullName=GeneQuestions.GeneByLocusTag&questionSubmit=Get+Answer&ds_gene_ids_data=Tb427_040012100.1	Tb427_040012100	Tb427_040012100	Tb927.4.1020:mRNA-p1	Tb927.4.1020:mRNA-p1;Tb927.8.6060:mRNA-p1;Tb11.v5.0649.1-p1;Tb927.10.4050:mRNA-p1	Aminotransferase class I and II, putative	20	20	20	52.4	54.128	490	30.0987	29.8375	30.1183	29.6928	30.3587	29.7869	30.1285	29.9314	30.0547	30.131	30.1046	29.6188	30.534	30.1245	30.0842	29.9116	30.3423	30.4031	30.0499	30.0627	30.4611	30.4243	30.1026	29.8175	30.0987	29.8375	30.1183	29.6928	30.3587	29.7869	30.1285	29.9314	30.0547	30.131	30.1046	29.6188
Tb427_110056000	Tb427_110056000.1	http://tritrypdb.org/tritrypdb/processQuestion.do?questionFullName=GeneQuestions.GeneByLocusTag&questionSubmit=Get+Answer&ds_gene_ids_data=Tb427_110056000.1	Tb427_110056000	Tb427_110056000	Tb927.11.5090:mRNA-p1	Tb927.11.5090:mRNA-p1;Tb927.10.3660:mRNA-p1	Aminotransferase class I and II, putative	24	24	23	72.7	45.932	417	29.5298	29.724	28.5873	29.79	29.8918	29.0588	28.9886	29.8344	30.2792	29.525	29.452	29.3392	30.367	29.6556	29.3114	30.0417	31.3335	29.4145	29.4636	29.6922	30.3409	29.6179	29.5713	29.7598	29.5298	29.724	28.5873	29.79	29.8918	29.0588	28.9886	29.8344	30.2792	29.525	29.452	29.3392
Tb427_100044900	Tb427_100044900.1	http://tritrypdb.org/tritrypdb/processQuestion.do?questionFullName=GeneQuestions.GeneByLocusTag&questionSubmit=Get+Answer&ds_gene_ids_data=Tb427_100044900.1	Tb427_100044900	Tb427_100044900	Tb927.10.4050:mRNA-p1	Tb927.10.4050:mRNA-p1;Tb11.v5.0649.1-p1;Tb927.8.6060:mRNA-p1;Tb927.4.1020:mRNA-p1	Aminotransferase class I and II, putative	15	15	15	32.5	61.364	557	29.0586	27.8827	29.3097	27.0937	28.3028	27.964	27.6444	27.1887	26.7562	26.9912	27.0349	26.1464	27.341	26.7603	26.8908	26.5405	25.7725	25.5904	25.5557			26.2911			29.0586	27.8827	29.3097	27.0937	28.3028	27.964	27.6444	27.1887	26.7562	26.9912	27.0349	26.1464
Tb427_100127100	Tb427_100127100.1	http://tritrypdb.org/tritrypdb/processQuestion.do?questionFullName=GeneQuestions.GeneByLocusTag&questionSubmit=Get+Answer&ds_gene_ids_data=Tb427_100127100.1	Tb427_100127100	Tb427_100127100	Tb927.10.11970:mRNA-p1	Tb927.10.11970:mRNA-p1	Aminotransferase class I and II/Aminotransferase class-V/DegT/DnrJ/EryC1/StrS aminotransferase family, putative	22	22	22	65.7	48.333	429	32.8051	33.0281	32.0856	32.4832	33.5057	33.3336	32.7959	33.19	33.2779	33.2978	33.0722	33.0519	33.3448	33.2923	33.1437	33.401	33.4335	32.9718	32.9801	32.8943	32.9474	33.2653	33.1232	32.6112	32.8051	33.0281	32.0856	32.4832	33.5057	33.3336	32.7959	33.19	33.2779	33.2978	33.0722	33.0519
Tb427_080066300	Tb427_080066300.1	http://tritrypdb.org/tritrypdb/processQuestion.do?questionFullName=GeneQuestions.GeneByLocusTag&questionSubmit=Get+Answer&ds_gene_ids_data=Tb427_080066300.1	Tb427_080066300	Tb427_080066300	Tb927.8.6060:mRNA-p1	Tb927.8.6060:mRNA-p1;Tb11.v5.0649.1-p1;Tb927.10.4050:mRNA-p1;Tb927.4.1020:mRNA-p1	Aminotransferase class I and II/Beta-eliminating lyase/Serine hydroxymethyltransferase, putative	28	28	28	74.3	43.734	404	34.9777	35.1475	34.7623	35.0038	34.5145	34.6394	34.5847	34.7715	34.7268	34.8268	34.7225	34.9064	34.6565	35.0279	34.6928	35.0708	34.7786	34.498	34.8269	35.3119	34.7631	34.5407	34.7922	35.2384	34.9777	35.1475	34.7623	35.0038	34.5145	34.6394	34.5847	34.7715	34.7268	34.8268	34.7225	34.9064
Tb427_040024800	Tb427_040024800.1	http://tritrypdb.org/tritrypdb/processQuestion.do?questionFullName=GeneQuestions.GeneByLocusTag&questionSubmit=Get+Answer&ds_gene_ids_data=Tb427_040024800.1	Tb427_040024800	Tb427_040024800	Tb927.4.2240:mRNA-p1	Tb927.4.2240:mRNA-p1	Amino-transferase class IV, putative	27	27	27	77.9	44.218	390	32.0791	32.4665	31.7942	31.8249	32.2631	32.5252	32.3931	32.0027	32.4171	32.6233	32.4977	32.5249	32.5279	32.7841	32.461	32.6274	32.5538	32.8908	32.6823	32.8772	32.8417	32.923	32.7483	33.0151	32.0791	32.4665	31.7942	31.8249	32.2631	32.5252	32.3931	32.0027	32.4171	32.6233	32.4977	32.5249
Tb427_020022000	Tb427_020022000.1;Tb427_020021900.1	http://tritrypdb.org/tritrypdb/processQuestion.do?questionFullName=GeneQuestions.GeneByLocusTag&questionSubmit=Get+Answer&ds_gene_ids_data=Tb427_020022000.1,Tb427_020021900.1	Tb427_020022000;Tb427_020021900	Tb427_020022000	Tb927.2.4610:mRNA-p1;Tb927.2.4590:mRNA-p1	Tb927.2.4610:mRNA-p1;Tb927.2.4590:mRNA-p1;Tb11.v5.0820.1-p1	Amino-transferase class IV, putative	26	26	26	78.5	40.549	367	33.2151	33.4021	32.8742	32.9428	33.298	33.3628	33.1994	33.3176	33.3216	33.2689	33.3501	33.3817	33.3741	33.4163	33.2815	33.5397	33.4089	33.6192	33.4724	33.5365	33.5669	33.6232	33.5624	33.7049	33.2151	33.4021	32.8742	32.9428	33.298	33.3628	33.1994	33.3176	33.3216	33.2689	33.3501	33.3817
Tb427_090011500	Tb427_090011500.1	http://tritrypdb.org/tritrypdb/processQuestion.do?questionFullName=GeneQuestions.GeneByLocusTag&questionSubmit=Get+Answer&ds_gene_ids_data=Tb427_090011500.1	Tb427_090011500	Tb427_090011500	Tb927.9.2010:mRNA-p1	Tb927.9.2010:mRNA-p1	Aminotransferase class-V, putative	21	21	21	53.8	50.684	463	31.4875	31.4635	31.0381	31.0477	31.1472	31.4233	31.043	30.9132	31.1868	31.1923	31.002	30.9803	31.1833	31.2646	30.9484	31.0332	31.3698	31.1099	30.9642	31.4706	30.9828	31.2168	31.1428	31.2473	31.4875	31.4635	31.0381	31.0477	31.1472	31.4233	31.043	30.9132	31.1868	31.1923	31.002	30.9803
Tb427_110021400	Tb427_110021400.1	http://tritrypdb.org/tritrypdb/processQuestion.do?questionFullName=GeneQuestions.GeneByLocusTag&questionSubmit=Get+Answer&ds_gene_ids_data=Tb427_110021400.1	Tb427_110021400	Tb427_110021400	Tb927.11.1670:mRNA-p1	Tb927.11.1670:mRNA-p1;Tb927.9.12930:mRNA-p1	Aminotransferase class-V/Beta-eliminating lyase, putative	28	28	28	60.4	48.165	437	30.5887	30.8914	30.3531	30.6308	31.1326	31.0944	30.94	30.9068	31.3107	31.1823	31.1997	31.0204	31.4562	31.6799	31.2059	31.3297	31.7041	31.7474	31.7086	32.0483	31.9154	32.0679	31.8467	32.4705	30.5887	30.8914	30.3531	30.6308	31.1326	31.0944	30.94	30.9068	31.3107	31.1823	31.1997	31.0204
Tb427_110156500	Tb427_110156500.1	http://tritrypdb.org/tritrypdb/processQuestion.do?questionFullName=GeneQuestions.GeneByLocusTag&questionSubmit=Get+Answer&ds_gene_ids_data=Tb427_110156500.1	Tb427_110156500	Tb427_110156500	Tb927.11.13870:mRNA-p1	Tb927.11.13870:mRNA-p1	AMMECR1, putative	12	12	12	83.6	21.129	189	30.8466	30.8249	30.4018	30.2823	30.8019	30.8596	30.6284	30.5472	30.6504	30.8135	30.6676	30.815	30.7146	30.8411	30.5968	30.9976	30.7476	30.5081	30.4246	30.9695	30.5758	30.7423	30.6056	30.8523	30.8466	30.8249	30.4018	30.2823	30.8019	30.8596	30.6284	30.5472	30.6504	30.8135	30.6676	30.815
Tb427_090024600	Tb427_090024600.1	http://tritrypdb.org/tritrypdb/processQuestion.do?questionFullName=GeneQuestions.GeneByLocusTag&questionSubmit=Get+Answer&ds_gene_ids_data=Tb427_090024600.1	Tb427_090024600	Tb427_090024600	Tb927.9.4200:mRNA-p1	Tb927.9.4200:mRNA-p1;Tb927.9.4210:mRNA-p1;Tb927.9.4230:mRNA-p1;Tb927.10.3260:mRNA-p1;Tb927.9.4190:mRNA-p1;Tb11.v5.0561.1-p1;Tb11.v5.0825.1-p1;Tb927.11.4490:mRNA-p1;Tb927.11.7530:mRNA-p1	AMP-binding enzyme, putative	42	28	28	48.7	79.615	708	30.4491	30.8937	30.6304	31.1029	31.8311	31.8387	32.1473	32.5233	31.5181	31.8957	31.843	32.2272	31.4362	31.5584	31.907	32.2109	30.8474	30.8877	30.8397	31.4751	30.5817	30.8388	30.9546	30.4852	30.4491	30.8937	30.6304	31.1029	31.8311	31.8387	32.1473	32.5233	31.5181	31.8957	31.843	32.2272
Tb427_090024700	Tb427_090024700.1	http://tritrypdb.org/tritrypdb/processQuestion.do?questionFullName=GeneQuestions.GeneByLocusTag&questionSubmit=Get+Answer&ds_gene_ids_data=Tb427_090024700.1	Tb427_090024700	Tb427_090024700	Tb927.9.4210:mRNA-p1	Tb927.9.4210:mRNA-p1;Tb927.9.4230:mRNA-p1;Tb927.9.4200:mRNA-p1;Tb11.v5.0561.1-p1;Tb927.10.3260:mRNA-p1;Tb927.9.4190:mRNA-p1;Tb11.v5.0825.1-p1;Tb927.11.7530:mRNA-p1;Tb927.11.4490:mRNA-p1;Tb927.8.2520:mRNA-p1	AMP-binding enzyme, putative	47	47	7	61.8	77.881	702	32.6184	32.9557	32.8438	32.9031	33.832	33.825	34.021	34.1831	33.8159	33.967	33.8696	33.9662	33.6862	33.7437	34.0027	33.9617	33.6602	33.4565	33.282	33.7079	33.5046	33.3137	33.5366	33.4511	32.6184	32.9557	32.8438	32.9031	33.832	33.825	34.021	34.1831	33.8159	33.967	33.8696	33.9662
Tb427_090024800	Tb427_090024800.1	http://tritrypdb.org/tritrypdb/processQuestion.do?questionFullName=GeneQuestions.GeneByLocusTag&questionSubmit=Get+Answer&ds_gene_ids_data=Tb427_090024800.1	Tb427_090024800	Tb427_090024800	Tb927.9.4230:mRNA-p1	Tb927.9.4230:mRNA-p1;Tb927.9.4210:mRNA-p1;Tb927.9.4200:mRNA-p1;Tb11.v5.0561.1-p1;Tb927.10.3260:mRNA-p1;Tb927.9.4190:mRNA-p1;Tb11.v5.0825.1-p1;Tb927.11.4490:mRNA-p1;Tb927.11.7530:mRNA-p1	AMP-binding enzyme, putative	46	6	5	62.8	77.967	702	29.3077	29.456	28.9855	29.6033	29.8575	29.9818	29.9123	28.6968	29.5604	29.8003	29.8189	29.9496	29.7601	29.8296	29.5664	29.7808	29.7718	29.3359	29.1016	29.4304	29.1068	29.5193	29.2562	28.9069	29.3077	29.456	28.9855	29.6033	29.8575	29.9818	29.9123	28.6968	29.5604	29.8003	29.8189	29.9496
Tb427_110050000	Tb427_110050000.1	http://tritrypdb.org/tritrypdb/processQuestion.do?questionFullName=GeneQuestions.GeneByLocusTag&questionSubmit=Get+Answer&ds_gene_ids_data=Tb427_110050000.1	Tb427_110050000	Tb427_110050000	Tb927.11.4490:mRNA-p1	Tb927.11.4490:mRNA-p1;Tb927.9.4200:mRNA-p1;Tb927.9.4230:mRNA-p1;Tb927.9.4210:mRNA-p1;Tb927.10.3260:mRNA-p1;Tb11.v5.0561.1-p1	AMP-binding enzyme, putative	13	13	13	23.9	73.435	665	28.7943	28.8062	28.3644	28.3857	28.5956	29.1179	29.0755	28.6274	28.3782	28.9813	28.5932	28.7559	28.9637	29.4694	28.9758	29.1267	28.5141	29.5592	29.5421	29.5641	29.3917	29.3389	29.4039	29.0882	28.7943	28.8062	28.3644	28.3857	28.5956	29.1179	29.0755	28.6274	28.3782	28.9813	28.5932	28.7559
Tb427_060024400	Tb427_060024400.1	http://tritrypdb.org/tritrypdb/processQuestion.do?questionFullName=GeneQuestions.GeneByLocusTag&questionSubmit=Get+Answer&ds_gene_ids_data=Tb427_060024400.1	Tb427_060024400	Tb427_060024400	Tb927.6.2010:mRNA-p1	Tb927.6.2010:mRNA-p1	AMP-binding enzyme, putative	34	34	34	68.6	58.932	523	31.9092	31.8003	31.6934	31.552	31.8858	31.9741	31.917	31.7779	32.009	31.9184	31.6944	31.7379	31.9812	32.0343	31.9892	31.827	31.7296	31.936	31.9608	32.0616	31.7356	31.8806	32.0372	31.6636	31.9092	31.8003	31.6934	31.552	31.8858	31.9741	31.917	31.7779	32.009	31.9184	31.6944	31.7379
Tb427_100037500	Tb427_100037500.1	http://tritrypdb.org/tritrypdb/processQuestion.do?questionFullName=GeneQuestions.GeneByLocusTag&questionSubmit=Get+Answer&ds_gene_ids_data=Tb427_100037500.1	Tb427_100037500	Tb427_100037500	Tb927.10.3260:mRNA-p1	Tb927.10.3260:mRNA-p1;Tb927.9.4210:mRNA-p1;Tb927.9.4230:mRNA-p1;Tb927.9.4200:mRNA-p1;Tb11.v5.0825.1-p1;Tb927.9.4190:mRNA-p1;Tb11.v5.0561.1-p1;Tb927.11.7530:mRNA-p1;Tb927.11.4490:mRNA-p1	AMP-binding enzyme, putative	40	40	40	57.8	78.969	703	32.1191	32.4898	32.3157	32.4259	31.8927	31.9946	32.3126	32.6269	31.3612	31.6799	31.9169	32.1162	31.4761	31.7425	31.6907	32.1077	31.4715	31.2488	31.5312	31.8647	31.5715	31.5403	31.6804	31.972	32.1191	32.4898	32.3157	32.4259	31.8927	31.9946	32.3126	32.6269	31.3612	31.6799	31.9169	32.1162
Tb427_090024500	Tb427_090024500.1	http://tritrypdb.org/tritrypdb/processQuestion.do?questionFullName=GeneQuestions.GeneByLocusTag&questionSubmit=Get+Answer&ds_gene_ids_data=Tb427_090024500.1	Tb427_090024500	Tb427_090024500	Tb927.9.4190:mRNA-p1	Tb927.9.4190:mRNA-p1;Tb927.9.4200:mRNA-p1;Tb927.9.4230:mRNA-p1;Tb927.9.4210:mRNA-p1;Tb927.10.3260:mRNA-p1;Tb11.v5.0561.1-p1;Tb11.v5.0825.1-p1;Tb927.11.7530:mRNA-p1	AMP-binding enzyme, putative	35	35	35	57.4	78.972	698	31.8287	32.1832	31.9361	31.8365	31.4005	31.4656	31.5285	31.6428	31.1006	31.2413	31.1657	31.1654	31.134	31.1855	31.2061	31.1224	31.1123	30.733	30.8625	31.127	30.8436	30.6283	30.8602	30.9003	31.8287	32.1832	31.9361	31.8365	31.4005	31.4656	31.5285	31.6428	31.1006	31.2413	31.1657	31.1654
Tb427_110082000	Tb427_110082000.1	http://tritrypdb.org/tritrypdb/processQuestion.do?questionFullName=GeneQuestions.GeneByLocusTag&questionSubmit=Get+Answer&ds_gene_ids_data=Tb427_110082000.1	Tb427_110082000	Tb427_110082000	Tb927.11.7530:mRNA-p1	Tb927.11.7530:mRNA-p1;Tb927.9.4210:mRNA-p1;Tb927.9.4230:mRNA-p1;Tb927.10.3260:mRNA-p1;Tb11.v5.0561.1-p1;Tb927.9.4200:mRNA-p1;Tb927.9.4190:mRNA-p1	AMP-binding enzyme/AMP-binding enzyme C-terminal domain containing protein, putative	13	13	13	25	80.538	727	27.9429	27.7255	27.4768	27.5155	27.6094	27.9665	28.0745	27.8155	28.4194	28.381	28.5346	28.3938	28.2767	28.6537	28.3143	28.7146	28.5207	28.896	28.2979	29.0964	28.7049	28.8224	28.7739	29.0767	27.9429	27.7255	27.4768	27.5155	27.6094	27.9665	28.0745	27.8155	28.4194	28.381	28.5346	28.3938
Tb427_110078600	Tb427_110078600.1	http://tritrypdb.org/tritrypdb/processQuestion.do?questionFullName=GeneQuestions.GeneByLocusTag&questionSubmit=Get+Answer&ds_gene_ids_data=Tb427_110078600.1	Tb427_110078600	Tb427_110078600	Tb927.11.7290:mRNA-p1	Tb927.11.7290:mRNA-p1;Tb11.v5.0254.1-p1	AMP-binding enzyme/Fumble, putative	45	45	45	37.4	162.09	1467	30.9745	29.7457	31.6067	30.689	29.9546	28.9315	30.1833	29.9349	29.3445	27.8247	28.7302	28.4795	28.2032	27.3678	28.6825	28.9149	26.8968	26.9136	28.1371		25.8358	26.0028	27.7786	26.8748	30.9745	29.7457	31.6067	30.689	29.9546	28.9315	30.1833	29.9349	29.3445	27.8247	28.7302	28.4795
Tb427_100136900	Tb427_100136900.1	http://tritrypdb.org/tritrypdb/processQuestion.do?questionFullName=GeneQuestions.GeneByLocusTag&questionSubmit=Get+Answer&ds_gene_ids_data=Tb427_100136900.1	Tb427_100136900	Tb427_100136900	Tb927.10.12970:mRNA-p1	Tb927.10.12970:mRNA-p1	AN1-like Zinc finger containing protein, putative	3	3	3	13.5	32.998	303	24.733	24.5877	24.7687	24.8002	24.643	24.0661	23.6854		24.5903	24.6071	24.9884	25.2347	25.0465	23.8867	24.7244	25.1201	25.2	24.2877	25.6651	24.4043	24.8909	24.513	25.4696	24.4324	24.733	24.5877	24.7687	24.8002	24.643	24.0661	23.6854	25.1095	24.5903	24.6071	24.9884	25.2347
Tb427_050036800	Tb427_050036800.1	http://tritrypdb.org/tritrypdb/processQuestion.do?questionFullName=GeneQuestions.GeneByLocusTag&questionSubmit=Get+Answer&ds_gene_ids_data=Tb427_050036800.1	Tb427_050036800	Tb427_050036800	Tb927.5.3030:mRNA-p1	Tb927.5.3030:mRNA-p1;Tb927.10.14990:mRNA-p1	Anaphase-promoting complex subunit 4 WD40 domain containing protein, putative	52	52	52	47.6	140.66	1260	30.8591	31.1105	30.947	31.0536	31.1525	31.1828	31.0997	31.0852	30.915	31.0192	31.0368	30.7859	30.9969	31.0543	31.1383	31.048	30.8979	30.9659	30.948	31.1383	31.0825	31.2754	31.0875	31.1128	30.8591	31.1105	30.947	31.0536	31.1525	31.1828	31.0997	31.0852	30.915	31.0192	31.0368	30.7859
Tb427_110061000	Tb427_110061000.1	http://tritrypdb.org/tritrypdb/processQuestion.do?questionFullName=GeneQuestions.GeneByLocusTag&questionSubmit=Get+Answer&ds_gene_ids_data=Tb427_110061000.1	Tb427_110061000	Tb427_110061000	Tb927.11.5590:mRNA-p1	Tb927.11.5590:mRNA-p1	Anaphase-promoting complex subunit 4 WD40 domain containing protein, putative	11	11	11	18.6	82.592	749	27.0824	26.8143	26.8145	27.187	26.7394	26.9739	27.013	27.087	27.1664	26.9157	26.7095	26.9056	26.7367	27.0188	26.4096	26.9269	26.5376	26.9444	26.7141	26.5797	26.4525	27.0192	26.6006	26.6559	27.0824	26.8143	26.8145	27.187	26.7394	26.9739	27.013	27.087	27.1664	26.9157	26.7095	26.9056
Tb427_110158200	Tb427_110158200.1	http://tritrypdb.org/tritrypdb/processQuestion.do?questionFullName=GeneQuestions.GeneByLocusTag&questionSubmit=Get+Answer&ds_gene_ids_data=Tb427_110158200.1	Tb427_110158200	Tb427_110158200	Tb927.11.14040:mRNA-p1	Tb927.11.14040:mRNA-p1	Anaphase-promoting complex subunit 4 WD40 domain/RIC1, putative	4	4	4	5	137.57	1248			25.7138		25.3255		25.4729				25.173	25.1757									25.4345		25.3225		25.0431	24.734	25.7138	24.9897	25.3255	24.718	25.4729	24.5619	24.5535	24.4434	25.173	25.1757
Tb427_050039100	Tb427_050039100.1	http://tritrypdb.org/tritrypdb/processQuestion.do?questionFullName=GeneQuestions.GeneByLocusTag&questionSubmit=Get+Answer&ds_gene_ids_data=Tb427_050039100.1	Tb427_050039100	Tb427_050039100	Tb927.5.3260:mRNA-p1	Tb927.5.3260:mRNA-p1;Tb927.3.3610:mRNA-p1;Tb927.6.1830:mRNA-p1;Tb927.10.960:mRNA-p1;Tb11.v5.0631.1-p1;Tb927.9.9960:mRNA-p1;Tb927.10.1850:mRNA-p1;Tb927.8.5990:mRNA-p1;Tb927.4.450:mRNA-p1;Tb927.7.4700:mRNA-p1;Tb11.v5.0154.1-p1;Tb927.2.6050:mRNA-p1;Tb927.10.13960:mRNA-p1;Tb927.10.10170:mRNA-p1;Tb927.8.6770:mRNA-p1;Tb927.11.8120:mRNA-p1;Tb927.8.6500:mRNA-p1;Tb927.10.2860:mRNA-p1;Tb927.11.11360:mRNA-p…	Anaphase-promoting complex subunit 4 WD40 domain/WD domain, G-beta repeat, putative	41	41	41	42.9	149.02	1399	30.1287	30.375	29.9012	30.0036	30.4145	30.3854	30.3255	30.2743	30.6003	30.5493	30.6258	30.5958	30.6573	30.8893	30.7227	30.8637	30.7316	30.9227	30.718	31.1159	30.899	31.0081	30.9366	31.3061	30.1287	30.375	29.9012	30.0036	30.4145	30.3854	30.3255	30.2743	30.6003	30.5493	30.6258	30.5958
Tb427_030016400	Tb427_030016400.1	http://tritrypdb.org/tritrypdb/processQuestion.do?questionFullName=GeneQuestions.GeneByLocusTag&questionSubmit=Get+Answer&ds_gene_ids_data=Tb427_030016400.1	Tb427_030016400	Tb427_030016400	Tb927.3.1670:mRNA-p1	Tb927.3.1670:mRNA-p1;Tb927.2.4810:mRNA-p1;Tb927.9.9960:mRNA-p1	Anaphase-promoting complex subunit 4 WD40 domain/WD domain, G-beta repeat, putative	26	26	26	34.4	112.59	1027	29.8829	29.8362	29.425	29.2325	29.3726	29.5718	29.4155	29.2051	29.3178	29.1925	29.391	29.3416	29.4999	29.3153	29.4766	29.2581	29.2712	29.6835	29.5781	29.4661	29.5972	29.7986	29.6192	29.4351	29.8829	29.8362	29.425	29.2325	29.3726	29.5718	29.4155	29.2051	29.3178	29.1925	29.391	29.3416
Tb427_100110000	Tb427_100110000.1	http://tritrypdb.org/tritrypdb/processQuestion.do?questionFullName=GeneQuestions.GeneByLocusTag&questionSubmit=Get+Answer&ds_gene_ids_data=Tb427_100110000.1	Tb427_100110000	Tb427_100110000	Tb927.10.10330:mRNA-p1	Tb927.10.10330:mRNA-p1;Tb927.6.2150:mRNA-p1	Anaphase-promoting complex, cyclosome, subunit 3/Tetratricopeptide repeat, putative	13	13	13	32.1	62.877	557	28.0525	27.642	27.4037	27.454	27.9918	28.1661	27.8154	27.4823	27.8789	27.7816	27.3829	27.4092	28.0428	27.7307	27.5895	27.668	27.6682	27.6427	26.9902	27.5665	27.5422	27.7922	27.4854	27.2867	28.0525	27.642	27.4037	27.454	27.9918	28.1661	27.8154	27.4823	27.8789	27.7816	27.3829	27.4092
Tb427_090043500	Tb427_090043500.1	http://tritrypdb.org/tritrypdb/processQuestion.do?questionFullName=GeneQuestions.GeneByLocusTag&questionSubmit=Get+Answer&ds_gene_ids_data=Tb427_090043500.1	Tb427_090043500	Tb427_090043500	Tb927.9.7700:mRNA-p1	Tb927.9.7700:mRNA-p1;Tb927.10.3470:mRNA-p1;Tb927.11.12650:mRNA-p1;Tb927.10.10800:mRNA-p1;Tb927.7.1610:mRNA-p1;Tb927.3.2400:mRNA-p1;Tb927.3.2710:mRNA-p1;Tb927.8.3400:mRNA-p1;Tb927.10.4720:mRNA-p1;Tb927.9.13100:mRNA-p1;Tb927.11.14410:mRNA-p1;Tb927.9.15400:mRNA-p1;Tb927.11.6220:mRNA-p1	Ankyrin repeat/Ankyrin repeats (many copies)/Ankyrin repeats (3 copies)/DHHC palmitoyltransferase, putative	4	4	4	5.7	89.84	820		25.2696	25.6505		25.7217		25.307				25.0076														24.6979	25.2696	25.6505	24.537	25.7217	25.0179	25.307	24.411	24.3638	24.4979	25.0076	24.1948
Tb427_030043300	Tb427_030043300.1	http://tritrypdb.org/tritrypdb/processQuestion.do?questionFullName=GeneQuestions.GeneByLocusTag&questionSubmit=Get+Answer&ds_gene_ids_data=Tb427_030043300.1	Tb427_030043300	Tb427_030043300	Tb927.3.4040:mRNA-p1	Tb927.3.4040:mRNA-p1	Ankyrin repeats (3 copies), putative	32	32	32	62.8	67.646	619	32.3458	32.3566	32.204	32.2915	32.1497	32.059	32.0778	31.8302	32.0004	32.0154	31.6212	31.7213	32.0332	32.1041	31.9595	31.9828	31.6765	31.8049	31.6721	32.2361	31.7686	32.0185	31.7233	32.1699	32.3458	32.3566	32.204	32.2915	32.1497	32.059	32.0778	31.8302	32.0004	32.0154	31.6212	31.7213
Tb427_090050200	Tb427_090050200.1	http://tritrypdb.org/tritrypdb/processQuestion.do?questionFullName=GeneQuestions.GeneByLocusTag&questionSubmit=Get+Answer&ds_gene_ids_data=Tb427_090050200.1	Tb427_090050200	Tb427_090050200	Tb927.9.8990:mRNA-p1	Tb927.9.8990:mRNA-p1	Ankyrin repeats (3 copies)/Ankyrin repeat, putative	14	14	14	55.4	38.856	345	31.0586	30.9206	30.8419	30.7592	31.1813	30.8488	31.0177	30.8388	31.0368	30.7821	30.9072	30.6413	31.193	31.0023	30.9158	31.037	31.2148	30.8126	31.0864	31.0406	31.1086	31.0194	31.1876	31.4188	31.0586	30.9206	30.8419	30.7592	31.1813	30.8488	31.0177	30.8388	31.0368	30.7821	30.9072	30.6413
Tb427_100162900	Tb427_100162900.1	http://tritrypdb.org/tritrypdb/processQuestion.do?questionFullName=GeneQuestions.GeneByLocusTag&questionSubmit=Get+Answer&ds_gene_ids_data=Tb427_100162900.1	Tb427_100162900	Tb427_100162900	Tb927.10.15430:mRNA-p1	Tb927.10.15430:mRNA-p1;Tb927.4.1170:mRNA-p1	Ankyrin repeats (3 copies)/Ankyrin repeat, putative	14	14	14	32.7	59.535	554	28.3133	28.152	28.5136	28.7012	28.4812	28.0773	28.5711	28.7688	28.4523	28.554	28.2918	28.4498	28.2124	28.6088	28.4162	28.2392	28.4062	28.7797	27.9243	28.0649	28.4932	28.6972	28.2082	28.6598	28.3133	28.152	28.5136	28.7012	28.4812	28.0773	28.5711	28.7688	28.4523	28.554	28.2918	28.4498
Tb427_100045000	Tb427_100045000.1	http://tritrypdb.org/tritrypdb/processQuestion.do?questionFullName=GeneQuestions.GeneByLocusTag&questionSubmit=Get+Answer&ds_gene_ids_data=Tb427_100045000.1	Tb427_100045000	Tb427_100045000	Tb927.10.4060:mRNA-p1	Tb927.10.4060:mRNA-p1	Ankyrin repeats (3 copies)/Ankyrin repeat, putative	12	12	12	38.3	39.932	368	28.388	28.3482	28.226	27.7961	27.6025	28.0834	27.4712	27.9505	27.7537	27.5836	27.6703	27.1005	27.5483	27.9267	27.5849	27.9079	27.4668	26.6469	26.9009	27.033	27.0903	27.2658	26.7234		28.388	28.3482	28.226	27.7961	27.6025	28.0834	27.4712	27.9505	27.7537	27.5836	27.6703	27.1005
Tb427_110162000	Tb427_110162000.1	http://tritrypdb.org/tritrypdb/processQuestion.do?questionFullName=GeneQuestions.GeneByLocusTag&questionSubmit=Get+Answer&ds_gene_ids_data=Tb427_110162000.1	Tb427_110162000	Tb427_110162000	Tb927.11.14410:mRNA-p1	Tb927.11.14410:mRNA-p1;Tb927.10.3470:mRNA-p1;Tb927.9.13100:mRNA-p1;Tb927.7.1610:mRNA-p1;Tb927.9.7700:mRNA-p1;Tb927.11.4910:mRNA-p1;Tb927.3.2710:mRNA-p1	Ankyrin repeats (3 copies)/Ankyrin repeat/Ankyrin repeats (many copies), putative	4	4	4	8.3	59.556	527						24.7582				24.7576					24.8966						24.8652	24.681		25.5625	24.5988	24.6939	24.502	24.4986	24.8563	24.7582	24.6073	24.9818	24.6657	24.7576	24.2306	24.7488
Tb427_040013600	Tb427_040013600.1	http://tritrypdb.org/tritrypdb/processQuestion.do?questionFullName=GeneQuestions.GeneByLocusTag&questionSubmit=Get+Answer&ds_gene_ids_data=Tb427_040013600.1	Tb427_040013600	Tb427_040013600	Tb927.4.1170:mRNA-p1	Tb927.4.1170:mRNA-p1;Tb11.v5.0430.1-p1;Tb927.6.4610:mRNA-p1;Tb927.11.4910:mRNA-p1;Tb927.9.13100:mRNA-p1;Tb927.10.15730:mRNA-p1;Tb927.10.4720:mRNA-p1;Tb927.11.14410:mRNA-p1;Tb927.10.15430:mRNA-p1;Tb927.7.1610:mRNA-p1;Tb927.10.3470:mRNA-p1;Tb927.9.15400:mRNA-p1	Ankyrin repeats (3 copies)/Ankyrin repeat/Ankyrin repeats (many copies), putative	15	15	15	47.2	36.655	339	29.0113	28.7732	28.7418	28.6394	28.8383	28.4763	28.5432	28.6487	28.4964	28.6961	28.5172	28.2655	28.6712	28.3755	28.4497	28.7437	28.3655	28.0622	28.3278	28.4615	27.9115	27.7705	27.9322	27.9848	29.0113	28.7732	28.7418	28.6394	28.8383	28.4763	28.5432	28.6487	28.4964	28.6961	28.5172	28.2655
Tb427_100137100	Tb427_100137100.1	http://tritrypdb.org/tritrypdb/processQuestion.do?questionFullName=GeneQuestions.GeneByLocusTag&questionSubmit=Get+Answer&ds_gene_ids_data=Tb427_100137100.1	Tb427_100137100	Tb427_100137100	Tb927.10.12990:mRNA-p1	Tb927.10.12990:mRNA-p1;Tb927.9.15400:mRNA-p1;Tb927.11.8100:mRNA-p1;Tb927.9.13100:mRNA-p1;Tb927.10.3470:mRNA-p1	Ankyrin repeats (3 copies)/Ankyrin repeat/Ankyrin repeats (many copies), putative	8	8	8	34.1	32.826	296	27.7259	27.8402	27.7831	28.5048	27.9299	27.4475	27.6158	28.1331	27.9131	27.9383	28.0322	28.2808	28.0755	28.0148	27.5063	28.0754	27.951	27.4528	27.893	27.9703	27.9273	27.2124	27.6128	28.1062	27.7259	27.8402	27.7831	28.5048	27.9299	27.4475	27.6158	28.1331	27.9131	27.9383	28.0322	28.2808
Tb427_110054200	Tb427_110054200.1	http://tritrypdb.org/tritrypdb/processQuestion.do?questionFullName=GeneQuestions.GeneByLocusTag&questionSubmit=Get+Answer&ds_gene_ids_data=Tb427_110054200.1	Tb427_110054200	Tb427_110054200	Tb927.11.4910:mRNA-p1	Tb927.11.4910:mRNA-p1;Tb927.5.2940:mRNA-p1;Tb927.10.4450:mRNA-p1;Tb10.v4.0035:mRNA-p1;Tb11.v5.0757.1-p1;Tb927.6.4610:mRNA-p1;Tb927.6.4000:mRNA-p1;Tb927.9.7700:mRNA-p1;Tb927.10.6570:mRNA-p1;Tb11.v5.0809.1-p1;Tb927.11.8100:mRNA-p1;Tb927.2.5150:mRNA-p1;Tb927.10.3470:mRNA-p1;Tb927.4.2220:mRNA-p1;Tb927.4.1170:mRNA-p1;Tb927.9.13100:mRNA-p1;Tb927.10.4900:mRNA-p1;Tb927.2.2880:mRNA-p1;Tb927.11.8240:mRNA-p…	Ankyrin repeats (3 copies)/Ankyrin repeat/Ankyrin repeats (many copies), putative	19	19	19	57.1	43.647	392	31.6697	31.9569	31.7805	31.5113	31.3887	31.5651	31.5629	31.4827	31.2818	31.3278	31.3477	31.4396	31.0592	31.3798	30.9997	31.2532	31.0152	30.6538	30.6801	31.0821	30.6196	30.2692	30.6407	30.2979	31.6697	31.9569	31.7805	31.5113	31.3887	31.5651	31.5629	31.4827	31.2818	31.3278	31.3477	31.4396
Tb427_100039300	Tb427_100039300.1	http://tritrypdb.org/tritrypdb/processQuestion.do?questionFullName=GeneQuestions.GeneByLocusTag&questionSubmit=Get+Answer&ds_gene_ids_data=Tb427_100039300.1	Tb427_100039300	Tb427_100039300	Tb927.10.3470:mRNA-p1	Tb927.10.3470:mRNA-p1;Tb927.9.7700:mRNA-p1;Tb927.11.4910:mRNA-p1;Tb927.11.14410:mRNA-p1;Tb927.9.13100:mRNA-p1;Tb927.10.12990:mRNA-p1;Tb927.6.4610:mRNA-p1;Tb927.7.1610:mRNA-p1;Tb927.4.1170:mRNA-p1	Ankyrin repeats (3 copies)/Ankyrin repeat/Ankyrin repeats (many copies), putative	6	6	6	8.9	89.957	808	26.0182	24.9642	25.9914		25.333	25.4068	25.4612		25.2643				25.0461	24.8329	25.3182		24.9198	25.052		24.7025					26.0182	24.9642	25.9914	25.3322	25.333	25.4068	25.4612	24.6246	25.2643	24.215	24.3212	24.3476
Tb427_030008500	Tb427_030008500.1	http://tritrypdb.org/tritrypdb/processQuestion.do?questionFullName=GeneQuestions.GeneByLocusTag&questionSubmit=Get+Answer&ds_gene_ids_data=Tb427_030008500.1	Tb427_030008500	Tb427_030008500	Tb927.3.880:mRNA-p1	Tb927.3.880:mRNA-p1;Tb927.7.1610:mRNA-p1;Tb927.9.13100:mRNA-p1;Tb927.3.2710:mRNA-p1	Ankyrin repeats (3 copies)/Ankyrin repeat/Ankyrin repeats (many copies), putative	10	10	10	52.9	27.133	244	28.9526	30.2713	28.0055	27.7835	28.4	29.1422	27.6344	27.5533	27.9678	28.3858	28.0601	28.2611	28.1712	28.8357	29.0018	28.5567	28.1218	29.8796	28.4496	27.7758	28.7825	28.4728	27.8218	28.1323	28.9526	30.2713	28.0055	27.7835	28.4	29.1422	27.6344	27.5533	27.9678	28.3858	28.0601	28.2611
Tb427_060051300	Tb427_060051300.1	http://tritrypdb.org/tritrypdb/processQuestion.do?questionFullName=GeneQuestions.GeneByLocusTag&questionSubmit=Get+Answer&ds_gene_ids_data=Tb427_060051300.1	Tb427_060051300	Tb427_060051300	Tb927.6.4610:mRNA-p1	Tb927.6.4610:mRNA-p1;Tb927.11.4910:mRNA-p1;Tb927.9.15400:mRNA-p1;Tb927.4.1170:mRNA-p1;Tb927.9.13100:mRNA-p1;Tb927.9.7700:mRNA-p1;Tb927.7.1610:mRNA-p1;Tb927.10.4720:mRNA-p1;Tb927.10.3470:mRNA-p1;Tb927.10.15730:mRNA-p1	Ankyrin repeats (3 copies)/Ankyrin repeats (many copies)/Ankyrin repeat, putative	12	12	12	32.2	46.439	413	28.092	28.208	27.9615	27.8296	28.4539	28.129	28.3914	28.1956	28.3198	28.4345	28.214	27.8839	28.5757	28.3295	28.283	28.3006	28.7956	28.258	28.3953	28.1129	28.285	28.2941	28.3906	28.0977	28.092	28.208	27.9615	27.8296	28.4539	28.129	28.3914	28.1956	28.3198	28.4345	28.214	27.8839
Tb427_090089700	Tb427_090089700.1	http://tritrypdb.org/tritrypdb/processQuestion.do?questionFullName=GeneQuestions.GeneByLocusTag&questionSubmit=Get+Answer&ds_gene_ids_data=Tb427_090089700.1	Tb427_090089700	Tb427_090089700	Tb927.9.15400:mRNA-p1	Tb927.9.15400:mRNA-p1;Tb927.9.13100:mRNA-p1;Tb927.3.2710:mRNA-p1;Tb927.8.5760:mRNA-p1;Tb927.9.7700:mRNA-p1;Tb927.4.1170:mRNA-p1;Tb927.7.1610:mRNA-p1	Ankyrin repeats (3 copies)/Ankyrin repeats (many copies)/Ankyrin repeat, putative	12	12	12	4.8	334.26	3048			25.9442			25.9457	24.8915		26.1328	26.6296	26.103	26.306				26.2028		26.0065	26.1015		26.5744	27.0257	26.4007	26.2791	24.1395	24.7754	25.9442	24.7378	24.4067	25.9457	24.8915	24.8735	26.1328	26.6296	26.103	26.306
Tb427_090078000	Tb427_090078000.1	http://tritrypdb.org/tritrypdb/processQuestion.do?questionFullName=GeneQuestions.GeneByLocusTag&questionSubmit=Get+Answer&ds_gene_ids_data=Tb427_090078000.1	Tb427_090078000	Tb427_090078000	Tb927.9.13100:mRNA-p1	Tb927.9.13100:mRNA-p1;Tb927.6.4610:mRNA-p1;Tb927.11.4910:mRNA-p1;Tb927.3.880:mRNA-p1;Tb927.7.1610:mRNA-p1;Tb927.10.3470:mRNA-p1;Tb927.9.7700:mRNA-p1;Tb927.7.7250:mRNA-p1;Tb927.4.1170:mRNA-p1;Tb927.11.14410:mRNA-p1;Tb927.9.15400:mRNA-p1;Tb927.10.12990:mRNA-p1;Tb927.3.2710:mRNA-p1;Tb927.8.5760:mRNA-p1;Tb927.11.8100:mRNA-p1	Ankyrin repeats (3 copies)/Ankyrin repeats (many copies)/Ankyrin repeat, putative	8	8	8	53.1	19.456	179	27.1816	27.3044	26.767	28.0476	27.5743	27.6915	27.4201	26.8583	26.8578	27.2988	27.506	27.1058	26.5973	27.4337	26.7899	27.259	26.6701	26.6667	27.2513	27.5228	27.0045	27.1091	26.9321	27.3483	27.1816	27.3044	26.767	28.0476	27.5743	27.6915	27.4201	26.8583	26.8578	27.2988	27.506	27.1058
Tb427_070020400	Tb427_070020400.1	http://tritrypdb.org/tritrypdb/processQuestion.do?questionFullName=GeneQuestions.GeneByLocusTag&questionSubmit=Get+Answer&ds_gene_ids_data=Tb427_070020400.1	Tb427_070020400	Tb427_070020400	Tb927.7.1610:mRNA-p1	Tb927.7.1610:mRNA-p1;Tb927.3.2710:mRNA-p1;Tb927.8.1020:mRNA-p1;Tb927.3.880:mRNA-p1;Tb927.9.7700:mRNA-p1;Tb927.9.13100:mRNA-p1;Tb927.10.15730:mRNA-p1;Tb927.11.4910:mRNA-p1;Tb927.11.14410:mRNA-p1;Tb927.7.7250:mRNA-p1;Tb927.6.4610:mRNA-p1;Tb927.10.4720:mRNA-p1;Tb927.10.3470:mRNA-p1;Tb927.4.1170:mRNA-p1	Ankyrin repeats (3 copies)/Ankyrin repeats (many copies)/Ankyrin repeat/6-phosphofructo-2-kinase/Histidine phosphatase superfamily (branch 1), putative	12	12	12	20.8	72.906	653	26.116		25.6573	26.4013	26.3935	26.4523		26.4043	26.5595	26.3998	25.7912	26.6753		26.5021	26.4327	26.3827	26.3387	26.7303	26.3113	26.2531		26.945	26.7184	26.3433	26.116	24.6608	25.6573	26.4013	26.3935	26.4523	24.9053	26.4043	26.5595	26.3998	25.7912	26.6753
Tb427_030054100	Tb427_030054100.1	http://tritrypdb.org/tritrypdb/processQuestion.do?questionFullName=GeneQuestions.GeneByLocusTag&questionSubmit=Get+Answer&ds_gene_ids_data=Tb427_030054100.1	Tb427_030054100	Tb427_030054100	Tb927.3.5060:mRNA-p1	Tb927.3.5060:mRNA-p1;Tb927.11.4910:mRNA-p1	Ankyrin repeats (many copies)/Ankyrin repeats (3 copies)/Ankyrin repeat, putative	23	23	23	70	39.154	347	30.9775	31.0847	30.9762	30.901	31.3403	31.02	30.9808	31.0513	30.9717	30.9631	31.0293	30.8245	31.1773	31.1627	31.0696	30.9868	31.469	30.3067	30.9712	31.0871	31.0704	30.6275	31.2312	31.386	30.9775	31.0847	30.9762	30.901	31.3403	31.02	30.9808	31.0513	30.9717	30.9631	31.0293	30.8245
Tb427_070080200	Tb427_070080200.1	http://tritrypdb.org/tritrypdb/processQuestion.do?questionFullName=GeneQuestions.GeneByLocusTag&questionSubmit=Get+Answer&ds_gene_ids_data=Tb427_070080200.1	Tb427_070080200	Tb427_070080200	Tb927.7.7250:mRNA-p1	Tb927.7.7250:mRNA-p1;Tb927.9.13100:mRNA-p1;Tb927.7.1610:mRNA-p1;Tb927.3.2710:mRNA-p1	Ankyrin repeats (many copies)/Ankyrin repeats (3 copies)/Ankyrin repeat, putative	29	29	29	29.5	142.34	1317	29.1848	29.1909	28.6567	29.0824	29.0513	29.143	29.058	28.8688	29.1987	29.0857	28.6511	28.9173	29.2425	29.1794	28.9869	29.1119	29.2958	29.4332	29.2047	29.0455	29.1134	29.4502	29.2456	29.1484	29.1848	29.1909	28.6567	29.0824	29.0513	29.143	29.058	28.8688	29.1987	29.0857	28.6511	28.9173
Tb427_030027700	Tb427_030027700.1	http://tritrypdb.org/tritrypdb/processQuestion.do?questionFullName=GeneQuestions.GeneByLocusTag&questionSubmit=Get+Answer&ds_gene_ids_data=Tb427_030027700.1	Tb427_030027700	Tb427_030027700	Tb927.3.2710:mRNA-p1	Tb927.3.2710:mRNA-p1;Tb927.7.1610:mRNA-p1;Tb927.8.1020:mRNA-p1;Tb927.9.7700:mRNA-p1;Tb927.9.15400:mRNA-p1;Tb927.9.13100:mRNA-p1;Tb927.7.7250:mRNA-p1;Tb927.3.880:mRNA-p1;Tb927.11.14410:mRNA-p1;Tb927.11.4910:mRNA-p1	Ankyrin repeats (many copies)/Ankyrin repeats (3 copies)/Ankyrin repeat/6-phosphofructo-2-kinase, putative	15	15	15	18.4	110.9	1023	27.7457	28.2384	27.7932	28.0726	28.163	28.3338	28.3863	28.4292	28.4167	28.1712	28.2985	28.59	28.9702	28.6893	28.5003	29.1179	28.6796	28.4122	29.1034	28.8324	29.024	28.8743	28.9665	28.7309	27.7457	28.2384	27.7932	28.0726	28.163	28.3338	28.3863	28.4292	28.4167	28.1712	28.2985	28.59
Tb427_080063000	Tb427_080063000.1	http://tritrypdb.org/tritrypdb/processQuestion.do?questionFullName=GeneQuestions.GeneByLocusTag&questionSubmit=Get+Answer&ds_gene_ids_data=Tb427_080063000.1	Tb427_080063000	Tb427_080063000	Tb927.8.5760:mRNA-p1	Tb927.8.5760:mRNA-p1;Tb927.9.13100:mRNA-p1;Tb927.6.1810:mRNA-p1;Tb927.9.15400:mRNA-p1;Tb927.3.2710:mRNA-p1	Ankyrin repeats (many copies)/Ankyrin repeats (3 copies)/Ankyrin repeat/Alpha/beta hydrolase family/Serine aminopeptidase, S33, putative	22	22	22	47.7	53.813	478	29.7247	30.2019	29.9265	29.4082	29.2684	29.6392	29.6327	29.0485	29.3581	29.4733	29.4275	29.4767	29.4738	29.7228	29.481	29.7381	29.3986	30.1995	30.2113	29.7453	29.646	30.3873	30.5028	30.0715	29.7247	30.2019	29.9265	29.4082	29.2684	29.6392	29.6327	29.0485	29.3581	29.4733	29.4275	29.4767
Tb427_070016000	Tb427_070016000.1	http://tritrypdb.org/tritrypdb/processQuestion.do?questionFullName=GeneQuestions.GeneByLocusTag&questionSubmit=Get+Answer&ds_gene_ids_data=Tb427_070016000.1	Tb427_070016000	Tb427_070016000	Tb927.7.1200:mRNA-p1	Tb927.7.1200:mRNA-p1	ApaG domain containing protein, putative	16	16	16	40.5	48.838	440	27.604	27.9136	27.8142	27.4514	27.8277	28.1397	27.8948	27.3155	28.2251	28.3306	27.7268	27.74	27.9815	28.3801	28.2206	27.9728	28.1861	28.4167	28.1081	28.1597	28.2909	28.4273	28.192	28.2312	27.604	27.9136	27.8142	27.4514	27.8277	28.1397	27.8948	27.3155	28.2251	28.3306	27.7268	27.74
Tb427_080022400	Tb427_080022400.1	http://tritrypdb.org/tritrypdb/processQuestion.do?questionFullName=GeneQuestions.GeneByLocusTag&questionSubmit=Get+Answer&ds_gene_ids_data=Tb427_080022400.1	Tb427_080022400	Tb427_080022400	Tb927.8.1950:mRNA-p1	Tb927.8.1950:mRNA-p1	ApbE family, putative	18	18	18	28.5	78.778	710	29.7774	29.6211	29.8718	29.9027	29.4672	29.3349	29.4434	29.5113	29.3266	29.2262	29.3364	29.046	29.3005	29.3888	29.3114	29.0822	29.5606	28.3823	29.0255	28.6809	28.9148	28.9414	28.137	28.344	29.7774	29.6211	29.8718	29.9027	29.4672	29.3349	29.4434	29.5113	29.3266	29.2262	29.3364	29.046
Tb427_050014000	Tb427_050014000.1;Tb427_110072300.1	http://tritrypdb.org/tritrypdb/processQuestion.do?questionFullName=GeneQuestions.GeneByLocusTag&questionSubmit=Get+Answer&ds_gene_ids_data=Tb427_050014000.1,Tb427_110072300.1	Tb427_050014000;Tb427_110072300	Tb427_050014000	Tb927.5.930:mRNA-p1;Tb927.11.6730.1-p1	Tb927.5.930:mRNA-p1;Tb927.10.3650:mRNA-p1;Tb11.v5.0613.1-p1;Tb927.5.940:mRNA-p1;Tb927.8.6580:mRNA-p1;Tb927.11.3750:mRNA-p1;Tb927.7.2710:mRNA-p1;Tb927.11.15550:mRNA-p1;Tb927.7.2700:mRNA-p1;Tb927.11.6730.1-p1	ApbE family/Alanine dehydrogenase/PNT, C-terminal domain/Pyridine nucleotide-disulphide oxidoreductase/Glucose inhibited division protein A/FAD dependent oxidoreductase/FAD binding domain/NAD(P)-binding Rossmann-like domain/Oxidoreductase FAD-binding domain/Oxidoreductase NAD-binding domain containi	67	67	40	70.1	123.6	1142	34.7178	34.7729	34.6021	34.6053	34.1331	34.3729	34.2978	34.3619	34.0101	34.1672	33.9652	34.0974	33.9752	33.9201	33.7234	33.8755	33.8041	33.9652	33.726	33.8498	33.7515	33.9362	33.776	33.4303	34.7178	34.7729	34.6021	34.6053	34.1331	34.3729	34.2978	34.3619	34.0101	34.1672	33.9652	34.0974
Tb427_050039200	Tb427_050039200.1	http://tritrypdb.org/tritrypdb/processQuestion.do?questionFullName=GeneQuestions.GeneByLocusTag&questionSubmit=Get+Answer&ds_gene_ids_data=Tb427_050039200.1	Tb427_050039200	Tb427_050039200	Tb927.5.3270:mRNA-p1	Tb927.5.3270:mRNA-p1	Apg6 BARA domain containing protein, putative	7	7	7	10.6	90.601	833	25.5061	26.1872	26.4615		26.6074	26.9974	26.6174		25.7189	25.1201		25.263	26.5862	26.8102				26.1787	26.7662	25.9137		26.3735	26.0864		25.5061	26.1872	26.4615	25.064	26.6074	26.9974	26.6174	24.6808	25.7189	25.1201	24.7688	25.263
Tb427_010013500	Tb427_010013500.1	http://tritrypdb.org/tritrypdb/processQuestion.do?questionFullName=GeneQuestions.GeneByLocusTag&questionSubmit=Get+Answer&ds_gene_ids_data=Tb427_010013500.1	Tb427_010013500	Tb427_010013500	Tb927.1.1700:mRNA-p1	Tb927.1.1700:mRNA-p1	Apoptosis antagonizing transcription factor, putative	14	14	14	33.1	55.199	493	29.1563	29.2963	29.2661	29.1464	28.6775	29.1005	29.1024	29.0095	28.4392	28.9735	28.5395	28.3418	28.4003	28.7483	28.663	28.3976	28.1215	27.9989	27.7899	28.7642	28.338	28.1702	27.7772	28.4979	29.1563	29.2963	29.2661	29.1464	28.6775	29.1005	29.1024	29.0095	28.4392	28.9735	28.5395	28.3418
Tb427_040005500	Tb427_040005500.1	http://tritrypdb.org/tritrypdb/processQuestion.do?questionFullName=GeneQuestions.GeneByLocusTag&questionSubmit=Get+Answer&ds_gene_ids_data=Tb427_040005500.1	Tb427_040005500	Tb427_040005500			ARD/ARD' family, putative	9	9	9	36.4	33.47	280	29.2955	29.6974	29.673	29.6334	29.9931	29.4968	29.784	30.4799	29.9824	29.6163	29.8958	29.8984	30.1647	29.3144	30.057	29.8228	30.4589	29.2762	30.0933	29.3499	29.6508	29.4152	30.0775	29.8657	29.2955	29.6974	29.673	29.6334	29.9931	29.4968	29.784	30.4799	29.9824	29.6163	29.8958	29.8984
Tb427_110020300	Tb427_110020300.1	http://tritrypdb.org/tritrypdb/processQuestion.do?questionFullName=GeneQuestions.GeneByLocusTag&questionSubmit=Get+Answer&ds_gene_ids_data=Tb427_110020300.1	Tb427_110020300	Tb427_110020300			ARD/ARD' family/Eukaryotic protein of unknown function (DUF953), putative	21	21	21	67.1	37.518	331	31.8635	32.1052	32.0098	31.6699	31.9944	32.11	32.2079	31.541	32.1707	32.0991	31.8263	31.7112	32.0022	32.1578	31.8585	31.7336	31.6317	31.3421	31.3339	31.6237	31.4111	31.1333	31.3609	31.1725	31.8635	32.1052	32.0098	31.6699	31.9944	32.11	32.2079	31.541	32.1707	32.0991	31.8263	31.7112
Tb427_080023100	Tb427_080023100.1	http://tritrypdb.org/tritrypdb/processQuestion.do?questionFullName=GeneQuestions.GeneByLocusTag&questionSubmit=Get+Answer&ds_gene_ids_data=Tb427_080023100.1	Tb427_080023100	Tb427_080023100	Tb927.8.2020:mRNA-p1	Tb927.8.2020:mRNA-p1	Arginase family, putative	15	15	15	48.3	36.517	331	28.349	28.2666	28.1501	28.4963	28.0816	28.5574	28.0302	28.9827	29.1047	28.5661	28.8072	28.845	28.7132	28.422	28.7349	29.074	29.0343	28.7374	29.3029	28.9088	28.7469	28.5217	29.3023	29.2996	28.349	28.2666	28.1501	28.4963	28.0816	28.5574	28.0302	28.9827	29.1047	28.5661	28.8072	28.845
Tb427_110024700	Tb427_110024700.1	http://tritrypdb.org/tritrypdb/processQuestion.do?questionFullName=GeneQuestions.GeneByLocusTag&questionSubmit=Get+Answer&ds_gene_ids_data=Tb427_110024700.1	Tb427_110024700	Tb427_110024700	Tb927.11.1990:mRNA-p1	Tb927.11.1990:mRNA-p1	Arginyl tRNA synthetase N terminal domain/tRNA synthetases class I (R)/DALR anticodon binding domain containing protein, putative	60	60	60	82.9	78.404	692	33.3427	33.3046	33.194	33.2695	33.4543	33.4762	33.2507	33.3343	33.3514	33.3455	33.2341	33.3006	33.2056	33.2481	33.1649	33.2302	33.0718	32.6612	32.6928	33.0643	32.6162	32.7362	32.7471	32.6944	33.3427	33.3046	33.194	33.2695	33.4543	33.4762	33.2507	33.3343	33.3514	33.3455	33.2341	33.3006
Tb427_100151500	Tb427_100151500.1	http://tritrypdb.org/tritrypdb/processQuestion.do?questionFullName=GeneQuestions.GeneByLocusTag&questionSubmit=Get+Answer&ds_gene_ids_data=Tb427_100151500.1	Tb427_100151500	Tb427_100151500	Tb927.10.14320:mRNA-p1	Tb927.10.14320:mRNA-p1;Tb927.6.2640:mRNA-p1	Armadillo/beta-catenin-like repeat, putative	36	36	36	40.9	121.74	1133	30.3379	30.287	30.1765	30.1554	30.5003	30.3349	30.1438	30.227	30.413	30.1992	30.1679	30.0732	30.3601	30.2007	30.2502	30.1994	30.0133	30.2784	29.9739	29.919	29.7949	30.1177	29.9764	29.474	30.3379	30.287	30.1765	30.1554	30.5003	30.3349	30.1438	30.227	30.413	30.1992	30.1679	30.0732
Tb427_010020200	Tb427_010020200.1	http://tritrypdb.org/tritrypdb/processQuestion.do?questionFullName=GeneQuestions.GeneByLocusTag&questionSubmit=Get+Answer&ds_gene_ids_data=Tb427_010020200.1	Tb427_010020200	Tb427_010020200	Tb927.1.2670:mRNA-p1	Tb927.1.2670:mRNA-p1;Tb927.6.2640:mRNA-p1	Armadillo/beta-catenin-like repeat/HEAT repeat, putative	28	28	28	71.7	56.126	513	32.1962	31.879	31.7839	31.9332	32.4074	32.0166	32.1318	32.1022	32.3986	31.954	32.0432	32.0127	32.3483	32.2029	32.3005	32.1534	32.376	32.191	32.3162	32.2563	32.3624	32.2587	32.302	32.5053	32.1962	31.879	31.7839	31.9332	32.4074	32.0166	32.1318	32.1022	32.3986	31.954	32.0432	32.0127
Tb427_060031500	Tb427_060031500.1	http://tritrypdb.org/tritrypdb/processQuestion.do?questionFullName=GeneQuestions.GeneByLocusTag&questionSubmit=Get+Answer&ds_gene_ids_data=Tb427_060031500.1	Tb427_060031500	Tb427_060031500	Tb927.6.2640:mRNA-p1	Tb927.6.2640:mRNA-p1;Tb927.1.2670:mRNA-p1;Tb927.10.14320:mRNA-p1	Armadillo/beta-catenin-like repeat/HEAT-like repeat/Atypical Arm repeat, putative	21	21	21	59.1	57.955	533	32.0383	31.9287	32.0197	31.9568	32.0949	32.0063	31.8823	31.9541	31.8846	31.8633	31.5544	31.6059	31.8573	31.5392	31.3912	31.4117	31.5207	31.0571	30.9093	31.1988	30.8724	30.9051	30.7577	30.718	32.0383	31.9287	32.0197	31.9568	32.0949	32.0063	31.8823	31.9541	31.8846	31.8633	31.5544	31.6059
Tb427_080049000	Tb427_080049000.1	http://tritrypdb.org/tritrypdb/processQuestion.do?questionFullName=GeneQuestions.GeneByLocusTag&questionSubmit=Get+Answer&ds_gene_ids_data=Tb427_080049000.1	Tb427_080049000	Tb427_080049000	Tb927.8.4410:mRNA-p1	Tb927.8.4410:mRNA-p1	Arp2/3 complex, 34 kD subunit p34-Arc, putative	6	6	6	17.3	37.992	336	25.27	25.3573	24.8478		24.9085	25.164	24.9695			25.1069	24.8734			25.2186	25.3348			25.2801				24.9053	25.1247		25.27	25.3573	24.8478	24.3685	24.9085	25.164	24.9695	24.0973	24.7766	25.1069	24.8734	24.6704
Tb427_080064300	Tb427_080064300.1	http://tritrypdb.org/tritrypdb/processQuestion.do?questionFullName=GeneQuestions.GeneByLocusTag&questionSubmit=Get+Answer&ds_gene_ids_data=Tb427_080064300.1	Tb427_080064300	Tb427_080064300	Tb927.8.5890:mRNA-p1	Tb927.8.5890:mRNA-p1;Tb927.1.630:mRNA-p1	ASF1 like histone chaperone, putative	7	7	7	37.1	24.766	224	28.4277	28.3703	28.5363	28.8223	28.2445	28.1009	27.9113	28.4082	28.1728	28.0997	27.9291	27.9393	28.0249	28.0634	28.2178	28.126	27.9349	27.7663	28.0806	28.1707	27.1371	27.7234	27.7009	27.5163	28.4277	28.3703	28.5363	28.8223	28.2445	28.1009	27.9113	28.4082	28.1728	28.0997	27.9291	27.9393
Tb427_010006000	Tb427_010006000.1	http://tritrypdb.org/tritrypdb/processQuestion.do?questionFullName=GeneQuestions.GeneByLocusTag&questionSubmit=Get+Answer&ds_gene_ids_data=Tb427_010006000.1	Tb427_010006000	Tb427_010006000	Tb927.1.630:mRNA-p1	Tb927.1.630:mRNA-p1;Tb927.8.5890:mRNA-p1	ASF1 like histone chaperone, putative	3	3	3	27.5	19.121	171	25.681	25.6544	25.743	26.0021		25.7837		25.3623	25.7934	26.053	25.4108	25.5184	25.7506		25.5131	25.6523		25.195	25.198				25.2884		25.681	25.6544	25.743	26.0021	24.7207	25.7837	24.5772	25.3623	25.7934	26.053	25.4108	25.5184
Tb427_050042400	Tb427_050042400.1	http://tritrypdb.org/tritrypdb/processQuestion.do?questionFullName=GeneQuestions.GeneByLocusTag&questionSubmit=Get+Answer&ds_gene_ids_data=Tb427_050042400.1	Tb427_050042400	Tb427_050042400	Tb927.5.3590:mRNA-p1	Tb927.5.3590:mRNA-p1	ASCH domain containing protein, putative	4	4	4	9.4	68.173	608	25.5912	26.1585	25.8462		25.6653	25.7126	25.7568			25.6669	25.9001		25.328	25.6643											25.5912	26.1585	25.8462	24.7412	25.6653	25.7126	25.7568	24.5379	24.6891	25.6669	25.9001	24.7466
Tb427_030043500	Tb427_030043500.1	http://tritrypdb.org/tritrypdb/processQuestion.do?questionFullName=GeneQuestions.GeneByLocusTag&questionSubmit=Get+Answer&ds_gene_ids_data=Tb427_030043500.1	Tb427_030043500	Tb427_030043500	Tb927.3.4060:mRNA-p1	Tb927.3.4060:mRNA-p1	Asparagine synthase, putative	8	8	8	14.5	92.431	856	26.6143	26.8522			26.6565	27.1594	26.6816								26.4593							26.5065			26.6143	26.8522	24.5744	25.4502	26.6565	27.1594	26.6816	24.2531	24.446	24.3834	24.0433	24.764
Tb427_050044800	Tb427_050044800.1	http://tritrypdb.org/tritrypdb/processQuestion.do?questionFullName=GeneQuestions.GeneByLocusTag&questionSubmit=Get+Answer&ds_gene_ids_data=Tb427_050044800.1	Tb427_050044800	Tb427_050044800	Tb927.5.3820:mRNA-p1	Tb927.5.3820:mRNA-p1	Aspartate/ornithine carbamoyltransferase, carbamoyl-P binding domain/Aspartate/ornithine carbamoyltransferase, Asp/Orn binding domain containing protein, putative	22	22	22	80.1	35.91	327	31.7864	31.8211	31.7155	31.776	31.8818	31.6542	31.7836	32.0186	31.8945	31.752	31.6655	31.5815	31.6994	31.6918	31.5829	31.7788	31.7906	31.306	31.3316	31.7255	31.5158	31.3117	31.3153	31.6865	31.7864	31.8211	31.7155	31.776	31.8818	31.6542	31.7836	32.0186	31.8945	31.752	31.6655	31.5815
Tb427_070014900	Tb427_070014900.1	http://tritrypdb.org/tritrypdb/processQuestion.do?questionFullName=GeneQuestions.GeneByLocusTag&questionSubmit=Get+Answer&ds_gene_ids_data=Tb427_070014900.1	Tb427_070014900	Tb427_070014900	Tb927.7.1110:mRNA-p1	Tb927.7.1110:mRNA-p1	Aspartate-ammonia ligase, putative	19	19	19	65.2	39.611	351	31.3162	31.7963	31.3583	31.3913	31.4798	31.5602	31.276	31.3385	31.2079	31.2696	31.4299	31.1777	31.3452	31.4193	31.3467	31.1211	31.4322	30.6606	31.2514	31.2327	31.1553	30.98	31.2736	30.9955	31.3162	31.7963	31.3583	31.3913	31.4798	31.5602	31.276	31.3385	31.2079	31.2696	31.4299	31.1777
Tb427_090025600	Tb427_090025600.1	http://tritrypdb.org/tritrypdb/processQuestion.do?questionFullName=GeneQuestions.GeneByLocusTag&questionSubmit=Get+Answer&ds_gene_ids_data=Tb427_090025600.1	Tb427_090025600	Tb427_090025600	Tb927.9.4390:mRNA-p1	Tb927.9.4390:mRNA-p1	Aspartyl protease/Retroviral aspartyl protease/gag-polyprotein putative aspartyl protease/UBA-like domain containing protein, putative	7	7	7	25.7	40.992	378	27.3796	26.7546	27.0297	27.0571	27.0672	26.9749	26.4875	26.7797	26.8404	26.8507	26.1021	26.5195	27.3837	26.5535	26.768	26.5715	26.808	26.0576	26.2359	26.5391	26.3584	26.5577	26.3841	26.0375	27.3796	26.7546	27.0297	27.0571	27.0672	26.9749	26.4875	26.7797	26.8404	26.8507	26.1021	26.5195
Tb427_080050400	Tb427_080050400.1	http://tritrypdb.org/tritrypdb/processQuestion.do?questionFullName=GeneQuestions.GeneByLocusTag&questionSubmit=Get+Answer&ds_gene_ids_data=Tb427_080050400.1	Tb427_080050400	Tb427_080050400	Tb927.8.4540:mRNA-p1	Tb927.8.4540:mRNA-p1	Ataxin 2 SM domain/LsmAD domain containing protein, putative	13	13	13	35.5	59.602	550	30.0439	30.0414	30.1923	29.9913	29.9471	30.1618	30.1221	29.8988	30.2224	30.0598	30.2068	30.0371	29.7801	29.9814	29.974	29.8932	30.1097	29.8511	30.1228	29.9394	30.2333	29.8215	30.2181	29.8797	30.0439	30.0414	30.1923	29.9913	29.9471	30.1618	30.1221	29.8988	30.2224	30.0598	30.2068	30.0371
Tb427_110085600	Tb427_110085600.1	http://tritrypdb.org/tritrypdb/processQuestion.do?questionFullName=GeneQuestions.GeneByLocusTag&questionSubmit=Get+Answer&ds_gene_ids_data=Tb427_110085600.1	Tb427_110085600	Tb427_110085600	Tb927.11.7840:mRNA-p1	Tb927.11.7840:mRNA-p1	ATP cone domain/Ribonucleotide reductase, all-alpha domain/Ribonucleotide reductase, barrel domain containing protein, putative	33	33	33	46.5	94.63	838	31.2384	31.1461	31.007	30.9626	31.3318	31.4058	31.1585	30.9918	31.2401	31.2145	31.099	31.1513	31.2275	31.1629	31.1397	31.3035	31.0335	30.5447	30.7395	30.8914	30.7746	30.693	30.9644	30.9719	31.2384	31.1461	31.007	30.9626	31.3318	31.4058	31.1585	30.9918	31.2401	31.2145	31.099	31.1513
Tb427_050009800	Tb427_050009800.1	http://tritrypdb.org/tritrypdb/processQuestion.do?questionFullName=GeneQuestions.GeneByLocusTag&questionSubmit=Get+Answer&ds_gene_ids_data=Tb427_050009800.1	Tb427_050009800	Tb427_050009800	Tb927.5.550:mRNA-p1	Tb927.5.550:mRNA-p1	ATP synthase (C/AC39) subunit, putative	17	17	17	64.8	42.833	383	29.6174	29.4985	29.4366	28.9328	30.0539	29.4767	29.6323	29.4334	29.814	29.6666	29.5694	29.6529	30.235	29.6781	29.6178	29.8107	29.9464	30.1545	29.914	30.0549	30.2545	29.9153	30.1603	30.5285	29.6174	29.4985	29.4366	28.9328	30.0539	29.4767	29.6323	29.4334	29.814	29.6666	29.5694	29.6529
Tb427_110102100	Tb427_110102100.1	http://tritrypdb.org/tritrypdb/processQuestion.do?questionFullName=GeneQuestions.GeneByLocusTag&questionSubmit=Get+Answer&ds_gene_ids_data=Tb427_110102100.1	Tb427_110102100	Tb427_110102100	Tb927.11.9420:mRNA-p1	Tb927.11.9420:mRNA-p1	ATP synthase (E/31 kDa) subunit, putative	11	11	11	55.1	24.788	216	30.5607	30.4526	30.1042	30.4173	31.0812	30.684	30.5025	31.0049	30.9753	30.6834	30.9372	30.9154	31.1341	30.9061	30.9316	31.0402	31.0884	31.005	31.1664	30.9573	30.8771	31.1577	31.1447	31.3692	30.5607	30.4526	30.1042	30.4173	31.0812	30.684	30.5025	31.0049	30.9753	30.6834	30.9372	30.9154
Tb427_110133400	Tb427_110133400.1	http://tritrypdb.org/tritrypdb/processQuestion.do?questionFullName=GeneQuestions.GeneByLocusTag&questionSubmit=Get+Answer&ds_gene_ids_data=Tb427_110133400.1	Tb427_110133400	Tb427_110133400	Tb927.11.11690:mRNA-p1	Tb927.11.11690:mRNA-p1;Tb927.4.1080:mRNA-p1;Tb927.3.1380:mRNA-p1;Tb927.7.7420:mRNA-p1;Tb927.7.7430:mRNA-p1	ATP synthase alpha/beta family, beta-barrel domain/ATP synthase alpha/beta family, nucleotide-binding domain containing protein, putative	28	28	28	76.2	55.619	495	31.9506	31.9623	31.7681	31.6467	32.0711	31.9522	31.8392	31.9057	32.0806	32.0427	32.021	32.0833	32.1165	32.0782	31.8918	32.0797	32.0101	32.0017	32.093	32.2241	32.1327	32.0857	32.0187	32.4578	31.9506	31.9623	31.7681	31.6467	32.0711	31.9522	31.8392	31.9057	32.0806	32.0427	32.021	32.0833
Tb427_030013500	Tb427_030013500.1	http://tritrypdb.org/tritrypdb/processQuestion.do?questionFullName=GeneQuestions.GeneByLocusTag&questionSubmit=Get+Answer&ds_gene_ids_data=Tb427_030013500.1	Tb427_030013500	Tb427_030013500	Tb927.3.1380:mRNA-p1	Tb927.3.1380:mRNA-p1;Tb927.4.1080:mRNA-p1;Tb927.11.11690:mRNA-p1;Tb927.7.7420:mRNA-p1;Tb927.7.7430:mRNA-p1	ATP synthase alpha/beta family, beta-barrel domain/ATP synthase alpha/beta family, nucleotide-binding domain containing protein, putative	31	31	31	75.5	55.775	519	35.358	35.4289	35.2508	35.3288	35.4406	35.2866	35.2059	35.5331	35.1625	35.2856	35.1295	34.9957	35.3922	35.326	35.2695	35.1449	35.1876	35.2296	35.1076	35.345	35.1582	35.2477	35.2162	35.4574	35.358	35.4289	35.2508	35.3288	35.4406	35.2866	35.2059	35.5331	35.1625	35.2856	35.1295	34.9957
Tb427_040012700	Tb427_040012700.1	http://tritrypdb.org/tritrypdb/processQuestion.do?questionFullName=GeneQuestions.GeneByLocusTag&questionSubmit=Get+Answer&ds_gene_ids_data=Tb427_040012700.1	Tb427_040012700	Tb427_040012700	Tb927.4.1080:mRNA-p1	Tb927.4.1080:mRNA-p1;Tb927.11.11690:mRNA-p1;Tb927.3.1380:mRNA-p1;Tb927.7.7420:mRNA-p1;Tb927.7.7430:mRNA-p1	ATP synthase alpha/beta family, beta-barrel domain/ATPsynthase alpha/beta subunit N-term extension/ATP synthase alpha/beta family, nucleotide-binding domain containing protein, putative	37	37	37	66.4	67.749	610	31.8894	31.9445	31.5937	31.5886	32.1368	32.1369	32.0642	32.0899	32.1288	32.1932	32.3139	32.1935	32.2418	32.4227	32.1676	32.3559	32.4061	32.2778	31.9643	32.5759	32.3406	32.3939	32.1866	32.6436	31.8894	31.9445	31.5937	31.5886	32.1368	32.1369	32.0642	32.0899	32.1288	32.1932	32.3139	32.1935
Tb427_070081900	Tb427_070081900.1;Tb427_070081800.1	http://tritrypdb.org/tritrypdb/processQuestion.do?questionFullName=GeneQuestions.GeneByLocusTag&questionSubmit=Get+Answer&ds_gene_ids_data=Tb427_070081900.1,Tb427_070081800.1	Tb427_070081900;Tb427_070081800	Tb427_070081900	Tb927.7.7420:mRNA-p1	Tb927.7.7420:mRNA-p1;Tb927.7.7430:mRNA-p1;Tb927.11.11690:mRNA-p1;Tb927.4.1080:mRNA-p1;Tb927.3.1380:mRNA-p1	ATP synthase alpha/beta family, nucleotide-binding domain/ATP synthase alpha/beta chain, C terminal domain containing protein, putative	42	42	42	73.3	63.502	584	35.2896	35.4626	35.1655	35.1727	35.2198	35.3988	35.2695	35.2677	35.2145	35.3092	35.1032	35.1111	35.0321	35.4018	35.1628	35.3267	35.2066	35.4671	35.37	35.4503	35.2887	35.4789	35.3682	35.4234	35.2896	35.4626	35.1655	35.1727	35.2198	35.3988	35.2695	35.2677	35.2145	35.3092	35.1032	35.1111
Tb427_100087100	Tb427_100087100.1	http://tritrypdb.org/tritrypdb/processQuestion.do?questionFullName=GeneQuestions.GeneByLocusTag&questionSubmit=Get+Answer&ds_gene_ids_data=Tb427_100087100.1	Tb427_100087100	Tb427_100087100	Tb927.10.8030:mRNA-p1	Tb927.10.8030:mRNA-p1	ATP synthase delta (OSCP) subunit, putative	20	20	20	53.3	28.834	255	32.3491	32.3584	32.377	32.4325	32.6132	32.2711	32.5049	32.5678	32.5081	32.3785	32.6219	32.4394	32.543	32.4742	32.4882	32.4855	32.3681	32.6292	32.7739	32.8771	32.5681	32.5637	32.8274	32.7399	32.3491	32.3584	32.377	32.4325	32.6132	32.2711	32.5049	32.5678	32.5081	32.3785	32.6219	32.4394
Tb427_110031700	Tb427_110031700.1	http://tritrypdb.org/tritrypdb/processQuestion.do?questionFullName=GeneQuestions.GeneByLocusTag&questionSubmit=Get+Answer&ds_gene_ids_data=Tb427_110031700.1	Tb427_110031700	Tb427_110031700	Tb927.11.2680:mRNA-p1	Tb927.11.2680:mRNA-p1	ATP synthase regulation protein NCA2, putative	5	5	5	8.3	79.898	698									25.9966				25.8083	25.9314			25.858	26.1517					25.4818	26.0335	24.5885	24.4835	24.6487	25.3998	24.4142	24.1326	24.6342	24.5945	25.9966	24.9982	24.6301	24.6891
Tb427_060055500	Tb427_060055500.1	http://tritrypdb.org/tritrypdb/processQuestion.do?questionFullName=GeneQuestions.GeneByLocusTag&questionSubmit=Get+Answer&ds_gene_ids_data=Tb427_060055500.1	Tb427_060055500	Tb427_060055500	Tb927.6.5050:mRNA-p1	Tb927.6.5050:mRNA-p1;Tb927.8.2100:mRNA-p1;Tb927.11.7480.1:mRNA-p1;Tb927.11.7480.2:mRNA-p1;Tb927.10.200:mRNA-p1	ATP synthase subunit C, putative	2	2	2	10.3	23.03	224				27.6665											26.664							27.4433		27.8474	24.3971	24.7855	24.739	27.6665	24.456	24.3655	24.1881	24.4872	24.3575	24.6048	24.653	25.0186
Tb427_100042200	Tb427_100042200.1	http://tritrypdb.org/tritrypdb/processQuestion.do?questionFullName=GeneQuestions.GeneByLocusTag&questionSubmit=Get+Answer&ds_gene_ids_data=Tb427_100042200.1	Tb427_100042200	Tb427_100042200	Tb927.10.3760:mRNA-p1	Tb927.10.3760:mRNA-p1	ATP synthase subunit D, putative	16	16	16	58	31.241	283	29.0343	29.158	28.9493	28.9982	29.5152	29.2572	29.3852	29.3152	29.7151	29.4042	29.6177	29.5405	29.5355	29.5501	29.5514	29.7931	29.5168	29.5155	29.6979	29.5191	29.5342	29.5858	29.7121	29.5228	29.0343	29.158	28.9493	28.9982	29.5152	29.2572	29.3852	29.3152	29.7151	29.4042	29.6177	29.5405
Tb427_060054900	Tb427_060054900.1	http://tritrypdb.org/tritrypdb/processQuestion.do?questionFullName=GeneQuestions.GeneByLocusTag&questionSubmit=Get+Answer&ds_gene_ids_data=Tb427_060054900.1	Tb427_060054900	Tb427_060054900	Tb927.6.4990:mRNA-p1	Tb927.6.4990:mRNA-p1	ATP synthase, Delta/Epsilon chain, beta-sandwich domain containing protein, putative	12	12	12	74.2	20.147	182	32.004	32.1336	31.8686	32.1187	31.9889	32.0221	31.9794	32.0528	32.0343	32.1369	32.199	32.2052	32.0306	32.2089	32.2112	32.0514	32.0734	32.3665	32.176	32.3818	32.154	32.0003	32.1025	32.1971	32.004	32.1336	31.8686	32.1187	31.9889	32.0221	31.9794	32.0528	32.0343	32.1369	32.199	32.2052
Tb427_100005200	Tb427_100005200.1	http://tritrypdb.org/tritrypdb/processQuestion.do?questionFullName=GeneQuestions.GeneByLocusTag&questionSubmit=Get+Answer&ds_gene_ids_data=Tb427_100005200.1	Tb427_100005200	Tb427_100005200	Tb927.10.180:mRNA-p1	Tb927.10.180:mRNA-p1	ATP synthase, putative	24	24	24	84.3	34.428	305	33.3998	33.4775	33.5359	33.4188	33.4511	33.4892	33.6102	33.7866	33.4126	33.563	33.5478	33.4309	33.3354	33.576	33.604	33.5316	33.5943	33.6728	33.5987	33.5856	33.6369	33.5952	33.6742	33.6861	33.3998	33.4775	33.5359	33.4188	33.4511	33.4892	33.6102	33.7866	33.4126	33.563	33.5478	33.4309
Tb427_090034800	Tb427_090034800.1	http://tritrypdb.org/tritrypdb/processQuestion.do?questionFullName=GeneQuestions.GeneByLocusTag&questionSubmit=Get+Answer&ds_gene_ids_data=Tb427_090034800.1	Tb427_090034800	Tb427_090034800	Tb927.9.6290:mRNA-p1	Tb927.9.6290:mRNA-p1;Tb927.9.6250:mRNA-p1;Tb927.9.6210:mRNA-p1	ATP:guanido phosphotransferase, N-terminal domain/ATP:guanido phosphotransferase, C-terminal catalytic domain containing protein, putative	42	42	8	74.4	40.199	356	35.6389	35.7753	35.645	35.5125	35.7552	35.5381	35.6359	35.8849	35.6097	35.6431	35.6383	35.6087	35.8232	35.5815	35.5846	35.5437	35.9395	35.6424	35.8449	35.9903	35.7888	35.7015	35.885	35.5913	35.6389	35.7753	35.645	35.5125	35.7552	35.5381	35.6359	35.8849	35.6097	35.6431	35.6383	35.6087
Tb427_090088800	Tb427_090088800.1	http://tritrypdb.org/tritrypdb/processQuestion.do?questionFullName=GeneQuestions.GeneByLocusTag&questionSubmit=Get+Answer&ds_gene_ids_data=Tb427_090088800.1	Tb427_090088800	Tb427_090088800	Tb927.9.15240:mRNA-p1	Tb927.9.15240:mRNA-p1	ATP11 protein, putative	7	7	7	40.3	28.719	248	28.2609	28.2546	28.3052	28.1143	27.9347	27.9363	27.5776	27.5859	28.1902	27.8401	27.909	27.7478	27.7023	27.8787	27.6471	27.8798	27.3454	27.2773	27.5841	27.8179	27.1201	27.2291	27.4303	27.1901	28.2609	28.2546	28.3052	28.1143	27.9347	27.9363	27.5776	27.5859	28.1902	27.8401	27.909	27.7478
Tb427_100146600	Tb427_100146600.1	http://tritrypdb.org/tritrypdb/processQuestion.do?questionFullName=GeneQuestions.GeneByLocusTag&questionSubmit=Get+Answer&ds_gene_ids_data=Tb427_100146600.1	Tb427_100146600	Tb427_100146600	Tb927.10.13850:mRNA-p1	Tb927.10.13850:mRNA-p1	ATP12 chaperone protein, putative	11	11	11	39.5	43.087	380	29.0761	28.6506	28.6658	28.5849	28.7829	28.8858	28.7949	28.9835	28.9589	28.9289	28.7572	28.9917	29.2129	28.8807	29.0074	29.009	29.0071	29.047	29.1004	29.0882	28.7992	28.8991	28.8511	29.1241	29.0761	28.6506	28.6658	28.5849	28.7829	28.8858	28.7949	28.9835	28.9589	28.9289	28.7572	28.9917
Tb427_070034700	Tb427_070034700.1	http://tritrypdb.org/tritrypdb/processQuestion.do?questionFullName=GeneQuestions.GeneByLocusTag&questionSubmit=Get+Answer&ds_gene_ids_data=Tb427_070034700.1	Tb427_070034700	Tb427_070034700	Tb927.7.2950:mRNA-p1	Tb927.7.2950:mRNA-p1;Tb927.11.11350:mRNA-p1;Tb927.6.2930:mRNA-p1;Tb927.10.2760:mRNA-p1;Tb927.8.3580:mRNA-p1;Tb927.10.3520:mRNA-p1;Tb927.10.9420:mRNA-p1;Tb927.10.9740:mRNA-p1;Tb927.7.2500:mRNA-p1;Tb927.11.1660:mRNA-p1;Tb927.6.1090:mRNA-p1;Tb927.11.6350:mRNA-p1;Tb927.11.960:mRNA-p1;Tb927.4.4210:mRNA-p1;Tb927.11.14730:mRNA-p1;Tb927.6.3790:mRNA-p1;Tb927.10.5770:mRNA-p1;Tb927.10.7620:mRNA-p1;Tb927.1.3…	ATPase family associated with various cellular activities (AAA), putative	18	18	18	30	73.967	670	28.3443	28.2312	27.4659	27.4257	28.3621	28.2044	28.0287	27.6187	28.2259	28.0994	27.728	27.7621	28.553	28.5423	28.0394	28.0146	28.3198	28.858	28.2289	28.4315	28.326	28.8855	28.5321	28.6062	28.3443	28.2312	27.4659	27.4257	28.3621	28.2044	28.0287	27.6187	28.2259	28.0994	27.728	27.7621
Tb427_110129700	Tb427_110129700.1	http://tritrypdb.org/tritrypdb/processQuestion.do?questionFullName=GeneQuestions.GeneByLocusTag&questionSubmit=Get+Answer&ds_gene_ids_data=Tb427_110129700.1	Tb427_110129700	Tb427_110129700	Tb927.11.11350:mRNA-p1	Tb927.11.11350:mRNA-p1;Tb927.7.2950:mRNA-p1;Tb927.6.2930:mRNA-p1;Tb927.10.2760:mRNA-p1;Tb927.4.1250:mRNA-p1;Tb927.10.5770:mRNA-p1;Tb927.10.13510:mRNA-p1;Tb927.8.3580:mRNA-p1;Tb927.10.3520:mRNA-p1;Tb927.11.1660:mRNA-p1;Tb927.6.3790:mRNA-p1;Tb927.10.9740:mRNA-p1;Tb927.11.960:mRNA-p1;Tb927.11.14730:mRNA-p1;Tb927.10.16150:mRNA-p1;Tb11.v5.0397.1-p1;Tb927.4.3300:mRNA-p1	ATPase family associated with various cellular activities (AAA), putative	6	6	6	12.6	62.874	563		25.6609	25.3517			26.3486	25.9334			26.0744	25.622			26.5215		25.5837	25.8242			25.6223	25.9273	26.2319	25.8278		24.5412	25.6609	25.3517	24.8245	24.4677	26.3486	25.9334	24.3656	24.7026	26.0744	25.622	24.228
Tb427_110038700	Tb427_110038700.1	http://tritrypdb.org/tritrypdb/processQuestion.do?questionFullName=GeneQuestions.GeneByLocusTag&questionSubmit=Get+Answer&ds_gene_ids_data=Tb427_110038700.1	Tb427_110038700	Tb427_110038700	Tb927.11.3360:mRNA-p1	Tb927.11.3360:mRNA-p1;Tb927.3.1440:mRNA-p1;Tb927.5.1870:mRNA-p1;Tb927.11.8350:mRNA-p1;Tb927.10.1210:mRNA-p1;Tb927.11.3870:mRNA-p1;Tb927.3.3280:mRNA-p1;Tb927.6.1090:mRNA-p1;Tb11.v5.0486.1-p1;Tb927.7.2550:mRNA-p1;Tb927.11.960:mRNA-p1;Tb927.11.1660:mRNA-p1;Tb927.10.9740:mRNA-p1;Tb927.10.13510:mRNA-p1;Tb927.10.16150:mRNA-p1;Tb11.v5.0397.1-p1;Tb927.6.3790:mRNA-p1;Tb927.11.3740:mRNA-p1;Tb927.11.8730:mR…	ATPase family associated with various cellular activities (AAA), putative	29	29	29	41	102.84	909	30.0718	30.0493	30.0962	30.3272	30.0979	29.9993	30.1736	30.3145	30.0338	30.0976	30.0803	30.085	30.0133	30.1404	30.3259	30.4308	30.2797	30.4213	30.4691	30.3019	30.4519	30.5692	30.4953	30.5063	30.0718	30.0493	30.0962	30.3272	30.0979	29.9993	30.1736	30.3145	30.0338	30.0976	30.0803	30.085
Tb427_010023200	Tb427_010023200.1	http://tritrypdb.org/tritrypdb/processQuestion.do?questionFullName=GeneQuestions.GeneByLocusTag&questionSubmit=Get+Answer&ds_gene_ids_data=Tb427_010023200.1	Tb427_010023200	Tb427_010023200	Tb927.1.3230:mRNA-p1	Tb927.1.3230:mRNA-p1;Tb927.5.3920:mRNA-p1;Tb927.11.1660:mRNA-p1;Tb927.10.5770:mRNA-p1;Tb927.6.3790:mRNA-p1;Tb927.4.1250:mRNA-p1;Tb927.11.3740:mRNA-p1;Tb927.10.3520:mRNA-p1;Tb927.5.1870:mRNA-p1;Tb927.6.1090:mRNA-p1;Tb11.v5.0397.1-p1;Tb927.10.16150:mRNA-p1;Tb927.7.2500:mRNA-p1;Tb927.10.9740:mRNA-p1;Tb927.11.3870:mRNA-p1;Tb927.10.1210:mRNA-p1;Tb927.7.2550:mRNA-p1;Tb927.10.7620:mRNA-p1;Tb927.11.6350:…	ATPase family associated with various cellular activities (AAA), putative	7	7	7	12.4	77.11	715	26.235	25.717	25.1987		25.5424	25.493	25.7971		25.5207	25.6128	24.7367	25.3607	25.3193	25.792	25.8359	25.6357		25.5549	25.3677	25.8243	25.1732	25.5197	25.235		26.235	25.717	25.1987	25.2229	25.5424	25.493	25.7971	24.7385	25.5207	25.6128	24.7367	25.3607
Tb427_110014300	Tb427_110014300.1	http://tritrypdb.org/tritrypdb/processQuestion.do?questionFullName=GeneQuestions.GeneByLocusTag&questionSubmit=Get+Answer&ds_gene_ids_data=Tb427_110014300.1	Tb427_110014300	Tb427_110014300	Tb927.11.960:mRNA-p1	Tb927.11.960:mRNA-p1;Tb927.11.1660:mRNA-p1;Tb927.10.5770:mRNA-p1;Tb927.6.3790:mRNA-p1;Tb927.10.3520:mRNA-p1;Tb927.4.1250:mRNA-p1;Tb927.5.3920:mRNA-p1;Tb927.7.2500:mRNA-p1;Tb927.11.8730:mRNA-p1;Tb927.6.1090:mRNA-p1;Tb927.7.2550:mRNA-p1;Tb927.10.7620:mRNA-p1;Tb927.11.6350:mRNA-p1;Tb927.3.3280:mRNA-p1;Tb927.10.1210:mRNA-p1;Tb927.11.8350:mRNA-p1;Tb927.11.3740:mRNA-p1;Tb927.4.1400:mRNA-p1;Tb927.11.387…	ATPase family associated with various cellular activities (AAA), putative	7	7	7	12.6	71.369	657	26.2582	26.0152	25.47	26.1321	25.5969	26.1404	25.9006		26.333	25.7856	25.3147	25.426	26.1308	25.476	26.0099	25.7679	25.3838	25.4004	25.6284		25.7403		25.6935		26.2582	26.0152	25.47	26.1321	25.5969	26.1404	25.9006	24.6523	26.333	25.7856	25.3147	25.426
Tb427_100032000	Tb427_100032000.1	http://tritrypdb.org/tritrypdb/processQuestion.do?questionFullName=GeneQuestions.GeneByLocusTag&questionSubmit=Get+Answer&ds_gene_ids_data=Tb427_100032000.1	Tb427_100032000	Tb427_100032000	Tb927.10.2760:mRNA-p1	Tb927.10.2760:mRNA-p1;Tb927.6.2930:mRNA-p1;Tb927.7.2950:mRNA-p1;Tb927.8.3580:mRNA-p1;Tb927.11.11350:mRNA-p1;Tb927.10.9420:mRNA-p1;Tb927.10.9740:mRNA-p1	ATPase family associated with various cellular activities (AAA)/AAA domain (dynein-related subfamily), putative	10	10	10	14.8	81.151	722	25.882	25.3316		25.6919	25.4904		24.981	25.1038	25.8729	25.0953	25.7982	25.9473	25.2996	25.7706	25.5524	25.6739	25.5302	25.8031	26.0275	25.3133	25.7512	26.2196	26.1354	25.7501	25.882	25.3316	24.8083	25.6919	25.4904	24.7921	24.981	25.1038	25.8729	25.0953	25.7982	25.9473
Tb427_060037200	Tb427_060037200.1	http://tritrypdb.org/tritrypdb/processQuestion.do?questionFullName=GeneQuestions.GeneByLocusTag&questionSubmit=Get+Answer&ds_gene_ids_data=Tb427_060037200.1	Tb427_060037200	Tb427_060037200	Tb927.6.3210:mRNA-p1	Tb927.6.3210:mRNA-p1	ATPase family associated with various cellular activities (AAA)/AAA domain containing protein, putative	8	8	8	62.7	20.165	177	28.7232	28.2967	28.3859	27.9675	28.5592	28.4864	28.0451	27.8449	28.1837	28.0974	27.9726	28.042	28.3056	28.3089	28.1458	27.5923	27.7971		27.8094	27.7223	27.7912	27.4504	27.4031	28.114	28.7232	28.2967	28.3859	27.9675	28.5592	28.4864	28.0451	27.8449	28.1837	28.0974	27.9726	28.042
Tb427_020013100	Tb427_020013100.1	http://tritrypdb.org/tritrypdb/processQuestion.do?questionFullName=GeneQuestions.GeneByLocusTag&questionSubmit=Get+Answer&ds_gene_ids_data=Tb427_020013100.1	Tb427_020013100	Tb427_020013100	Tb927.2.3030:mRNA-p1	Tb927.2.3030:mRNA-p1;Tb927.2.5980:mRNA-p1;Tb927.6.3030:mRNA-p1	ATPase family associated with various cellular activities (AAA)/AAA lid domain/AAA domain (Cdc48 subfamily)/AAA domain (dynein-related subfamily)/C-terminal, D2-small domain, of ClpB protein, putative	54	54	54	65.8	90.65	812	32.6086	32.5824	32.459	32.5902	32.9687	32.7337	32.8702	32.8336	32.9683	32.8245	32.9275	32.9009	32.959	33.0067	33.0569	32.9733	32.9818	33.1927	33.0908	33.241	33.2278	33.3746	33.3031	33.459	32.6086	32.5824	32.459	32.5902	32.9687	32.7337	32.8702	32.8336	32.9683	32.8245	32.9275	32.9009
Tb427_060042900	Tb427_060042900.1	http://tritrypdb.org/tritrypdb/processQuestion.do?questionFullName=GeneQuestions.GeneByLocusTag&questionSubmit=Get+Answer&ds_gene_ids_data=Tb427_060042900.1	Tb427_060042900	Tb427_060042900	Tb927.6.3790:mRNA-p1	Tb927.6.3790:mRNA-p1;Tb927.10.5770:mRNA-p1;Tb927.11.1660:mRNA-p1;Tb927.5.3920:mRNA-p1;Tb927.10.3520:mRNA-p1;Tb927.11.960:mRNA-p1;Tb927.6.1090:mRNA-p1;Tb927.4.1250:mRNA-p1;Tb927.5.1870:mRNA-p1;Tb927.7.2500:mRNA-p1;Tb927.10.1210:mRNA-p1;Tb927.10.7620:mRNA-p1;Tb927.10.9740:mRNA-p1;Tb927.3.3280:mRNA-p1;Tb927.11.3740:mRNA-p1;Tb927.11.8350:mRNA-p1;Tb927.7.2550:mRNA-p1;Tb927.5.960:mRNA-p1;Tb927.10.13510…	ATPase family associated with various cellular activities (AAA)/AAA+ lid domain containing protein, putative	11	11	11	16.1	85.583	795	27.1046	27.1371	27.2001		27.2935	27.3837	27.4232	26.5047	26.909	27.0743	26.901	26.4498	27.3361	27.1872	26.9612	26.8799	26.6946	26.7393	26.5601	27.0493	26.5017	26.8478	26.6088	26.5205	27.1046	27.1371	27.2001	25.1518	27.2935	27.3837	27.4232	26.5047	26.909	27.0743	26.901	26.4498
Tb427_010012300	Tb427_010012300.1	http://tritrypdb.org/tritrypdb/processQuestion.do?questionFullName=GeneQuestions.GeneByLocusTag&questionSubmit=Get+Answer&ds_gene_ids_data=Tb427_010012300.1	Tb427_010012300	Tb427_010012300	Tb927.1.1560:mRNA-p1	Tb927.1.1560:mRNA-p1;Tb11.v5.0464.1-p1;Tb927.11.1680:mRNA-p1;Tb927.10.5770:mRNA-p1;Tb927.4.1250:mRNA-p1;Tb927.10.9740:mRNA-p1;Tb927.5.3920:mRNA-p1;Tb927.11.1660:mRNA-p1;Tb927.10.3520:mRNA-p1;Tb927.6.3790:mRNA-p1;Tb927.7.2550:mRNA-p1;Tb927.7.2500:mRNA-p1;Tb927.11.3740:mRNA-p1;Tb927.6.1090:mRNA-p1;Tb927.10.16150:mRNA-p1;Tb11.v5.0397.1-p1;Tb927.10.7620:mRNA-p1;Tb927.10.1210:mRNA-p1;Tb927.11.8350:mRN…	ATPase family associated with various cellular activities (AAA)/AAA+ lid domain containing protein, putative	33	33	32	48.6	79.953	725	30.6557	30.4599	30.6299	30.7017	30.9272	30.8795	30.9618	30.6734	30.6136	30.6767	30.6514	30.5753	30.8566	31.0032	30.9295	30.7642	30.9359	30.7601	30.5721	30.7975	30.8399	30.9693	30.6744	31.0744	30.6557	30.4599	30.6299	30.7017	30.9272	30.8795	30.9618	30.6734	30.6136	30.6767	30.6514	30.5753
Tb427_110021500	Tb427_110021500.1	http://tritrypdb.org/tritrypdb/processQuestion.do?questionFullName=GeneQuestions.GeneByLocusTag&questionSubmit=Get+Answer&ds_gene_ids_data=Tb427_110021500.1	Tb427_110021500	Tb427_110021500	Tb927.11.1680:mRNA-p1	Tb927.11.1680:mRNA-p1;Tb927.1.1560:mRNA-p1;Tb11.v5.0464.1-p1;Tb927.11.1660:mRNA-p1;Tb927.10.5770:mRNA-p1;Tb927.11.6350:mRNA-p1;Tb927.10.3520:mRNA-p1;Tb927.10.9740:mRNA-p1;Tb927.11.3740:mRNA-p1;Tb927.3.3280:mRNA-p1;Tb927.11.8350:mRNA-p1;Tb927.6.3790:mRNA-p1;Tb927.10.7620:mRNA-p1;Tb927.11.960:mRNA-p1;Tb927.5.960:mRNA-p1;Tb927.10.1210:mRNA-p1;Tb927.7.2550:mRNA-p1;Tb927.6.1090:mRNA-p1;Tb927.7.2500:mR…	ATPase family associated with various cellular activities (AAA)/AAA+ lid domain containing protein, putative	21	21	21	29.5	97.946	888	28.8133	29.0352	28.7121	29.0599	28.9913	29.2657	29.0132	28.5855	29.1073	29.0497	28.9012	28.853	29.2141	29.4375	29.2542	29.0979	29.0754	29.5244	29.023	29.6544	29.3541	29.4563	28.9562	29.4774	28.8133	29.0352	28.7121	29.0599	28.9913	29.2657	29.0132	28.5855	29.1073	29.0497	28.9012	28.853
Tb427_040035800	Tb427_040035800.1	http://tritrypdb.org/tritrypdb/processQuestion.do?questionFullName=GeneQuestions.GeneByLocusTag&questionSubmit=Get+Answer&ds_gene_ids_data=Tb427_040035800.1	Tb427_040035800	Tb427_040035800	Tb927.4.3300:mRNA-p1	Tb927.4.3300:mRNA-p1;Tb927.10.7620:mRNA-p1;Tb927.10.13510:mRNA-p1;Tb927.11.14730:mRNA-p1;Tb927.10.16150:mRNA-p1;Tb11.v5.0397.1-p1;Tb927.4.4210:mRNA-p1;Tb927.10.9740:mRNA-p1;Tb927.10.3520:mRNA-p1;Tb927.7.2500:mRNA-p1;Tb927.11.3740:mRNA-p1;Tb927.6.1090:mRNA-p1;Tb927.10.5770:mRNA-p1;Tb927.7.2550:mRNA-p1;Tb927.6.3790:mRNA-p1;Tb927.5.3920:mRNA-p1;Tb927.11.1660:mRNA-p1;Tb927.5.1870:mRNA-p1;Tb927.11.835…	ATPase family associated with various cellular activities (AAA)/AAA+ lid domain/Peptidase family M41, putative	23	23	23	33.2	78.787	719	29.9211	30.0157	30.0418	29.7711	30.181	29.8048	30.1283	29.7796	29.838	29.9446	29.9595	29.8705	30.153	30.1628	30.2865	29.9951	30.0411	30.5668	30.3645	29.9302	30.2304	30.2825	30.3427	30.2806	29.9211	30.0157	30.0418	29.7711	30.181	29.8048	30.1283	29.7796	29.838	29.9446	29.9595	29.8705
Tb427_040044800	Tb427_040044800.1	http://tritrypdb.org/tritrypdb/processQuestion.do?questionFullName=GeneQuestions.GeneByLocusTag&questionSubmit=Get+Answer&ds_gene_ids_data=Tb427_040044800.1	Tb427_040044800	Tb427_040044800	Tb927.4.4210:mRNA-p1	Tb927.4.4210:mRNA-p1;Tb927.10.7620:mRNA-p1;Tb927.10.13510:mRNA-p1;Tb927.11.14730:mRNA-p1;Tb11.v5.0397.1-p1;Tb927.10.16150:mRNA-p1;Tb927.4.3300:mRNA-p1;Tb927.11.3740:mRNA-p1;Tb927.6.1090:mRNA-p1;Tb927.7.2500:mRNA-p1;Tb927.10.3520:mRNA-p1;Tb927.10.9740:mRNA-p1;Tb927.10.5770:mRNA-p1;Tb927.7.2550:mRNA-p1;Tb927.11.1660:mRNA-p1;Tb927.5.3920:mRNA-p1;Tb927.6.3790:mRNA-p1;Tb927.4.1250:mRNA-p1;Tb927.11.960…	ATPase family associated with various cellular activities (AAA)/AAA+ lid domain/Peptidase family M41, putative	32	32	32	41.3	96.269	877	30.07	30.3083	30.1347	30.5076	30.1499	30.1841	30.3216	30.2093	30.1586	30.2231	30.23	30.2341	30.1599	30.2568	30.2047	30.2482	30.1421	30.6289	30.3455	30.4398	30.5917	30.4537	30.4874	30.5933	30.07	30.3083	30.1347	30.5076	30.1499	30.1841	30.3216	30.2093	30.1586	30.2231	30.23	30.2341
Tb427_100013500	Tb427_100013500.1	http://tritrypdb.org/tritrypdb/processQuestion.do?questionFullName=GeneQuestions.GeneByLocusTag&questionSubmit=Get+Answer&ds_gene_ids_data=Tb427_100013500.1	Tb427_100013500	Tb427_100013500	Tb927.10.1210:mRNA-p1	Tb927.10.1210:mRNA-p1;Tb11.v5.0486.1-p1;Tb927.11.8350:mRNA-p1;Tb927.11.3870:mRNA-p1;Tb927.3.1440:mRNA-p1;Tb927.3.3280:mRNA-p1;Tb927.5.1870:mRNA-p1;Tb927.10.5770:mRNA-p1;Tb927.10.3520:mRNA-p1;Tb927.11.1660:mRNA-p1;Tb927.5.3920:mRNA-p1;Tb927.7.2500:mRNA-p1;Tb927.10.9740:mRNA-p1;Tb927.4.1400:mRNA-p1;Tb927.6.1090:mRNA-p1;Tb927.5.960:mRNA-p1;Tb927.11.3740:mRNA-p1;Tb927.6.3790:mRNA-p1;Tb927.7.2550:mRNA…	ATPase family associated with various cellular activities (AAA)/AAA+ lid domain/Vps4 C terminal oligomerisation domain containing protein, putative	29	29	29	47.9	75.358	680	29.9552	29.7911	29.9546	29.3465	30.0451	29.7285	30.0453	29.5421	29.9066	29.8895	29.826	29.6912	30.1077	30.0283	30.1187	29.8213	29.8535	30.6174	30.0478	29.7709	30.1762	30.4187	30.1152	29.5637	29.9552	29.7911	29.9546	29.3465	30.0451	29.7285	30.0453	29.5421	29.9066	29.8895	29.826	29.6912
Tb427_100171100	Tb427_100171100.1	http://tritrypdb.org/tritrypdb/processQuestion.do?questionFullName=GeneQuestions.GeneByLocusTag&questionSubmit=Get+Answer&ds_gene_ids_data=Tb427_100171100.1	Tb427_100171100	Tb427_100171100	Tb11.v5.0397.1-p1	Tb11.v5.0397.1-p1;Tb927.10.16150:mRNA-p1;Tb927.10.13510:mRNA-p1;Tb927.11.14730:mRNA-p1;Tb927.4.4210:mRNA-p1;Tb927.4.3300:mRNA-p1;Tb927.10.7620:mRNA-p1;Tb927.11.3740:mRNA-p1;Tb927.10.9740:mRNA-p1;Tb927.7.2550:mRNA-p1;Tb927.7.2500:mRNA-p1;Tb927.6.1090:mRNA-p1;Tb927.10.5770:mRNA-p1;Tb927.11.1660:mRNA-p1;Tb927.10.3520:mRNA-p1;Tb927.6.3790:mRNA-p1;Tb927.11.3870:mRNA-p1;Tb927.5.3920:mRNA-p1;Tb927.10.12…	ATPase family associated with various cellular activities (AAA)/Peptidase family M41, putative	22	22	22	44.2	62.719	577	29.1617	28.9678	29.3059	29.4819	29.645	29.3851	29.4008	29.3272	29.382	29.434	29.3443	29.4312	29.289	29.6542	29.5653	29.5675	29.555	29.4903	29.5524	29.667	29.5895	29.4477	29.4272	29.8923	29.1617	28.9678	29.3059	29.4819	29.645	29.3851	29.4008	29.3272	29.382	29.434	29.3443	29.4312
Tb427_100142700	Tb427_100142700.1	http://tritrypdb.org/tritrypdb/processQuestion.do?questionFullName=GeneQuestions.GeneByLocusTag&questionSubmit=Get+Answer&ds_gene_ids_data=Tb427_100142700.1	Tb427_100142700	Tb427_100142700	Tb927.10.13510:mRNA-p1	Tb927.10.13510:mRNA-p1;Tb927.11.14730:mRNA-p1;Tb927.10.16150:mRNA-p1;Tb11.v5.0397.1-p1;Tb927.4.4210:mRNA-p1;Tb927.4.3300:mRNA-p1;Tb927.10.7620:mRNA-p1;Tb927.10.5770:mRNA-p1;Tb927.11.3740:mRNA-p1;Tb927.7.2500:mRNA-p1;Tb927.10.9740:mRNA-p1;Tb927.10.3520:mRNA-p1;Tb927.6.1090:mRNA-p1;Tb927.7.2550:mRNA-p1;Tb927.6.3790:mRNA-p1;Tb927.11.1660:mRNA-p1;Tb927.10.1210:mRNA-p1;Tb927.3.3280:mRNA-p1;Tb927.11.83…	ATPase family associated with various cellular activities (AAA)/Peptidase family M41, putative	20	20	20	41.1	62.807	569	30.3121	30.2523	30.1772	30.1466	30.2523	30.1825	30.2999	30.1156	30.0099	30.1183	30.1198	29.9944	30.4044	30.3998	30.2289	30.2557	30.3467	30.2852	30.287	30.6039	30.4666	30.1327	30.3889	30.7504	30.3121	30.2523	30.1772	30.1466	30.2523	30.1825	30.2999	30.1156	30.0099	30.1183	30.1198	29.9944
Tb427_110165700	Tb427_110165700.1	http://tritrypdb.org/tritrypdb/processQuestion.do?questionFullName=GeneQuestions.GeneByLocusTag&questionSubmit=Get+Answer&ds_gene_ids_data=Tb427_110165700.1	Tb427_110165700	Tb427_110165700	Tb927.11.14730:mRNA-p1	Tb927.11.14730:mRNA-p1;Tb927.10.13510:mRNA-p1;Tb11.v5.0397.1-p1;Tb927.10.16150:mRNA-p1;Tb927.10.7620:mRNA-p1;Tb927.4.3300:mRNA-p1;Tb927.4.4210:mRNA-p1;Tb927.10.9740:mRNA-p1;Tb927.11.3740:mRNA-p1;Tb927.10.5770:mRNA-p1;Tb927.7.2550:mRNA-p1;Tb927.11.1660:mRNA-p1;Tb927.6.1090:mRNA-p1;Tb927.10.3520:mRNA-p1;Tb927.7.2500:mRNA-p1;Tb927.6.3790:mRNA-p1;Tb927.3.3280:mRNA-p1;Tb927.10.1210:mRNA-p1;Tb927.11.83…	ATPase family associated with various cellular activities (AAA)/Peptidase family M41, putative	38	38	38	60.7	74.463	677	31.4363	31.4938	31.3957	31.3579	31.508	31.3774	31.4306	31.2942	31.4107	31.4638	31.5276	31.405	31.6194	31.5604	31.6623	31.6451	31.5823	31.5636	31.531	31.7259	31.6373	31.6507	31.7609	31.905	31.4363	31.4938	31.3957	31.3579	31.508	31.3774	31.4306	31.2942	31.4107	31.4638	31.5276	31.405
Tb427_110151400	Tb427_110151400.1	http://tritrypdb.org/tritrypdb/processQuestion.do?questionFullName=GeneQuestions.GeneByLocusTag&questionSubmit=Get+Answer&ds_gene_ids_data=Tb427_110151400.1	Tb427_110151400	Tb427_110151400	Tb927.11.13360:mRNA-p1	Tb927.11.13360:mRNA-p1;Tb927.11.3740:mRNA-p1;Tb927.10.5770:mRNA-p1;Tb927.6.1090:mRNA-p1;Tb927.10.1210:mRNA-p1;Tb927.10.9740:mRNA-p1;Tb927.7.2500:mRNA-p1;Tb927.7.2550:mRNA-p1;Tb927.5.3920:mRNA-p1;Tb927.10.7620:mRNA-p1;Tb927.11.8350:mRNA-p1;Tb927.5.960:mRNA-p1;Tb927.11.6350:mRNA-p1;Tb927.1.1560:mRNA-p1;Tb11.v5.0464.1-p1;Tb927.11.8730:mRNA-p1;Tb927.11.1660:mRNA-p1;Tb927.10.16150:mRNA-p1;Tb11.v5.0397…	ATPase family associated with various cellular activities (AAA)/Zonular occludens toxin (Zot), putative	45	45	45	42.5	141.17	1281	30.4967	30.4724	30.7036	30.2784	30.8238	30.7377	30.7978	30.3554	30.4662	30.371	30.2613	30.3405	30.4272	30.2831	30.3762	30.2507	30.2331	29.9591	29.7281	29.7345	29.6023	29.9613	29.5976	29.2237	30.4967	30.4724	30.7036	30.2784	30.8238	30.7377	30.7978	30.3554	30.4662	30.371	30.2613	30.3405
Tb427_100080100	Tb427_100080100.1	http://tritrypdb.org/tritrypdb/processQuestion.do?questionFullName=GeneQuestions.GeneByLocusTag&questionSubmit=Get+Answer&ds_gene_ids_data=Tb427_100080100.1	Tb427_100080100	Tb427_100080100	Tb927.10.7410:mRNA-p1	Tb927.10.7410:mRNA-p1	ATP-grasp domain/CoA-ligase, putative	41	41	41	88.1	44.905	419	34.7693	34.6765	34.7361	34.8198	35.1095	34.9092	35.0221	35.3276	35.3911	35.2384	35.2542	35.3564	35.4741	35.2894	35.1986	35.4128	35.4366	35.2709	35.4351	35.8598	35.3267	35.2779	35.4702	35.7934	34.7693	34.6765	34.7361	34.8198	35.1095	34.9092	35.0221	35.3276	35.3911	35.2384	35.2542	35.3564
Tb427_070056500	Tb427_070056500.1	http://tritrypdb.org/tritrypdb/processQuestion.do?questionFullName=GeneQuestions.GeneByLocusTag&questionSubmit=Get+Answer&ds_gene_ids_data=Tb427_070056500.1	Tb427_070056500	Tb427_070056500	Tb927.7.5080:mRNA-p1	Tb927.7.5080:mRNA-p1;Tb11.v5.0188.1-p1	ATP-NAD kinase, putative	12	12	12	25.9	79.807	723	26.2402	26.3518	26.2932	26.0899	26.9867	26.2813	26.5105	26.0632	27.0372	26.6667	26.493	26.872	26.9763	26.8029	26.7839	27.0908	26.7235	27.0084	27.2008	26.6683	26.8282	27.0881	27.2173	27.098	26.2402	26.3518	26.2932	26.0899	26.9867	26.2813	26.5105	26.0632	27.0372	26.6667	26.493	26.872
Tb427_020006900	Tb427_020006900.1	http://tritrypdb.org/tritrypdb/processQuestion.do?questionFullName=GeneQuestions.GeneByLocusTag&questionSubmit=Get+Answer&ds_gene_ids_data=Tb427_020006900.1	Tb427_020006900	Tb427_020006900	Tb927.2.1890:mRNA-p1	Tb927.2.1890:mRNA-p1	Autophagocytosis associated protein (Atg3), N-terminal domain/Autophagocytosis associated protein, active-site domain/Autophagocytosis associated protein C-terminal, putative	7	7	7	40.8	33.842	294	27.5858	27.8778	26.8912	27.2352	27.6533	27.732	27.4004	27.3705	27.8162	27.7292	27.5856	27.6652	27.8694	27.6705	27.4772	27.6803	27.2968	27.581	27.4822	27.2936	27.4865	27.7989	27.4572	27.4036	27.5858	27.8778	26.8912	27.2352	27.6533	27.732	27.4004	27.3705	27.8162	27.7292	27.5856	27.6652
Tb427_070065000	Tb427_070065000.1;Tb427_070064900.1	http://tritrypdb.org/tritrypdb/processQuestion.do?questionFullName=GeneQuestions.GeneByLocusTag&questionSubmit=Get+Answer&ds_gene_ids_data=Tb427_070065000.1,Tb427_070064900.1	Tb427_070065000;Tb427_070064900	Tb427_070065000	Tb927.7.5910:mRNA-p1;Tb927.7.5900:mRNA-p1	Tb927.7.5910:mRNA-p1;Tb927.7.5900:mRNA-p1;Tb927.7.3320:mRNA-p1	Autophagy protein Atg8 ubiquitin like/Ubiquitin-like autophagy protein Apg12, putative	6	6	6	50	13.751	120	28.7262	28.7021	28.805	28.4846	28.4679	28.341	28.3113	28.277	28.638	28.5417	28.4229	28.6495	28.5254	28.4139	28.3679	28.2129	28.4344	28.3841	28.572	28.1474	28.1779	27.7584	28.3562	27.6144	28.7262	28.7021	28.805	28.4846	28.4679	28.341	28.3113	28.277	28.638	28.5417	28.4229	28.6495
Tb427_060044400	Tb427_060044400.1	http://tritrypdb.org/tritrypdb/processQuestion.do?questionFullName=GeneQuestions.GeneByLocusTag&questionSubmit=Get+Answer&ds_gene_ids_data=Tb427_060044400.1	Tb427_060044400	Tb427_060044400	Tb927.6.3940:mRNA-p1	Tb927.6.3940:mRNA-p1	Autophagy-related protein 27, putative	13	13	13	49.5	39.236	364	30.4534	30.1854	29.9319	29.9193	30.2931	30.1694	30.3006	29.928	30.5623	30.018	30.0464	29.9546	30.193	30.0552	29.894	30.1323	30.2041	29.5842	29.7958	30.0443	29.4108	29.558	29.5824	29.582	30.4534	30.1854	29.9319	29.9193	30.2931	30.1694	30.3006	29.928	30.5623	30.018	30.0464	29.9546
Tb427_100125400	Tb427_100125400.1	http://tritrypdb.org/tritrypdb/processQuestion.do?questionFullName=GeneQuestions.GeneByLocusTag&questionSubmit=Get+Answer&ds_gene_ids_data=Tb427_100125400.1	Tb427_100125400	Tb427_100125400	Tb927.10.11800:mRNA-p1	Tb927.10.11800:mRNA-p1;Tb927.11.5510:mRNA-p1;Tb927.10.1130:mRNA-p1;Tb11.0520:mRNA-p1;Tb927.7.820:mRNA-p1	Axonemal dynein light chain, putative	13	13	13	35.9	42.112	373	27.9107	27.7574	27.4856	27.4924	28.4298	27.6745	27.7496	28.162	27.9719	27.9839	27.8566	27.9088	28.2479	27.9049	27.8824	27.693	28.3751	27.9587	27.9398	27.6272	27.7987	28.2557	28.1345	27.8041	27.9107	27.7574	27.4856	27.4924	28.4298	27.6745	27.7496	28.162	27.9719	27.9839	27.8566	27.9088
Tb427_110060200	Tb427_110060200.1	http://tritrypdb.org/tritrypdb/processQuestion.do?questionFullName=GeneQuestions.GeneByLocusTag&questionSubmit=Get+Answer&ds_gene_ids_data=Tb427_110060200.1	Tb427_110060200	Tb427_110060200	Tb927.11.5510:mRNA-p1	Tb927.11.5510:mRNA-p1;Tb927.10.1130:mRNA-p1;Tb11.0520:mRNA-p1;Tb927.10.11800:mRNA-p1;Tb927.7.820:mRNA-p1	Axonemal dynein light chain, putative	15	15	15	61.3	27.371	235	29.585	29.7569	29.3422	29.0716	29.9268	29.6075	29.417	29.461	29.0376	29.3242	29.1811	29.0368	29.5384	29.5609	29.5324	29.2305	29.4805	29.405	29.4234	29.3919	29.5864	29.7317	29.4223	29.7637	29.585	29.7569	29.3422	29.0716	29.9268	29.6075	29.417	29.461	29.0376	29.3242	29.1811	29.0368
Tb427_070011600	Tb427_070011600.1	http://tritrypdb.org/tritrypdb/processQuestion.do?questionFullName=GeneQuestions.GeneByLocusTag&questionSubmit=Get+Answer&ds_gene_ids_data=Tb427_070011600.1	Tb427_070011600	Tb427_070011600	Tb927.7.820:mRNA-p1	Tb927.7.820:mRNA-p1;Tb927.11.5510:mRNA-p1;Tb927.10.11800:mRNA-p1;Tb927.10.1130:mRNA-p1;Tb11.0520:mRNA-p1	Axonemal dynein light chain, putative	10	10	10	32	34.325	306	27.3089	27.393	27.0514	27.1366	27.3476	27.2468	27.0213	26.9178	27.091	26.9401	27.213	27.5276	27.1424	27.0117	27.7851	27.3948	27.5407	27.0074	27.6183	27.1449	27.7218	27.2683	27.6812	27.4323	27.3089	27.393	27.0514	27.1366	27.3476	27.2468	27.0213	26.9178	27.091	26.9401	27.213	27.5276
Tb427_100014300	Tb427_100014300.1	http://tritrypdb.org/tritrypdb/processQuestion.do?questionFullName=GeneQuestions.GeneByLocusTag&questionSubmit=Get+Answer&ds_gene_ids_data=Tb427_100014300.1	Tb427_100014300	Tb427_100014300	Tb927.10.1130:mRNA-p1	Tb927.10.1130:mRNA-p1;Tb11.0520:mRNA-p1;Tb927.11.5510:mRNA-p1;Tb927.10.11800:mRNA-p1;Tb927.7.820:mRNA-p1	Axonemal dynein light chain, putative	10	10	10	40.9	31.146	274	27.9087	27.4842	27.3807	27.2975	27.5703	27.0874	27.3037	27.5352	27.5133	27.408	27.0953	26.7358	27.7169	27.3946	27.2213	26.6549	27.6848	27.0819	27.1534	27.1298	27.4686	27.4436	27.3108	27.4443	27.9087	27.4842	27.3807	27.2975	27.5703	27.0874	27.3037	27.5352	27.5133	27.408	27.0953	26.7358
Tb427_100026700	Tb427_100026700.1	http://tritrypdb.org/tritrypdb/processQuestion.do?questionFullName=GeneQuestions.GeneByLocusTag&questionSubmit=Get+Answer&ds_gene_ids_data=Tb427_100026700.1	Tb427_100026700	Tb427_100026700	Tb927.10.2250:mRNA-p1	Tb927.10.2250:mRNA-p1	B domain of TMEM189, localisation domain containing protein, putative	5	5	5	17.1	33.765	299	27.8391	28.084	26.2554	26.9486		26.2148	25.8147	25.3422	25.7448		26.3669	26.1016		26.6418	25.8286	26.0913		26.8001	26.315	27.0108	26.5047	26.1932	26.3242	26.646	27.8391	28.084	26.2554	26.9486	24.5322	26.2148	25.8147	25.3422	25.7448	24.8218	26.3669	26.1016
Tb427_090032300	Tb427_090032300.1	http://tritrypdb.org/tritrypdb/processQuestion.do?questionFullName=GeneQuestions.GeneByLocusTag&questionSubmit=Get+Answer&ds_gene_ids_data=Tb427_090032300.1	Tb427_090032300	Tb427_090032300	Tb927.9.5900:mRNA-p1	Tb927.9.5900:mRNA-p1	Bacterial NAD-glutamate dehydrogenase/Glutamate/Leucine/Phenylalanine/Valine dehydrogenase, putative	92	92	92	79.7	112.13	992	36.164	36.2164	36.1777	36.2168	36.7623	36.7175	36.7119	36.8958	36.6478	36.8539	36.7625	36.7796	36.7497	36.7857	36.7952	36.7905	36.7706	36.8928	36.9863	36.9502	36.8726	36.8026	37.0462	37.0016	36.164	36.2164	36.1777	36.2168	36.7623	36.7175	36.7119	36.8958	36.6478	36.8539	36.7625	36.7796
Tb427_110077200	Tb427_110077200.1	http://tritrypdb.org/tritrypdb/processQuestion.do?questionFullName=GeneQuestions.GeneByLocusTag&questionSubmit=Get+Answer&ds_gene_ids_data=Tb427_110077200.1	Tb427_110077200	Tb427_110077200	Tb927.11.7212:mRNA-p1	Tb927.11.7212:mRNA-p1;Tb11.02.5070b.1-p1;Tb927.5.3700:mRNA-p1	Bacterial transferase hexapeptide (six repeats), putative	7	7	7	28.1	33.453	303	29.0006	28.947	28.7787		28.8497	29.0884	29.0392		29.3291	29.6549	28.762	28.9613	28.8541	29.4	28.9471	29.4319	28.8873	29.5716	29.1944	29.1803	29.0193	28.8921	28.9653	28.7129	29.0006	28.947	28.7787	24.689	28.8497	29.0884	29.0392	24.7003	29.3291	29.6549	28.762	28.9613
Tb427_050043500	Tb427_050043500.1	http://tritrypdb.org/tritrypdb/processQuestion.do?questionFullName=GeneQuestions.GeneByLocusTag&questionSubmit=Get+Answer&ds_gene_ids_data=Tb427_050043500.1	Tb427_050043500	Tb427_050043500	Tb927.5.3700:mRNA-p1	Tb927.5.3700:mRNA-p1;Tb11.02.5070b.1-p1;Tb927.11.7212:mRNA-p1;Tb927.11.10880:mRNA-p1	Bacterial transferase hexapeptide (six repeats), putative	6	6	6	19.9	32.257	292										25.916		26.1424	25.7355			26.4441			25.9524	26.1349	25.6797	25.9968	25.9744		24.8475	24.0132	24.6905	25.1077	24.1905	24.6011	24.9	24.1698	24.2829	25.916	24.3984	26.1424
Tb427_090052400	Tb427_090052400.1	http://tritrypdb.org/tritrypdb/processQuestion.do?questionFullName=GeneQuestions.GeneByLocusTag&questionSubmit=Get+Answer&ds_gene_ids_data=Tb427_090052400.1	Tb427_090052400	Tb427_090052400	Tb927.9.9270:mRNA-p1	Tb927.9.9270:mRNA-p1	bacteroidetes VLRF1 release factor, putative	6	6	6	15.5	56.827	515	26.0277	26.0775			26.0607							26.0738	25.7529	25.7389											26.0277	26.0775	24.3161	24.8009	26.0607	24.5005	24.1715	24.0837	24.6238	24.446	24.6243	26.0738
Tb427_020017100	Tb427_020017100.1	http://tritrypdb.org/tritrypdb/processQuestion.do?questionFullName=GeneQuestions.GeneByLocusTag&questionSubmit=Get+Answer&ds_gene_ids_data=Tb427_020017100.1	Tb427_020017100	Tb427_020017100	Tb927.2.3660:mRNA-p1	Tb927.2.3660:mRNA-p1;Tb11.v5.0450.1-p1;Tb11.v5.0451.1-p1;Tb927.8.2060:mRNA-p1;Tb11.v5.0207.1-p1;Tb927.10.6150:mRNA-p1;Tb927.11.7220:mRNA-p1	Beige/BEACH domain containing protein, putative	19	19	19	6.1	393.86	3577	25.8674	25.8658	25.7919		25.6153	25.6128	25.8917		26.0907	25.8613	26.2837	25.8153	26.1286	26.2224	25.6434	25.9104	25.8094	27.2914	26.604	26.6655	26.4406	27.236	26.4296	25.8608	25.8674	25.8658	25.7919	25.0604	25.6153	25.6128	25.8917	24.7601	26.0907	25.8613	26.2837	25.8153
Tb427_080023500	Tb427_080023500.1	http://tritrypdb.org/tritrypdb/processQuestion.do?questionFullName=GeneQuestions.GeneByLocusTag&questionSubmit=Get+Answer&ds_gene_ids_data=Tb427_080023500.1	Tb427_080023500	Tb427_080023500	Tb927.8.2060:mRNA-p1	Tb927.8.2060:mRNA-p1;Tb927.2.3660:mRNA-p1;Tb11.v5.0207.1-p1;Tb927.10.6150:mRNA-p1;Tb927.11.7220:mRNA-p1	Beige/BEACH domain containing protein, putative	16	16	16	7.3	328.11	2949									26.7767		26.6133	26.995		27.077	26.7591	26.9783	27.4901	27.1781	27.456	27.0125	26.7867				25.0094	24.2158	24.5687	24.9504	24.2467	24.4091	24.5601	24.7801	26.7767	24.8455	26.6133	26.995
Tb427_020017800	Tb427_020017800.1	http://tritrypdb.org/tritrypdb/processQuestion.do?questionFullName=GeneQuestions.GeneByLocusTag&questionSubmit=Get+Answer&ds_gene_ids_data=Tb427_020017800.1	Tb427_020017800	Tb427_020017800	Tb927.2.3910:mRNA-p1	Tb927.2.3910:mRNA-p1	Beta-ketoacyl synthase, N-terminal domain/Beta-ketoacyl synthase, C-terminal domain containing protein, putative	12	12	12	42.8	52.005	500	27.7814	27.8993	27.7735	27.4926	28.1589	28.0611	28.121	27.612	27.9605	28.1183	27.957	28.0306	28.3723	28.5452	28.1507	28.4621	28.4275	28.7352	28.3538	28.8917	28.79	28.6716	28.4751	29.4063	27.7814	27.8993	27.7735	27.4926	28.1589	28.0611	28.121	27.612	27.9605	28.1183	27.957	28.0306
Tb427_070037100	Tb427_070037100.1	http://tritrypdb.org/tritrypdb/processQuestion.do?questionFullName=GeneQuestions.GeneByLocusTag&questionSubmit=Get+Answer&ds_gene_ids_data=Tb427_070037100.1	Tb427_070037100	Tb427_070037100	Tb927.7.3170:mRNA-p1	Tb927.7.3170:mRNA-p1;Tb927.8.3280:mRNA-p1	Beta-lactamase superfamily domain containing protein, putative	11	11	11	41.4	43.099	391	27.9444	28.4722	28.4405	28.4922	28.747	28.6644	28.5392	28.8856	29.0647	28.9613	28.7549	29.0468	28.8037	28.9906	28.8939	29.1641	28.8517	28.6067	28.9208	28.853	28.8968	28.2311	28.8287	29.1316	27.9444	28.4722	28.4405	28.4922	28.747	28.6644	28.5392	28.8856	29.0647	28.9613	28.7549	29.0468
Tb427_080037300	Tb427_080037300.1	http://tritrypdb.org/tritrypdb/processQuestion.do?questionFullName=GeneQuestions.GeneByLocusTag&questionSubmit=Get+Answer&ds_gene_ids_data=Tb427_080037300.1	Tb427_080037300	Tb427_080037300	Tb927.8.3280:mRNA-p1	Tb927.8.3280:mRNA-p1;Tb927.7.3170:mRNA-p1	Beta-lactamase superfamily domain containing protein, putative	9	9	9	27.5	40.336	367	28.3338	27.8701	28.2449	28.2095	28.1855	28.0909	28.3024	27.9877	28.4738	28.0685	28.7588	28.8112	28.3047	28.2663	28.3714	28.7586	28.8514	28.3275	28.7788	28.8066	28.5119	28.3019	28.7595	28.8336	28.3338	27.8701	28.2449	28.2095	28.1855	28.0909	28.3024	27.9877	28.4738	28.0685	28.7588	28.8112
Tb427_110128600	Tb427_110128600.1	http://tritrypdb.org/tritrypdb/processQuestion.do?questionFullName=GeneQuestions.GeneByLocusTag&questionSubmit=Get+Answer&ds_gene_ids_data=Tb427_110128600.1	Tb427_110128600	Tb427_110128600	Tb927.11.11310:mRNA-p1	Tb927.11.11310:mRNA-p1	Beta-lactamase, putative	16	16	16	38	55.601	498	27.9881	28.0278	27.7342	28.0931	28.0003	28.2369	28.1801	28.1327	28.0816	28.242	27.8516	28.245	28.0769	28.2962	28.2253	28.2679	28.2117	28.4063	28.21	28.3877	27.9928	27.9913	28.1561	27.7354	27.9881	28.0278	27.7342	28.0931	28.0003	28.2369	28.1801	28.1327	28.0816	28.242	27.8516	28.245
Tb427_110091600	Tb427_110091600.1	http://tritrypdb.org/tritrypdb/processQuestion.do?questionFullName=GeneQuestions.GeneByLocusTag&questionSubmit=Get+Answer&ds_gene_ids_data=Tb427_110091600.1	Tb427_110091600	Tb427_110091600	Tb927.11.8390:mRNA-p1	Tb927.11.8390:mRNA-p1;Tb927.11.12150:mRNA-p1;Tb927.10.5650:mRNA-p1	BILBO1 N-terminal domain containing protein, putative	13	13	13	29.7	49.027	421	27.5508	27.8637	27.5888	28.209	27.1939	27.9856	27.6994	27.837	28.0145	28.0597	28.2299	28.1013	27.7329	28.0939	28.2758	28.282	28.4979	28.6829	28.7717	28.3294	28.732	28.7358	28.5571	28.5896	27.5508	27.8637	27.5888	28.209	27.1939	27.9856	27.6994	27.837	28.0145	28.0597	28.2299	28.1013
Tb427_110138200	Tb427_110138200.1	http://tritrypdb.org/tritrypdb/processQuestion.do?questionFullName=GeneQuestions.GeneByLocusTag&questionSubmit=Get+Answer&ds_gene_ids_data=Tb427_110138200.1	Tb427_110138200	Tb427_110138200	Tb927.11.12150:mRNA-p1	Tb927.11.12150:mRNA-p1;Tb927.10.5650:mRNA-p1;Tb927.11.8390:mRNA-p1;Tb927.8.5550:mRNA-p1	BILBO1 N-terminal domain/EF-hand domain pair, putative	30	30	30	54	67.325	587	31.7474	31.6445	31.5479	31.5112	31.7513	31.532	31.6733	31.4073	31.5856	31.4881	31.5341	31.4079	31.5838	31.5312	31.7347	31.4325	31.7246	31.4163	31.1632	31.4828	31.6316	31.6448	31.6135	31.6899	31.7474	31.6445	31.5479	31.5112	31.7513	31.532	31.6733	31.4073	31.5856	31.4881	31.5341	31.4079
Tb427_080076000	Tb427_080076000.1	http://tritrypdb.org/tritrypdb/processQuestion.do?questionFullName=GeneQuestions.GeneByLocusTag&questionSubmit=Get+Answer&ds_gene_ids_data=Tb427_080076000.1	Tb427_080076000	Tb427_080076000	Tb927.8.6970:mRNA-p1	Tb927.8.6970:mRNA-p1;Tb927.4.5350:pseudogenic_transcript-p1;Tb927.8.7100:mRNA-p1	Biotin carboxylase, N-terminal domain/Carbamoyl-phosphate synthase L chain, ATP binding domain/ATP-grasp domain/D-ala D-ala ligase C-terminus/Biotin carboxylase C-terminal domain/Biotin-lipoyl like/Biotin-requiring enzyme, putative	24	24	3	48.4	73.887	678	28.7377	29.3701	29.4222	29.2505	29.5538	29.5799	29.733	29.3622	29.5934	29.6723	29.5825	29.408	29.7308	29.8007	29.3647	29.4787	29.4455	29.7283	29.5935	29.7584	29.5644	29.8211	29.7477	29.8216	28.7377	29.3701	29.4222	29.2505	29.5538	29.5799	29.733	29.3622	29.5934	29.6723	29.5825	29.408
Tb427_080077300	Tb427_080077300.1	http://tritrypdb.org/tritrypdb/processQuestion.do?questionFullName=GeneQuestions.GeneByLocusTag&questionSubmit=Get+Answer&ds_gene_ids_data=Tb427_080077300.1	Tb427_080077300	Tb427_080077300	Tb927.8.7100:mRNA-p1	Tb927.8.7100:mRNA-p1;Tb927.4.5350:pseudogenic_transcript-p1;Tb927.8.6970:mRNA-p1	Biotin carboxylase, N-terminal domain/Carbamoyl-phosphate synthase L chain, ATP binding domain/D-ala D-ala ligase C-terminus/Biotin carboxylase C-terminal domain/Biotin-requiring enzyme/Acetyl-CoA carboxylase, central region/Carboxyl transferase domain containing protein, putative	98	98	98	51.4	242.81	2181	33.2352	33.3916	33.3614	33.2936	33.1484	33.139	33.2007	33.2598	33.0344	33.1444	33.1555	33.2246	32.9224	33.1747	33.1361	33.2446	32.5255	33.447	32.9057	32.8632	32.8491	33.4154	32.9601	32.613	33.2352	33.3916	33.3614	33.2936	33.1484	33.139	33.2007	33.2598	33.0344	33.1444	33.1555	33.2246
Tb427_110109100	Tb427_110109100.1	http://tritrypdb.org/tritrypdb/processQuestion.do?questionFullName=GeneQuestions.GeneByLocusTag&questionSubmit=Get+Answer&ds_gene_ids_data=Tb427_110109100.1	Tb427_110109100	Tb427_110109100	Tb927.11.10060:mRNA-p1	Tb927.11.10060:mRNA-p1	Biotin/lipoate A/B protein ligase family, putative	16	16	16	76.5	26.487	247	32.8068	32.7946	32.6348	32.5293	32.6508	32.5459	32.8184	32.6096	32.5375	32.5627	32.339	32.2971	32.4512	32.5264	32.2486	32.3562	31.9801	31.7836	31.7516	32.4938	31.7118	31.6743	31.7962	31.791	32.8068	32.7946	32.6348	32.5293	32.6508	32.5459	32.8184	32.6096	32.5375	32.5627	32.339	32.2971
Tb427_080006500	Tb427_080006500.1	http://tritrypdb.org/tritrypdb/processQuestion.do?questionFullName=GeneQuestions.GeneByLocusTag&questionSubmit=Get+Answer&ds_gene_ids_data=Tb427_080006500.1	Tb427_080006500	Tb427_080006500	Tb927.8.630:mRNA-p1	Tb927.8.630:mRNA-p1	Biotin/lipoate A/B protein ligase family, putative	11	11	11	31.1	57.122	512	27.5422	27.241	27.2265	27.0647	27.1278	27.4583	27.2375	26.6167	27.7585	27.3969	27.2253	27.2971	27.4169	27.2443	27.1949	27.7977	27.4774	27.4919	27.7604	27.8703	27.8294	28.2762	28.0315	27.8024	27.5422	27.241	27.2265	27.0647	27.1278	27.4583	27.2375	26.6167	27.7585	27.3969	27.2253	27.2971
Tb427_100027700	Tb427_100027700.1	http://tritrypdb.org/tritrypdb/processQuestion.do?questionFullName=GeneQuestions.GeneByLocusTag&questionSubmit=Get+Answer&ds_gene_ids_data=Tb427_100027700.1	Tb427_100027700	Tb427_100027700	Tb927.10.2350:mRNA-p1	Tb927.10.2350:mRNA-p1;Tb927.10.7570:mRNA-p1;Tb927.11.11680:mRNA-p1	Biotin-requiring enzyme, putative	13	13	13	62.6	27.553	262	30.9414	30.9577	30.6842	30.9126	30.9054	30.7682	30.7257	31.2748	30.878	30.8096	30.8974	31.0889	30.9561	30.8268	30.8921	31.0743	31.0988	31.0356	31.3647	31.1652	31.0469	31.0932	31.508	31.38	30.9414	30.9577	30.6842	30.9126	30.9054	30.7682	30.7257	31.2748	30.878	30.8096	30.8974	31.0889
Tb427_110133300	Tb427_110133300.1	http://tritrypdb.org/tritrypdb/processQuestion.do?questionFullName=GeneQuestions.GeneByLocusTag&questionSubmit=Get+Answer&ds_gene_ids_data=Tb427_110133300.1	Tb427_110133300	Tb427_110133300	Tb927.11.11680:mRNA-p1	Tb927.11.11680:mRNA-p1;Tb927.5.4330:mRNA-p1;Tb927.10.7570:mRNA-p1;Tb11.v5.0774.1-p1;Tb927.10.2350:mRNA-p1	Biotin-requiring enzyme/2-oxoacid dehydrogenases acyltransferase (catalytic domain), putative	28	28	28	73.9	41.143	383	34.4996	34.5998	34.66	34.3588	34.4961	34.6431	34.6905	34.427	34.9272	34.9021	34.8838	35.0127	34.9147	35.0906	35.1024	35.1083	34.907	35.3527	35.298	35.4543	35.2123	35.2094	35.3347	35.6384	34.4996	34.5998	34.66	34.3588	34.4961	34.6431	34.6905	34.427	34.9272	34.9021	34.8838	35.0127
Tb427_050050800	Tb427_050050800.1	http://tritrypdb.org/tritrypdb/processQuestion.do?questionFullName=GeneQuestions.GeneByLocusTag&questionSubmit=Get+Answer&ds_gene_ids_data=Tb427_050050800.1	Tb427_050050800	Tb427_050050800	Tb927.5.4330:mRNA-p1	Tb927.5.4330:mRNA-p1;Tb927.11.11680:mRNA-p1;Tb927.10.7570:mRNA-p1;Tb11.v5.0774.1-p1	Biotin-requiring enzyme/e3 binding domain/2-oxoacid dehydrogenases acyltransferase (catalytic domain), putative	26	26	26	65.6	47.543	439	30.8804	30.9586	31.0432	30.8379	31.1697	31.0253	31.1749	31.3898	31.3708	31.2759	31.1569	31.3496	31.436	31.3894	31.5271	31.6079	31.3988	31.806	31.539	31.7198	31.6638	31.7328	31.7706	31.9443	30.8804	30.9586	31.0432	30.8379	31.1697	31.0253	31.1749	31.3898	31.3708	31.2759	31.1569	31.3496
Tb427_100081800	Tb427_100081800.1	http://tritrypdb.org/tritrypdb/processQuestion.do?questionFullName=GeneQuestions.GeneByLocusTag&questionSubmit=Get+Answer&ds_gene_ids_data=Tb427_100081800.1	Tb427_100081800	Tb427_100081800	Tb927.10.7570:mRNA-p1	Tb927.10.7570:mRNA-p1;Tb11.v5.0774.1-p1;Tb927.11.11680:mRNA-p1;Tb927.5.4330:mRNA-p1;Tb927.10.2350:mRNA-p1	Biotin-requiring enzyme/e3 binding domain/2-oxoacid dehydrogenases acyltransferase (catalytic domain), putative	28	28	28	62.1	48.108	451	33.5819	33.5755	33.5266	33.5296	33.5243	33.4627	33.5701	33.9183	33.7736	33.7286	33.743	33.7886	33.7987	34.0337	33.6729	33.935	34.0847	34.058	34.1131	34.3627	34.2936	34.1695	34.2719	34.7105	33.5819	33.5755	33.5266	33.5296	33.5243	33.4627	33.5701	33.9183	33.7736	33.7286	33.743	33.7886
Tb427_110087100	Tb427_110087100.1	http://tritrypdb.org/tritrypdb/processQuestion.do?questionFullName=GeneQuestions.GeneByLocusTag&questionSubmit=Get+Answer&ds_gene_ids_data=Tb427_110087100.1	Tb427_110087100	Tb427_110087100	Tb927.7.6850:mRNA-p1	Tb927.7.6850:mRNA-p1;Tb927.7.6830:mRNA-p1;Tb927.8.7340:mRNA-p1;Tb927.5.640:mRNA-p1;Tb927.8.7350:mRNA-p1;Tb927.7.7480:mRNA-p1;Tb927.2.5280:mRNA-p1;Tb927.11.11410:mRNA-p1;Tb927.5.440:mRNA-p1;Tb11.v5.0223.1-p1	BNR repeat-like domain containing protein, putative	30	2	2	50.3	84.533	771	29.5271	29.4029	28.1099		28.7214	28.8105	28.8624		28.0729	27.7683	28.0327		28.2651	27.8857	27.479	26.8886		27.4875	27.7467	26.6767	27.1669		27.9604		29.5271	29.4029	28.1099	24.8708	28.7214	28.8105	28.8624	25.1836	28.0729	27.7683	28.0327	24.9827
Tb427_070075200	Tb427_070075200.1;Tb427_070074900.1	http://tritrypdb.org/tritrypdb/processQuestion.do?questionFullName=GeneQuestions.GeneByLocusTag&questionSubmit=Get+Answer&ds_gene_ids_data=Tb427_070075200.1,Tb427_070074900.1	Tb427_070075200;Tb427_070074900	Tb427_070075200	Tb927.7.6850:mRNA-p1;Tb927.7.6830:mRNA-p1	Tb927.7.6850:mRNA-p1;Tb927.7.6830:mRNA-p1;Tb927.8.7340:mRNA-p1;Tb927.5.640:mRNA-p1;Tb927.8.7350:mRNA-p1;Tb927.7.7480:mRNA-p1;Tb927.2.5280:mRNA-p1;Tb927.11.11410:mRNA-p1;Tb927.5.440:mRNA-p1;Tb11.v5.0223.1-p1	BNR repeat-like domain containing protein, putative	30	30	2	50.3	84.529	771	31.7264	31.602	31.8017	29.1203	31.5066	31.0024	31.7721	29.0183	31.5064	31.0809	31.0772	30.0292	31.2607	30.9302	31.6345	30.4284	31.2525	30.3346	31.0923	29.8395	30.6411	30.4184	31.1848	29.144	31.7264	31.602	31.8017	29.1203	31.5066	31.0024	31.7721	29.0183	31.5064	31.0809	31.0772	30.0292
Tb427_020027500	Tb427_020027500.1	http://tritrypdb.org/tritrypdb/processQuestion.do?questionFullName=GeneQuestions.GeneByLocusTag&questionSubmit=Get+Answer&ds_gene_ids_data=Tb427_020027500.1	Tb427_020027500	Tb427_020027500	Tb927.2.5280:mRNA-p1	Tb927.2.5280:mRNA-p1;Tb927.7.6850:mRNA-p1;Tb927.8.7350:mRNA-p1;Tb927.8.7340:mRNA-p1;Tb927.5.640:mRNA-p1;Tb927.7.7480:mRNA-p1;Tb927.11.11410:mRNA-p1;Tb927.7.6830:mRNA-p1;Tb927.5.440:mRNA-p1;Tb11.v5.0223.1-p1	BNR repeat-like domain containing protein, putative	17	17	17	27.4	77.233	702	28.1555	28.8963	28.946	28.4795	28.7802	28.7785	28.6578	27.2954	28.3069	28.2935	28.2813	27.9946	28.0162	27.8156	28.4822	27.7378	27.1727	26.8422	27.8397	27.7472	27.4062	26.8251	27.2653	26.5766	28.1555	28.8963	28.946	28.4795	28.7802	28.7785	28.6578	27.2954	28.3069	28.2935	28.2813	27.9946
Tb427_080079300:pseudogene	Tb427_080079300.1	http://tritrypdb.org/tritrypdb/processQuestion.do?questionFullName=GeneQuestions.GeneByLocusTag&questionSubmit=Get+Answer&ds_gene_ids_data=Tb427_080079300.1	Tb427_080079300:pseudogene	Tb427_080079300:pseudogene	Tb927.8.7340:mRNA-p1	Tb927.8.7340:mRNA-p1;Tb927.8.7350:mRNA-p1;Tb927.7.7480:mRNA-p1;Tb927.5.640:mRNA-p1;Tb927.7.6850:mRNA-p1;Tb927.2.5280:mRNA-p1;Tb927.7.6830:mRNA-p1;Tb927.11.11410:mRNA-p1;Tb927.5.440:mRNA-p1;Tb11.v5.0223.1-p1	BNR repeat-like domain containing protein, putative	19	18	18	39.6	67.038	619	29.4194	29.1187	29.3284	28.4543	29.2238	28.7898	28.7443	28.541	28.7204	28.4974	28.4568	28.3941	28.1287	27.719	28.0526	27.8149	27.4676	26.1176	27.7133	27.3567	26.7572	26.4017	26.8345	26.9626	29.4194	29.1187	29.3284	28.4543	29.2238	28.7898	28.7443	28.541	28.7204	28.4974	28.4568	28.3941
Tb427_050008600	Tb427_050008600.1	http://tritrypdb.org/tritrypdb/processQuestion.do?questionFullName=GeneQuestions.GeneByLocusTag&questionSubmit=Get+Answer&ds_gene_ids_data=Tb427_050008600.1	Tb427_050008600	Tb427_050008600	Tb927.5.440:mRNA-p1	Tb927.5.440:mRNA-p1;Tb11.v5.0223.1-p1;Tb927.8.7340:mRNA-p1;Tb927.8.7350:mRNA-p1;Tb927.7.6850:mRNA-p1;Tb927.7.7480:mRNA-p1;Tb927.2.5280:mRNA-p1;Tb927.5.640:mRNA-p1	BNR repeat-like domain containing protein, putative	39	39	39	67.4	84.59	775	32.3109	31.4779	32.7899	30.424	28.7229	28.5982	29.5058		27.9759	28.089	27.9281	26.5149	27.6288	27.3921	29.2247	26.6596	28.1053	28.6642	28.3131	25.6734	28.114	29.1629	27.393	23.8346	32.3109	31.4779	32.7899	30.424	28.7229	28.5982	29.5058	24.9126	27.9759	28.089	27.9281	26.5149
Tb427_080067600	Tb427_080067600.1	http://tritrypdb.org/tritrypdb/processQuestion.do?questionFullName=GeneQuestions.GeneByLocusTag&questionSubmit=Get+Answer&ds_gene_ids_data=Tb427_080067600.1	Tb427_080067600	Tb427_080067600	Tb927.8.6190:mRNA-p1	Tb927.8.6190:mRNA-p1	BolA-like protein, putative	5	5	5	41.4	9.6542	87		26.3588		26.3613	26.8583	26.347	26.5585	26.4763	26.6202	26.6157	26.6771	26.7288	26.8844	26.4423		26.5884	26.4248	26.8187	26.8616	26.6895	26.5596	26.3489	27.0925	26.6271	24.2849	26.3588	24.7776	26.3613	26.8583	26.347	26.5585	26.4763	26.6202	26.6157	26.6771	26.7288
Tb427_100006000	Tb427_100006000.1	http://tritrypdb.org/tritrypdb/processQuestion.do?questionFullName=GeneQuestions.GeneByLocusTag&questionSubmit=Get+Answer&ds_gene_ids_data=Tb427_100006000.1	Tb427_100006000	Tb427_100006000	Tb927.10.260:mRNA-p1	Tb927.10.260:mRNA-p1	BolA-like protein, putative	5	5	5	68.8	8.8512	77	26.4435	26.6755	26.5986		27.3662	26.921	27.1831		27.0181	27.5921	27.34	27.2869	27.8159	27.9806	27.7059	27.5738	26.9778	27.4373	27.2044	28.0254	27.55	26.9449	27.4194	27.0624	26.4435	26.6755	26.5986	24.621	27.3662	26.921	27.1831	24.8525	27.0181	27.5921	27.34	27.2869
Tb427_110073000	Tb427_110073000.1	http://tritrypdb.org/tritrypdb/processQuestion.do?questionFullName=GeneQuestions.GeneByLocusTag&questionSubmit=Get+Answer&ds_gene_ids_data=Tb427_110073000.1	Tb427_110073000	Tb427_110073000	Tb927.11.6790:mRNA-p1	Tb927.11.6790:mRNA-p1;Tb927.11.460:mRNA-p1;Tb927.10.2860:mRNA-p1;Tb927.11.11360:mRNA-p1;Tb927.11.11370:mRNA-p1;Tb927.10.960:mRNA-p1;Tb11.v5.0631.1-p1	BOP1NT (NUC169) domain/WD domain, G-beta repeat, putative	27	27	27	38	89.011	781	30.6696	30.6456	30.7979	30.6887	30.4542	30.5601	30.5741	30.3521	29.7177	30.3677	30.0624	29.9389	29.8699	30.0342	30.2469	30.1051	29.6041	29.6022	29.0058	29.4313	29.1872	29.1981	28.4413	28.4972	30.6696	30.6456	30.7979	30.6887	30.4542	30.5601	30.5741	30.3521	29.7177	30.3677	30.0624	29.9389
Tb427_010006100	Tb427_010006100.1	http://tritrypdb.org/tritrypdb/processQuestion.do?questionFullName=GeneQuestions.GeneByLocusTag&questionSubmit=Get+Answer&ds_gene_ids_data=Tb427_010006100.1	Tb427_010006100	Tb427_010006100	Tb927.1.640:mRNA-p1	Tb927.1.640:mRNA-p1	BRCA2, oligonucleotide/oligosaccharide-binding, domain 1, putative	15	15	15	19.7	162.65	1516	28.2502	27.7586	27.5879	27.5228	28.0071	28.2019	27.9514	27.8826	27.6615	27.9322	27.6178	27.6739	28.0339	27.6239	27.5017	27.8097	26.6213	27.2706	27.2202	26.8803	26.4712	27.4408	26.5533	26.4597	28.2502	27.7586	27.5879	27.5228	28.0071	28.2019	27.9514	27.8826	27.6615	27.9322	27.6178	27.6739
Tb427_100119600	Tb427_100119600.1	http://tritrypdb.org/tritrypdb/processQuestion.do?questionFullName=GeneQuestions.GeneByLocusTag&questionSubmit=Get+Answer&ds_gene_ids_data=Tb427_100119600.1	Tb427_100119600	Tb427_100119600	Tb927.10.11250:mRNA-p1	Tb927.10.11250:mRNA-p1;Tb11.v5.0575.1-p1	BRE1 E3 ubiquitin ligase, putative	29	29	29	32.7	101.15	872	28.5526	28.4147	28.4367	28.5387	28.5444	28.3805	28.5875	28.3677	28.5192	28.6097	28.5038	28.1958	28.9579	28.7633	28.8542	28.4867	28.8097	28.6726	28.5416	28.6379	28.9284	28.6999	28.7961	28.7683	28.5526	28.4147	28.4367	28.5387	28.5444	28.3805	28.5875	28.3677	28.5192	28.6097	28.5038	28.1958
Tb427_110015200	Tb427_110015200.1	http://tritrypdb.org/tritrypdb/processQuestion.do?questionFullName=GeneQuestions.GeneByLocusTag&questionSubmit=Get+Answer&ds_gene_ids_data=Tb427_110015200.1	Tb427_110015200	Tb427_110015200	Tb927.11.1050:mRNA-p1	Tb927.11.1050:mRNA-p1;Tb927.6.2780:mRNA-p1	Brix domain containing protein, putative	11	11	11	36.6	39.646	331	28.4043	28.532	28.4827	28.431	27.9959	28.1379	28.4007	28.0253	27.7588	28.1879	27.3182	27.8438	27.8386	27.8299	27.7433	27.9492	27.2147	27.2109	27.6159	27.6489	27.1043	25.7954	27.0586	26.6559	28.4043	28.532	28.4827	28.431	27.9959	28.1379	28.4007	28.0253	27.7588	28.1879	27.3182	27.8438
Tb427_100155100	Tb427_100155100.1	http://tritrypdb.org/tritrypdb/processQuestion.do?questionFullName=GeneQuestions.GeneByLocusTag&questionSubmit=Get+Answer&ds_gene_ids_data=Tb427_100155100.1	Tb427_100155100	Tb427_100155100	Tb927.10.14680:mRNA-p1	Tb927.10.14680:mRNA-p1	Brix domain containing protein, putative	16	16	16	48.9	35.699	307	29.2867	29.5198	30.0383	29.2732	29.2418	29.0978	29.3262	29.1006	28.5908	28.9371	28.6009	28.7512	28.6489	28.5067	28.5297	28.6428	28.4185	27.9098	28.2715	28.0596	27.7711	28.2241	27.9536	28.0178	29.2867	29.5198	30.0383	29.2732	29.2418	29.0978	29.3262	29.1006	28.5908	28.9371	28.6009	28.7512
Tb427_030028900	Tb427_030028900.1	http://tritrypdb.org/tritrypdb/processQuestion.do?questionFullName=GeneQuestions.GeneByLocusTag&questionSubmit=Get+Answer&ds_gene_ids_data=Tb427_030028900.1	Tb427_030028900	Tb427_030028900	Tb927.3.2830:mRNA-p1	Tb927.3.2830:mRNA-p1	Brix domain containing protein, putative	14	14	14	45.9	41.62	364	28.4234	28.3551	28.1269	28.5529	27.8264	28.245	28.1024	27.7477	28.0313	28.1372	27.6264	27.7405	27.7388	27.8184	27.4091	27.6565	27.325	27.5221	27.7096	27.5054	27.0813	27.1728	27.4289	27.12	28.4234	28.3551	28.1269	28.5529	27.8264	28.245	28.1024	27.7477	28.0313	28.1372	27.6264	27.7405
Tb427_070006300	Tb427_070006300.1	http://tritrypdb.org/tritrypdb/processQuestion.do?questionFullName=GeneQuestions.GeneByLocusTag&questionSubmit=Get+Answer&ds_gene_ids_data=Tb427_070006300.1	Tb427_070006300	Tb427_070006300	Tb927.7.270:mRNA-p1	Tb927.7.270:mRNA-p1	Brix domain containing protein, putative	20	20	20	49.7	41.798	370	30.4162	30.233	30.3797	30.2693	29.9981	29.9568	29.9471	29.5628	29.8555	29.6716	29.427	29.2909	29.5075	29.3112	29.2856	29.3624	29.1898	28.094	28.6857	28.309	27.1451	27.7782	27.0689	26.3176	30.4162	30.233	30.3797	30.2693	29.9981	29.9568	29.9471	29.5628	29.8555	29.6716	29.427	29.2909
Tb427_060032900	Tb427_060032900.1	http://tritrypdb.org/tritrypdb/processQuestion.do?questionFullName=GeneQuestions.GeneByLocusTag&questionSubmit=Get+Answer&ds_gene_ids_data=Tb427_060032900.1	Tb427_060032900	Tb427_060032900	Tb927.6.2780:mRNA-p1	Tb927.6.2780:mRNA-p1;Tb927.11.1050:mRNA-p1	Brix domain containing protein, putative	9	9	9	34.5	33.287	287	29.2028	29.3666	29.0546	29.341	28.6483	28.8784	28.7255	28.631	28.6192	28.4626	28.4501	28.1767	28.2261	28.4162	28.2264	28.2588	28.3651	27.6723	27.9474	28.1775	27.7229	27.9299	27.6522	28.0733	29.2028	29.3666	29.0546	29.341	28.6483	28.8784	28.7255	28.631	28.6192	28.4626	28.4501	28.1767
Tb427_110027700	Tb427_110027700.1	http://tritrypdb.org/tritrypdb/processQuestion.do?questionFullName=GeneQuestions.GeneByLocusTag&questionSubmit=Get+Answer&ds_gene_ids_data=Tb427_110027700.1	Tb427_110027700	Tb427_110027700	Tb927.11.2280:mRNA-p1	Tb927.11.2280:mRNA-p1	BRO1-like domain/ALIX V-shaped domain binding to HIV, putative	29	29	29	41.4	97.146	862	28.968	28.8915	28.6706	28.7743	28.9737	29.2665	29.1999	28.7767	29.2156	29.3667	29.1025	29.0197	28.9261	29.3838	29.0598	29.0729	28.9889	28.5541	28.7904	28.9333	28.5119	28.4101	28.4705	27.8808	28.968	28.8915	28.6706	28.7743	28.9737	29.2665	29.1999	28.7767	29.2156	29.3667	29.1025	29.0197
Tb427_100080200	Tb427_100080200.1	http://tritrypdb.org/tritrypdb/processQuestion.do?questionFullName=GeneQuestions.GeneByLocusTag&questionSubmit=Get+Answer&ds_gene_ids_data=Tb427_100080200.1	Tb427_100080200	Tb427_100080200	Tb927.10.7420:mRNA-p1	Tb927.10.7420:mRNA-p1	Bromodomain, putative	10	10	10	51.8	25.532	224	29.0246	28.9984	28.9097	29.0702	29.3018	28.8859	29.0748	29.5939	29.1673	29.3902	29.3162	29.1269	29.4048	29.2008	29.5469	28.8927	29.6104	29.1563	29.0637	29.154	29.225	28.8422	29.1215	29.5407	29.0246	28.9984	28.9097	29.0702	29.3018	28.8859	29.0748	29.5939	29.1673	29.3902	29.3162	29.1269
Tb427_110109200	Tb427_110109200.1	http://tritrypdb.org/tritrypdb/processQuestion.do?questionFullName=GeneQuestions.GeneByLocusTag&questionSubmit=Get+Answer&ds_gene_ids_data=Tb427_110109200.1	Tb427_110109200	Tb427_110109200	Tb927.11.10070:mRNA-p1	Tb927.11.10070:mRNA-p1	Bromodomain, putative	12	12	12	64.3	25.424	221	30.1694	30.2553	29.9771	29.7421	30.2152	29.9664	29.8535	29.7482	29.8807	29.9708	29.8227	29.8938	30.1815	29.8998	29.769	29.8148	29.7897	29.807	29.7585	29.8675	29.9259	29.7371	29.7459	30.2157	30.1694	30.2553	29.9771	29.7421	30.2152	29.9664	29.8535	29.7482	29.8807	29.9708	29.8227	29.8938
Tb427_110151800	Tb427_110151800.1	http://tritrypdb.org/tritrypdb/processQuestion.do?questionFullName=GeneQuestions.GeneByLocusTag&questionSubmit=Get+Answer&ds_gene_ids_data=Tb427_110151800.1	Tb427_110151800	Tb427_110151800	Tb927.11.13400:mRNA-p1	Tb927.11.13400:mRNA-p1	Bromodomain, putative	27	27	27	41.2	73.774	660	29.1203	29.2877	29.2734	29.1956	29.1902	29.0066	29.0758	29.0114	29.0467	29.0778	28.9003	28.9871	29.2606	29.0717	29.0255	29.0467	29.2196	29.1427	28.9308	29.0384	29.1619	29.2147	29.0789	29.2449	29.1203	29.2877	29.2734	29.1956	29.1902	29.0066	29.0758	29.0114	29.0467	29.0778	28.9003	28.9871
Tb427_070049200	Tb427_070049200.1	http://tritrypdb.org/tritrypdb/processQuestion.do?questionFullName=GeneQuestions.GeneByLocusTag&questionSubmit=Get+Answer&ds_gene_ids_data=Tb427_070049200.1	Tb427_070049200	Tb427_070049200	Tb927.7.4380:mRNA-p1	Tb927.7.4380:mRNA-p1	Bromodomain, putative	4	4	4	5.2	70.224	631	28.9292	28.8824	28.8299	28.9661	29.4611	29.438	29.102			28.9817	29.1517	28.8763	28.9913	29.2076	28.879	29.1271	28.9214	28.7576	29.1368	29.1245	28.4026	28.3701	29.2444		28.9292	28.8824	28.8299	28.9661	29.4611	29.438	29.102	25.1803	24.4354	28.9817	29.1517	28.8763
Tb427_100098000	Tb427_100098000.1	http://tritrypdb.org/tritrypdb/processQuestion.do?questionFullName=GeneQuestions.GeneByLocusTag&questionSubmit=Get+Answer&ds_gene_ids_data=Tb427_100098000.1	Tb427_100098000	Tb427_100098000	Tb927.10.9080:mRNA-p1	Tb927.10.9080:mRNA-p1;Tb927.1.2820:mRNA-p1;Tb927.1.2880:mRNA-p1;Tb927.1.2850:mRNA-p1;Tb927.8.3630:mRNA-p1;Tb927.8.3650:mRNA-p1;Tb927.8.3620:mRNA-p1;Tb11.v5.0766.1-p1	BT1 family, putative	14	14	14	24.2	70.029	640	28.3701	27.7195	27.4566	27.2171	29.0561	29.0714	29.4084	27.8089	29.8006	29.0804	29.2282	28.9854	29.0684	28.9452	29.9126	29.2033	29.2342	29.1107	28.5216	27.8046	28.5596	29.2492	27.8974	26.1314	28.3701	27.7195	27.4566	27.2171	29.0561	29.0714	29.4084	27.8089	29.8006	29.0804	29.2282	28.9854
Tb427_080041300	Tb427_080041300.1	http://tritrypdb.org/tritrypdb/processQuestion.do?questionFullName=GeneQuestions.GeneByLocusTag&questionSubmit=Get+Answer&ds_gene_ids_data=Tb427_080041300.1	Tb427_080041300	Tb427_080041300	Tb927.8.3620:mRNA-p1	Tb927.8.3620:mRNA-p1;Tb927.8.3650:mRNA-p1;Tb927.8.3630:mRNA-p1;Tb11.v5.0766.1-p1;Tb927.10.9080:mRNA-p1;Tb927.1.2880:mRNA-p1;Tb927.1.2820:mRNA-p1;Tb927.1.2850:mRNA-p1	BT1 family, putative	12	2	2	21.8	69.811	632	26.5742	26.3812	25.8886		27.4131	27.4061	26.9326		27.0031	27.0206	26.457	26.9383	27.2746	26.5632	26.29	26.9255	26.3106	25.7724	25.3094		25.2104	25.4411	25.4895	25.5696	26.5742	26.3812	25.8886	24.8103	27.4131	27.4061	26.9326	24.3013	27.0031	27.0206	26.457	26.9383
Tb427_090008000	Tb427_090008000.1	http://tritrypdb.org/tritrypdb/processQuestion.do?questionFullName=GeneQuestions.GeneByLocusTag&questionSubmit=Get+Answer&ds_gene_ids_data=Tb427_090008000.1	Tb427_090008000	Tb427_090008000	Tb927.9.1700:mRNA-p1	Tb927.9.1700:mRNA-p1	BTB/POZ domain containing protein, putative	18	18	18	36.8	67.667	601	28.5296	29.0967	28.4052	28.1957	29.4352	29.5229	29.441	29.2332	29.4719	29.5654	29.2204	29.296	29.4664	29.902	29.5711	29.4993	29.3011	30.0007	29.5426	29.5851	29.5563	29.7436	29.7112	29.7227	28.5296	29.0967	28.4052	28.1957	29.4352	29.5229	29.441	29.2332	29.4719	29.5654	29.2204	29.296
Tb427_100148000	Tb427_100148000.1	http://tritrypdb.org/tritrypdb/processQuestion.do?questionFullName=GeneQuestions.GeneByLocusTag&questionSubmit=Get+Answer&ds_gene_ids_data=Tb427_100148000.1	Tb427_100148000	Tb427_100148000	Tb927.10.13980:mRNA-p1	Tb927.10.13980:mRNA-p1	BTB/POZ domain containing protein, putative	7	7	7	43.8	23.787	208	27.2097	26.9514	26.8984	26.9133	27.572	26.8345	27.4075	27.1102	27.0505	27.0858	27.3183	26.6276	27.1703	27.343	27.5543	27.1972	27.2415	26.7479	27.0147	27.3256	26.9939	26.7498	26.8782	26.8186	27.2097	26.9514	26.8984	26.9133	27.572	26.8345	27.4075	27.1102	27.0505	27.0858	27.3183	26.6276
Tb427_110088300	Tb427_110088300.1	http://tritrypdb.org/tritrypdb/processQuestion.do?questionFullName=GeneQuestions.GeneByLocusTag&questionSubmit=Get+Answer&ds_gene_ids_data=Tb427_110088300.1	Tb427_110088300	Tb427_110088300	Tb927.11.8080:mRNA-p1	Tb927.11.8080:mRNA-p1;Tb927.9.13060:mRNA-p1;Tb927.7.6320:mRNA-p1	BTB/POZ domain containing protein, putative	7	7	7	30.3	34.045	304	26.4106	26.5477	26.5281	26.6251	26.2648	26.5206	26.5386	26.5527	26.8984	26.2437	26.7269	26.5853	26.1418	26.6539	26.7642	26.9162	26.2851	26.4269	26.3309	26.5342	26.6036	26.3956	26.873	26.6775	26.4106	26.5477	26.5281	26.6251	26.2648	26.5206	26.5386	26.5527	26.8984	26.2437	26.7269	26.5853
Tb427_100171300:pseudogene	Tb427_100171300.1	http://tritrypdb.org/tritrypdb/processQuestion.do?questionFullName=GeneQuestions.GeneByLocusTag&questionSubmit=Get+Answer&ds_gene_ids_data=Tb427_100171300.1	Tb427_100171300:pseudogene	Tb427_100171300:pseudogene	Tb11.v5.0396.1-p1	Tb11.v5.0396.1-p1;Tb927.10.16170:mRNA-p1	BTB/POZ domain containing protein, putative	10	10	10	30.6	38.229	340	28.126	28.3967	28.3993	28.779	28.1524	28.1415	28.511	28.5536	28.6078	28.4259	28.3291	28.2	28.0963	28.1338	28.7172	28.3735	28.7954	28.2998	28.7492	28.221	28.2982	28.3522	28.3515	28.0376	28.126	28.3967	28.3993	28.779	28.1524	28.1415	28.511	28.5536	28.6078	28.4259	28.3291	28.2
Tb427_090077800	Tb427_090077800.1	http://tritrypdb.org/tritrypdb/processQuestion.do?questionFullName=GeneQuestions.GeneByLocusTag&questionSubmit=Get+Answer&ds_gene_ids_data=Tb427_090077800.1	Tb427_090077800	Tb427_090077800	Tb927.9.13060:mRNA-p1	Tb927.9.13060:mRNA-p1;Tb927.11.8080:mRNA-p1	BTB/POZ domain containing protein, putative	4	4	4	8.9	57.655	517		25.8896	25.7947	25.0552	24.9581	25.8711	25.7576					24.9882		25.5261				25.8786		25.4012	24.8651				24.78	25.8896	25.7947	25.0552	24.9581	25.8711	25.7576	24.3845	24.5879	24.3628	24.757	24.9882
Tb427_060023300	Tb427_060023300.1	http://tritrypdb.org/tritrypdb/processQuestion.do?questionFullName=GeneQuestions.GeneByLocusTag&questionSubmit=Get+Answer&ds_gene_ids_data=Tb427_060023300.1	Tb427_060023300	Tb427_060023300	Tb927.6.1900:mRNA-p1	Tb927.6.1900:mRNA-p1	Bystin, putative	21	21	21	47.6	52.926	475	31.3552	31.0074	31.0486	31.3294	30.9406	30.9915	30.849	30.9297	30.6984	30.8005	30.699	30.6498	30.7192	30.5587	30.6496	30.8136	30.1203	29.9235	30.1618	30.2091	29.7353	29.8997	29.9273	29.5521	31.3552	31.0074	31.0486	31.3294	30.9406	30.9915	30.849	30.9297	30.6984	30.8005	30.699	30.6498
Tb427_080087100	Tb427_080087100.1	http://tritrypdb.org/tritrypdb/processQuestion.do?questionFullName=GeneQuestions.GeneByLocusTag&questionSubmit=Get+Answer&ds_gene_ids_data=Tb427_080087100.1	Tb427_080087100	Tb427_080087100	Tb927.8.8150:mRNA-p1	Tb927.8.8150:mRNA-p1;Tb927.4.4190:mRNA-p1	C2 domain containing protein, putative	4	3	3	30.8	19.746	182	25.6402				25.8927		26.1499		25.7322	25.9434		25.726	26.2396	25.8863		25.5183	26.6161	25.7685	26.5838	26.054	26.4434		26.4943	26.8362	25.6402	23.9855	24.7557	24.543	25.8927	24.0683	26.1499	24.7845	25.7322	25.9434	24.2114	25.726
Tb427_040023200	Tb427_040023200.1	http://tritrypdb.org/tritrypdb/processQuestion.do?questionFullName=GeneQuestions.GeneByLocusTag&questionSubmit=Get+Answer&ds_gene_ids_data=Tb427_040023200.1	Tb427_040023200	Tb427_040023200	Tb927.4.2080:mRNA-p1	Tb927.4.2080:mRNA-p1;Tb927.10.9700:mRNA-p1	C2 domain containing protein, putative	60	60	60	58.5	104.82	906	32.533	32.5453	32.3482	32.0735	32.5577	32.6416	32.6066	32.4303	32.5141	32.4524	32.3554	32.2045	32.6549	32.6692	32.5504	32.2102	32.912	32.7572	32.3546	32.5423	32.7838	32.8207	32.6757	32.7874	32.533	32.5453	32.3482	32.0735	32.5577	32.6416	32.6066	32.4303	32.5141	32.4524	32.3554	32.2045
Tb427_100056700	Tb427_100056700.1	http://tritrypdb.org/tritrypdb/processQuestion.do?questionFullName=GeneQuestions.GeneByLocusTag&questionSubmit=Get+Answer&ds_gene_ids_data=Tb427_100056700.1	Tb427_100056700	Tb427_100056700	Tb927.10.5260:mRNA-p1	Tb927.10.5260:mRNA-p1;Tb11.v5.0497.1-p1;Tb11.v5.0250.1-p1	C2 domain containing protein, putative	14	14	14	14.1	125.19	1135	27.5326	27.6948	27.0252	27.3975	27.3803	27.6577	27.49	27.824	27.5853	27.6295	27.2267	27.1179	27.5882	27.7364	27.9253	27.5555	27.967	27.9681	27.4639	27.3608	27.4842	28.1106	27.7264	27.505	27.5326	27.6948	27.0252	27.3975	27.3803	27.6577	27.49	27.824	27.5853	27.6295	27.2267	27.1179
Tb427_110046800	Tb427_110046800.1	http://tritrypdb.org/tritrypdb/processQuestion.do?questionFullName=GeneQuestions.GeneByLocusTag&questionSubmit=Get+Answer&ds_gene_ids_data=Tb427_110046800.1	Tb427_110046800	Tb427_110046800	Tb927.11.4160:mRNA-p1	Tb927.11.4160:mRNA-p1;Tb927.4.4190:mRNA-p1	C2 domain containing protein, putative	24	24	24	23.1	136.18	1235	28.0024	28.1645	27.9047	28.2908	28.0212	28.2251	27.8967	28.1009	28.2032	27.8266	27.7818	27.749	27.7551	28.2057	28.0815	28.0838	27.9495	27.8987	27.8492	27.9509	27.3794	28.2856	27.7486	27.6874	28.0024	28.1645	27.9047	28.2908	28.0212	28.2251	27.8967	28.1009	28.2032	27.8266	27.7818	27.749
Tb427_110124800	Tb427_110124800.1	http://tritrypdb.org/tritrypdb/processQuestion.do?questionFullName=GeneQuestions.GeneByLocusTag&questionSubmit=Get+Answer&ds_gene_ids_data=Tb427_110124800.1	Tb427_110124800	Tb427_110124800	Tb11.01.2730.1-p1	Tb11.01.2730.1-p1;Tb927.10.9700:mRNA-p1;Tb927.10.9690:mRNA-p1;Tb11.v5.0773.1-p1	C2 domain containing protein, putative	18	18	18	15.2	269.89	2427	27.2009	26.7191	27.2011		27.1754	27.1226	26.8077		27.1873	27.5397	27.1864	27.066	27.6563	27.6954	27.2142	27.401	27.5628	28.1499	27.913	27.7245	27.7773	28.2787	27.6676	28.0438	27.2009	26.7191	27.2011	24.6144	27.1754	27.1226	26.8077	24.0287	27.1873	27.5397	27.1864	27.066
Tb427_040044600	Tb427_040044600.1	http://tritrypdb.org/tritrypdb/processQuestion.do?questionFullName=GeneQuestions.GeneByLocusTag&questionSubmit=Get+Answer&ds_gene_ids_data=Tb427_040044600.1	Tb427_040044600	Tb427_040044600	Tb927.4.4190:mRNA-p1	Tb927.4.4190:mRNA-p1;Tb927.8.8150:mRNA-p1;Tb927.11.4160:mRNA-p1	C2 domain containing protein, putative	5	5	4	43.3	17.353	157	26.5905	26.9859	27.0835		26.925	26.537	27.0057			26.5417			26.7347		26.7671						26.9063	26.7159	27.0098		26.5905	26.9859	27.0835	25.0631	26.925	26.537	27.0057	24.632	24.7364	26.5417	24.1946	24.9486
Tb427_100103800	Tb427_100103800.1	http://tritrypdb.org/tritrypdb/processQuestion.do?questionFullName=GeneQuestions.GeneByLocusTag&questionSubmit=Get+Answer&ds_gene_ids_data=Tb427_100103800.1	Tb427_100103800	Tb427_100103800	Tb927.10.9700:mRNA-p1	Tb927.10.9700:mRNA-p1;Tb11.v5.0773.1-p1;Tb11.01.2730.1-p1;Tb927.10.9690:mRNA-p1;Tb927.4.2080:mRNA-p1	C2 domain containing protein, putative	25	25	25	26.2	132.53	1181	28.0725	27.8011	28.0068	28.2072	27.8085	26.6698	27.5672	26.0885	27.5593	27.3043	27.4822	27.2689	27.9889	28.0993	27.8623	27.613	27.8804	28.4626	28.0074	27.7208	28.4235	28.7095	28.2615	28.4364	28.0725	27.8011	28.0068	28.2072	27.8085	26.6698	27.5672	26.0885	27.5593	27.3043	27.4822	27.2689
Tb427_030058800:pseudogene	Tb427_030058800.1	http://tritrypdb.org/tritrypdb/processQuestion.do?questionFullName=GeneQuestions.GeneByLocusTag&questionSubmit=Get+Answer&ds_gene_ids_data=Tb427_030058800.1	Tb427_030058800:pseudogene	Tb427_030058800:pseudogene	Tb927.3.5530:mRNA-p1	Tb927.3.5530:mRNA-p1	C2 domain in Dock180 and Zizimin proteins, putative	71	71	70	55.4	302.68	2661	31.4333	31.4471	31.2482	31.0549	31.24	31.1234	31.0434	30.6974	31.0685	31.0304	30.92	30.8077	31.2454	31.1833	31.1156	31.0552	31.1383	31.9822	31.2336	31.191	31.4574	31.9565	31.2621	31.1114	31.4333	31.4471	31.2482	31.0549	31.24	31.1234	31.0434	30.6974	31.0685	31.0304	30.92	30.8077
Tb427_070058700	Tb427_070058700.1	http://tritrypdb.org/tritrypdb/processQuestion.do?questionFullName=GeneQuestions.GeneByLocusTag&questionSubmit=Get+Answer&ds_gene_ids_data=Tb427_070058700.1	Tb427_070058700	Tb427_070058700	Tb927.7.5300:mRNA-p1	Tb927.7.5300:mRNA-p1;Tb927.11.8100:mRNA-p1	C2 domain/Ankyrin repeats (3 copies)/Ankyrin repeat, putative	17	17	17	29.7	72.842	707	28.8284	29.1483	29.2296	28.8522	28.8877	29.331	29.3856	28.5001	29.0048	29.2075	29.1477	29.2036	29.0483	29.2075	29.3277	29.1195	28.9945	29.0694	29.2481	29.2085	29.1306	29.2784	29.3872	29.033	28.8284	29.1483	29.2296	28.8522	28.8877	29.331	29.3856	28.5001	29.0048	29.2075	29.1477	29.2036
Tb427_060040300	Tb427_060040300.1	http://tritrypdb.org/tritrypdb/processQuestion.do?questionFullName=GeneQuestions.GeneByLocusTag&questionSubmit=Get+Answer&ds_gene_ids_data=Tb427_060040300.1	Tb427_060040300	Tb427_060040300	Tb927.6.3540:mRNA-p1	Tb927.6.3540:mRNA-p1	C2H2 type zinc-finger (2 copies), putative	14	14	14	45.1	41.597	366	28.3068	28.3365	28.5989	28.1893	28.2571	28.1974	28.2231	28.285	28.1933	28.004	28.035	28.1751	27.8685	27.8436	27.7411	27.9462	27.8946	27.5953	27.7486	27.5541	27.1515	27.4365	27.979	26.8993	28.3068	28.3365	28.5989	28.1893	28.2571	28.1974	28.2231	28.285	28.1933	28.004	28.035	28.1751
Tb427_060037600	Tb427_060037600.1	http://tritrypdb.org/tritrypdb/processQuestion.do?questionFullName=GeneQuestions.GeneByLocusTag&questionSubmit=Get+Answer&ds_gene_ids_data=Tb427_060037600.1	Tb427_060037600	Tb427_060037600	Tb927.6.3250:mRNA-p1	Tb927.6.3250:mRNA-p1	C2H2 type zinc-finger (2 copies), putative	7	7	7	28.4	34.728	317	29.5867	29.0141	29.3991	29.5489	29.4125	28.8433	29.1777	28.8483	28.7471	28.803	29.1685	29.1996	29.182	28.5041	28.9396	29.0815	28.6251	28.253	28.4443	28.6488	28.4576	27.913	28.5611	28.3531	29.5867	29.0141	29.3991	29.5489	29.4125	28.8433	29.1777	28.8483	28.7471	28.803	29.1685	29.1996
Tb427_090050100	Tb427_090050100.1	http://tritrypdb.org/tritrypdb/processQuestion.do?questionFullName=GeneQuestions.GeneByLocusTag&questionSubmit=Get+Answer&ds_gene_ids_data=Tb427_090050100.1	Tb427_090050100	Tb427_090050100	Tb927.9.8950:mRNA-p1	Tb927.9.8950:mRNA-p1	CAAX prenyl protease N-terminal, five membrane helices/Peptidase family M48, putative	20	20	20	44.5	48.812	427	31.7294	31.4576	31.7165	31.2771	31.9645	31.5251	31.7844	31.8139	32.0939	31.8733	31.9275	32.0041	31.9609	31.9123	32.0999	32.1109	32.1229	32.5572	32.3574	31.9911	32.4845	32.3454	32.4859	32.5108	31.7294	31.4576	31.7165	31.2771	31.9645	31.5251	31.7844	31.8139	32.0939	31.8733	31.9275	32.0041
Tb427_110132600	Tb427_110132600.1	http://tritrypdb.org/tritrypdb/processQuestion.do?questionFullName=GeneQuestions.GeneByLocusTag&questionSubmit=Get+Answer&ds_gene_ids_data=Tb427_110132600.1	Tb427_110132600	Tb427_110132600	Tb927.11.11610:mRNA-p1	Tb927.11.11610:mRNA-p1	Cactus-binding C-terminus of cactin protein, putative	11	11	11	24.7	64.618	572	27.1527	27.2669	27.3661	27.7812	27.0311	27.2904	27.2162	27.1757	27.3933	27.294	27.3217	27.1381	27.1698	27.366	27.6967	27.4366	27.3061	27.4047	27.2421	27.5105	27.3391	27.3962	27.0925	27.2289	27.1527	27.2669	27.3661	27.7812	27.0311	27.2904	27.2162	27.1757	27.3933	27.294	27.3217	27.1381
Tb427_090080900	Tb427_090080900.1	http://tritrypdb.org/tritrypdb/processQuestion.do?questionFullName=GeneQuestions.GeneByLocusTag&questionSubmit=Get+Answer&ds_gene_ids_data=Tb427_090080900.1	Tb427_090080900	Tb427_090080900	Tb927.9.13510:mRNA-p1	Tb927.9.13510:mRNA-p1;Tb11.v5.0807.1-p1;Tb927.8.2850:mRNA-p1;Tb927.10.8360.1:mRNA-p1;Tb927.10.8360.2:mRNA-p1	CAF1 family ribonuclease, putative	21	21	21	41.9	70.841	623	30.7024	30.4038	30.3566	30.3182	30.8431	30.6647	30.8526	30.8997	30.9651	30.8432	30.867	30.8847	31.0253	31.2266	31.1607	31.0376	31.3419	31.0782	30.9548	31.1102	31.2461	30.9927	31.3585	31.3864	30.7024	30.4038	30.3566	30.3182	30.8431	30.6647	30.8526	30.8997	30.9651	30.8432	30.867	30.8847
Tb427_060009400:pseudogene	Tb427_060009400.1	http://tritrypdb.org/tritrypdb/processQuestion.do?questionFullName=GeneQuestions.GeneByLocusTag&questionSubmit=Get+Answer&ds_gene_ids_data=Tb427_060009400.1	Tb427_060009400:pseudogene	Tb427_060009400:pseudogene	Tb927.6.600:mRNA-p1	Tb927.6.600:mRNA-p1;Tb927.10.8360.1:mRNA-p1;Tb927.10.8360.2:mRNA-p1	CAF1 family ribonuclease, putative	16	16	16	63.2	38.863	351	30.7949	31.019	30.7205	30.4	31.1903	30.8223	30.8588	30.8534	30.9048	30.6489	30.5442	30.2445	31.0229	30.8131	30.5963	30.5177	30.5775	30.3054	30.1796	30.4721	30.2379	30.21	30.1218	30.0663	30.7949	31.019	30.7205	30.4	31.1903	30.8223	30.8588	30.8534	30.9048	30.6489	30.5442	30.2445
Tb427_080031900	Tb427_080031900.1	http://tritrypdb.org/tritrypdb/processQuestion.do?questionFullName=GeneQuestions.GeneByLocusTag&questionSubmit=Get+Answer&ds_gene_ids_data=Tb427_080031900.1	Tb427_080031900	Tb427_080031900	Tb927.8.2850:mRNA-p1	Tb927.8.2850:mRNA-p1;Tb927.10.8360.2:mRNA-p1;Tb11.v5.0807.1-p1;Tb927.9.13510:mRNA-p1;Tb927.10.8360.1:mRNA-p1	CAF1 family ribonuclease, putative	24	24	24	49.8	65.248	586	28.6479	28.6897	28.6026	28.877	28.7155	28.5216	28.6458	28.5552	29.0375	28.8679	28.9382	29.0172	29.0796	29.1251	28.8334	29.1496	29.1473	29.2266	29.2321	29.4219	29.1751	28.9746	29.3569	29.7536	28.6479	28.6897	28.6026	28.877	28.7155	28.5216	28.6458	28.5552	29.0375	28.8679	28.9382	29.0172
Tb427_100090300	Tb427_100090300.1	http://tritrypdb.org/tritrypdb/processQuestion.do?questionFullName=GeneQuestions.GeneByLocusTag&questionSubmit=Get+Answer&ds_gene_ids_data=Tb427_100090300.1	Tb427_100090300	Tb427_100090300	Tb927.10.8360.2:mRNA-p1	Tb927.10.8360.2:mRNA-p1;Tb927.10.8360.1:mRNA-p1;Tb927.8.2850:mRNA-p1;Tb11.v5.0807.1-p1;Tb927.9.13510:mRNA-p1;Tb927.6.600:mRNA-p1	CAF1 family ribonuclease, putative	16	16	16	38.9	58.47	509	28.9155	28.7036	28.8854	28.7379	28.5547	28.6125	28.3874	28.959	28.7992	28.7411	29.0399	29.0322	28.7906	28.6772	28.6731	28.7665	28.8046	28.5552	28.6948	29.1625	28.9078	28.9777	28.7873	28.4674	28.9155	28.7036	28.8854	28.7379	28.5547	28.6125	28.3874	28.959	28.7992	28.7411	29.0399	29.0322
Tb427_110160800	Tb427_110160800.1	http://tritrypdb.org/tritrypdb/processQuestion.do?questionFullName=GeneQuestions.GeneByLocusTag&questionSubmit=Get+Answer&ds_gene_ids_data=Tb427_110160800.1	Tb427_110160800	Tb427_110160800	Tb927.11.14290:mRNA-p1	Tb927.11.14290:mRNA-p1	Calcineurin-like phosphoesterase superfamily domain containing protein, putative	17	17	17	79.6	25.075	226	28.5545	28.365	27.9127	28.3173	28.8872	28.7036	28.6283	28.6738	29.2584	28.8531	28.7184	28.8291	29.4216	29.0853	28.9223	28.8376	29.1358	29.1076	28.986	28.9902	28.9664	28.9253	29.0595	29.4328	28.5545	28.365	27.9127	28.3173	28.8872	28.7036	28.6283	28.6738	29.2584	28.8531	28.7184	28.8291
Tb427_080086100	Tb427_080086100.1;Tb427_040046400.1	http://tritrypdb.org/tritrypdb/processQuestion.do?questionFullName=GeneQuestions.GeneByLocusTag&questionSubmit=Get+Answer&ds_gene_ids_data=Tb427_080086100.1,Tb427_040046400.1	Tb427_080086100;Tb427_040046400	Tb427_080086100	Tb927.8.8040:mRNA-p1;Tb927.4.4330:mRNA-p1	Tb927.8.8040:mRNA-p1;Tb927.4.4330:mRNA-p1;Tb927.6.640:mRNA-p1;Tb927.6.4630:mRNA-p1	Calcineurin-like phosphoesterase superfamily domain/Calcineurin-like phosphoesterase, putative	13	13	13	67.9	27.124	252	29.118	29.0023	28.8891	28.7833	28.6072	28.8431	28.797	28.4709	28.7305	28.8721	28.7231	28.5333	29.0015	28.6955	28.7889	28.9559	29.0366	28.5767	28.6431	28.8433	28.7668	28.464	28.7105	28.9207	29.118	29.0023	28.8891	28.7833	28.6072	28.8431	28.797	28.4709	28.7305	28.8721	28.7231	28.5333
Tb427_040013000	Tb427_040013000.1	http://tritrypdb.org/tritrypdb/processQuestion.do?questionFullName=GeneQuestions.GeneByLocusTag&questionSubmit=Get+Answer&ds_gene_ids_data=Tb427_040013000.1	Tb427_040013000	Tb427_040013000	Tb927.4.1110:mRNA-p1	Tb927.4.1110:mRNA-p1;Tb927.4.1120:mRNA-p1	Calcineurin-like phosphoesterase, putative	9	9	9	21.8	50.999	459					26.4309	26.6525	26.5462		26.7761	26.833	26.1723	26.4068	27.0668	27.3822	26.6487	26.8748		27.0887	26.7783	26.9834	27.1443	27.2876	27.6014	27.3993	24.4641	24.1366	25.0547	24.9889	26.4309	26.6525	26.5462	25.1275	26.7761	26.833	26.1723	26.4068
Tb427_060009800	Tb427_060009800.1	http://tritrypdb.org/tritrypdb/processQuestion.do?questionFullName=GeneQuestions.GeneByLocusTag&questionSubmit=Get+Answer&ds_gene_ids_data=Tb427_060009800.1	Tb427_060009800	Tb427_060009800	Tb927.6.640:mRNA-p1	Tb927.6.640:mRNA-p1;Tb927.8.8040:mRNA-p1;Tb927.4.4330:mRNA-p1	Calcineurin-like phosphoesterase, putative	29	29	29	48.3	79.193	735	30.4032	30.3716	30.3126	30.2454	30.7377	30.7962	30.7851	30.6563	30.6156	30.3169	30.379	30.3938	30.45	30.294	30.461	30.2668	30.4756	29.8736	30.209	29.7947	29.5445	29.7339	29.4061	29.1802	30.4032	30.3716	30.3126	30.2454	30.7377	30.7962	30.7851	30.6563	30.6156	30.3169	30.379	30.3938
Tb427_100109800	Tb427_100109800.1	http://tritrypdb.org/tritrypdb/processQuestion.do?questionFullName=GeneQuestions.GeneByLocusTag&questionSubmit=Get+Answer&ds_gene_ids_data=Tb427_100109800.1	Tb427_100109800	Tb427_100109800	Tb927.10.10310:mRNA-p1	Tb927.10.10310:mRNA-p1;Tb11.v5.0446.1-p1	Calcineurin-like phosphoesterase, putative	8	8	8	22.5	53.135	481	26.6741	26.4735	26.2064	26.4906	26.8072	27.0783	26.8463	26.5518	26.6273	26.9072	26.5488	26.5314	27.0569	27.4979	26.7757	26.6649	26.465	27.6679	26.5622	27.1585	26.9293	26.7802	26.8497	27.0118	26.6741	26.4735	26.2064	26.4906	26.8072	27.0783	26.8463	26.5518	26.6273	26.9072	26.5488	26.5314
Tb427_100070000	Tb427_100070000.1	http://tritrypdb.org/tritrypdb/processQuestion.do?questionFullName=GeneQuestions.GeneByLocusTag&questionSubmit=Get+Answer&ds_gene_ids_data=Tb427_100070000.1	Tb427_100070000	Tb427_100070000	Tb927.10.6540:mRNA-p1	Tb927.10.6540:mRNA-p1;Tb927.3.1240:mRNA-p1;Tb927.4.1870:mRNA-p1;Tb927.11.11940:mRNA-p1;Tb927.11.8090:mRNA-p1;Tb927.11.16970:mRNA-p1;Tb927.8.7390:mRNA-p1;Tb927.4.5030:mRNA-p1;Tb927.4.3640:mRNA-p1;Tb927.4.3620:mRNA-p1;Tb927.4.3630:mRNA-p1;Tb927.4.3560:mRNA-p1;Tb927.10.13670:mRNA-p1;Tb927.8.1130:mRNA-p1;Tb927.1.4050:mRNA-p1;Tb927.5.4380:mRNA-p1;Tb05.5K5.30:mRNA-p1;Tb927.11.12480:mRNA-p1;Tb927.9.1540…	Calcineurin-like phosphoesterase, putative	5	5	5	12.2	68.694	637	25.9407	26.2079	25.9663		26.0946	26.351	26.2145	25.9049	26.0317	26.5199	25.9632	25.6474	26.3768	26.5348	26.1171	25.9881	26.1599	25.8655	25.7999	26.0606	25.4215		25.7549	25.2688	25.9407	26.2079	25.9663	25.1025	26.0946	26.351	26.2145	25.9049	26.0317	26.5199	25.9632	25.6474
Tb427_110135900	Tb427_110135900.1	http://tritrypdb.org/tritrypdb/processQuestion.do?questionFullName=GeneQuestions.GeneByLocusTag&questionSubmit=Get+Answer&ds_gene_ids_data=Tb427_110135900.1	Tb427_110135900	Tb427_110135900	Tb927.11.11940:mRNA-p1	Tb927.11.11940:mRNA-p1;Tb927.3.1240:mRNA-p1;Tb927.11.16970:mRNA-p1;Tb927.4.5030:mRNA-p1;Tb927.8.7390:mRNA-p1;Tb927.11.8090:mRNA-p1;Tb927.4.3560:mRNA-p1;Tb927.4.3620:mRNA-p1;Tb927.4.3630:mRNA-p1;Tb927.4.3640:mRNA-p1;Tb927.4.3610:mRNA-p1;Tb927.10.13670:mRNA-p1;Tb927.10.6540:mRNA-p1;Tb927.9.1540:mRNA-p1;Tb927.4.1870:mRNA-p1;Tb927.10.6460:mRNA-p1;Tb927.1.4050:mRNA-p1;Tb927.8.1130:mRNA-p1;Tb927.5.4380…	Calcineurin-like phosphoesterase, putative	11	11	11	39.5	34.56	306	27.4868	27.8334	27.9015	27.5563	27.8862	27.9005	27.8039	27.6591	27.7627	27.8293	27.2907	27.6575	27.736	27.9461	27.8948	28.1424	27.5329	27.8164	27.6716	27.6174	27.6676	27.5515	27.3766	27.7059	27.4868	27.8334	27.9015	27.5563	27.8862	27.9005	27.8039	27.6591	27.7627	27.8293	27.2907	27.6575
Tb427_100069000	Tb427_100069000.1	http://tritrypdb.org/tritrypdb/processQuestion.do?questionFullName=GeneQuestions.GeneByLocusTag&questionSubmit=Get+Answer&ds_gene_ids_data=Tb427_100069000.1	Tb427_100069000	Tb427_100069000	Tb927.10.6460:mRNA-p1	Tb927.10.6460:mRNA-p1;Tb927.9.1540:mRNA-p1;Tb927.3.1240:mRNA-p1;Tb927.11.8090:mRNA-p1;Tb927.10.13670:mRNA-p1;Tb927.4.5030:mRNA-p1;Tb927.8.7390:mRNA-p1;Tb927.4.3630:mRNA-p1;Tb927.4.3640:mRNA-p1;Tb927.4.3620:mRNA-p1;Tb927.11.16970:mRNA-p1;Tb927.11.11940:mRNA-p1;Tb927.4.3560:mRNA-p1;Tb927.4.3610:mRNA-p1;Tb927.4.1870:mRNA-p1;Tb927.1.4050:mRNA-p1;Tb927.5.4380:mRNA-p1;Tb05.5K5.30:mRNA-p1;Tb927.11.4990:…	Calcineurin-like phosphoesterase, putative	6	6	6	20.5	44.038	391									25.8998		26.0699				25.8926						26.6706	25.551			24.3636	24.2478	24.7492	24.6627	24.5915	24.7858	24.7583	24.2885	25.8998	24.4478	26.0699	25.1372
Tb427_010028100	Tb427_010028100.1	http://tritrypdb.org/tritrypdb/processQuestion.do?questionFullName=GeneQuestions.GeneByLocusTag&questionSubmit=Get+Answer&ds_gene_ids_data=Tb427_010028100.1	Tb427_010028100	Tb427_010028100	Tb927.1.4050:mRNA-p1	Tb927.1.4050:mRNA-p1;Tb927.8.1130:mRNA-p1;Tb927.10.13670:mRNA-p1;Tb927.4.3630:mRNA-p1;Tb927.4.3640:mRNA-p1;Tb927.3.1240:mRNA-p1;Tb927.4.3560:mRNA-p1;Tb927.4.3620:mRNA-p1;Tb927.11.8090:mRNA-p1;Tb927.11.11940:mRNA-p1;Tb927.11.16970:mRNA-p1;Tb927.4.5030:mRNA-p1;Tb927.8.7390:mRNA-p1;Tb927.11.4990:mRNA-p1;Tb927.4.3610:mRNA-p1;Tb927.4.1870:mRNA-p1;Tb927.9.1540:mRNA-p1;Tb927.10.6540:mRNA-p1;Tb927.10.646…	Calcineurin-like phosphoesterase, putative	40	40	40	48.4	105.67	925	31.5578	31.6416	31.4653	31.5744	31.6389	31.6998	31.6877	31.5523	31.4376	31.6185	31.4808	31.4025	31.7266	31.7205	31.6007	31.64	31.6441	31.5533	31.6022	31.7242	31.6444	31.5081	31.8753	31.7317	31.5578	31.6416	31.4653	31.5744	31.6389	31.6998	31.6877	31.5523	31.4376	31.6185	31.4808	31.4025
Tb427_110141600	Tb427_110141600.1	http://tritrypdb.org/tritrypdb/processQuestion.do?questionFullName=GeneQuestions.GeneByLocusTag&questionSubmit=Get+Answer&ds_gene_ids_data=Tb427_110141600.1	Tb427_110141600	Tb427_110141600	Tb927.11.12480:mRNA-p1	Tb927.11.12480:mRNA-p1;Tb927.5.4380:mRNA-p1;Tb05.5K5.30:mRNA-p1;Tb927.11.4990:mRNA-p1;Tb927.11.8090:mRNA-p1;Tb927.3.1240:mRNA-p1;Tb927.11.11940:mRNA-p1;Tb927.4.1870:mRNA-p1;Tb927.4.3620:mRNA-p1;Tb927.11.16970:mRNA-p1;Tb927.4.3630:mRNA-p1;Tb927.4.3640:mRNA-p1;Tb927.10.6540:mRNA-p1;Tb927.4.3560:mRNA-p1;Tb927.1.4050:mRNA-p1;Tb927.4.5030:mRNA-p1;Tb927.8.7390:mRNA-p1;Tb927.10.13670:mRNA-p1;Tb927.8.113…	Calcineurin-like phosphoesterase, putative	20	20	20	35.8	69.772	637	29.3735	29.6315	29.3037	29.2906	29.5076	29.5773	29.5152	29.2855	29.2958	29.6353	29.5528	29.346	29.5625	29.6511	29.6294	29.3678	29.2282	29.3398	29.0253	29.6769	29.2258	29.4146	29.1755	29.4699	29.3735	29.6315	29.3037	29.2906	29.5076	29.5773	29.5152	29.2855	29.2958	29.6353	29.5528	29.346
Tb427_110189600	Tb427_110189600.1	http://tritrypdb.org/tritrypdb/processQuestion.do?questionFullName=GeneQuestions.GeneByLocusTag&questionSubmit=Get+Answer&ds_gene_ids_data=Tb427_110189600.1	Tb427_110189600	Tb427_110189600	Tb927.11.16970:mRNA-p1	Tb927.11.16970:mRNA-p1;Tb927.3.1240:mRNA-p1;Tb927.11.11940:mRNA-p1;Tb927.11.8090:mRNA-p1;Tb927.4.3620:mRNA-p1;Tb927.4.3640:mRNA-p1;Tb927.4.3630:mRNA-p1;Tb927.4.3560:mRNA-p1;Tb927.8.7390:mRNA-p1;Tb927.4.5030:mRNA-p1;Tb927.4.3610:mRNA-p1;Tb927.9.1540:mRNA-p1;Tb927.10.6540:mRNA-p1;Tb927.10.13670:mRNA-p1;Tb927.10.6460:mRNA-p1;Tb927.4.1870:mRNA-p1;Tb927.1.4050:mRNA-p1;Tb927.5.4380:mRNA-p1;Tb05.5K5.30:…	Calcineurin-like phosphoesterase, putative	18	18	18	78.2	34.432	303	30.9931	31.0185	30.6411	30.6472	30.7749	30.8452	30.7386	30.8681	30.8656	30.7026	30.6065	30.564	30.8033	30.843	30.6714	30.7543	30.8756	30.4191	30.72	30.8546	30.5835	30.7662	30.7364	30.6126	30.9931	31.0185	30.6411	30.6472	30.7749	30.8452	30.7386	30.8681	30.8656	30.7026	30.6065	30.564
Tb427_060051500	Tb427_060051500.1	http://tritrypdb.org/tritrypdb/processQuestion.do?questionFullName=GeneQuestions.GeneByLocusTag&questionSubmit=Get+Answer&ds_gene_ids_data=Tb427_060051500.1	Tb427_060051500	Tb427_060051500	Tb927.6.4630:mRNA-p1	Tb927.6.4630:mRNA-p1;Tb927.6.750:mRNA-p1;Tb927.1.4050:mRNA-p1;Tb927.4.4330:mRNA-p1	Calcineurin-like phosphoesterase, putative	12	12	12	48.4	39.848	366	29.1715	29.0365	29.1078	29.1307	29.0957	29.0896	28.9684	29.2011	29.6751	29.1589	29.3143	29.2245	29.3956	29.591	29.2569	29.5174	29.7202	29.7071	29.4343	29.7915	29.5596	29.563	29.657	30.2808	29.1715	29.0365	29.1078	29.1307	29.0957	29.0896	28.9684	29.2011	29.6751	29.1589	29.3143	29.2245
Tb427_040021000	Tb427_040021000.1	http://tritrypdb.org/tritrypdb/processQuestion.do?questionFullName=GeneQuestions.GeneByLocusTag&questionSubmit=Get+Answer&ds_gene_ids_data=Tb427_040021000.1	Tb427_040021000	Tb427_040021000	Tb927.4.1870:mRNA-p1	Tb927.4.1870:mRNA-p1;Tb927.3.1240:mRNA-p1;Tb927.10.6540:mRNA-p1;Tb927.11.8090:mRNA-p1;Tb927.11.11940:mRNA-p1;Tb927.8.7390:mRNA-p1;Tb927.4.5030:mRNA-p1;Tb927.4.3620:mRNA-p1;Tb927.4.3630:mRNA-p1;Tb927.4.3640:mRNA-p1;Tb927.11.16970:mRNA-p1;Tb927.4.3560:mRNA-p1;Tb927.10.13670:mRNA-p1;Tb927.1.4050:mRNA-p1;Tb927.10.6460:mRNA-p1;Tb927.9.1540:mRNA-p1;Tb927.11.12480:mRNA-p1;Tb927.4.3610:mRNA-p1;Tb927.11.4…	Calcineurin-like phosphoesterase, putative	7	7	7	18.3	46.866	426	29.7544	29.5953	29.473	28.3939	29.6451	29.2374	29.4541	28.6045	29.8072	29.3103	29.436	29.1011	29.5068	29.7504	29.553	29.3556	29.986	29.6212	29.3706	29.5269	29.5553	29.6398	29.0911	29.7705	29.7544	29.5953	29.473	28.3939	29.6451	29.2374	29.4541	28.6045	29.8072	29.3103	29.436	29.1011
Tb427_030012100	Tb427_030012100.1	http://tritrypdb.org/tritrypdb/processQuestion.do?questionFullName=GeneQuestions.GeneByLocusTag&questionSubmit=Get+Answer&ds_gene_ids_data=Tb427_030012100.1	Tb427_030012100	Tb427_030012100	Tb927.3.1240:mRNA-p1	Tb927.3.1240:mRNA-p1;Tb927.11.11940:mRNA-p1;Tb927.11.16970:mRNA-p1;Tb927.11.8090:mRNA-p1;Tb927.8.7390:mRNA-p1;Tb927.4.5030:mRNA-p1;Tb927.4.3560:mRNA-p1;Tb927.4.3620:mRNA-p1;Tb927.4.3630:mRNA-p1;Tb927.4.3640:mRNA-p1;Tb927.10.13670:mRNA-p1;Tb927.4.3610:mRNA-p1;Tb927.9.1540:mRNA-p1;Tb927.4.1870:mRNA-p1;Tb927.10.6540:mRNA-p1;Tb927.10.6460:mRNA-p1;Tb927.1.4050:mRNA-p1;Tb927.5.4380:mRNA-p1;Tb05.5K5.30:…	Calcineurin-like phosphoesterase, putative	11	11	11	52	36.243	323	29.8024	29.9163	29.4813	29.4998	29.666	29.7452	29.3843	29.5829	29.3838	29.3842	29.3203	29.3543	29.3444	29.3254	29.3592	29.5695	29.121	29.1804	29.1819	29.3281	29.0245	29.4803	29.2657	29.1744	29.8024	29.9163	29.4813	29.4998	29.666	29.7452	29.3843	29.5829	29.3838	29.3842	29.3203	29.3543
Tb427_060010900	Tb427_060010900.1	http://tritrypdb.org/tritrypdb/processQuestion.do?questionFullName=GeneQuestions.GeneByLocusTag&questionSubmit=Get+Answer&ds_gene_ids_data=Tb427_060010900.1	Tb427_060010900	Tb427_060010900	Tb927.6.750:mRNA-p1	Tb927.6.750:mRNA-p1;Tb927.6.4630:mRNA-p1	Calcineurin-like phosphoesterase, putative	4	4	4	12.6	41.647	374	26.2138	26.2817	25.9797	26.0801	25.9865	26.2544	26.0954	25.474	25.788	26.0793			25.9644	26.0536	25.7953	25.5122	25.2548	25.9015			25.5653	25.5477		25.5969	26.2138	26.2817	25.9797	26.0801	25.9865	26.2544	26.0954	25.474	25.788	26.0793	24.3575	24.3365
Tb427_040038400	Tb427_040038400.1;Tb427_040038900.1	http://tritrypdb.org/tritrypdb/processQuestion.do?questionFullName=GeneQuestions.GeneByLocusTag&questionSubmit=Get+Answer&ds_gene_ids_data=Tb427_040038400.1,Tb427_040038900.1	Tb427_040038400;Tb427_040038900	Tb427_040038400	Tb927.4.3560:mRNA-p1;Tb927.4.3610:mRNA-p1	Tb927.4.3560:mRNA-p1;Tb927.4.3610:mRNA-p1;Tb927.11.8090:mRNA-p1;Tb927.4.3620:mRNA-p1;Tb927.4.3640:mRNA-p1;Tb927.4.3630:mRNA-p1;Tb927.8.7390:mRNA-p1;Tb927.4.5030:mRNA-p1;Tb927.3.1240:mRNA-p1;Tb927.11.16970:mRNA-p1;Tb927.11.11940:mRNA-p1;Tb927.10.13670:mRNA-p1;Tb927.9.1540:mRNA-p1;Tb927.1.4050:mRNA-p1;Tb927.10.6460:mRNA-p1;Tb927.10.6540:mRNA-p1;Tb927.8.1130:mRNA-p1;Tb927.4.1870:mRNA-p1;Tb927.11.499…	Calcineurin-like phosphoesterase, putative	16	16	16	58	36.775	326	29.6644	29.8417	29.5285	29.3376	29.2395	29.4407	29.2498	29.0305	29.1522	29.2279	29.2807	29.2358	29.2731	29.2729	29.0949	29.4733	28.8104	28.6023	28.9501	28.8986	28.4352	28.5084	28.4056	28.6356	29.6644	29.8417	29.5285	29.3376	29.2395	29.4407	29.2498	29.0305	29.1522	29.2279	29.2807	29.2358
Tb427_050027700	Tb427_050027700.1	http://tritrypdb.org/tritrypdb/processQuestion.do?questionFullName=GeneQuestions.GeneByLocusTag&questionSubmit=Get+Answer&ds_gene_ids_data=Tb427_050027700.1	Tb427_050027700	Tb427_050027700	Tb927.5.2130:mRNA-p1	Tb927.5.2130:mRNA-p1	Calcineurin-like phosphoesterase/Lariat debranching enzyme, C-terminal domain containing protein, putative	14	14	14	29.9	57.023	521	27.4313	28.0221	27.4977	27.6779	27.5282	28.1845	27.762	27.7146	27.7595	27.9221	27.7609	27.638	27.7318	27.9508	27.6388	27.7165	27.6506	27.6619	27.9002	27.9299	27.5039	28.116	27.9367	27.8294	27.4313	28.0221	27.4977	27.6779	27.5282	28.1845	27.762	27.7146	27.7595	27.9221	27.7609	27.638
Tb427_020020300	Tb427_020020300.1	http://tritrypdb.org/tritrypdb/processQuestion.do?questionFullName=GeneQuestions.GeneByLocusTag&questionSubmit=Get+Answer&ds_gene_ids_data=Tb427_020020300.1	Tb427_020020300	Tb427_020020300	Tb927.2.4390:mRNA-p1	Tb927.2.4390:mRNA-p1	Calcineurin-like phosphoesterase/Mre11 DNA-binding presumed domain containing protein, putative	13	13	13	24.7	82.2	752	27.7069	27.7899	27.85	28.0084	28.0305	27.6953	27.7976	27.3246	27.6955	27.6684	27.4392	27.4741	27.7816	27.8162	27.7514	27.7824	27.4309	27.7723	27.2705	27.5992	27.703	27.8922	27.119	27.6984	27.7069	27.7899	27.85	28.0084	28.0305	27.6953	27.7976	27.3246	27.6955	27.6684	27.4392	27.4741
Tb427_080057700	Tb427_080057700.1	http://tritrypdb.org/tritrypdb/processQuestion.do?questionFullName=GeneQuestions.GeneByLocusTag&questionSubmit=Get+Answer&ds_gene_ids_data=Tb427_080057700.1	Tb427_080057700	Tb427_080057700	Tb927.8.5240:mRNA-p1	Tb927.8.5240:mRNA-p1	Calcium-dependent channel, 7TM region, putative phosphate, putative	10	10	10	9.1	124.23	1104		25.0051		25.7081		25.5435	25.1716	25.5131	25.9299	25.9685			26.1622			26.2178	26.3957	25.9239	26.4163			25.976	27.0855		24.9	25.0051	24.7432	25.7081	24.7367	25.5435	25.1716	25.5131	25.9299	25.9685	24.3844	24.304
Tb427_010008300	Tb427_010008300.1	http://tritrypdb.org/tritrypdb/processQuestion.do?questionFullName=GeneQuestions.GeneByLocusTag&questionSubmit=Get+Answer&ds_gene_ids_data=Tb427_010008300.1	Tb427_010008300	Tb427_010008300	Tb927.1.990:mRNA-p1	Tb927.1.990:mRNA-p1	Calmodulin-binding, putative	17	17	17	52.4	42.303	374	26.9593	27.6574	27.4614	27.541	27.4727	27.3222	27.4859	28.2922	27.294	27.5195	27.8176	27.7074	27.6127	27.8484	27.7046	27.7199	28.1798	27.7679	27.8481	27.3122	27.7794	27.6805	28.1852	27.756	26.9593	27.6574	27.4614	27.541	27.4727	27.3222	27.4859	28.2922	27.294	27.5195	27.8176	27.7074
Tb427_110053900	Tb427_110053900.1	http://tritrypdb.org/tritrypdb/processQuestion.do?questionFullName=GeneQuestions.GeneByLocusTag&questionSubmit=Get+Answer&ds_gene_ids_data=Tb427_110053900.1	Tb427_110053900	Tb427_110053900	Tb927.11.4880:mRNA-p1	Tb927.11.4880:mRNA-p1	Calmodulin-binding, putative	14	14	14	61.7	30.242	274	29.5813	29.5927	29.3286	29.1783	29.6364	29.4352	29.4232	29.4158	29.6373	29.4	29.5525	29.472	29.7662	29.4077	29.4401	29.5932	29.8609	29.5947	29.796	29.5048	29.734	29.7283	29.8576	29.831	29.5813	29.5927	29.3286	29.1783	29.6364	29.4352	29.4232	29.4158	29.6373	29.4	29.5525	29.472
Tb427_090020300	Tb427_090020300.1	http://tritrypdb.org/tritrypdb/processQuestion.do?questionFullName=GeneQuestions.GeneByLocusTag&questionSubmit=Get+Answer&ds_gene_ids_data=Tb427_090020300.1	Tb427_090020300	Tb427_090020300	Tb927.9.3390:mRNA-p1	Tb927.9.3390:mRNA-p1	Calmodulin-binding, putative	6	6	6	22.5	29.273	253	25.8723	25.7539	26.8093	25.3133	26.1159	25.6684	25.3201	26.6477	26.5654	25.7747	25.9574	27.0462	25.8	25.2919	24.9794	25.4258	26.936	25.1109	26.1068	25.0962	26.4069	25.087	26.6698	26.0399	25.8723	25.7539	26.8093	25.3133	26.1159	25.6684	25.3201	26.6477	26.5654	25.7747	25.9574	27.0462
Tb427_110015700	Tb427_110015700.1	http://tritrypdb.org/tritrypdb/processQuestion.do?questionFullName=GeneQuestions.GeneByLocusTag&questionSubmit=Get+Answer&ds_gene_ids_data=Tb427_110015700.1	Tb427_110015700	Tb427_110015700	Tb927.11.1110.1-p1	Tb927.11.1110.1-p1;Tb927.11.1130:mRNA-p1;Tb11.v5.1011.1-p1;Tb927.11.1090:mRNA-p1;Tb927.11.1100:mRNA-p1;Tb11.v5.1038.1-p1;Tb11.v5.0432.1-p1;Tb11.v5.0702.1-p1;Tb11.v5.1010.1-p1;Tb927.8.4780:mRNA-p1;Tb927.9.7540:mRNA-p1;Tb927.6.3310:mRNA-p1;Tb927.4.3940:mRNA-p1	Calpain family cysteine protease, putative	32	20	20	40.9	115.38	1027	30.7753	30.622	31.0799	30.4072	31.4186	30.5028	30.8951	30.8118	30.6032	30.7572	31.1848	30.4904	31.0227	30.6448	30.7225	30.6182	31.0028	30.6298	30.7086	30.6814	30.769	30.742	30.7727	30.7068	30.7753	30.622	31.0799	30.4072	31.4186	30.5028	30.8951	30.8118	30.6032	30.7572	31.1848	30.4904
Tb427_100137500	Tb427_100137500.1	http://tritrypdb.org/tritrypdb/processQuestion.do?questionFullName=GeneQuestions.GeneByLocusTag&questionSubmit=Get+Answer&ds_gene_ids_data=Tb427_100137500.1	Tb427_100137500	Tb427_100137500	Tb927.10.13030:mRNA-p1	Tb927.10.13030:mRNA-p1;Tb927.1.2120:mRNA-p1;Tb927.4.3950:mRNA-p1;Tb927.1.2100:mRNA-p1;Tb927.8.8330:mRNA-p1;Tb927.11.1130:mRNA-p1;Tb927.11.1090:mRNA-p1;Tb927.1.2110:mRNA-p1;Tb927.9.7540:mRNA-p1	Calpain family cysteine protease, putative	14	14	14	20	83.534	746	27.6342	27.3617	27.2884	27.0349	27.5761	27.5671	27.423	27.12	27.7486	27.4023	27.0955	27.3801	27.6453	27.4939	27.3936	27.5712	27.1775	27.2205	27.2466	26.8972	27.3147	27.1854	27.3342	26.9218	27.6342	27.3617	27.2884	27.0349	27.5761	27.5671	27.423	27.12	27.7486	27.4023	27.0955	27.3801
Tb427_100022100	Tb427_100022100.1	http://tritrypdb.org/tritrypdb/processQuestion.do?questionFullName=GeneQuestions.GeneByLocusTag&questionSubmit=Get+Answer&ds_gene_ids_data=Tb427_100022100.1	Tb427_100022100	Tb427_100022100	Tb927.10.1890:mRNA-p1	Tb927.10.1890:mRNA-p1;Tb927.6.3310:mRNA-p1;Tb927.11.1130:mRNA-p1;Tb927.11.1090:mRNA-p1;Tb927.8.1540:mRNA-p1;Tb927.10.1970:mRNA-p1;Tb927.1.2100:mRNA-p1;Tb927.1.2120:mRNA-p1;Tb927.4.4400:mRNA-p1;Tb927.9.8810:mRNA-p1;Tb927.10.820:mRNA-p1;Tb927.11.4610:mRNA-p1;Tb11.v5.0587.1-p1;Tb927.1.2110:mRNA-p1;Tb927.8.7950:mRNA-p1;Tb927.1.780:mRNA-p1;Tb11.v5.0523.1-p1;Tb927.9.13440:mRNA-p1;Tb927.5.2410:mRNA-p1;T…	Calpain family cysteine protease, putative	41	41	41	33.6	178.02	1594	30.5237	30.3382	29.9772	30.0226	30.3348	30.2786	30.2516	30.0807	30.3831	30.2768	30.1215	30.0486	30.5445	30.32	30.1682	30.2471	30.4353	30.2792	30.3827	30.167	30.3504	30.3144	30.6603	30.12	30.5237	30.3382	29.9772	30.0226	30.3348	30.2786	30.2516	30.0807	30.3831	30.2768	30.1215	30.0486
Tb427_110015800	Tb427_110015800.1	http://tritrypdb.org/tritrypdb/processQuestion.do?questionFullName=GeneQuestions.GeneByLocusTag&questionSubmit=Get+Answer&ds_gene_ids_data=Tb427_110015800.1	Tb427_110015800	Tb427_110015800	Tb927.11.1130:mRNA-p1	Tb927.11.1130:mRNA-p1;Tb11.v5.1011.1-p1;Tb927.11.1090:mRNA-p1;Tb11.v5.0432.1-p1;Tb11.v5.0702.1-p1;Tb927.11.1110.1-p1;Tb11.v5.1010.1-p1;Tb11.v5.1038.1-p1;Tb927.11.1100:mRNA-p1;Tb927.8.4780:mRNA-p1;Tb927.1.2100:mRNA-p1;Tb927.4.3940:mRNA-p1;Tb927.4.3950:mRNA-p1;Tb927.8.8330:mRNA-p1;Tb927.9.7540:mRNA-p1;Tb927.1.2110:mRNA-p1;Tb927.6.3310:mRNA-p1;Tb927.10.13030:mRNA-p1;Tb927.10.1890:mRNA-p1	Calpain family cysteine protease/Calpain large subunit, domain III, putative	140	21	18	28.2	696.9	6131	26.9734	27.7306	27.5882		27.9631	28.2284	28.0619	27.1509	28.0639	27.7546	27.8596	27.7135	28.1628	28.4659	28.3776	28.1954	28.2185	29.0295	28.2015	28.136	28.3432	28.7804	28.5328	28.3516	26.9734	27.7306	27.5882	24.6025	27.9631	28.2284	28.0619	27.1509	28.0639	27.7546	27.8596	27.7135
Tb427_110015900	Tb427_110015900.1	http://tritrypdb.org/tritrypdb/processQuestion.do?questionFullName=GeneQuestions.GeneByLocusTag&questionSubmit=Get+Answer&ds_gene_ids_data=Tb427_110015900.1	Tb427_110015900	Tb427_110015900	Tb927.11.1130:mRNA-p1	Tb927.11.1130:mRNA-p1;Tb927.11.1090:mRNA-p1;Tb11.v5.0432.1-p1;Tb11.v5.0702.1-p1;Tb11.v5.1011.1-p1;Tb927.11.1110.1-p1;Tb11.v5.1010.1-p1;Tb11.v5.1038.1-p1;Tb927.11.1100:mRNA-p1;Tb927.8.4780:mRNA-p1;Tb927.1.2100:mRNA-p1;Tb927.4.3940:mRNA-p1;Tb927.4.3950:mRNA-p1;Tb927.8.8330:mRNA-p1;Tb927.9.7540:mRNA-p1;Tb927.1.2110:mRNA-p1;Tb927.6.3310:mRNA-p1;Tb927.10.13030:mRNA-p1;Tb927.10.1890:mRNA-p1	Calpain family cysteine protease/Calpain large subunit, domain III, putative	151	151	32	34	614.14	5401	30.9032	30.9591	30.7861	30.6076	31.6031	31.7168	31.7501	31.5803	31.8234	31.7254	31.7559	31.8699	31.9779	32.1809	32.0143	32.0433	31.4659	32.3448	32.0975	32.3344	32.0085	32.3096	32.0637	32.4897	30.9032	30.9591	30.7861	30.6076	31.6031	31.7168	31.7501	31.5803	31.8234	31.7254	31.7559	31.8699
Tb427_060038200	Tb427_060038200.1	http://tritrypdb.org/tritrypdb/processQuestion.do?questionFullName=GeneQuestions.GeneByLocusTag&questionSubmit=Get+Answer&ds_gene_ids_data=Tb427_060038200.1	Tb427_060038200	Tb427_060038200	Tb927.6.3310:mRNA-p1	Tb927.6.3310:mRNA-p1;Tb927.10.1890:mRNA-p1;Tb927.9.8810:mRNA-p1;Tb927.1.2100:mRNA-p1;Tb927.1.2120:mRNA-p1;Tb927.10.1970:mRNA-p1;Tb927.10.820:mRNA-p1;Tb927.4.3940:mRNA-p1;Tb927.11.4610:mRNA-p1;Tb11.v5.0587.1-p1;Tb927.4.4400:mRNA-p1;Tb927.8.7950:mRNA-p1;Tb927.9.7540:mRNA-p1;Tb927.11.9370:mRNA-p1;Tb927.9.13440:mRNA-p1;Tb927.1.780:mRNA-p1;Tb11.v5.0523.1-p1;Tb927.11.4640:mRNA-p1;Tb927.8.2130:mRNA-p1;T…	Calpain family cysteine protease/Calpain large subunit, domain III, putative	19	19	19	24.3	113.35	1010	28.419	28.3727	27.9226	28.2221	28.3136	28.3461	28.0432	28.3674	28.4678	28.0385	27.8067	27.9308	28.2597	27.9848	27.8991	28.0868	28.035	27.79	27.9132	27.785	27.8448	27.6382	28.1712	27.7498	28.419	28.3727	27.9226	28.2221	28.3136	28.3461	28.0432	28.3674	28.4678	28.0385	27.8067	27.9308
Tb427_110125300	Tb427_110125300.1	http://tritrypdb.org/tritrypdb/processQuestion.do?questionFullName=GeneQuestions.GeneByLocusTag&questionSubmit=Get+Answer&ds_gene_ids_data=Tb427_110125300.1	Tb427_110125300	Tb427_110125300	Tb927.11.11000:mRNA-p1	Tb927.11.11000:mRNA-p1	Calponin homology (CH) domain containing protein, putative	15	15	15	35.5	54.882	493	29.4972	29.4104	29.2394	29.4609	29.4637	29.5031	29.2476	29.4785	29.5751	29.5691	29.4639	29.6313	29.626	29.6224	29.4458	29.7729	29.5523	29.1451	29.3534	29.736	29.2925	29.0688	29.4481	29.5545	29.4972	29.4104	29.2394	29.4609	29.4637	29.5031	29.2476	29.4785	29.5751	29.5691	29.4639	29.6313
Tb427_080079900	Tb427_080079900.1	http://tritrypdb.org/tritrypdb/processQuestion.do?questionFullName=GeneQuestions.GeneByLocusTag&questionSubmit=Get+Answer&ds_gene_ids_data=Tb427_080079900.1	Tb427_080079900	Tb427_080079900	Tb927.8.7410:mRNA-p1	Tb927.8.7410:mRNA-p1;Tb927.4.5010:mRNA-p1	Calreticulin family, putative	37	37	7	74.6	44.921	394	33.6209	33.5659	33.4927	33.4791	33.6971	33.5789	33.6303	33.6189	33.7376	33.5432	33.77	33.762	33.7441	33.5175	33.5465	33.6736	33.6656	33.65	33.45	33.5518	33.5119	33.4622	33.5519	33.3857	33.6209	33.5659	33.4927	33.4791	33.6971	33.5789	33.6303	33.6189	33.7376	33.5432	33.77	33.762
Tb427_040053500	Tb427_040053500.1	http://tritrypdb.org/tritrypdb/processQuestion.do?questionFullName=GeneQuestions.GeneByLocusTag&questionSubmit=Get+Answer&ds_gene_ids_data=Tb427_040053500.1	Tb427_040053500	Tb427_040053500	Tb927.4.5010:mRNA-p1	Tb927.4.5010:mRNA-p1;Tb927.8.7410:mRNA-p1	Calreticulin family, putative	35	5	5	74.6	44.954	394	29.3616	28.7843	29.3183	28.4795	28.9385	28.6782	29.01	28.7122	29.3649	29.4008	29.4295	29.5181	29.2431	28.823	29.0326	29.4447	29.2586	29.1515	28.8241	28.778	29.19	28.8394	29.222	28.7567	29.3616	28.7843	29.3183	28.4795	28.9385	28.6782	29.01	28.7122	29.3649	29.4008	29.4295	29.5181
Tb427_040008500	Tb427_040008500.1	http://tritrypdb.org/tritrypdb/processQuestion.do?questionFullName=GeneQuestions.GeneByLocusTag&questionSubmit=Get+Answer&ds_gene_ids_data=Tb427_040008500.1	Tb427_040008500	Tb427_040008500	Tb927.4.660:mRNA-p1	Tb927.4.660:mRNA-p1	Cancer susceptibility candidate 1 N-terminus, putative	21	21	21	32.2	78.751	687	30.2602	30.1583	29.8325	29.7403	30.1971	30.1442	30.0666	29.7073	30.0732	30.0609	29.8381	29.7683	30.1784	30.1349	30.0751	30.1042	29.8251	30.1177	30.016	30.0272	29.9293	30.1037	30.1541	30.0366	30.2602	30.1583	29.8325	29.7403	30.1971	30.1442	30.0666	29.7073	30.0732	30.0609	29.8381	29.7683
Tb427_050044600	Tb427_050044600.1	http://tritrypdb.org/tritrypdb/processQuestion.do?questionFullName=GeneQuestions.GeneByLocusTag&questionSubmit=Get+Answer&ds_gene_ids_data=Tb427_050044600.1	Tb427_050044600	Tb427_050044600	Tb927.5.3800:mRNA-p1	Tb927.5.3800:mRNA-p1;Tb927.4.5350:pseudogenic_transcript-p1	Carbamoyl-phosphate synthase small chain, CPSase domain/Glutamine amidotransferase class-I/Carbamoyl-phosphate synthase L chain, ATP binding domain/ATP-grasp domain/D-ala D-ala ligase C-terminus/Carbamoyl-phosphate synthetase large chain, oligomerisation domain/Arginosuccinate synthase, putative	99	99	99	67.3	204	1833	34.5649	34.7669	34.5976	34.5022	34.4559	34.6962	34.5255	34.2684	34.3669	34.737	34.5471	34.4244	34.5124	34.7426	34.5164	34.5901	34.2688	34.6504	34.1157	34.6016	34.4692	34.7211	34.2009	34.2591	34.5649	34.7669	34.5976	34.5022	34.4559	34.6962	34.5255	34.2684	34.3669	34.737	34.5471	34.4244
Tb427_090009500	Tb427_090009500.1	http://tritrypdb.org/tritrypdb/processQuestion.do?questionFullName=GeneQuestions.GeneByLocusTag&questionSubmit=Get+Answer&ds_gene_ids_data=Tb427_090009500.1	Tb427_090009500	Tb427_090009500	Tb927.9.1960:mRNA-p1	Tb927.9.1960:mRNA-p1	Carbon-nitrogen hydrolase, putative	16	16	16	71.4	30.249	273	31.8668	31.8125	31.5972	31.5944	32.3749	32.2777	32.1952	32.1698	32.5371	32.3659	32.2921	32.3601	32.4542	32.4217	32.2594	32.4018	31.9174	32.014	32.1242	32.3066	31.9906	32.1908	32.2087	32.1905	31.8668	31.8125	31.5972	31.5944	32.3749	32.2777	32.1952	32.1698	32.5371	32.3659	32.2921	32.3601
Tb427_110071300	Tb427_110071300.1	http://tritrypdb.org/tritrypdb/processQuestion.do?questionFullName=GeneQuestions.GeneByLocusTag&questionSubmit=Get+Answer&ds_gene_ids_data=Tb427_110071300.1	Tb427_110071300	Tb427_110071300	Tb927.11.6630:mRNA-p1	Tb927.11.6630:mRNA-p1	Carboxyl transferase domain containing protein, putative	21	21	21	45.6	66.517	612	29.3539	29.4779	29.4652	28.9804	29.3607	29.375	29.5447	29.3996	29.3861	29.4345	29.6369	29.1599	29.5125	29.7945	29.5213	29.6521	29.4751	29.3834	29.4188	29.8719	29.4739	29.5345	29.7698	30.2144	29.3539	29.4779	29.4652	28.9804	29.3607	29.375	29.5447	29.3996	29.3861	29.4345	29.6369	29.1599
Tb427_050023400	Tb427_050023400.1	http://tritrypdb.org/tritrypdb/processQuestion.do?questionFullName=GeneQuestions.GeneByLocusTag&questionSubmit=Get+Answer&ds_gene_ids_data=Tb427_050023400.1	Tb427_050023400	Tb427_050023400	Tb927.5.1760:mRNA-p1	Tb927.5.1760:mRNA-p1	Carboxylesterase family/Alpha/beta hydrolase family/alpha/beta hydrolase fold, putative	8	8	8	14.2	72.65	661	27.2808	26.8899	26.7356	26.8627	26.6587	26.1314	26.674	26.6853	25.4518	26.4639	26.1651	26.6589	26.3019	26.2285	26.2227	26.5423	25.4632	25.0917	25.8705		24.8699				27.2808	26.8899	26.7356	26.8627	26.6587	26.1314	26.674	26.6853	25.4518	26.4639	26.1651	26.6589
Tb427_110029900	Tb427_110029900.1	http://tritrypdb.org/tritrypdb/processQuestion.do?questionFullName=GeneQuestions.GeneByLocusTag&questionSubmit=Get+Answer&ds_gene_ids_data=Tb427_110029900.1	Tb427_110029900	Tb427_110029900	Tb927.11.2500:mRNA-p1	Tb927.11.2500:mRNA-p1	Carboxypeptidase Taq (M32) metallopeptidase, putative	32	32	32	65.4	57.683	503	32.5538	32.5761	32.8693	32.6058	33.3323	32.9434	33.2732	33.0284	33.1311	33.1061	32.9903	32.7789	33.0809	33.1922	33.0984	32.9485	32.6458	32.7803	32.136	32.9459	32.5117	32.5457	32.252	32.5446	32.5538	32.5761	32.8693	32.6058	33.3323	32.9434	33.2732	33.0284	33.1311	33.1061	32.9903	32.7789
Tb427_110123400	Tb427_110123400.1	http://tritrypdb.org/tritrypdb/processQuestion.do?questionFullName=GeneQuestions.GeneByLocusTag&questionSubmit=Get+Answer&ds_gene_ids_data=Tb427_110123400.1	Tb427_110123400	Tb427_110123400	Tb927.11.10820:mRNA-p1	Tb927.11.10820:mRNA-p1	Casein kinase II regulatory subunit, putative	6	6	6	27.2	33.52	294	29.2571	29.1083	28.9569	29.3449	29.1395	29.0285	28.9129	29.236	29.2751	29.0232	29.5408	29.5932	29.4688	29.0932	29.5336	29.658	29.5512	28.9489	29.6384	29.3876	29.3314	29.2435	29.5085	29.5874	29.2571	29.1083	28.9569	29.3449	29.1395	29.0285	28.9129	29.236	29.2751	29.0232	29.5408	29.5932
Tb427_090084600	Tb427_090084600.1	http://tritrypdb.org/tritrypdb/processQuestion.do?questionFullName=GeneQuestions.GeneByLocusTag&questionSubmit=Get+Answer&ds_gene_ids_data=Tb427_090084600.1	Tb427_090084600	Tb427_090084600	Tb927.9.14220:mRNA-p1	Tb927.9.14220:mRNA-p1;Tb927.6.940:mRNA-p1;Tb927.6.930:mRNA-p1;Tb927.10.2440:mRNA-p1;Tb927.11.3220:mRNA-p1	Caspase domain containing protein, putative	19	19	19	45.9	54.466	492	30.3207	30.2768	30.0802	29.8582	31.0686	30.8515	30.9356	30.4497	30.7551	30.8394	30.7712	30.7731	31.02	30.7124	30.6507	30.5715	30.6162	29.8436	30.0541	30.7494	30.0774	29.8378	29.8991	30.0841	30.3207	30.2768	30.0802	29.8582	31.0686	30.8515	30.9356	30.4497	30.7551	30.8394	30.7712	30.7731
Tb427_100028700	Tb427_100028700.1	http://tritrypdb.org/tritrypdb/processQuestion.do?questionFullName=GeneQuestions.GeneByLocusTag&questionSubmit=Get+Answer&ds_gene_ids_data=Tb427_100028700.1	Tb427_100028700	Tb427_100028700	Tb927.10.2440:mRNA-p1	Tb927.10.2440:mRNA-p1;Tb927.6.930:mRNA-p1;Tb927.6.940:mRNA-p1;Tb927.11.3220:mRNA-p1;Tb927.9.14220:mRNA-p1	Caspase domain containing protein, putative	5	5	5	21	38.956	353	26.6071	26.6091	26.0288	26.2429	27.717	27.1079	27.0039	26.3574	27.6726	27.0001	26.8442	26.7648	27.4777	27.2751	26.8182	27.0622	27.578	27.0536	26.8003	27.2042	27.061	27.0273	26.5376	27.5848	26.6071	26.6091	26.0288	26.2429	27.717	27.1079	27.0039	26.3574	27.6726	27.0001	26.8442	26.7648
Tb427_060012800:pseudogene	Tb427_060012800.1;Tb427_060012700.1	http://tritrypdb.org/tritrypdb/processQuestion.do?questionFullName=GeneQuestions.GeneByLocusTag&questionSubmit=Get+Answer&ds_gene_ids_data=Tb427_060012800.1,Tb427_060012700.1	Tb427_060012800:pseudogene;Tb427_060012700:pseudogene	Tb427_060012800:pseudogene	Tb927.6.940:mRNA-p1;Tb927.6.930:mRNA-p1	Tb927.6.940:mRNA-p1;Tb927.6.930:mRNA-p1;Tb927.10.2440:mRNA-p1;Tb927.9.14220:mRNA-p1;Tb927.11.3220:mRNA-p1	Caspase domain containing protein, putative	4	4	4	16.9	34.892	320	26.8923	25.9797	26.0377	26.2687			25.7575	25.6668								26.4171							26.0063		26.8923	25.9797	26.0377	26.2687	24.7806	24.3495	25.7575	25.6668	24.822	24.8865	24.2409	24.1499
Tb427_100061600	Tb427_100061600.1	http://tritrypdb.org/tritrypdb/processQuestion.do?questionFullName=GeneQuestions.GeneByLocusTag&questionSubmit=Get+Answer&ds_gene_ids_data=Tb427_100061600.1	Tb427_100061600	Tb427_100061600	Tb927.10.5750:mRNA-p1	Tb927.10.5750:mRNA-p1	Catalytic LigB subunit of aromatic ring-opening dioxygenase, putative	5	5	5	29.7	29.729	269	26.0417	26.3504	26.2449		26.5469	27.0901	26.7358		26.6053	26.5392	26.1645	26.5692	26.047	26.4409	26.0034	26.1924	25.9589	26.0579			25.7939	25.7986	25.3587	25.3846	26.0417	26.3504	26.2449	24.7558	26.5469	27.0901	26.7358	24.1284	26.6053	26.5392	26.1645	26.5692
Tb427_060014100	Tb427_060014100.1;Tb427_060014000.1;Tb427_060013900.1;Tb427_060013800.1;Tb427_060013500.1;Tb427_060013400.1;Tb427_060013100.1;Tb427_060013700.1;Tb427_060013600.1;Tb427_060014200.1	http://tritrypdb.org/tritrypdb/processQuestion.do?questionFullName=GeneQuestions.GeneByLocusTag&questionSubmit=Get+Answer&ds_gene_ids_data=Tb427_060014100.1,Tb427_060014000.1,Tb427_060013900.1,Tb427_060013800.1,Tb427_060013500.1,Tb427_060013400.1,Tb427_060013100.1,Tb427_060013700.1,Tb427_060013600.1,Tb427_060014200.1	Tb427_060014100;Tb427_060014000;Tb427_060013900;Tb427_060013800;Tb427_060013500;Tb427_060013400;Tb427_060013100:pseudogene;Tb427_060013700;Tb427_060013600;Tb427_060014200	Tb427_060014100	Tb927.6.1020:mRNA-p1	Tb927.6.1020:mRNA-p1;Tb927.6.1000:mRNA-p1;Tb927.6.1050:mRNA-p1;Tb927.6.1060:mRNA-p1;Tb927.6.990:mRNA-p1;Tb927.6.1010:mRNA-p1;Tb927.6.960:mRNA-p1;Tb927.6.970:mRNA-p1;Tb927.6.980:mRNA-p1;Tb927.6.1030:mRNA-p1;Tb927.6.1040:mRNA-p1;Tb927.6.560:mRNA-p1	Cathepsin propeptide inhibitor domain (I29)/Papain family cysteine protease/Protein of unknown function (DUF3586), putative	9	9	1	24.1	48.345	449	32.4368	32.3149	32.5233	31.923	32.3882	32.023	32.5707	32.0798	32.728	32.3161	32.4566	32.4861	32.4676	32.5526	32.559	32.8067	32.6886	32.8422	32.7637	32.7877	32.7443	32.7842	32.6966	32.995	32.4368	32.3149	32.5233	31.923	32.3882	32.023	32.5707	32.0798	32.728	32.3161	32.4566	32.4861
Tb427_100169000	Tb427_100169000.1	http://tritrypdb.org/tritrypdb/processQuestion.do?questionFullName=GeneQuestions.GeneByLocusTag&questionSubmit=Get+Answer&ds_gene_ids_data=Tb427_100169000.1	Tb427_100169000	Tb427_100169000	Tb927.10.15940:mRNA-p1	Tb927.10.15940:mRNA-p1;Tb11.v5.0304.1-p1;Tb927.11.1910:mRNA-p1	Cation efflux family, putative	10	10	10	22.3	51.399	471	28.1902	28.43	28.6132	28.199	28.3455	28.6206	28.7113	28.4381	28.3468	28.4564	28.3987	28.5228	28.9018	28.8515	28.7259	28.7604	28.4891	28.8448	28.7211	28.6548	28.8237	28.8994	28.6734	28.6984	28.1902	28.43	28.6132	28.199	28.3455	28.6206	28.7113	28.4381	28.3468	28.4564	28.3987	28.5228
Tb427_080080400	Tb427_080080400.1;Tb427_040053000.1	http://tritrypdb.org/tritrypdb/processQuestion.do?questionFullName=GeneQuestions.GeneByLocusTag&questionSubmit=Get+Answer&ds_gene_ids_data=Tb427_080080400.1,Tb427_040053000.1	Tb427_080080400;Tb427_040053000	Tb427_080080400	Tb927.8.7460:mRNA-p1;Tb927.4.4960:mRNA-p1	Tb927.8.7460:mRNA-p1;Tb927.4.4960:mRNA-p1;Tb11.v5.0836.1-p1;Tb927.11.1910:mRNA-p1	Cation efflux family, putative	4	4	4	8.3	50.823	471		25.6148			25.7158			25.7453	26.6733		26.0719	25.6717					26.4075	25.5144					25.9796	26.4059	25.0568	25.6148	24.8551	24.597	25.7158	24.4546	24.56	25.7453	26.6733	24.6484	26.0719	25.6717
Tb427_110023900	Tb427_110023900.1	http://tritrypdb.org/tritrypdb/processQuestion.do?questionFullName=GeneQuestions.GeneByLocusTag&questionSubmit=Get+Answer&ds_gene_ids_data=Tb427_110023900.1	Tb427_110023900	Tb427_110023900	Tb927.11.1910:mRNA-p1	Tb927.11.1910:mRNA-p1;Tb927.4.4960:mRNA-p1;Tb927.8.7460:mRNA-p1;Tb11.v5.0836.1-p1;Tb927.10.15940:mRNA-p1	Cation efflux family, putative	5	5	5	20.2	34.765	322	27.7703	27.6574	26.5159	26.6188	27.9191	27.7539	27.315		27.1227	27.3621	27.412	27.6051	27.6848	27.6014	27.7528	28.4162	27.5958	27.7241	27.5113	27.5928	27.5458	27.536	27.4245	27.8514	27.7703	27.6574	26.5159	26.6188	27.9191	27.7539	27.315	24.5902	27.1227	27.3621	27.412	27.6051
Tb427_100132400	Tb427_100132400.1	http://tritrypdb.org/tritrypdb/processQuestion.do?questionFullName=GeneQuestions.GeneByLocusTag&questionSubmit=Get+Answer&ds_gene_ids_data=Tb427_100132400.1	Tb427_100132400	Tb427_100132400	Tb927.10.12500:mRNA-p1	Tb927.10.12500:mRNA-p1;Tb927.10.12510:mRNA-p1;Tb927.5.3400:mRNA-p1;Tb927.9.15460:mRNA-p1;Tb927.8.1180:mRNA-p1;Tb927.8.1200:mRNA-p1;Tb927.8.1160:mRNA-p1;Tb927.10.11620:mRNA-p1;Tb927.6.3550.1:mRNA-p1;Tb927.6.3550.2:mRNA-p1;Tb927.8.650:mRNA-p1;Tb927.11.1260:mRNA-p1;Tb11.v5.0712.1-p1	Cation transporter/ATPase, N-terminus/E1-E2 ATPase/haloacid dehalogenase-like hydrolase, putative	46	46	7	56.1	100.24	912	33.7582	33.5045	33.6727	33.5188	34.2256	33.9118	34.1278	33.9935	34.3054	34.1685	34.2361	34.2633	34.3361	34.2464	34.2809	34.2713	34.3052	34.2153	34.211	34.293	34.2905	34.2164	34.4222	34.4924	33.7582	33.5045	33.6727	33.5188	34.2256	33.9118	34.1278	33.9935	34.3054	34.1685	34.2361	34.2633
Tb427_080011800	Tb427_080011800.1	http://tritrypdb.org/tritrypdb/processQuestion.do?questionFullName=GeneQuestions.GeneByLocusTag&questionSubmit=Get+Answer&ds_gene_ids_data=Tb427_080011800.1	Tb427_080011800	Tb427_080011800	Tb927.8.1160:mRNA-p1	Tb927.8.1160:mRNA-p1;Tb927.8.1180:mRNA-p1;Tb927.8.1200:mRNA-p1;Tb927.10.11620:mRNA-p1;Tb927.5.3400:mRNA-p1;Tb11.v5.0712.1-p1;Tb927.9.15460:mRNA-p1;Tb927.10.12500:mRNA-p1;Tb927.10.12510:mRNA-p1;Tb927.8.650:mRNA-p1;Tb927.11.1260:mRNA-p1;Tb927.6.3550.1:mRNA-p1;Tb927.6.3550.2:mRNA-p1;Tb927.11.3350:mRNA-p1;Tb927.11.13000:mRNA-p1	Cation transporter/ATPase, N-terminus/E1-E2 ATPase/haloacid dehalogenase-like hydrolase/Cation transport ATPase (P-type)/Cation transporting ATPase, C-terminus, putative	31	31	10	35.3	121.29	1102	29.8481	29.8256	29.5382	29.3701	30.2402	29.7763	29.8393	29.668	30.1306	30.1031	29.9756	29.8703	30.5039	30.2743	30.3283	30.0048	30.4546	30.7487	30.1914	30.2494	30.537	30.6444	30.3252	30.6556	29.8481	29.8256	29.5382	29.3701	30.2402	29.7763	29.8393	29.668	30.1306	30.1031	29.9756	29.8703
Tb427_090090000	Tb427_090090000.1	http://tritrypdb.org/tritrypdb/processQuestion.do?questionFullName=GeneQuestions.GeneByLocusTag&questionSubmit=Get+Answer&ds_gene_ids_data=Tb427_090090000.1	Tb427_090090000	Tb427_090090000	Tb927.9.15460:mRNA-p1	Tb927.9.15460:mRNA-p1;Tb927.5.3400:mRNA-p1;Tb927.8.1200:mRNA-p1;Tb927.8.1160:mRNA-p1;Tb927.8.1180:mRNA-p1;Tb927.10.12500:mRNA-p1;Tb927.10.12510:mRNA-p1;Tb927.10.11620:mRNA-p1;Tb11.v5.0712.1-p1;Tb927.4.1510:mRNA-p1;Tb927.11.1260:mRNA-p1;Tb927.8.650:mRNA-p1;Tb927.6.3550.1:mRNA-p1;Tb927.6.3550.2:mRNA-p1	Cation transporter/ATPase, N-terminus/E1-E2 ATPase/haloacid dehalogenase-like hydrolase/Cation transport ATPase (P-type)/Cation transporting ATPase, C-terminus, putative	41	41	41	43	113.97	1041	31.6449	31.8784	31.5004	31.6855	31.8691	31.7537	31.7755	31.9145	31.493	31.6108	31.7885	31.6496	31.8859	31.7635	31.875	31.8741	31.9101	31.858	31.8192	31.9129	32.0569	32.1581	32.0082	32.2711	31.6449	31.8784	31.5004	31.6855	31.8691	31.7537	31.7755	31.9145	31.493	31.6108	31.7885	31.6496
Tb427_050040500	Tb427_050040500.1	http://tritrypdb.org/tritrypdb/processQuestion.do?questionFullName=GeneQuestions.GeneByLocusTag&questionSubmit=Get+Answer&ds_gene_ids_data=Tb427_050040500.1	Tb427_050040500	Tb427_050040500	Tb927.5.3400:mRNA-p1	Tb927.5.3400:mRNA-p1;Tb927.9.15460:mRNA-p1;Tb927.8.1200:mRNA-p1;Tb927.8.1160:mRNA-p1;Tb927.8.1180:mRNA-p1;Tb927.10.12500:mRNA-p1;Tb927.10.12510:mRNA-p1;Tb927.10.11620:mRNA-p1;Tb11.v5.0712.1-p1;Tb927.11.1260:mRNA-p1;Tb927.8.650:mRNA-p1;Tb927.6.3550.1:mRNA-p1;Tb927.6.3550.2:mRNA-p1;Tb927.4.1510:mRNA-p1;Tb927.11.13000:mRNA-p1;Tb927.11.3350:mRNA-p1	Cation transporter/ATPase, N-terminus/E1-E2 ATPase/haloacid dehalogenase-like hydrolase/Cation transport ATPase (P-type)/Cation transporting ATPase, C-terminus, putative	53	53	53	54.1	110.3	1011	32.8176	32.8361	32.8407	32.5338	32.8423	32.9568	32.8778	32.7769	32.8953	32.8336	32.7729	32.7434	32.9497	32.8261	32.7584	32.7231	32.946	33.1082	32.825	32.6907	33.0851	33.2679	33.0092	32.916	32.8176	32.8361	32.8407	32.5338	32.8423	32.9568	32.8778	32.7769	32.8953	32.8336	32.7729	32.7434
Tb427_070055000	Tb427_070055000.1	http://tritrypdb.org/tritrypdb/processQuestion.do?questionFullName=GeneQuestions.GeneByLocusTag&questionSubmit=Get+Answer&ds_gene_ids_data=Tb427_070055000.1	Tb427_070055000	Tb427_070055000	Tb11.v5.0174.1-p1	Tb11.v5.0174.1-p1;Tb927.7.4930:mRNA-p1	Caulimovirus viroplasmin/RNase H, putative	6	6	6	22.9	33.1	301	25.8613	26.0205	26.1317	26.1256	25.4283	25.8689	26.1622	25.9819	25.8591	26.0865	25.4487	25.7221	26.0497	26.0101	25.734	25.7782	25.6602	25.8171	26.0159	25.6651	25.6549	25.6088	25.322	25.5653	25.8613	26.0205	26.1317	26.1256	25.4283	25.8689	26.1622	25.9819	25.8591	26.0865	25.4487	25.7221
Tb427_110026100	Tb427_110026100.1	http://tritrypdb.org/tritrypdb/processQuestion.do?questionFullName=GeneQuestions.GeneByLocusTag&questionSubmit=Get+Answer&ds_gene_ids_data=Tb427_110026100.1	Tb427_110026100	Tb427_110026100	Tb927.11.2120:mRNA-p1	Tb927.11.2120:mRNA-p1	CBF/Mak21 family, putative	25	25	25	33.9	88.837	788	30.609	30.5536	30.5257	30.4145	30.1905	30.5083	30.1176	30.1507	30.2416	30.239	29.6402	29.8484	29.7787	29.7451	29.7295	29.5156	29.289	29.3108	28.7455	29.0489	28.5877	28.9054	28.6971	28.2289	30.609	30.5536	30.5257	30.4145	30.1905	30.5083	30.1176	30.1507	30.2416	30.239	29.6402	29.8484
Tb427_040039500	Tb427_040039500.1	http://tritrypdb.org/tritrypdb/processQuestion.do?questionFullName=GeneQuestions.GeneByLocusTag&questionSubmit=Get+Answer&ds_gene_ids_data=Tb427_040039500.1	Tb427_040039500	Tb427_040039500	Tb927.4.3670:mRNA-p1	Tb927.4.3670:mRNA-p1	CBF/Mak21 family, putative	10	10	10	26.9	51.727	457	28.704	28.3032	28.2666	28.6773	28.1205	28.2608	28.1717	27.9252	27.7497	27.9484	26.9343	26.2737	27.7932	27.6628	27.0057	27.049	26.123	26.734	26.8368	27.2119	26.1234	26.3438	25.9822	26.7129	28.704	28.3032	28.2666	28.6773	28.1205	28.2608	28.1717	27.9252	27.7497	27.9484	26.9343	26.2737
Tb427_100041600	Tb427_100041600.1	http://tritrypdb.org/tritrypdb/processQuestion.do?questionFullName=GeneQuestions.GeneByLocusTag&questionSubmit=Get+Answer&ds_gene_ids_data=Tb427_100041600.1	Tb427_100041600	Tb427_100041600	Tb927.10.3700:mRNA-p1	Tb927.10.3700:mRNA-p1	CBS domain containing protein, putative	26	26	26	62.9	55.264	502	29.8559	29.9986	29.6384	29.7245	30.497	30.5382	30.514	30.4292	30.5022	30.6519	30.5593	30.5812	30.5462	30.6981	30.6463	30.6557	30.4792	30.3905	30.3717	30.7604	30.3828	30.3172	30.3434	30.5882	29.8559	29.9986	29.6384	29.7245	30.497	30.5382	30.514	30.4292	30.5022	30.6519	30.5593	30.5812
Tb427_110123200	Tb427_110123200.1	http://tritrypdb.org/tritrypdb/processQuestion.do?questionFullName=GeneQuestions.GeneByLocusTag&questionSubmit=Get+Answer&ds_gene_ids_data=Tb427_110123200.1	Tb427_110123200	Tb427_110123200	Tb927.11.10800:mRNA-p1	Tb927.11.10800:mRNA-p1	CCDC81 eukaryotic HU domain 1/CCDC81 eukaryotic HU domain 2, putative	15	15	15	76.7	29.861	262	29.5676	29.4227	28.9769	29.1218	29.3725	29.3098	29.1601	29.3474	29.7124	29.2662	29.4463	29.3911	29.4228	29.3069	29.3624	29.2861	29.4486	29.6249	29.6761	29.2187	29.7646	29.405	29.6854	29.6745	29.5676	29.4227	28.9769	29.1218	29.3725	29.3098	29.1601	29.3474	29.7124	29.2662	29.4463	29.3911
Tb427_100083900	Tb427_100083900.1	http://tritrypdb.org/tritrypdb/processQuestion.do?questionFullName=GeneQuestions.GeneByLocusTag&questionSubmit=Get+Answer&ds_gene_ids_data=Tb427_100083900.1	Tb427_100083900	Tb427_100083900	Tb927.10.7730:mRNA-p1	Tb927.10.7730:mRNA-p1	CCDC81 eukaryotic HU domain 2, putative	16	16	16	43.6	43.486	383	28.5332	28.5509	28.101	28.1782	28.5374	28.3002	28.0029	28.024	28.2177	28.2502	28.1745	27.9304	28.2778	28.3181	28.0427	28.2918	28.4338	28.6692	28.2571	27.9135	28.1626	28.2632	28.663	27.9415	28.5332	28.5509	28.101	28.1782	28.5374	28.3002	28.0029	28.024	28.2177	28.2502	28.1745	27.9304
Tb427_090053800	Tb427_090053800.1	http://tritrypdb.org/tritrypdb/processQuestion.do?questionFullName=GeneQuestions.GeneByLocusTag&questionSubmit=Get+Answer&ds_gene_ids_data=Tb427_090053800.1	Tb427_090053800	Tb427_090053800	Tb927.9.9520:mRNA-p1	Tb927.9.9520:mRNA-p1;Tb927.11.8470:mRNA-p1;Tb927.11.1980:mRNA-p1	CCCH-type zinc finger containing protein, putative	9	9	9	27	37.741	345	28.121	26.9238	28.1685	26.8877	27.3954	27.0889	26.9616	26.4958	27.355	26.7752	26.8522	26.1901	26.8124	26.579	26.5369	25.9339	26.2016			24.9362					28.121	26.9238	28.1685	26.8877	27.3954	27.0889	26.9616	26.4958	27.355	26.7752	26.8522	26.1901
Tb427_070055500	Tb427_070055500.1	http://tritrypdb.org/tritrypdb/processQuestion.do?questionFullName=GeneQuestions.GeneByLocusTag&questionSubmit=Get+Answer&ds_gene_ids_data=Tb427_070055500.1	Tb427_070055500	Tb427_070055500	Tb927.7.4980:mRNA-p1	Tb927.7.4980:mRNA-p1;Tb11.v5.0179.1-p1;Tb927.3.790:mRNA-p1;Tb927.10.820:mRNA-p1	CCCH-type zinc finger/Zinc finger C-x8-C-x5-C-x3-H type (and similar), putative	6	6	6	22	43.431	395	26.4696	25.8237	25.746	26.2128	25.5732	25.7251	25.8901	25.1181	25.7345	25.557	25.5414	25.8657	25.8967	25.776	26.0499	25.2449	25.8873	26.0085	25.6924	25.5685	25.5724	25.3943	25.7303	25.4143	26.4696	25.8237	25.746	26.2128	25.5732	25.7251	25.8901	25.1181	25.7345	25.557	25.5414	25.8657
Tb427_110144200	Tb427_110144200.1	http://tritrypdb.org/tritrypdb/processQuestion.do?questionFullName=GeneQuestions.GeneByLocusTag&questionSubmit=Get+Answer&ds_gene_ids_data=Tb427_110144200.1	Tb427_110144200	Tb427_110144200	Tb927.11.12750:mRNA-p1	Tb927.11.12750:mRNA-p1;Tb11.v5.0291.1-p1;Tb927.10.6070:mRNA-p1	CCCH-type zinc finger/Zinc knuckle, putative	7	7	7	28.2	31.577	277	26.7596	26.9469	27.0767	26.7738	26.8224	26.9201	26.7783	26.5813	26.2891	26.4254	26.712	26.699	26.4378	27.0136	26.8054	26.8656	25.5896	26.3845	26.1996	26.2389	26.6273	26.4845	25.9034	26.4463	26.7596	26.9469	27.0767	26.7738	26.8224	26.9201	26.7783	26.5813	26.2891	26.4254	26.712	26.699
Tb427_100018100	Tb427_100018100.1	http://tritrypdb.org/tritrypdb/processQuestion.do?questionFullName=GeneQuestions.GeneByLocusTag&questionSubmit=Get+Answer&ds_gene_ids_data=Tb427_100018100.1	Tb427_100018100	Tb427_100018100	Tb927.10.1510:mRNA-p1	Tb927.10.1510:mRNA-p1	CCR4-NOT transcription complex subunit 1 TTP binding domain/CCR4-NOT transcription complex subunit 1 CAF1-binding domain/Domain of unknown function (DUF3819)/CCR4-Not complex component, Not1, putative	132	132	132	68.9	259.01	2323	33.8883	33.8073	33.8067	33.6107	34.088	33.9538	33.979	33.7507	33.8989	33.9198	33.8433	33.7156	33.9599	33.913	33.9585	33.9033	33.8203	33.7577	33.74	33.7046	33.5985	33.7169	33.6411	33.3559	33.8883	33.8073	33.8067	33.6107	34.088	33.9538	33.979	33.7507	33.8989	33.9198	33.8433	33.7156
Tb427_060055000	Tb427_060055000.1	http://tritrypdb.org/tritrypdb/processQuestion.do?questionFullName=GeneQuestions.GeneByLocusTag&questionSubmit=Get+Answer&ds_gene_ids_data=Tb427_060055000.1	Tb427_060055000	Tb427_060055000	Tb927.6.5000:mRNA-p1	Tb927.6.5000:mRNA-p1	CDK5 regulatory subunit-associated protein 3, putative	18	18	18	47	44.108	394	29.0221	28.9471	28.8407	29.2089	28.8123	28.6148	28.718	28.8826	29.0053	28.9057	28.8506	28.9494	29.0656	28.9761	28.9078	29.0181	29.0549	28.901	28.7906	28.7784	28.4666	28.6238	28.5543	28.5353	29.0221	28.9471	28.8407	29.2089	28.8123	28.6148	28.718	28.8826	29.0053	28.9057	28.8506	28.9494
Tb427_090007400	Tb427_090007400.1	http://tritrypdb.org/tritrypdb/processQuestion.do?questionFullName=GeneQuestions.GeneByLocusTag&questionSubmit=Get+Answer&ds_gene_ids_data=Tb427_090007400.1	Tb427_090007400	Tb427_090007400	Tb927.9.1610:mRNA-p1	Tb927.9.1610:mRNA-p1	CDP-alcohol phosphatidyltransferase, putative	4	4	4	32.7	24.11	217	26.84	26.2786	26.7285		26.926	25.9003	26.3459	26.7229	26.9176	26.4506	26.5822	26.4361	26.8385	26.2004	26.28	26.5932	26.8528	26.8715	26.9178	26.4401	26.7913	26.9277	26.8682	27.0015	26.84	26.2786	26.7285	24.8971	26.926	25.9003	26.3459	26.7229	26.9176	26.4506	26.5822	26.4361
Tb427_100095800	Tb427_100095800.1	http://tritrypdb.org/tritrypdb/processQuestion.do?questionFullName=GeneQuestions.GeneByLocusTag&questionSubmit=Get+Answer&ds_gene_ids_data=Tb427_100095800.1	Tb427_100095800	Tb427_100095800	Tb927.10.8900:mRNA-p1	Tb927.10.8900:mRNA-p1;Tb927.10.12810:mRNA-p1;Tb927.10.13290:mRNA-p1	CDP-alcohol phosphatidyltransferase, putative	5	5	5	12.7	47.838	432	27.7674	26.6014	27.3563	26.6946	26.8056	27.0128	27.1028	26.4702	26.9893	26.9637	27.3641	27.6923	27.5537	27.0272	27.0002	27.4451	27.6427	27.8583	27.8694	26.9061	27.7645	27.6645	28.0688	27.1622	27.7674	26.6014	27.3563	26.6946	26.8056	27.0128	27.1028	26.4702	26.9893	26.9637	27.3641	27.6923
Tb427_100140000	Tb427_100140000.1	http://tritrypdb.org/tritrypdb/processQuestion.do?questionFullName=GeneQuestions.GeneByLocusTag&questionSubmit=Get+Answer&ds_gene_ids_data=Tb427_100140000.1	Tb427_100140000	Tb427_100140000	Tb927.10.13290:mRNA-p1	Tb927.10.13290:mRNA-p1;Tb927.10.8900:mRNA-p1	CDP-alcohol phosphatidyltransferase, putative	4	4	4	12.1	45.283	412	27.5865	27.4625	27.5347	26.2742	28.025	27.4289	27.6238		26.7944	27.8017	27.2599	27.745	28.0961	28.1259	27.3399	27.3677	27.0831	28.7166	28.1346	27.6803	28.2904	28.458	27.3787	27.696	27.5865	27.4625	27.5347	26.2742	28.025	27.4289	27.6238	24.319	26.7944	27.8017	27.2599	27.745
Tb427_100135300	Tb427_100135300.1	http://tritrypdb.org/tritrypdb/processQuestion.do?questionFullName=GeneQuestions.GeneByLocusTag&questionSubmit=Get+Answer&ds_gene_ids_data=Tb427_100135300.1	Tb427_100135300	Tb427_100135300	Tb927.10.12810:mRNA-p1	Tb927.10.12810:mRNA-p1;Tb927.11.14140:mRNA-p1;Tb927.10.8900:mRNA-p1	CDP-alcohol phosphatidyltransferase/Cytidylyltransferase-like, putative	11	11	11	27.9	56.365	506	28.0727	27.8862	28.0456	27.3594	28.5837	28.3518	28.4083	28.1213	28.5897	28.4674	28.2943	28.2891	28.7886	28.7026	28.5942	28.6188	28.5945	28.9504	28.4904	28.4836	28.4407	28.4592	28.5784	28.6293	28.0727	27.8862	28.0456	27.3594	28.5837	28.3518	28.4083	28.1213	28.5897	28.4674	28.2943	28.2891
Tb427_040006000	Tb427_040006000.1	http://tritrypdb.org/tritrypdb/processQuestion.do?questionFullName=GeneQuestions.GeneByLocusTag&questionSubmit=Get+Answer&ds_gene_ids_data=Tb427_040006000.1	Tb427_040006000	Tb427_040006000	Tb927.4.410:mRNA-p1	Tb927.4.410:mRNA-p1	Cell differentiation family, Rcd1-like, putative	16	16	16	60.8	35.32	316	31.5611	31.5421	31.0233	31.5317	31.3147	31.5785	31.207	31.3432	31.5757	31.2925	31.1898	31.1081	31.24	31.3271	31.0006	31.1855	31.1716	31.0355	31.1577	31.1171	30.855	31.3091	31.0339	31.149	31.5611	31.5421	31.0233	31.5317	31.3147	31.5785	31.207	31.3432	31.5757	31.2925	31.1898	31.1081
Tb427_100061800	Tb427_100061800.1	http://tritrypdb.org/tritrypdb/processQuestion.do?questionFullName=GeneQuestions.GeneByLocusTag&questionSubmit=Get+Answer&ds_gene_ids_data=Tb427_100061800.1	Tb427_100061800	Tb427_100061800	Tb927.10.5770:mRNA-p1	Tb927.10.5770:mRNA-p1;Tb927.11.1660:mRNA-p1;Tb927.6.3790:mRNA-p1;Tb927.5.3920:mRNA-p1;Tb927.10.3520:mRNA-p1;Tb927.7.2500:mRNA-p1;Tb927.10.9740:mRNA-p1;Tb927.6.1090:mRNA-p1;Tb927.11.3740:mRNA-p1;Tb927.4.1250:mRNA-p1;Tb927.7.2550:mRNA-p1;Tb927.11.6350:mRNA-p1;Tb927.10.1210:mRNA-p1;Tb927.11.960:mRNA-p1;Tb927.11.3870:mRNA-p1;Tb927.11.8350:mRNA-p1;Tb927.11.14730:mRNA-p1;Tb927.10.7620:mRNA-p1;Tb927.3.1…	Cell division protein 48 (CDC48), N-terminal domain/Cell division protein 48 (CDC48), domain 2/Holliday junction DNA helicase RuvB P-loop domain/AAA domain (Cdc48 subfamily)/ATPase family associated with various cellular activities (AAA)/AAA+ lid domain containing protein, putative	52	52	52	74.2	85.803	780	33.21	33.1282	33.1352	33.162	33.4637	33.2206	33.2779	33.2619	33.3783	33.2583	33.378	33.3043	33.406	33.3428	33.2635	33.2271	33.0991	33.1096	32.9785	33.1945	33.1327	33.182	33.1721	33.116	33.21	33.1282	33.1352	33.162	33.4637	33.2206	33.2779	33.2619	33.3783	33.2583	33.378	33.3043
Tb427_100085800	Tb427_100085800.1	http://tritrypdb.org/tritrypdb/processQuestion.do?questionFullName=GeneQuestions.GeneByLocusTag&questionSubmit=Get+Answer&ds_gene_ids_data=Tb427_100085800.1	Tb427_100085800	Tb427_100085800	Tb927.10.7920:mRNA-p1	Tb927.10.7920:mRNA-p1	Centriolar protein SAS N-terminal, putative	7	7	7	31.7	26.034	230	28.4521	28.5005	27.8142	28.0301	28.3719	28.3395	28.206	28.1085	28.2729	28.1238	27.9924	28.107	28.5921	28.4985	28.1163	28.2588	28.4631	28.8419	28.5215	28.5122	28.5335	29.1515	28.4428	28.3461	28.4521	28.5005	27.8142	28.0301	28.3719	28.3395	28.206	28.1085	28.2729	28.1238	27.9924	28.107
Tb427_090059900	Tb427_090059900.1	http://tritrypdb.org/tritrypdb/processQuestion.do?questionFullName=GeneQuestions.GeneByLocusTag&questionSubmit=Get+Answer&ds_gene_ids_data=Tb427_090059900.1	Tb427_090059900	Tb427_090059900	Tb927.9.10550:mRNA-p1	Tb927.9.10550:mRNA-p1	Centriolar protein SAS N-terminal, putative	8	8	8	14.2	81.402	726	26.0411	26.0314	26.5233		26.2349	26.5125	26.2174		26.326	26.3628	26.257		26.4214		26.1582	26.1066	26.2137				26.0714	25.3987		25.5967	26.0411	26.0314	26.5233	25.1074	26.2349	26.5125	26.2174	24.3052	26.326	26.3628	26.257	24.4286
Tb427_100113700	Tb427_100113700.1	http://tritrypdb.org/tritrypdb/processQuestion.do?questionFullName=GeneQuestions.GeneByLocusTag&questionSubmit=Get+Answer&ds_gene_ids_data=Tb427_100113700.1	Tb427_100113700	Tb427_100113700	Tb927.10.10690:mRNA-p1	Tb927.10.10690:mRNA-p1	CEP19-like protein, putative	4	4	4	15.9	43.242	383	25.8062	25.6784			25.7732	25.9421	25.4645		25.7139	25.8522	25.5768	24.9365	25.5989	25.7168		25.212	25.674			25.4277	25.3181				25.8062	25.6784	25.0672	25.1514	25.7732	25.9421	25.4645	24.4403	25.7139	25.8522	25.5768	24.9365
Tb427_110095200	Tb427_110095200.1	http://tritrypdb.org/tritrypdb/processQuestion.do?questionFullName=GeneQuestions.GeneByLocusTag&questionSubmit=Get+Answer&ds_gene_ids_data=Tb427_110095200.1	Tb427_110095200	Tb427_110095200	Tb927.11.8860:mRNA-p1	Tb927.11.8860:mRNA-p1	CEP76 C2 domain containing protein, putative	15	15	15	32.8	70.944	632	27.3242	27.7756	27.3191	27.3736	27.205	28.0509	27.3935	27.2777	27.3089	27.1055	27.2893	27.4829	27.4127	27.4929	27.5951	27.482	26.9985	27.6535	27.2162	27.007	27.1721	28.1487	27.2016	27.964	27.3242	27.7756	27.3191	27.3736	27.205	28.0509	27.3935	27.2777	27.3089	27.1055	27.2893	27.4829
Tb427_070044900	Tb427_070044900.1	http://tritrypdb.org/tritrypdb/processQuestion.do?questionFullName=GeneQuestions.GeneByLocusTag&questionSubmit=Get+Answer&ds_gene_ids_data=Tb427_070044900.1	Tb427_070044900	Tb427_070044900			Cid1 family poly A polymerase, putative	23	23	23	27	107.52	976	28.1137	28.035	28.245	28.2616	28.3517	28.4255	28.0943	28.2959	28.4097	28.1067	28.2289	28.305	28.209	28.2366	28.1697	28.3662	28.5128	28.3571	28.3373	28.3367	28.4051	28.616	28.5279	28.4962	28.1137	28.035	28.245	28.2616	28.3517	28.4255	28.0943	28.2959	28.4097	28.1067	28.2289	28.305
Tb427_110086800	Tb427_110086800.1	http://tritrypdb.org/tritrypdb/processQuestion.do?questionFullName=GeneQuestions.GeneByLocusTag&questionSubmit=Get+Answer&ds_gene_ids_data=Tb427_110086800.1	Tb427_110086800	Tb427_110086800			Cid1 family poly A polymerase, putative	17	17	17	35.1	58.403	527	28.5006	28.5107	28.0175	27.9899	28.3066	28.7057	28.1682	27.8271	28.5064	28.2087	28.0798	28.016	28.1284	28.5579	28.1825	28.401	28.2501	28.341	28.4884	28.7355	28.2565	28.4448	28.3119	28.5428	28.5006	28.5107	28.0175	27.9899	28.3066	28.7057	28.1682	27.8271	28.5064	28.2087	28.0798	28.016
Tb427_100005000	Tb427_100005000.1	http://tritrypdb.org/tritrypdb/processQuestion.do?questionFullName=GeneQuestions.GeneByLocusTag&questionSubmit=Get+Answer&ds_gene_ids_data=Tb427_100005000.1	Tb427_100005000	Tb427_100005000			Cid1 family poly A polymerase, putative	2	2	2	5.3	42.852	375	25.0699	24.3639	24.5502	25.2088	25.2382			24.2971	24.3375		24.3218	24.154	24.3228	24.7556	24.4427	24.5512			24.7828				24.0939		25.0699	24.3639	24.5502	25.2088	25.2382	24.7554	24.6014	24.2971	24.3375	24.6122	24.3218	24.154
Tb427_100079000	Tb427_100079000.1	http://tritrypdb.org/tritrypdb/processQuestion.do?questionFullName=GeneQuestions.GeneByLocusTag&questionSubmit=Get+Answer&ds_gene_ids_data=Tb427_100079000.1	Tb427_100079000	Tb427_100079000			Cid1 family poly A polymerase, putative	13	13	13	18	91.876	827	26.8529	26.7187	26.5866		26.4077	26.517	26.8427		26.7998		26.5561	26.7509	26.3846	26.736	26.7977	26.7419			26.5904	26.4802		26.2885			26.8529	26.7187	26.5866	24.7758	26.4077	26.517	26.8427	24.8268	26.7998	24.6792	26.5561	26.7509
Tb427_110175100	Tb427_110175100.1	http://tritrypdb.org/tritrypdb/processQuestion.do?questionFullName=GeneQuestions.GeneByLocusTag&questionSubmit=Get+Answer&ds_gene_ids_data=Tb427_110175100.1	Tb427_110175100	Tb427_110175100			Cid1 family poly A polymerase, putative	8	8	8	25.2	37.656	333	28.7047	28.6404	28.814	28.7314	28.9143	28.9039	28.7614	26.9499	28.7258	28.6459	28.3227	28.1492	28.8312	28.3031	29.0827	28.488	28.6578	29.2641	28.309	28.5227	29.2488	29.3972	28.6767	28.5168	28.7047	28.6404	28.814	28.7314	28.9143	28.9039	28.7614	26.9499	28.7258	28.6459	28.3227	28.1492
Tb427_110032800	Tb427_110032800.1	http://tritrypdb.org/tritrypdb/processQuestion.do?questionFullName=GeneQuestions.GeneByLocusTag&questionSubmit=Get+Answer&ds_gene_ids_data=Tb427_110032800.1	Tb427_110032800	Tb427_110032800	Tb927.11.2790:mRNA-p1	Tb927.11.2790:mRNA-p1	Cilia- and flagella-associated protein 91, putative	23	23	23	35.8	80.037	709	28.7368	28.5947	28.655	27.9193	28.9584	28.7846	28.8412	28.8527	28.8273	28.2503	28.7643	28.5859	28.9496	28.5907	29.0058	28.7151	28.8518	29.0189	29.0695	28.8297	29.0877	29.1876	29.1807	28.8475	28.7368	28.5947	28.655	27.9193	28.9584	28.7846	28.8412	28.8527	28.8273	28.2503	28.7643	28.5859
Tb427_100152700	Tb427_100152700.1	http://tritrypdb.org/tritrypdb/processQuestion.do?questionFullName=GeneQuestions.GeneByLocusTag&questionSubmit=Get+Answer&ds_gene_ids_data=Tb427_100152700.1	Tb427_100152700	Tb427_100152700	Tb927.10.14440:mRNA-p1	Tb927.10.14440:mRNA-p1	Ciliary basal body-associated, B9 protein, putative	8	8	7	31.1	31.869	286	27.9193	27.4663	27.0071		27.1001	27.1109	26.9626	26.5752	27.2295	27.0131	26.8633	27.0595	27.1305	27.3959	27.1456	27.2683	27.2817	27.355	27.3868	27.212	26.7474	27.497	27.115	27.6549	27.9193	27.4663	27.0071	24.4093	27.1001	27.1109	26.9626	26.5752	27.2295	27.0131	26.8633	27.0595
Tb427_110007800	Tb427_110007800.1	http://tritrypdb.org/tritrypdb/processQuestion.do?questionFullName=GeneQuestions.GeneByLocusTag&questionSubmit=Get+Answer&ds_gene_ids_data=Tb427_110007800.1	Tb427_110007800	Tb427_110007800	Tb927.11.380:mRNA-p1	Tb927.11.380:mRNA-p1	Ciliary basal body-associated, B9 protein, putative	2	2	2	11.4	20.44	184	26.0194	25.6683				25.5109			25.3184	25.7507			25.5141	25.6403			25.4833	25.91				25.7998			26.0194	25.6683	24.677	24.5151	24.8099	25.5109	24.4721	24.31	25.3184	25.7507	23.935	24.9051
Tb427_080038800	Tb427_080038800.1	http://tritrypdb.org/tritrypdb/processQuestion.do?questionFullName=GeneQuestions.GeneByLocusTag&questionSubmit=Get+Answer&ds_gene_ids_data=Tb427_080038800.1	Tb427_080038800	Tb427_080038800	Tb927.8.3430:mRNA-p1	Tb927.8.3430:mRNA-p1	Ciliary basal body-associated, B9 protein, putative	4	4	4	7.4	55.957	501											24.9675			25.2225	25.1124	25.3384			25.2131						24.3813	24.9814	24.7683	25.0298	24.1664	24.5652	24.3798	24.0959	24.646	24.8022	24.9675	24.5246
Tb427_090061200	Tb427_090061200.1	http://tritrypdb.org/tritrypdb/processQuestion.do?questionFullName=GeneQuestions.GeneByLocusTag&questionSubmit=Get+Answer&ds_gene_ids_data=Tb427_090061200.1	Tb427_090061200	Tb427_090061200	Tb927.9.10670:mRNA-p1	Tb927.9.10670:mRNA-p1	Ciliary BBSome complex subunit 1, putative	5	5	5	10.2	65.588	597	25.1333	25.0721	25.1568		25.5103	25.2753	25.427	25.3178	25.5375	25.5414	24.6523	25.4218	25.0481	25.4822	25.2307	25.3304	25.0549	25.3392	25.5961	25.7928	25.174	25.0374	25.1736		25.1333	25.0721	25.1568	25.0446	25.5103	25.2753	25.427	25.3178	25.5375	25.5414	24.6523	25.4218
Tb427_060024500	Tb427_060024500.1	http://tritrypdb.org/tritrypdb/processQuestion.do?questionFullName=GeneQuestions.GeneByLocusTag&questionSubmit=Get+Answer&ds_gene_ids_data=Tb427_060024500.1	Tb427_060024500	Tb427_060024500	Tb927.6.2020:mRNA-p1	Tb927.6.2020:mRNA-p1	Ciliary BBSome complex subunit 2, N-terminal/Ciliary BBSome complex subunit 2, middle region/Ciliary BBSome complex subunit 2, C-terminal, putative	9	9	9	17.2	81.21	745	27.3793	27.0873		26.718	27.2284	26.3792	26.6637		27.7299	26.7966	27.478	27.2081	27.2733	27.0812	27.183	28.1017	27.3223	27.0013	27.3469	27.408	27.1279	27.1769	26.4795	27.8002	27.3793	27.0873	24.5273	26.718	27.2284	26.3792	26.6637	24.8044	27.7299	26.7966	27.478	27.2081
Tb427_100142000	Tb427_100142000.1	http://tritrypdb.org/tritrypdb/processQuestion.do?questionFullName=GeneQuestions.GeneByLocusTag&questionSubmit=Get+Answer&ds_gene_ids_data=Tb427_100142000.1	Tb427_100142000	Tb427_100142000	Tb927.10.13430:mRNA-p1	Tb927.10.13430:mRNA-p1	Citrate synthase, C-terminal domain containing protein, putative	43	43	43	75	53.57	484	33.5819	33.8511	33.1205	33.3416	35.3331	35.1687	35.0001	35.4066	35.7068	35.6916	35.619	35.8044	35.6881	35.8898	35.6586	35.8768	36.0249	36.0398	36.0805	36.1954	36.112	36.0341	36.1604	36.4516	33.5819	33.8511	33.1205	33.3416	35.3331	35.1687	35.0001	35.4066	35.7068	35.6916	35.619	35.8044
Tb427_110159700	Tb427_110159700.1	http://tritrypdb.org/tritrypdb/processQuestion.do?questionFullName=GeneQuestions.GeneByLocusTag&questionSubmit=Get+Answer&ds_gene_ids_data=Tb427_110159700.1	Tb427_110159700	Tb427_110159700	Tb927.11.14180:mRNA-p1	Tb927.11.14180:mRNA-p1	CLASP N terminal, putative	3	3	3	3	106.52	965	22.2311		22.2473		22.4939	21.9463			22.5279	22.1576	22.2271	22.2849			21.7537		22.3421	22.2759	22.8388						22.2311	24.705	22.2473	25.2077	22.4939	21.9463	24.1542	25.1429	22.5279	22.1576	22.2271	22.2849
Tb427_030042800	Tb427_030042800.1	http://tritrypdb.org/tritrypdb/processQuestion.do?questionFullName=GeneQuestions.GeneByLocusTag&questionSubmit=Get+Answer&ds_gene_ids_data=Tb427_030042800.1	Tb427_030042800	Tb427_030042800	Tb927.3.4000:mRNA-p1	Tb927.3.4000:mRNA-p1;Tb927.10.14260:mRNA-p1;Tb927.8.6680:mRNA-p1;Tb927.8.5250:mRNA-p1	Clathrin adaptor complex small chain, putative	7	7	7	47.2	18.381	159	27.4021	28.2889			28.2577	28.5512	28.6562		28.4473	29.0376	28.4967	28.4513	28.0549	28.9518	28.8128	28.5225	28.7374	28.9511	28.9336	28.7276	29.0029	28.9705	28.8801	29.2317	27.4021	28.2889	24.4895	24.7469	28.2577	28.5512	28.6562	24.3745	28.4473	29.0376	28.4967	28.4513
Tb427_080073100	Tb427_080073100.1	http://tritrypdb.org/tritrypdb/processQuestion.do?questionFullName=GeneQuestions.GeneByLocusTag&questionSubmit=Get+Answer&ds_gene_ids_data=Tb427_080073100.1	Tb427_080073100	Tb427_080073100	Tb927.8.6680:mRNA-p1	Tb927.8.6680:mRNA-p1;Tb927.3.4000:mRNA-p1;Tb927.10.14260:mRNA-p1	Clathrin adaptor complex small chain, putative	5	5	5	32.9	18.806	164	25.8961	26.2797	26.2101	26.2418	26.7398	26.1132	26.3312	26.646	26.1894	26.4443	25.9445	26.3182	26.4372	26.2924	26.0256	26.3336	26.022	26.2626	26.1684	26.2545	25.7471	26.0902		25.852	25.8961	26.2797	26.2101	26.2418	26.7398	26.1132	26.3312	26.646	26.1894	26.4443	25.9445	26.3182
Tb427_100047000	Tb427_100047000.1	http://tritrypdb.org/tritrypdb/processQuestion.do?questionFullName=GeneQuestions.GeneByLocusTag&questionSubmit=Get+Answer&ds_gene_ids_data=Tb427_100047000.1	Tb427_100047000	Tb427_100047000	Tb927.10.4270:mRNA-p1	Tb927.10.4270:mRNA-p1	Clathrin adaptor complex small chain, putative	7	7	7	33.3	20.54	183	29.8156	29.3535	29.769	29.2302	30.1944	28.8477	29.019	29.6798	30.1383	29.8114	29.7354	30.2863	30.138	30.2686	29.8215	30.3853	30.0562	30.0938	29.719	29.9653	29.7377	29.5744	29.6159	29.8461	29.8156	29.3535	29.769	29.2302	30.1944	28.8477	29.019	29.6798	30.1383	29.8114	29.7354	30.2863
Tb427_080057800	Tb427_080057800.1	http://tritrypdb.org/tritrypdb/processQuestion.do?questionFullName=GeneQuestions.GeneByLocusTag&questionSubmit=Get+Answer&ds_gene_ids_data=Tb427_080057800.1	Tb427_080057800	Tb427_080057800	Tb927.8.5250:mRNA-p1	Tb927.8.5250:mRNA-p1;Tb927.3.4000:mRNA-p1	Clathrin adaptor complex small chain/Adaptor complexes medium subunit family, putative	26	26	26	58.6	57.33	531	30.9582	30.9417	30.8516	30.7649	30.9882	30.8792	30.9514	30.7462	31.1119	30.9131	30.8367	30.8466	31.0779	31.0135	31.0583	30.9528	31.0756	30.8709	30.822	31.0617	30.9151	30.7625	30.9096	31.0959	30.9582	30.9417	30.8516	30.7649	30.9882	30.8792	30.9514	30.7462	31.1119	30.9131	30.8367	30.8466
Tb427_080076800	Tb427_080076800.1	http://tritrypdb.org/tritrypdb/processQuestion.do?questionFullName=GeneQuestions.GeneByLocusTag&questionSubmit=Get+Answer&ds_gene_ids_data=Tb427_080076800.1	Tb427_080076800	Tb427_080076800	Tb927.8.7050:mRNA-p1	Tb927.8.7050:mRNA-p1;Tb927.7.3180:mRNA-p1;Tb927.4.2020:mRNA-p1	Clathrin adaptor complex small chain/Adaptor complexes medium subunit family, putative	5	5	5	14.1	51.09	454	25.8496	25.5061					25.5314		25.5027	25.9012	25.1395		26.1287	26.0728	25.7332	25.2354		25.7608	25.5263	25.5217	25.5594	26.2846	25.6838	25.4009	25.8496	25.5061	24.562	24.7717	24.8354	24.9068	25.5314	24.4854	25.5027	25.9012	25.1395	24.3527
Tb427_100155900	Tb427_100155900.1	http://tritrypdb.org/tritrypdb/processQuestion.do?questionFullName=GeneQuestions.GeneByLocusTag&questionSubmit=Get+Answer&ds_gene_ids_data=Tb427_100155900.1	Tb427_100155900	Tb427_100155900	Tb927.10.14760:mRNA-p1	Tb927.10.14760:mRNA-p1	Clathrin light chain, putative	3	3	3	18	20.51	189	27.8065	28.9611			28.9149	29.35	28.6617	28.9094	28.4798	28.8189	29.164	29.0822	28.9525	28.9358	28.7797	28.775	28.8308	29.18	29.498	29.2799	29.3525	29.3515	28.8832	29.4564	27.8065	28.9611	25.015	25.1397	28.9149	29.35	28.6617	28.9094	28.4798	28.8189	29.164	29.0822
Tb427_100064700	Tb427_100064700.1	http://tritrypdb.org/tritrypdb/processQuestion.do?questionFullName=GeneQuestions.GeneByLocusTag&questionSubmit=Get+Answer&ds_gene_ids_data=Tb427_100064700.1	Tb427_100064700	Tb427_100064700	Tb927.10.6050:mRNA-p1	Tb927.10.6050:mRNA-p1;Tb11.v5.0197.1-p1;Tb11.v5.0198.1-p1	Clathrin, heavy-chain linker/Clathrin-H-link/Region in Clathrin and VPS, putative	109	109	109	79.3	190.62	1703	34.4431	34.4963	34.3304	34.1658	35.1573	35.0441	35.0351	34.9352	35.0837	35.1569	35.078	35.0677	35.3185	35.2915	35.092	35.1433	35.1278	35.4487	35.2119	35.3599	35.3218	35.3653	35.3168	35.6098	34.4431	34.4963	34.3304	34.1658	35.1573	35.0441	35.0351	34.9352	35.0837	35.1569	35.078	35.0677
Tb427_100029000	Tb427_100029000.1	http://tritrypdb.org/tritrypdb/processQuestion.do?questionFullName=GeneQuestions.GeneByLocusTag&questionSubmit=Get+Answer&ds_gene_ids_data=Tb427_100029000.1	Tb427_100029000	Tb427_100029000	Tb927.10.2470:mRNA-p1	Tb927.10.2470:mRNA-p1	Cleft lip and palate transmembrane protein 1 (CLPTM1), putative	16	16	16	37.5	64.237	550	27.7202	27.9063	27.2911	27.4268	28.2468	27.8137	28.0009	26.976	28.7188	27.9252	28.3012	28.1159	28.5976	28.2125	27.7658	28.6608	28.4281	28.6166	28.5121	28.1744	28.4123	28.4716	28.5264	27.9908	27.7202	27.9063	27.2911	27.4268	28.2468	27.8137	28.0009	26.976	28.7188	27.9252	28.3012	28.1159
Tb427_070056300	Tb427_070056300.1	http://tritrypdb.org/tritrypdb/processQuestion.do?questionFullName=GeneQuestions.GeneByLocusTag&questionSubmit=Get+Answer&ds_gene_ids_data=Tb427_070056300.1	Tb427_070056300	Tb427_070056300	Tb927.7.5060:mRNA-p1	Tb927.7.5060:mRNA-p1;Tb11.v5.0186.1-p1	CLN3 protein, putative	4	4	4	8.5	58.131	515									24.8268			25.5186						27.0543			25.6982	26.6181			24.933	24.7005	24.5764	24.8667	24.2516	24.6083	24.21	25.0948	24.8268	24.5892	23.9783	25.5186
Tb427_020031500	Tb427_020031500.1	http://tritrypdb.org/tritrypdb/processQuestion.do?questionFullName=GeneQuestions.GeneByLocusTag&questionSubmit=Get+Answer&ds_gene_ids_data=Tb427_020031500.1	Tb427_020031500	Tb427_020031500	Tb927.2.5980:mRNA-p1	Tb927.2.5980:mRNA-p1;Tb927.2.3030:mRNA-p1;Tb927.10.5770:mRNA-p1;Tb927.6.3030:mRNA-p1;Tb927.11.8730:mRNA-p1;Tb927.10.13510:mRNA-p1;Tb927.6.3890:mRNA-p1	Clp amino terminal domain, pathogenicity island component/ATPase family associated with various cellular activities (AAA)/AAA lid domain/Sigma-54 interaction domain/AAA domain (Cdc48 subfamily)/AAA domain (dynein-related subfamily)/C-terminal, D2-small domain, of ClpB protein, putative	59	59	59	67.9	97.037	870	32.1394	32.1926	31.81	31.8491	32.4798	32.2998	32.1281	32.3196	32.439	32.3183	32.3134	32.2335	32.6294	32.6446	32.329	32.3193	32.794	32.751	32.3893	32.6939	32.6296	32.9899	32.7315	32.7395	32.1394	32.1926	31.81	31.8491	32.4798	32.2998	32.1281	32.3196	32.439	32.3183	32.3134	32.2335
Tb427_080052900	Tb427_080052900.1	http://tritrypdb.org/tritrypdb/processQuestion.do?questionFullName=GeneQuestions.GeneByLocusTag&questionSubmit=Get+Answer&ds_gene_ids_data=Tb427_080052900.1	Tb427_080052900	Tb427_080052900	Tb927.8.4780:mRNA-p1	Tb927.8.4780:mRNA-p1;Tb927.11.1090:mRNA-p1;Tb927.11.1130:mRNA-p1;Tb11.v5.1038.1-p1;Tb11.v5.0432.1-p1;Tb11.v5.1011.1-p1;Tb927.11.1100:mRNA-p1;Tb927.11.1110.1-p1;Tb11.v5.1010.1-p1;Tb11.v5.0702.1-p1;Tb927.8.7950:mRNA-p1;Tb927.5.1850:mRNA-p1	Clustered mitochondria, putative	115	115	115	49.1	593.59	5285	32.0864	32.0209	31.9196	31.6725	32.2982	31.9843	31.975	31.8483	31.8986	31.8042	31.8414	31.6586	32.2252	32.0087	32.1979	31.8711	32.1597	31.952	31.9403	31.8723	32.1434	32.1659	32.0899	32.1172	32.0864	32.0209	31.9196	31.6725	32.2982	31.9843	31.975	31.8483	31.8986	31.8042	31.8414	31.6586
Tb427_110166000	Tb427_110166000.1	http://tritrypdb.org/tritrypdb/processQuestion.do?questionFullName=GeneQuestions.GeneByLocusTag&questionSubmit=Get+Answer&ds_gene_ids_data=Tb427_110166000.1	Tb427_110166000	Tb427_110166000	Tb927.11.14760:mRNA-p1	Tb927.11.14760:mRNA-p1	Clustered mitochondria/Translation initiation factor eIF3 subunit 135, putative	12	12	12	22.8	85.617	769	27.0351	27.5483	27.0464	27.4881	27.3375	26.56	27.6517	26.8123	26.7895	26.7747	26.6553	26.4512	26.2618	26.4584	25.95	26.2227	26.0395	25.6155	26.2717	26.1192			26.2897		27.0351	27.5483	27.0464	27.4881	27.3375	26.56	27.6517	26.8123	26.7895	26.7747	26.6553	26.4512
Tb427_030010800	Tb427_030010800.1	http://tritrypdb.org/tritrypdb/processQuestion.do?questionFullName=GeneQuestions.GeneByLocusTag&questionSubmit=Get+Answer&ds_gene_ids_data=Tb427_030010800.1	Tb427_030010800	Tb427_030010800	Tb927.3.1110:mRNA-p1	Tb927.3.1110:mRNA-p1;Tb11.v5.0589.1-p1;Tb927.2.4230:mRNA-p1	Clusterin-associated protein-1, putative	21	21	21	50.7	52.683	477	29.5419	29.425	29.2539	29.0495	29.4849	29.4766	29.7157	29.6286	29.4785	29.6853	29.5078	29.3718	29.7179	29.6627	29.5253	29.2348	29.4847	29.8159	29.0529	29.2208	29.5821	29.7712	29.1878	29.3643	29.5419	29.425	29.2539	29.0495	29.4849	29.4766	29.7157	29.6286	29.4785	29.6853	29.5078	29.3718
Tb427_010031800	Tb427_010031800.1	http://tritrypdb.org/tritrypdb/processQuestion.do?questionFullName=GeneQuestions.GeneByLocusTag&questionSubmit=Get+Answer&ds_gene_ids_data=Tb427_010031800.1	Tb427_010031800	Tb427_010031800	Tb927.1.4760:mRNA-p1	Tb927.1.4760:mRNA-p1	CNH domain/Vacuolar sorting protein 39 domain 1/Vacuolar sorting protein 39 domain 2, putative	21	21	21	22	114.65	1028	27.5505	27.5689	27.4054	27.2029	27.5189	27.4468	27.4563	27.1593	27.4802	27.3809	27.3234	27.3328	27.4838	27.4525	27.7979	27.5137	27.4351	27.6577	27.6377	27.5041	27.4065	27.8349	27.7096	27.5773	27.5505	27.5689	27.4054	27.2029	27.5189	27.4468	27.4563	27.1593	27.4802	27.3809	27.3234	27.3328
Tb427_030022000	Tb427_030022000.1	http://tritrypdb.org/tritrypdb/processQuestion.do?questionFullName=GeneQuestions.GeneByLocusTag&questionSubmit=Get+Answer&ds_gene_ids_data=Tb427_030022000.1	Tb427_030022000	Tb427_030022000	Tb927.3.2230:mRNA-p1	Tb927.3.2230:mRNA-p1	CoA binding domain/CoA-ligase, putative	27	27	27	65.4	31.464	301	34.8752	34.9764	34.6826	34.9515	34.9395	35.2336	35.3328	35.0366	35.0058	35.4194	35.3959	35.4341	35.3506	35.6203	35.3082	35.6727	34.7902	35.2874	35.4897	35.9885	35.5913	35.3617	35.4874	36.0797	34.8752	34.9764	34.6826	34.9515	34.9395	35.2336	35.3328	35.0366	35.0058	35.4194	35.3959	35.4341
Tb427_110167400	Tb427_110167400.1	http://tritrypdb.org/tritrypdb/processQuestion.do?questionFullName=GeneQuestions.GeneByLocusTag&questionSubmit=Get+Answer&ds_gene_ids_data=Tb427_110167400.1	Tb427_110167400	Tb427_110167400	Tb927.11.14900:mRNA-p1	Tb927.11.14900:mRNA-p1	Coatomer epsilon subunit, putative	18	18	18	64.2	34.594	324	30.1852	29.9799	29.6851	29.8946	29.938	29.8025	29.7904	29.9847	30.0053	29.857	29.8689	29.6931	29.825	29.8931	29.8782	29.8887	30.2498	29.991	29.9255	29.9087	29.8727	30.0837	29.8031	29.9825	30.1852	29.9799	29.6851	29.8946	29.938	29.8025	29.7904	29.9847	30.0053	29.857	29.8689	29.6931
Tb427_110102900	Tb427_110102900.1	http://tritrypdb.org/tritrypdb/processQuestion.do?questionFullName=GeneQuestions.GeneByLocusTag&questionSubmit=Get+Answer&ds_gene_ids_data=Tb427_110102900.1	Tb427_110102900	Tb427_110102900	Tb927.11.9490:mRNA-p1	Tb927.11.9490:mRNA-p1	CobW/HypB/UreG, nucleotide-binding domain containing protein, putative	7	7	7	27.4	38.157	343	29.0557	29.126	28.1867	28.2886	28.472	28.5462	28.0556	28.1397	28.0977	28.4565	28.3782	27.983	28.2435	28.2774	28.2179	28.0979	27.6485	27.7014	28.49	28.4019	28.1934	27.7923	27.9518	27.7696	29.0557	29.126	28.1867	28.2886	28.472	28.5462	28.0556	28.1397	28.0977	28.4565	28.3782	27.983
Tb427_110031800	Tb427_110031800.1	http://tritrypdb.org/tritrypdb/processQuestion.do?questionFullName=GeneQuestions.GeneByLocusTag&questionSubmit=Get+Answer&ds_gene_ids_data=Tb427_110031800.1	Tb427_110031800	Tb427_110031800	Tb927.11.2690:mRNA-p1	Tb927.11.2690:mRNA-p1	Coenzyme A transferase, putative	26	26	26	68.8	53.093	493	33.931	33.8101	33.4202	33.3638	34.0877	34.016	33.9198	33.8252	34.0539	33.9384	33.9745	33.9767	34.1184	33.822	33.8858	34.029	34.3362	33.6077	34.1701	34.2298	34.2324	33.5853	34.258	34.3949	33.931	33.8101	33.4202	33.3638	34.0877	34.016	33.9198	33.8252	34.0539	33.9384	33.9745	33.9767
Tb427_110153500	Tb427_110153500.1	http://tritrypdb.org/tritrypdb/processQuestion.do?questionFullName=GeneQuestions.GeneByLocusTag&questionSubmit=Get+Answer&ds_gene_ids_data=Tb427_110153500.1	Tb427_110153500	Tb427_110153500	Tb927.11.13580:mRNA-p1	Tb927.11.13580:mRNA-p1	Coenzyme Q (ubiquinone) biosynthesis protein Coq4, putative	10	10	10	57.4	27.93	249	28.8188	28.834	28.3558	29.1814	28.4604	28.9569	28.7422	28.9832	28.821	28.5716	28.9434	28.2815	28.3902	28.7662	28.8542	28.9571	28.5841	28.8581	29.27	28.7508	28.8526	29.1793	29.3455	28.5291	28.8188	28.834	28.3558	29.1814	28.4604	28.9569	28.7422	28.9832	28.821	28.5716	28.9434	28.2815
Tb427_040026000	Tb427_040026000.1	http://tritrypdb.org/tritrypdb/processQuestion.do?questionFullName=GeneQuestions.GeneByLocusTag&questionSubmit=Get+Answer&ds_gene_ids_data=Tb427_040026000.1	Tb427_040026000	Tb427_040026000	Tb927.4.2350:mRNA-p1	Tb927.4.2350:mRNA-p1	Cofilin/tropomyosin-type actin-binding protein, putative	13	13	13	55.3	34.809	320	28.6618	28.68	28.4209	28.4169	28.8601	28.7983	28.8232	28.7479	28.6841	28.9546	28.6531	28.7163	28.8629	29.2069	28.6696	28.3965	28.6897	28.7264	28.2472	29.4549	28.9019	29.0557	28.4535	29.0622	28.6618	28.68	28.4209	28.4169	28.8601	28.7983	28.8232	28.7479	28.6841	28.9546	28.6531	28.7163
Tb427_030055300	Tb427_030055300.1	http://tritrypdb.org/tritrypdb/processQuestion.do?questionFullName=GeneQuestions.GeneByLocusTag&questionSubmit=Get+Answer&ds_gene_ids_data=Tb427_030055300.1	Tb427_030055300	Tb427_030055300	Tb927.3.5180:mRNA-p1	Tb927.3.5180:mRNA-p1	Cofilin/tropomyosin-type actin-binding protein, putative	9	9	9	83.1	15.119	136	32.2442	31.9683	31.6105	31.8607	32.2675	31.7228	31.8007	31.9536	32.3206	31.8457	32.0274	32.1295	32.1758	31.9507	31.8361	32.0029	32.2273	32.0792	31.9384	32.0846	31.9529	31.8408	31.9447	31.7669	32.2442	31.9683	31.6105	31.8607	32.2675	31.7228	31.8007	31.9536	32.3206	31.8457	32.0274	32.1295
Tb427_110121100	Tb427_110121100.1	http://tritrypdb.org/tritrypdb/processQuestion.do?questionFullName=GeneQuestions.GeneByLocusTag&questionSubmit=Get+Answer&ds_gene_ids_data=Tb427_110121100.1	Tb427_110121100	Tb427_110121100	Tb927.11.10580:mRNA-p1	Tb927.11.10580:mRNA-p1	COG (conserved oligomeric Golgi) complex component, COG2/Domain of unknown function (DUF3510), putative	18	18	18	25.2	99.171	881	28.4857	28.2935	27.7604	27.9657	28.4214	28.5572	28.3017	27.985	28.5393	28.177	28.0455	28.2432	28.4907	28.5429	28.041	28.497	28.2552	28.4217	28.253	28.413	28.0226	28.4661	28.2056	28.0578	28.4857	28.2935	27.7604	27.9657	28.4214	28.5572	28.3017	27.985	28.5393	28.177	28.0455	28.2432
Tb427_070080600	Tb427_070080600.1	http://tritrypdb.org/tritrypdb/processQuestion.do?questionFullName=GeneQuestions.GeneByLocusTag&questionSubmit=Get+Answer&ds_gene_ids_data=Tb427_070080600.1	Tb427_070080600	Tb427_070080600	Tb927.7.7290:mRNA-p1	Tb927.7.7290:mRNA-p1;Tb11.v5.0620.1-p1;Tb11.v5.0619.1-p1	COG4 transport protein, putative	11	11	11	13.5	113.07	1015	27.0262	26.2043	26.2175	26.4426	26.5906	26.2779	26.3844	26.3335	26.4993	26.3431	25.9976	26.0666	26.2724	26.402	26.3707	26.6258	26.7065	26.632	26.4792	26.525	26.4715	26.581	26.8076	26.5105	27.0262	26.2043	26.2175	26.4426	26.5906	26.2779	26.3844	26.3335	26.4993	26.3431	25.9976	26.0666
Tb427_110048800	Tb427_110048800.1	http://tritrypdb.org/tritrypdb/processQuestion.do?questionFullName=GeneQuestions.GeneByLocusTag&questionSubmit=Get+Answer&ds_gene_ids_data=Tb427_110048800.1	Tb427_110048800	Tb427_110048800	Tb927.11.4360:mRNA-p1	Tb927.11.4360:mRNA-p1	Coiled-coil domain-containing protein 124 /Oxs1, putative	8	8	8	36.6	29.733	257	29.1674	29.0263	28.6847	28.6684	28.8597	28.6676	28.4686	28.7218	28.306	27.9747	28.6196	28.7212	28.5269	28.726	28.3569	28.4425	28.6466	28.3182	27.8289	28.6519	28.3434	28.3569	28.3593	28.6334	29.1674	29.0263	28.6847	28.6684	28.8597	28.6676	28.4686	28.7218	28.306	27.9747	28.6196	28.7212
Tb427_080084500	Tb427_080084500.1	http://tritrypdb.org/tritrypdb/processQuestion.do?questionFullName=GeneQuestions.GeneByLocusTag&questionSubmit=Get+Answer&ds_gene_ids_data=Tb427_080084500.1	Tb427_080084500	Tb427_080084500			'Cold-shock' DNA-binding domain containing protein, putative	7	7	7	22	52.508	504							26.8271	26.2228	27.3673	27.2703	27.2956	27.3655	27.8799	28.0163	28.3275	27.78	28.686	28.3586	28.6063	28.7507	28.4877	28.0301	28.5336	27.9954	24.9849	24.8538	24.6478	25.0011	24.7567	24.4493	26.8271	26.2228	27.3673	27.2703	27.2956	27.3655
Tb427_070043500	Tb427_070043500.1	http://tritrypdb.org/tritrypdb/processQuestion.do?questionFullName=GeneQuestions.GeneByLocusTag&questionSubmit=Get+Answer&ds_gene_ids_data=Tb427_070043500.1	Tb427_070043500	Tb427_070043500			'Cold-shock' DNA-binding domain containing protein, putative	11	11	11	22.6	41.763	381	29.663	29.7892	29.9713	29.8927	29.7161	29.8303	29.8077	29.6736	29.8688	29.7461	29.8799	29.9964	29.8017	29.6633	30.1109	30.2658	30.0156	30.1268	30.2086	30.187	29.7946	30.0471	29.9963	29.8333	29.663	29.7892	29.9713	29.8927	29.7161	29.8303	29.8077	29.6736	29.8688	29.7461	29.8799	29.9964
Tb427_110086200	Tb427_110086200.1	http://tritrypdb.org/tritrypdb/processQuestion.do?questionFullName=GeneQuestions.GeneByLocusTag&questionSubmit=Get+Answer&ds_gene_ids_data=Tb427_110086200.1	Tb427_110086200	Tb427_110086200			'Cold-shock' DNA-binding domain containing protein, putative	11	11	11	57.4	15.118	141	30.6119	30.5312	31.0118	30.5178	30.5637	30.3794	30.0527	31.0683	30.7041	30.8905	30.7736	30.9169	30.4906	30.2994	30.0957	30.5035	31.3124	30.1542	30.6572	30.5238	30.0927	30.375	30.7296	30.5471	30.6119	30.5312	31.0118	30.5178	30.5637	30.3794	30.0527	31.0683	30.7041	30.8905	30.7736	30.9169
Tb427_070072500	Tb427_070072500.1	http://tritrypdb.org/tritrypdb/processQuestion.do?questionFullName=GeneQuestions.GeneByLocusTag&questionSubmit=Get+Answer&ds_gene_ids_data=Tb427_070072500.1	Tb427_070072500	Tb427_070072500	Tb927.7.6650:mRNA-p1	Tb927.7.6650:mRNA-p1	Colon cancer-associated protein Mic1-like, putative	4	4	4	5.1	118.41	1069																		25.7605		26.2858		25.9232			24.4766	24.383	24.49	25.3486	24.55	24.4628	25.0545	24.6096	24.2845	24.422	24.6115	24.456
Tb427_100127400	Tb427_100127400.1	http://tritrypdb.org/tritrypdb/processQuestion.do?questionFullName=GeneQuestions.GeneByLocusTag&questionSubmit=Get+Answer&ds_gene_ids_data=Tb427_100127400.1	Tb427_100127400	Tb427_100127400	Tb927.10.12000:mRNA-p1	Tb927.10.12000:mRNA-p1	Complex 1 protein (LYR family), putative	8	8	8	67.7	11.728	99	27.6226	28.677	27.4842	26.8669	28.4883	28.5465	28.6127	28.2264	28.1943	28.4352	28.5521	28.4623	28.5233	29.2422	28.9892	29.3318	29.0117	29.1429	29.2999	29.6138	29.4082	29.214	29.1123	30.0243	27.6226	28.677	27.4842	26.8669	28.4883	28.5465	28.6127	28.2264	28.1943	28.4352	28.5521	28.4623
Tb427_100136200	Tb427_100136200.1	http://tritrypdb.org/tritrypdb/processQuestion.do?questionFullName=GeneQuestions.GeneByLocusTag&questionSubmit=Get+Answer&ds_gene_ids_data=Tb427_100136200.1	Tb427_100136200	Tb427_100136200	Tb927.10.12900:mRNA-p1	Tb927.10.12900:mRNA-p1	Complex 1 protein (LYR family), putative	5	5	5	28.8	18.033	156	25.9421	24.9709	25.6256		25.8019	25.7259	25.9384	26.3605	25.8373	25.9494	26.1031	25.9387	25.872	26.0543	26.0546	25.0855	26.1693	26.4301	26.6155	26.4784	26.6721	26.1627	26.2845	26.6499	25.9421	24.9709	25.6256	24.4872	25.8019	25.7259	25.9384	26.3605	25.8373	25.9494	26.1031	25.9387
Tb427_100156800	Tb427_100156800.1	http://tritrypdb.org/tritrypdb/processQuestion.do?questionFullName=GeneQuestions.GeneByLocusTag&questionSubmit=Get+Answer&ds_gene_ids_data=Tb427_100156800.1	Tb427_100156800	Tb427_100156800	Tb927.10.14860:mRNA-p1	Tb927.10.14860:mRNA-p1	Complex 1 protein (LYR family), putative	32	32	32	51.3	83.499	713	30.1891	30.0691	30.2493	30.2985	30.5869	30.496	30.5186	30.4192	30.5537	30.3986	30.6097	30.4803	30.4376	30.73	30.7187	30.6552	30.2287	30.2955	30.5883	30.5526	30.2162	30.1719	30.4947	30.21	30.1891	30.0691	30.2493	30.2985	30.5869	30.496	30.5186	30.4192	30.5537	30.3986	30.6097	30.4803
Tb427_110173000	Tb427_110173000.1	http://tritrypdb.org/tritrypdb/processQuestion.do?questionFullName=GeneQuestions.GeneByLocusTag&questionSubmit=Get+Answer&ds_gene_ids_data=Tb427_110173000.1	Tb427_110173000	Tb427_110173000	Tb927.11.15440:mRNA-p1	Tb927.11.15440:mRNA-p1	Complex 1 protein (LYR family), putative	7	7	7	32	23.683	206	27.3083	27.2238	27.1735	27.0261	27.4216	27.6103	27.3492	26.387	26.9604	27.1127	26.5459	27.0678	27.0339	27.6269	26.8898	27.3949	26.9326	27.7169	27.5261	28.2106	27.3376	27.7392	27.2971	27.6934	27.3083	27.2238	27.1735	27.0261	27.4216	27.6103	27.3492	26.387	26.9604	27.1127	26.5459	27.0678
Tb427_030009100	Tb427_030009100.1	http://tritrypdb.org/tritrypdb/processQuestion.do?questionFullName=GeneQuestions.GeneByLocusTag&questionSubmit=Get+Answer&ds_gene_ids_data=Tb427_030009100.1	Tb427_030009100	Tb427_030009100	Tb927.3.940:mRNA-p1	Tb927.3.940:mRNA-p1	Complex 1 protein (LYR family), putative	6	6	6	37.7	18.107	154	26.8723	27.9062	27.245	26.6232	26.7828	27.3664	27.1165	26.1715	25.9802		26.511		25.5787		26.1873		25.8679	25.6815	26.7262	27.0589	26.6764	26.2935			26.8723	27.9062	27.245	26.6232	26.7828	27.3664	27.1165	26.1715	25.9802	24.6048	26.511	24.1795
Tb427_040013200	Tb427_040013200.1	http://tritrypdb.org/tritrypdb/processQuestion.do?questionFullName=GeneQuestions.GeneByLocusTag&questionSubmit=Get+Answer&ds_gene_ids_data=Tb427_040013200.1	Tb427_040013200	Tb427_040013200	Tb927.4.1130:mRNA-p1	Tb927.4.1130:mRNA-p1	Complex 1 protein (LYR family), putative	4	4	4	15.8	18.785	165		26.0683			25.3646	26.0265				26.009			25.2862	25.8102				25.7703		25.8892		25.9229	25.6915		25.0694	26.0683	24.6667	25.4216	25.3646	26.0265	24.2767	24.2504	24.6767	26.009	23.9568	25.0045
Tb427_110045700	Tb427_110045700.1	http://tritrypdb.org/tritrypdb/processQuestion.do?questionFullName=GeneQuestions.GeneByLocusTag&questionSubmit=Get+Answer&ds_gene_ids_data=Tb427_110045700.1	Tb427_110045700	Tb427_110045700	Tb927.11.4020:mRNA-p1	Tb927.11.4020:mRNA-p1	Complex1_LYR-like, putative	6	6	6	33.7	19.197	163	27.0341	27.2425	27.2434	27.2045	27.9972	27.3917	27.3652	27.1969	27.2887	27.3961	28.4235	27.798	27.5664	27.2975	27.7586	28.0894	27.9354	28.1658	28.5787	27.5076	28.2695	28.412	28.5174	27.962	27.0341	27.2425	27.2434	27.2045	27.9972	27.3917	27.3652	27.1969	27.2887	27.3961	28.4235	27.798
Tb427_110040400	Tb427_110040400.1	http://tritrypdb.org/tritrypdb/processQuestion.do?questionFullName=GeneQuestions.GeneByLocusTag&questionSubmit=Get+Answer&ds_gene_ids_data=Tb427_110040400.1	Tb427_110040400	Tb427_110040400	Tb927.11.3530.2:mRNA-p1	Tb927.11.3530.2:mRNA-p1;Tb927.11.3530.1:mRNA-p1	Complex1_LYR-like/Complex 1 protein (LYR family), putative	5	5	5	21.3	26.464	225		24.8804		25.1678			24.4032																		24.7175	24.8804	24.2719	25.1678	24.1547	24.8275	24.4032	25.0012	24.8835	24.7173	24.7045	24.6788
Tb427_040056400	Tb427_040056400.1	http://tritrypdb.org/tritrypdb/processQuestion.do?questionFullName=GeneQuestions.GeneByLocusTag&questionSubmit=Get+Answer&ds_gene_ids_data=Tb427_040056400.1	Tb427_040056400	Tb427_040056400	Tb927.4.5320:mRNA-p1	Tb927.4.5320:mRNA-p1;Tb927.8.7090:mRNA-p1	Component of IIS longevity pathway SMK-1, putative	14	6	6	17.5	97.079	888	25.5302	26.0153	25.3412	25.1308	25.6746	26.3483	25.9094		26.1624	25.5789	25.5506	25.7636	25.6386	26.3065	25.4282	25.7044	25.6505	25.7877	25.8472	26.2227	25.8606	25.9993	25.6156		25.5302	26.0153	25.3412	25.1308	25.6746	26.3483	25.9094	24.4313	26.1624	25.5789	25.5506	25.7636
Tb427_080077200	Tb427_080077200.1	http://tritrypdb.org/tritrypdb/processQuestion.do?questionFullName=GeneQuestions.GeneByLocusTag&questionSubmit=Get+Answer&ds_gene_ids_data=Tb427_080077200.1	Tb427_080077200	Tb427_080077200	Tb927.8.7090:mRNA-p1	Tb927.8.7090:mRNA-p1;Tb927.4.5320:mRNA-p1	Component of IIS longevity pathway SMK-1, putative	17	17	9	21.5	95.9	876	28.0639	27.8458	28.0078	27.9454	27.8916	28.2997	28.1568	27.4631	27.8462	28.0289	28.1631	28.5248	27.9119	27.8696	27.4562	28.3392	27.8422	27.8257	27.6197	27.5913	27.6881	27.9071	28.1691	27.2926	28.0639	27.8458	28.0078	27.9454	27.8916	28.2997	28.1568	27.4631	27.8462	28.0289	28.1631	28.5248
[truncated: 4,687 more rows]
[truncated: 50 more columns]

## Sheet: 2d vs 0d
red: proteins upregulated > 2, bold: p values < 0.025
blue: proteins downregulated > 2, bold: p values < 0.025
[truncated: 200 more rows]

## Sheet: 3d vs 0d
red: proteins upregulated > 2, bold: p values < 0.025
[truncated: 359 more rows]

## Sheet: 4d vs 0d
red: proteins upregulated > 2, bold: p values < 0.025
[truncated: 434 more rows]

[truncated: 2 more sheets: 6d vs 0d, 8d vs 0d]
